# Supplementary material for: Characterization of Chikungunya Virus Induced Host Response in a Mouse Model of Viral Myositis
Source: PubMed Central journal article supplement (PMC3965460; doi:10.1371/journal.pone.0092813), 2014-03-25
Supplement: pone.0092813.s003.pdf [file pone.0092813.s003.pdf]

# Sample M1

4700 Reflector Spec #1 MC=>BC=>NR(2.00)[BP = 1558.0, 18865]

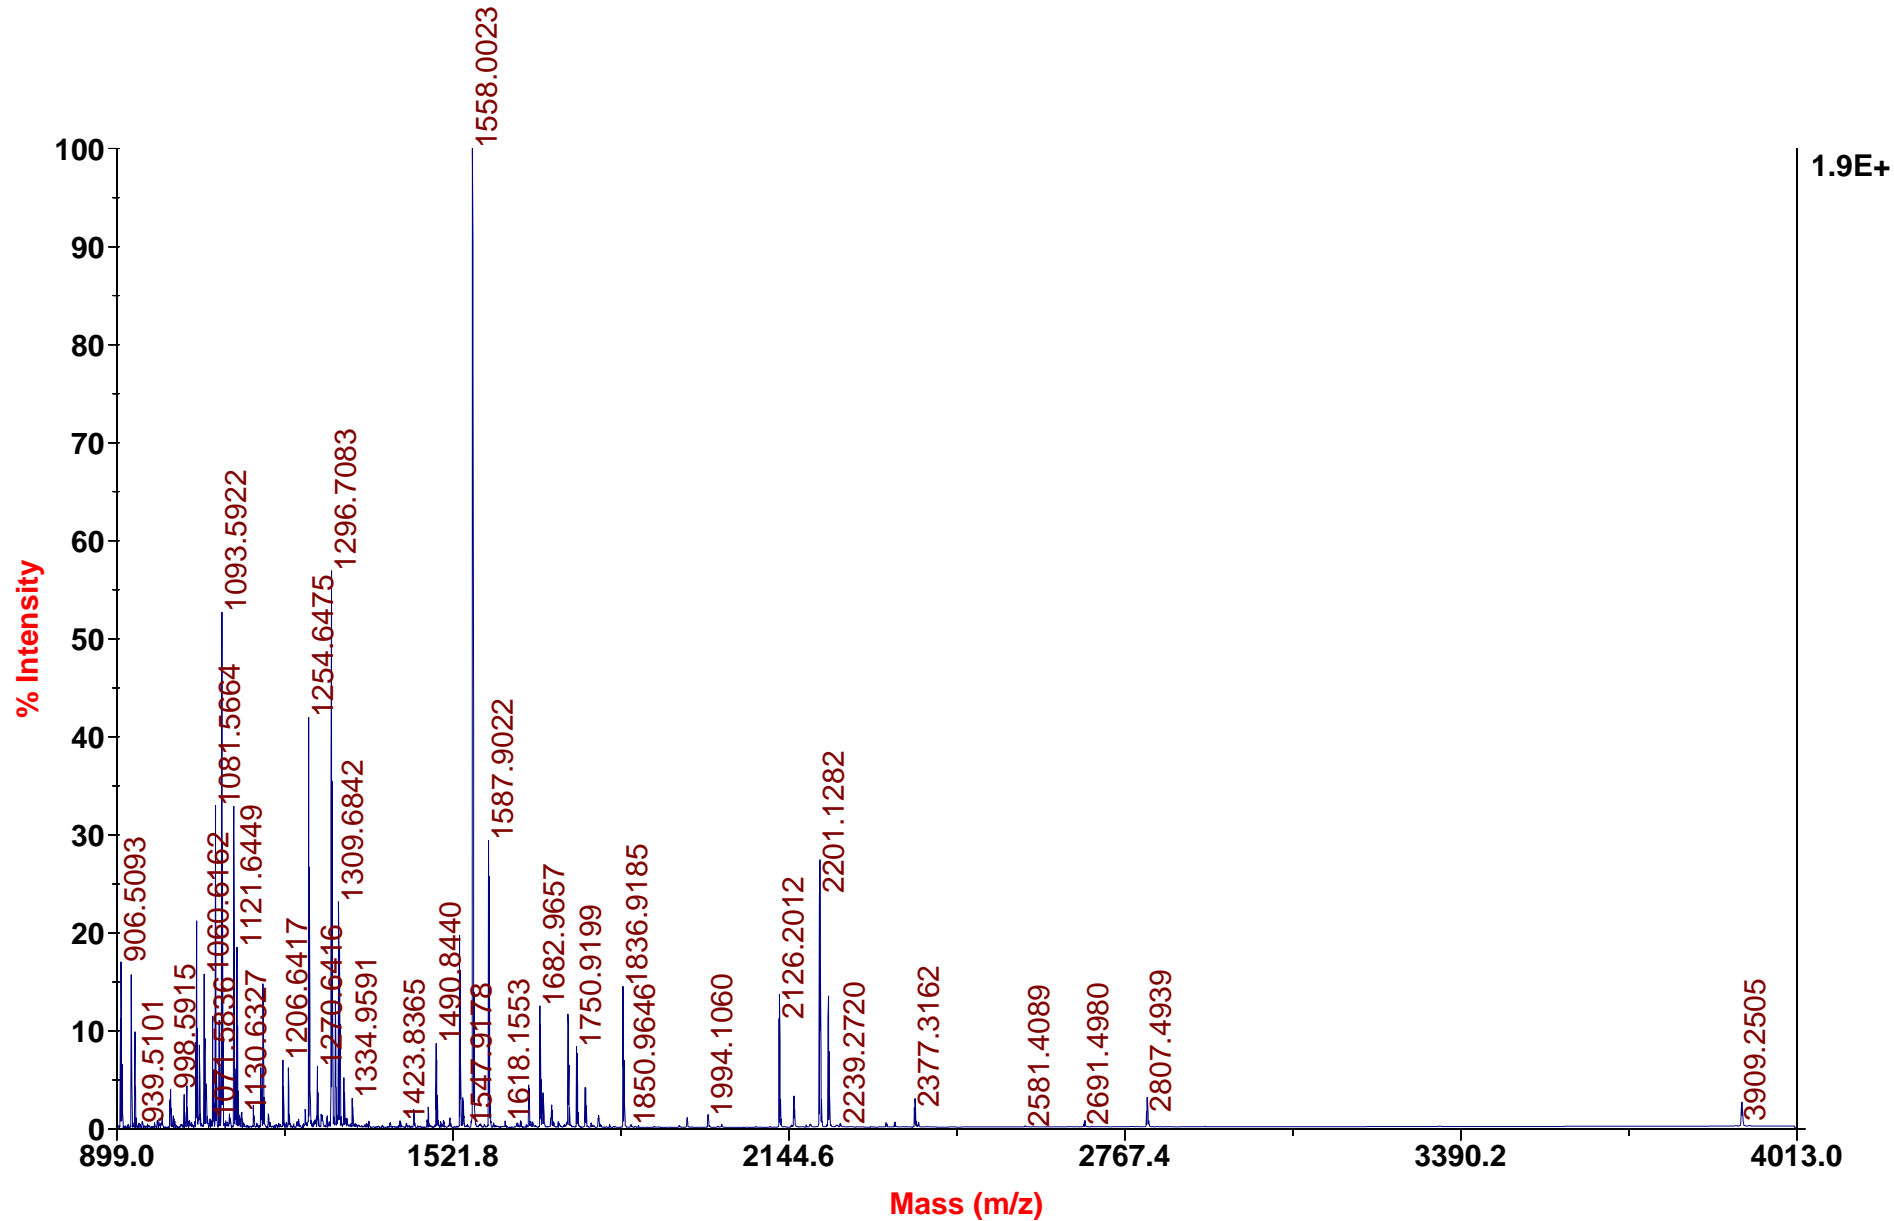

## Mascot Score Histogram

Protein score is  $-10 \cdot \log(P)$ , where  $P$  is the probability that the observed match is a random event. Protein scores greater than 62 are significant ( $p < 0.05$ ).

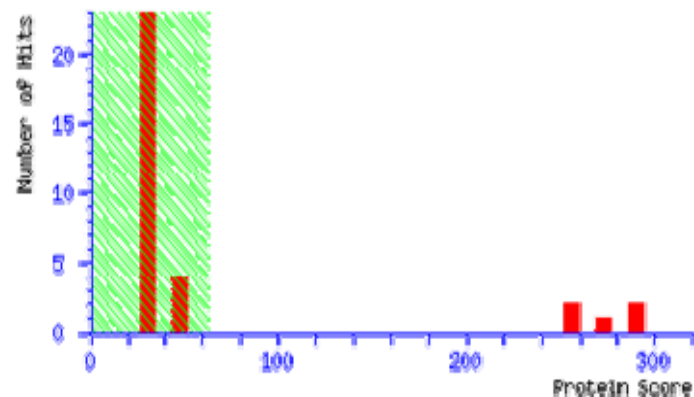

## Concise Protein Summary Report

Format As

Concise Protein Summary

[Help](#)

Significance threshold  $p <$

Max. number of hits

Re-Search All

Search Unmatched

- [CAA39807](#) **Mass:** 53689 **Score:** 290 **Expect:** 9.2e-25 **Matches:** 59  
MMVMTM NID: - Mus musculus

---

- [VIME\\_MOUSE](#) **Mass:** 53524 **Score:** 290 **Expect:** 9.2e-25 **Matches:** 59  
Vimentin.- Mus musculus (Mouse).  
[Q5FWJ3\\_MOUSE](#) **Mass:** 53655 **Score:** 289 **Expect:** 1.2e-24 **Matches:** 59  
Vimentin (NOD-derived CD11c +ve dendritic cells cdna, RIKEN full-length enriched library, clone:F630103E23 product:vimentin,  
[CAA69019](#) **Mass:** 51533 **Score:** 282 **Expect:** 5.8e-24 **Matches:** 58  
MMVIMENT NID: - Mus musculus  
[Q3TFD9\\_MOUSE](#) **Mass:** 53656 **Score:** 276 **Expect:** 2.3e-23 **Matches:** 57  
17 days embryo heart cdna, RIKEN full-length enriched library, clone:I920087013 product:vimentin, full insert sequence.- Mus

# Protein View

Match to: **CAA39807** Score: 290 Expect: 9.2e-25  
MMVMTM NID: - Mus musculus  
Found in search of pmf\_A2\_129990848800.txt

Nominal mass (M<sub>r</sub>): 53689; Calculated pI value: 5.06  
NCBI BLAST search of [CAA39807](#) against nr  
Unformatted [sequence string](#) for pasting into other applications

Taxonomy: [Mus musculus](#)

Variable modifications: Carbamidomethyl (C), Deamidated (NQ), Oxidation (M)  
Cleavage by Trypsin: cuts C-term side of KR unless next residue is P  
Number of mass values searched: 132  
Number of mass values matched: 59  
Sequence Coverage: 77%

Matched peptides shown in **Bold Red**

1 **MSTRSVSSSS YRRMFGSGT SSRPSSNRSY VTTSTRITYSL GSALRPSTSR**  
51 **SLYSSSPGGA YVTRSSAVRL RSVVPGVRL QDSVDFSLAD AINTEFKNTR**  
101 **TNEKVELQEL NDRFANYIDK VRFLEQQNKI LLAELEQLKG QGKSRLGDLY**  
151 **EEEMRELRQ VDQFTNDKAR VEVERDNLAE DIMRLREKLQ EEMLQREEAE**  
201 **STLQSRQDV DNASLARLDL ERKVESLQEE IAFLKKLHDE EIQLQAAIQ**  
251 **EQHVQIDVDV SKPDLTAALR DVRQQYESVA AKNLQEAEEW YKSKFADLSE**  
301 **AANRRNDALR QAKQESNEYR RQVQSLTCEV DALKGTNESL ERQMREMEEN**  
351 **FALEAANYQD TIGRLQDEIQ NMKEEMARHL REYQDLLNVK MALDIEIATY**  
401 **RKLLGEESR ISLPLPTFSS LNLRETNLES LPLVDTHSKR TLLIKTVETR**  
451 **DGQVINETSQ HHDDLE**

Show predicted peptides also

Sort Peptides By  Residue Number  Increasing Mass  Decreasing Mass

| Start - End | Observed  | Mr(expt)  | Mr(calc)  | ppm | Miss | Sequence                                   |
|-------------|-----------|-----------|-----------|-----|------|--------------------------------------------|
| 2 - 12      | 1216.7050 | 1215.6977 | 1215.5844 | 93  | 1    | <b>M. STRSVSSSSYR. R</b>                   |
| 5 - 13      | 1028.5620 | 1027.5547 | 1027.5047 | 49  | 1    | <b>R. SVSSSSYRR. M</b>                     |
| 79 - 97     | 2126.1985 | 2125.1912 | 2125.0579 | 63  | 0    | <b>R. LLQDSVDFSLADAINTEFK. N</b>           |
| 101 - 113   | 1587.9003 | 1586.8930 | 1586.7900 | 65  | 1    | <b>R. TNEKVELQELNDR. F</b>                 |
| 105 - 113   | 1115.6379 | 1114.6306 | 1114.5618 | 62  | 0    | <b>K. VELQELNDR. F</b>                     |
| 114 - 122   | 1125.6663 | 1124.6590 | 1124.5978 | 54  | 1    | <b>R. FANYIDKVR. F</b>                     |
| 123 - 129   | 906.5092  | 905.5019  | 905.4607  | 46  | 0    | <b>R. FLEQQNK. I</b>                       |
| 123 - 129   | 908.4391  | 907.4318  | 907.4287  | 3   | 0    | <b>R. FLEQQNK. I 2 Deamidated (NQ)</b>     |
| 130 - 139   | 1169.7773 | 1168.7700 | 1168.7067 | 54  | 0    | <b>K. ILLAELEQLK. G</b>                    |
| 130 - 143   | 1540.0043 | 1538.9970 | 1538.9032 | 61  | 1    | <b>K. ILLAELEQLKGQGK. S</b>                |
| 146 - 155   | 1254.6475 | 1253.6402 | 1253.5598 | 64  | 0    | <b>R. LGDLYEEEMR. E</b>                    |
| 146 - 155   | 1270.6410 | 1269.6337 | 1269.5547 | 62  | 0    | <b>R. LGDLYEEEMR. E Oxidation (M)</b>      |
| 146 - 158   | 1668.8984 | 1667.8911 | 1667.7824 | 65  | 1    | <b>R. LGDLYEEEMRELR. R Oxidation (M)</b>   |
| 160 - 170   | 1323.7225 | 1322.7152 | 1322.6102 | 79  | 1    | <b>R. QVDQFTNDKAR. V 2 Deamidated (NQ)</b> |
| 171 - 184   | 1688.9368 | 1687.9295 | 1687.8199 | 65  | 1    | <b>R. VEVERDNLAEDIMR. L</b>                |
| 171 - 184   | 1704.9309 | 1703.9236 | 1703.8148 | 64  | 1    | <b>R. VEVERDNLAEDIMR. L Oxidation (M)</b>  |

# M1

4700 MS/MS Precursor 1093.59 Spec #1 MC[BP = 175.1, 1637]

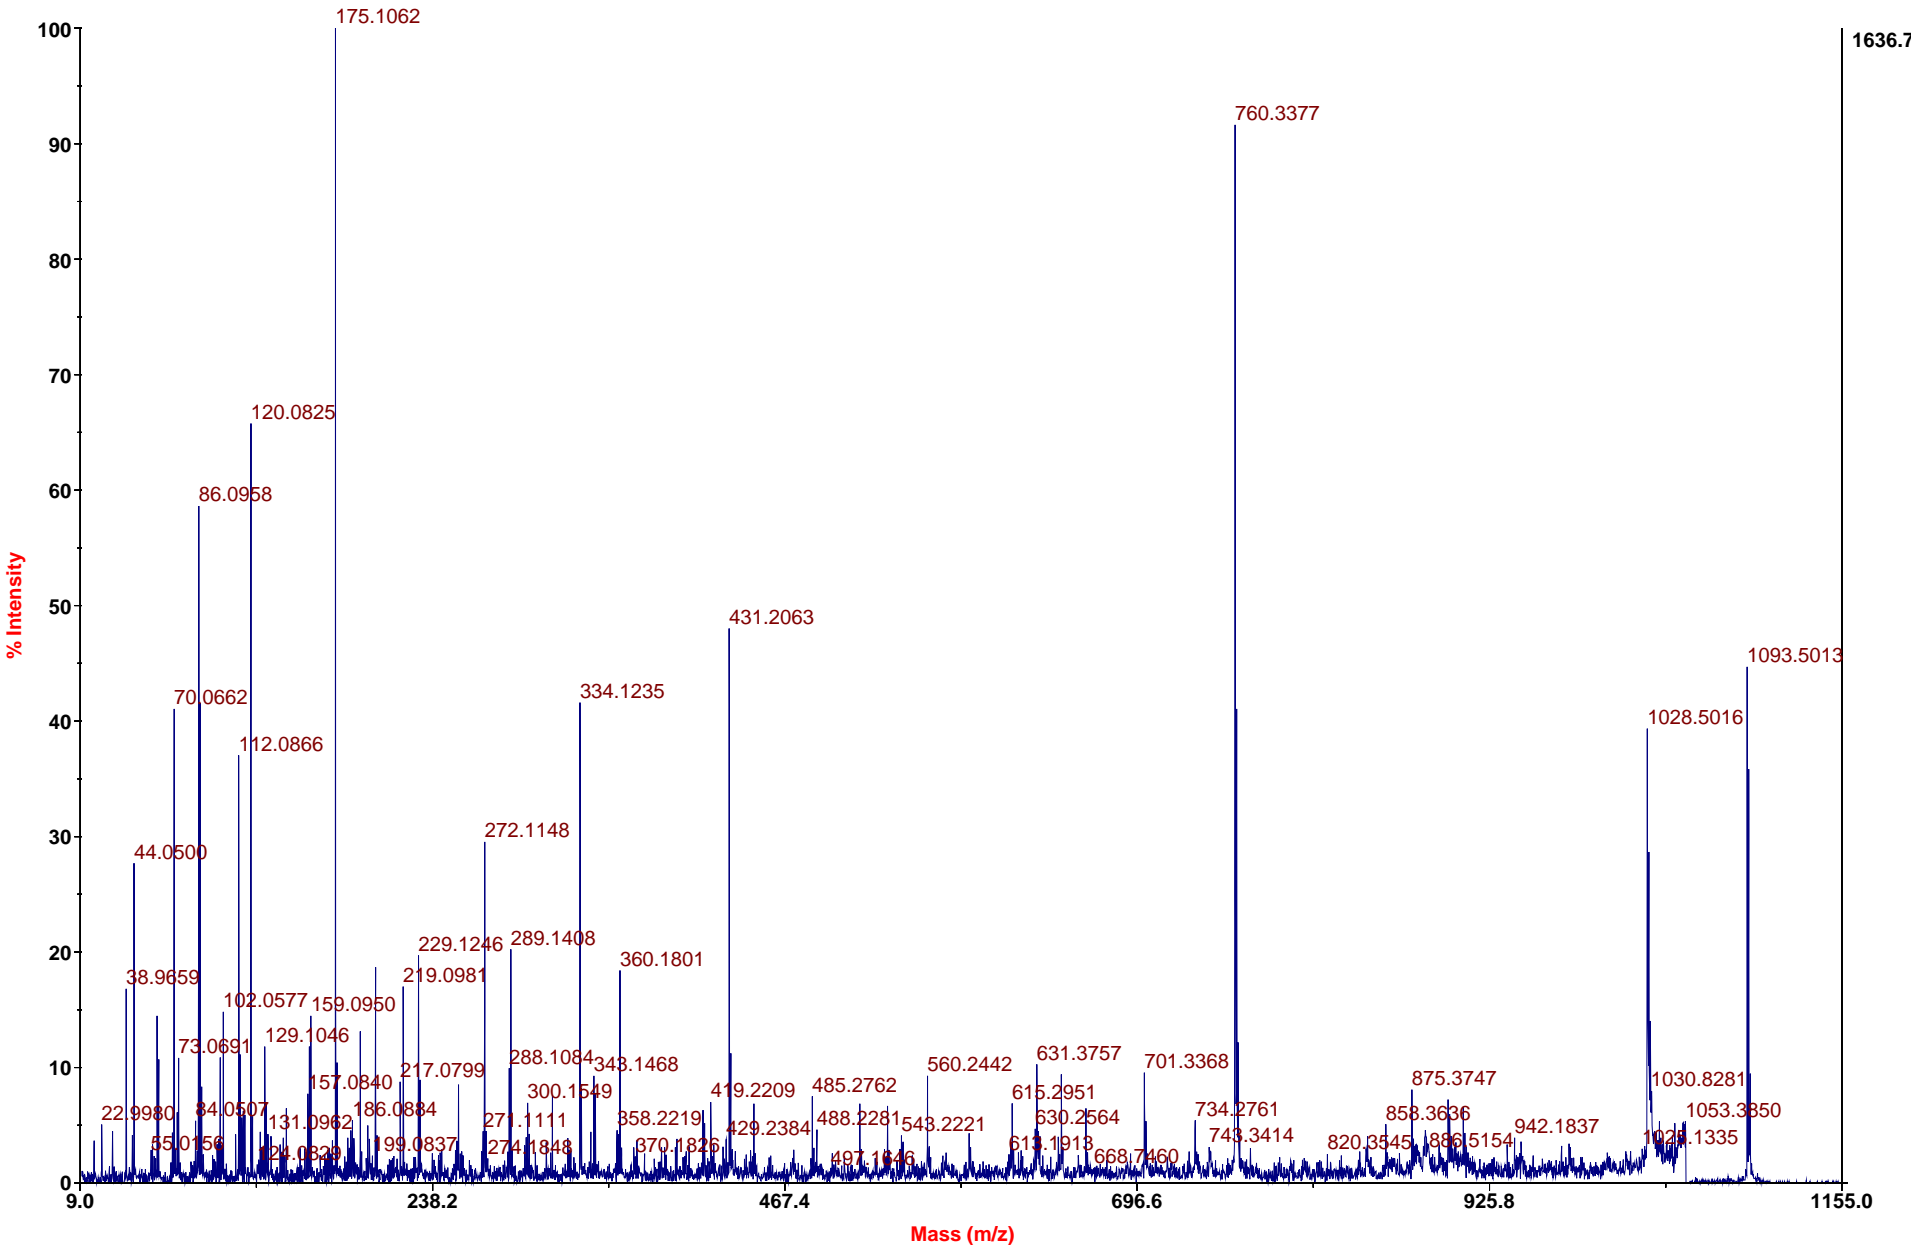



# M1

4700 MS/MS Precursor 1295.75 Spec #1 MC[BP = 1296.6, 2988]

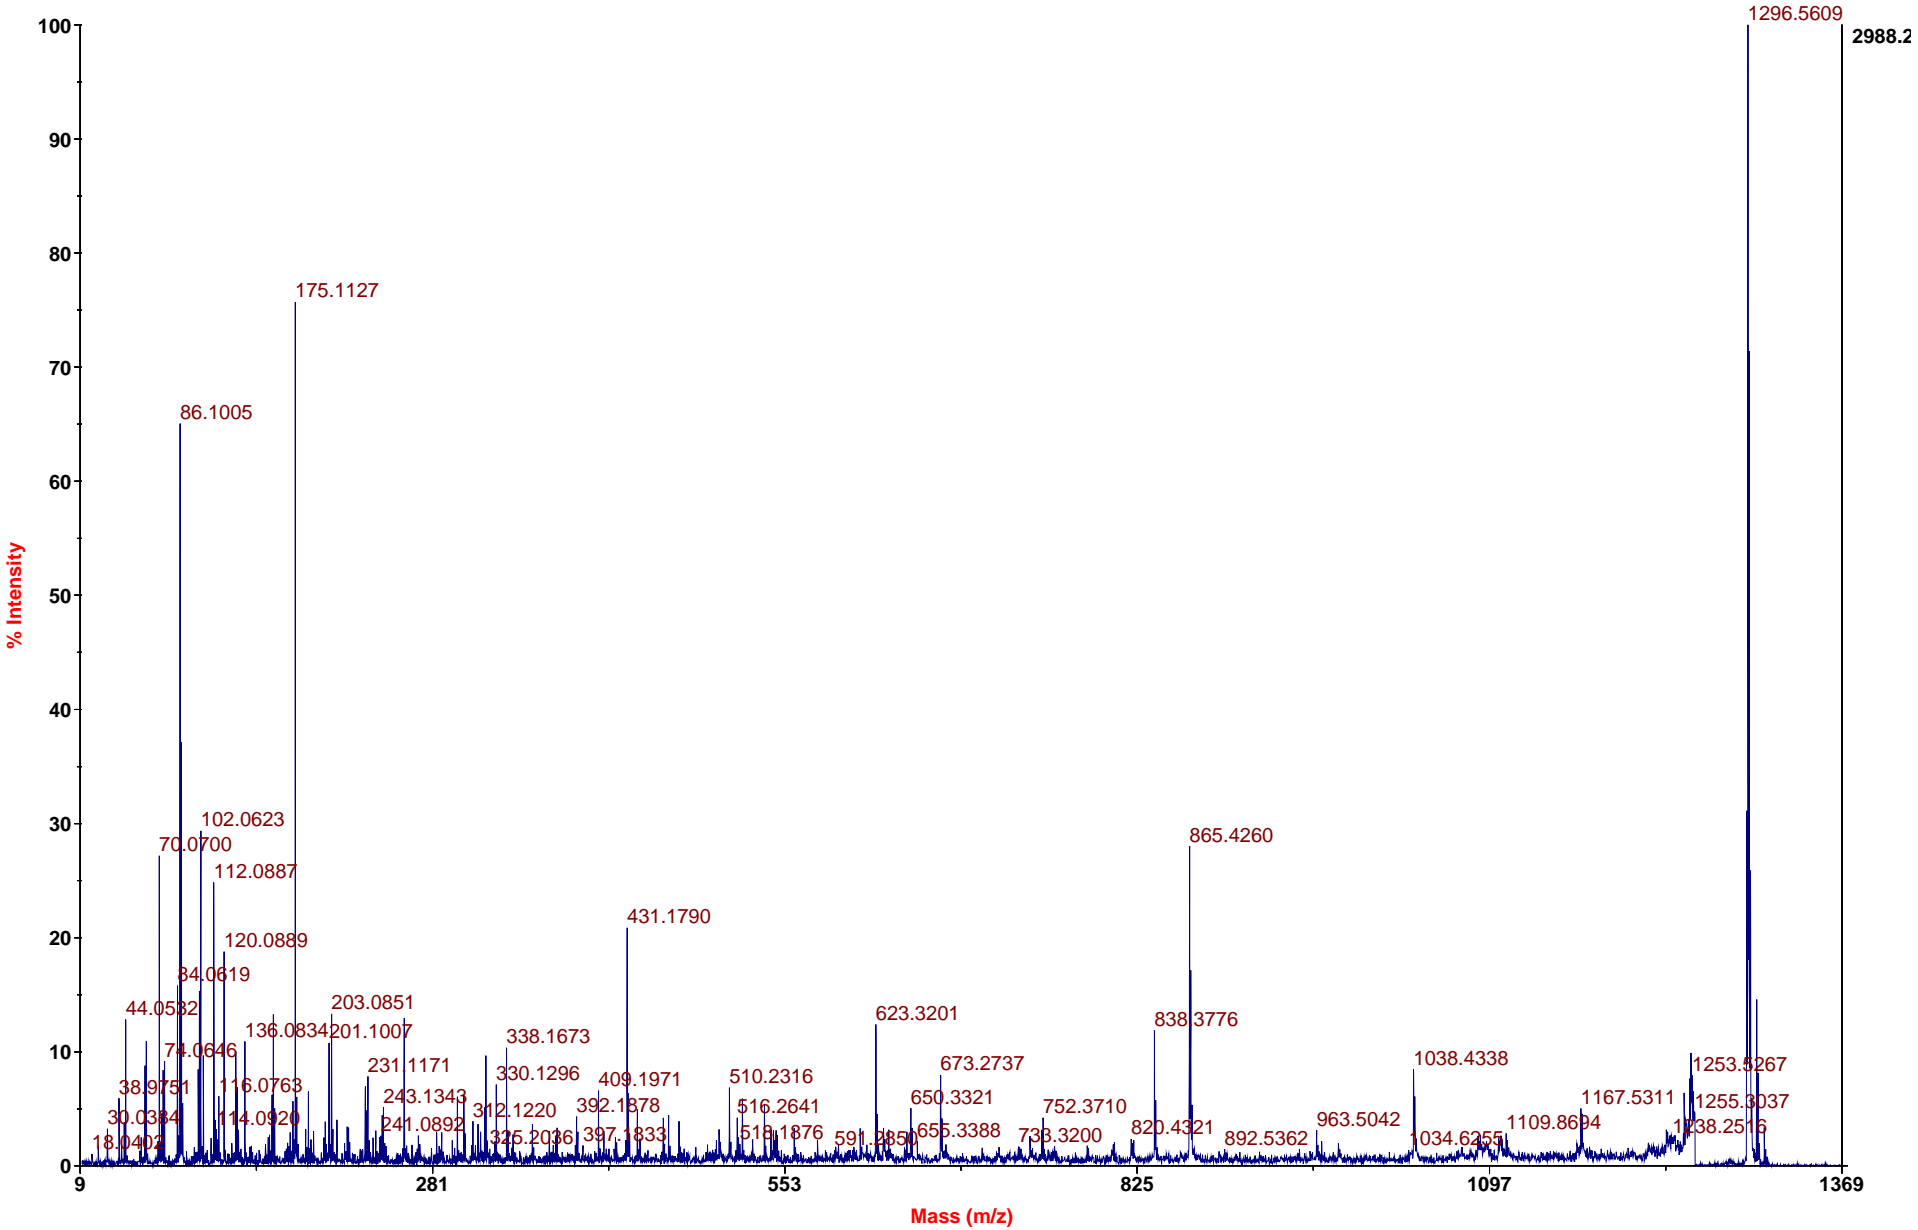

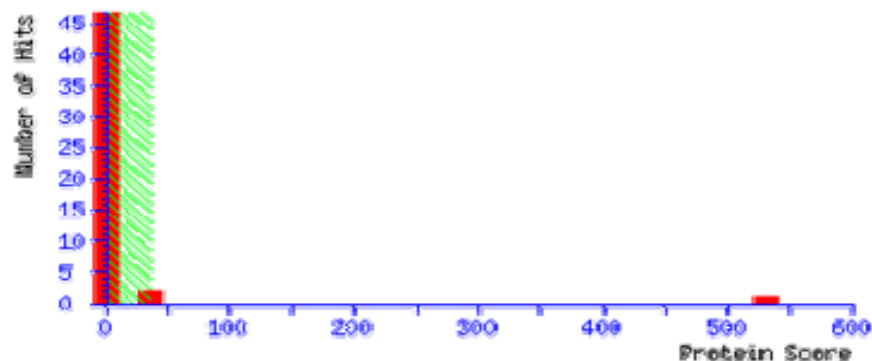

## Peptide Summary Report

Format As

Peptide Summary

[Help](#)

Significance threshold  $p <$

Max. number of hits

Standard scoring  MudPIT scoring

Ions score or expect cut-off

Show sub-sets

Show pop-ups  Suppress pop-ups

Sort unassigned

Require bold red

Select All

Select None

Search Selected

Error tolerant

1. [VIME\\_MOUSE](#) Mass: 53524 Score: 530 Matches: 20 (14) Sequences: 19 (14) emPAI: 4.20  
Vimentin.- Mus musculus (Mouse).

Check to include this hit in error tolerant search

| Query                                                 | Observed  | Mr(expt)  | Mr(calc)  | ppm  | Miss | Score | Expect  | Rank | Unique | Peptide         |
|-------------------------------------------------------|-----------|-----------|-----------|------|------|-------|---------|------|--------|-----------------|
| <input checked="" type="checkbox"/> <a href="#">1</a> | 906.5092  | 905.5019  | 905.4607  | 45.6 | 0    | 36    | 0.072   | 1    |        | R.FLEQQNK.I     |
| <input checked="" type="checkbox"/> <a href="#">2</a> | 925.4561  | 924.4488  | 924.3937  | 59.7 | 0    | 33    | 0.12    | 1    | U      | K.QESNEYR.R     |
| <input checked="" type="checkbox"/> <a href="#">3</a> | 1046.6010 | 1045.5937 | 1045.5226 | 68.0 | 0    | 18    | 4.4     | 1    | U      | K.LQEMLQR.E     |
| <input checked="" type="checkbox"/> <a href="#">4</a> | 1081.5643 | 1080.5570 | 1080.4948 | 57.6 | 1    | 16    | 6       | 1    | U      | K.QESNEYRR.Q    |
| <input checked="" type="checkbox"/> <a href="#">5</a> | 1093.5905 | 1092.5832 | 1092.5200 | 57.9 | 0    | 58    | 0.00051 | 1    | U      | K.FADLSEAANR.N  |
| <input checked="" type="checkbox"/> <a href="#">6</a> | 1115.6379 | 1114.6306 | 1114.5618 | 61.7 | 0    | 38    | 0.043   | 1    | U      | K.VELQELNDR.F   |
| <input checked="" type="checkbox"/> <a href="#">7</a> | 1169.7773 | 1168.7700 | 1168.7067 | 54.2 | 0    | 63    | 1.9e-05 | 1    | U      | K.ILLAELEQLK.G  |
| <input checked="" type="checkbox"/> <a href="#">8</a> | 1254.6475 | 1253.6402 | 1253.5598 | 64.2 | 0    | 52    | 0.002   | 1    | U      | R.LGDLYEEEMR.E  |
| <input checked="" type="checkbox"/> <a href="#">9</a> | 1295.7474 | 1294.7401 | 1294.6591 | 62.6 | 0    | 29    | 0.26    | 1    | U      | K.MALDIEIATYR.K |

## Protein View

Match to: **VIME\_MOUSE** Score: 530  
Vimentin.- **Mus musculus (Mouse)**.  
Found in search of ppw\_A2\_129990854000.txt

Nominal mass ( $M_r$ ): 53524; Calculated pI value: 5.06  
NCBI BLAST search of [VIME\\_MOUSE](#) against nr  
Unformatted [sequence string](#) for pasting into other applications

Taxonomy: [Mus musculus](#)

Variable modifications: Carbamidomethyl (C), Deamidated (NQ), Oxidation (M)  
Cleavage by Trypsin: cuts C-term side of KR unless next residue is P  
Sequence Coverage: 45%

Matched peptides shown in **Bold Red**

```
1 STRSVSSSSY RRMFGGSGTS SRPSSNRSYV TTSTRITYSLG SALRPSTSRG
51 LYSSSPGGAY VTRSSAVRLR SSVPGVRLLQ DSVDFSLADA INTEFKNTRT
101 NEKVELQELN DRFANYIDKV RFLEQQNKIL LAELEQLKGQ GKSRLGDLYE
151 EEMRELRRQV DQLTNDKARV EVERDNLAED IMRLREKLQE EMLQREEAES
201 TLQSFQRQVD NASLARLDLE RKVESLQEEI AFLKLHDEE IQELQAQIQE
251 QHVQIDVDVS KPDLTAALRD VRQQYESVAA KNLQEAEEWY KSKFADLSEA
301 ANRNNDALRQ AKQESNEYRR QVQSLTCEVD ALKGTNESLE RQMREMEENF
351 ALEAANYQDT IGRLQDEIQN MKEEMARHLR EYQDLLNVKM ALDIEIATYR
401 KLEGEESRI SLPLPTFSSL NLRETNLESL PLVDTHSKRT LLIKTVETRD
451 GQVINETSQH HDDLE
```

Show predicted peptides also

Sort Peptides By

Residue Number  Increasing Mass  Decreasing Mass

| Start - End | Observed  | Mr(expt)  | Mr(calc)  | ppm | Miss | Sequence                                                          |
|-------------|-----------|-----------|-----------|-----|------|-------------------------------------------------------------------|
| 78 - 96     | 2126.1985 | 2125.1912 | 2125.0579 | 63  | 0    | <b>R.LLQDSVDFSLADAINTEFK.N</b> ( <a href="#">Ions score 109</a> ) |
| 100 - 112   | 1587.9003 | 1586.8930 | 1586.7900 | 65  | 1    | <b>R.TNEKVELQELNDR.F</b> ( <a href="#">Ions score 58</a> )        |
| 104 - 112   | 1115.6379 | 1114.6306 | 1114.5618 | 62  | 0    | <b>K.VELQELNDR.F</b> ( <a href="#">Ions score 38</a> )            |
| 122 - 128   | 906.5092  | 905.5019  | 905.4607  | 46  | 0    | <b>R.FLEQQNK.I</b> ( <a href="#">Ions score 36</a> )              |
| 129 - 138   | 1169.7773 | 1168.7700 | 1168.7067 | 54  | 0    | <b>K.ILLAELEQLK.G</b> ( <a href="#">Ions score 63</a> )           |
| 145 - 154   | 1254.6475 | 1253.6402 | 1253.5598 | 64  | 0    | <b>R.LGDLYEEEMR.E</b> ( <a href="#">Ions score 52</a> )           |
| 188 - 195   | 1046.6010 | 1045.5937 | 1045.5226 | 68  | 0    | <b>K.LQEMLQR.E</b> ( <a href="#">Ions score 18</a> )              |
| 222 - 234   | 1533.9469 | 1532.9396 | 1532.8450 | 62  | 1    | <b>R.KVESLQEEIAFLK.K</b> ( <a href="#">Ions score 78</a> )        |
| 282 - 291   | 1309.6841 | 1308.6768 | 1308.5986 | 60  | 0    | <b>K.NLQEAEEWYK.S</b> ( <a href="#">Ions score 46</a> )           |

# Sample M2

4700 Reflector Spec #1 MC=>NR(2.00)[BP = 1060.6, 16121]

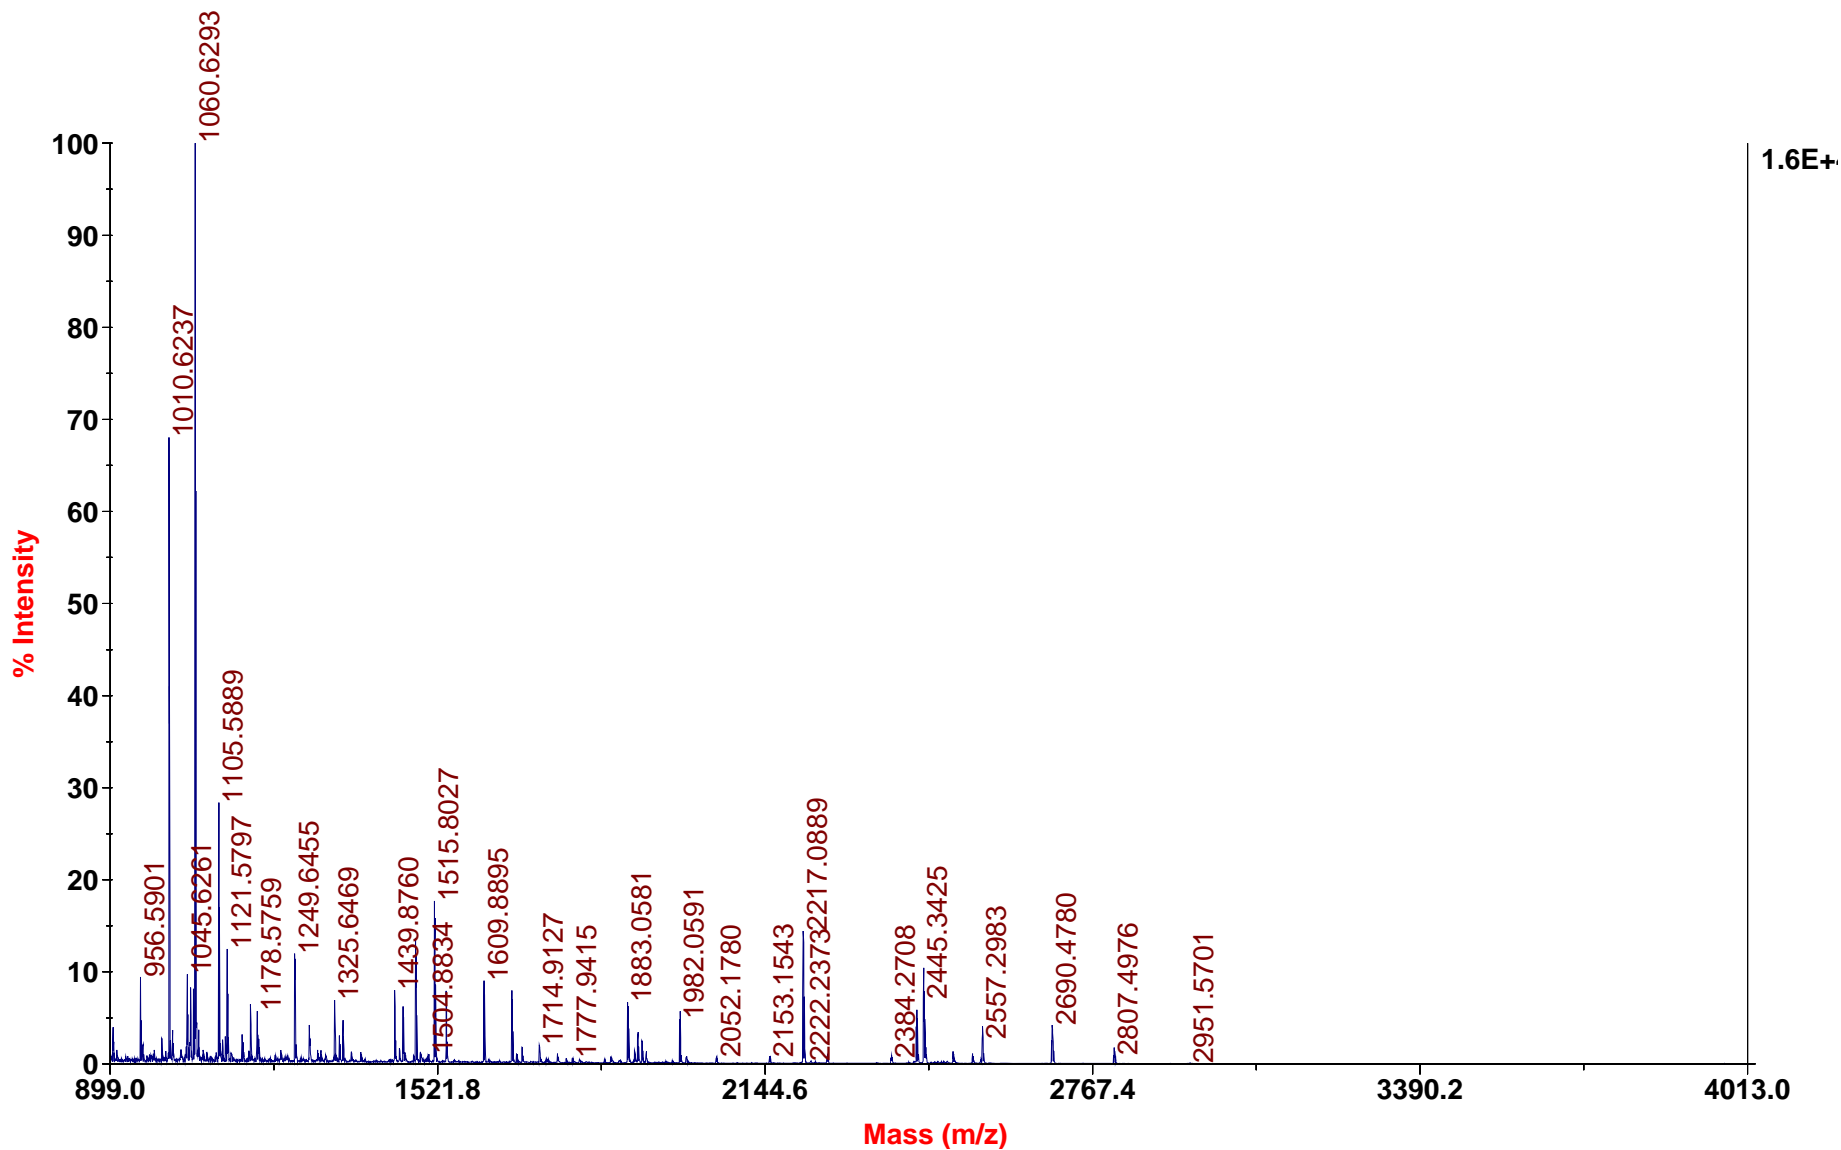

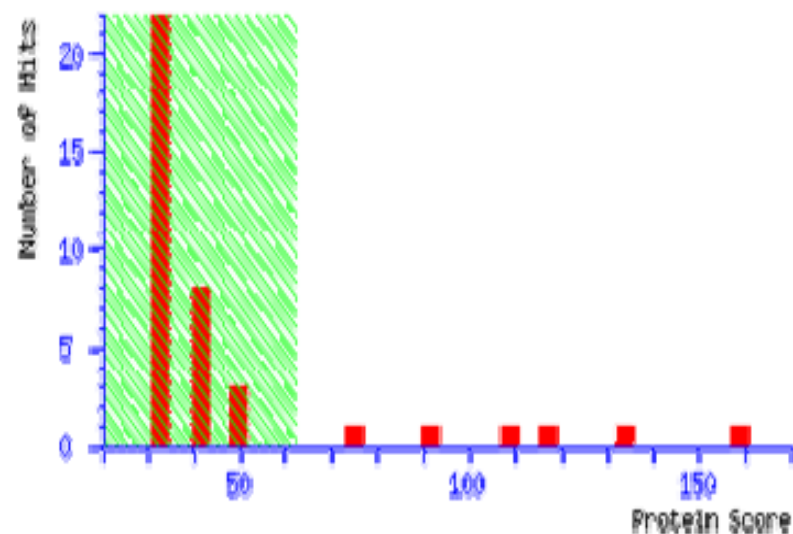

## Concise Protein Summary Report

Format As

Concise Protein Summary

[Help](#)

Significance threshold  $p <$

Max. number of hits

1. **Mixture 1** Total score: **159** Expect: 1.2e-11 Matches: 60

Components (only one family member shown for each component):

[Q8C7C7 MOUSE](#) Mass: 64961 Score: **132** Expect: 5.8e-09 Matches: 36

2 days neonate thymus thymic cells cDNA, RIKEN full-length enriched library, clone:C920028B14 product:albumin 1,

[Q6S9I1 MOUSE](#) Mass: 53172 Score: **86** Expect: 0.00021 Matches: 31

HMW kininogen-I variant (High molecular weight kininogen I isoform DeltaD5).- Mus musculus (Mouse).

## Protein View

Match to: [Q8C7C7\\_MOUSE](#) Score: 132 Expect: 5.8e-09  
2 days neonate thymus thymic cells cDNA, RIKEN full-length enriched library, clone  
Found in search of pmf\_B2\_129990848801.txt

Nominal mass ( $M_r$ ): 64961; Calculated pI value: 5.49

NCBI BLAST search of [Q8C7C7\\_MOUSE](#) against nr  
Unformatted [sequence string](#) for pasting into other applications

Taxonomy: [Mus musculus](#)

Links to retrieve other entries containing this sequence from NCBI Entrez:  
(no taxonomy information for this entry)

Variable modifications: Carbamidomethyl (C), Deamidated (NQ), Oxidation (M)  
Cleavage by Trypsin: cuts C-term side of KR unless next residue is P  
Number of mass values searched: 119  
Number of mass values matched: 36  
Sequence Coverage: 59%

Matched peptides shown in **Bold Red**

```
1  NRYNDLGEQH  FKGLVLIAFS  QYLQKCSYDE  HAKLVQEVTD  FAKTCVADES
51  AANCDKSLHT  LFGDKLCAIP  NLRENYGELA  DCCTKQEPER  NECFLQHKDD
101 NPSLPPFERP  EAEAMCTSEK  ENPTTFMGHY  LHEVARRHPY  FYAPELLYYA
151 EQYNEILTQC  CAEADKESCL  TPKLDGVKEK  ALVSSVRQRM  KCSSMQKFGE
201 RAFKAWAVAR  LSQTFPNADF  AEITKLATDL  TKVNKECCHG  DLLECADDRA
251 ELAKYMCENQ  ATISSKLQTC  CDKPLLKKAH  CLSEVEHDTM  PADLPAIAAD
301 FVEDQEVCKN  YAEAKDVFLG  TFLYEYSRRH  PDYSVSLLLR  LAKKYEATLE
351 KCCAEANPPA  CYGTVLAEFQ  PLVEEPKNLV  KTNCDLYEKL  GEYGFQNAIL
401 VRYTQKAPQV  STPTLVEAAR  NLGRVGTKCC  TLPEDQRLPC  VEDYLSAILN
451 RVCLLHEKTP  VSEHVTKCCS  GSLVERRPCF  SALTVDETYV  PKEFKAETFT
501 FHSDICTLPE  KEKQIKKQTA  LAELVKHKPK  ATAEQLKTVM  DDEFAQFLDTC
551 CKAADKDTCF  STEGPNLVTR  CKDALA
```

Show predicted peptides also

Sort Peptides By

Residue Number  Increasing Mass  Decreasing Mass

| Start | End | Observed  | Mr (expt) | Mr (calc) | ppm | Miss | Sequence              |
|-------|-----|-----------|-----------|-----------|-----|------|-----------------------|
| 13    | 25  | 1479.8933 | 1478.8860 | 1478.8497 | 25  | 0    | K. GLVLIAFS QYLQK. L  |
| 13    | 33  | 2472.3254 | 2471.3181 | 2471.2042 | 46  | 1    | K. GLVLIAFS QYLQKC. L |
| 34    | 43  | 1149.6647 | 1148.6574 | 1148.6077 | 43  | 0    | K. LVQEVTD FAK. T     |
| 57    | 65  | 1017.5847 | 1016.5774 | 1016.5291 | 48  | 0    | K. SLHTLFGDK. L       |
| 66    | 73  | 956.5888  | 955.5815  | 955.5273  | 57  | 0    | K. LCAIPNL R. E Ca    |
| 74    | 85  | 1459.6769 | 1458.6696 | 1458.5755 | 65  | 0    | R. ENYGELADCCTK. Q    |



## Protein View

Match to: [Q6S9I1\\_MOUSE](#) Score: 86 Expect: 0.00021

HMW kininogen-I variant (High molecular weight kininogen I isoform DeltaD5).- Mus musculus  
Found in search of pmf\_B2\_129990848801.txt

Nominal mass ( $M_r$ ): 53172; Calculated pI value: 4.88

NCBI BLAST search of [Q6S9I1\\_MOUSE](#) against nr

Unformatted [sequence string](#) for pasting into other applications

Taxonomy: [Mus musculus](#)

Links to retrieve other entries containing this sequence from NCBI Entrez:

(no taxonomy information for this entry)

(no taxonomy information for this entry)

Variable modifications: Carbamidomethyl (C), Deamidated (NQ), Oxidation (M)

Cleavage by Trypsin: cuts C-term side of KR unless next residue is P

Number of mass values searched: 119

Number of mass values matched: 31

Sequence Coverage: 51%

Matched peptides shown in **Bold Red**

```
1 MKLITLTLCC SGLLLTLTQG EEAQEIDCND EAVFQAVDFS LKQFNPGVKS
51 GNQYMLHRVI EGTKTDGSPT FYSEFKYLIKE GNCSAQSGLA WQDCDFKDAE
101 EAATGECTAT VGKRENEFFI VTQTCKIAFS KAPILKAYFP CIGCVHAIST
151 DSPDLEPVLK HSIEHFNNNT DHSHLFTLRK VKSAHRQVVA GLNFDITYTI
201 VQTNCSKERF PSLHGDCVAL PNGDDGCEGR NLFMDINNKI ANFSQSCTLY
251 SGGDLVEALP KPCPGCPRDI PVDSPELKEV LGHSIAQLNA ENDHPFYKI
301 DTVKKATSQV VAGTKYVIEF IARETKCSKE SNTELAEDCE IKHLGQSLDC
351 NANVYMRPWE NKVVPTVKCQ ALDMTEMARR PPGFSPFRSV TVQETKEGRT
401 DSDFIEDVVA TTPPYDTGAH DDLIPDIHVQ PDSLSFKLIS DFPEATSPKC
451 PGRPWKPASW EDPNTETTEF SDFDLLDALS
```

Show predicted peptides also

Sort Peptides By

Residue Number

Increasing Mass

Decreasing Mass

| Start | End | Observed  | Mr (expt) | Mr (calc) | ppm | Miss | Sequence                      |
|-------|-----|-----------|-----------|-----------|-----|------|-------------------------------|
| 43    | 58  | 1895.0566 | 1894.0493 | 1893.8679 | 96  | 1    | K. <b>QFNPGVKSGNQYMLHR.V</b>  |
| 43    | 58  | 1896.0194 | 1895.0121 | 1894.8519 | 85  | 1    | K. <b>QFNPGVKSGNQYMLHR.V</b>  |
| 50    | 58  | 1105.5889 | 1104.5816 | 1104.5134 | 62  | 0    | K. <b>SGNQYMLHR.V</b>         |
| 50    | 58  | 1121.5780 | 1120.5707 | 1120.5084 | 56  | 0    | K. <b>SGNQYMLHR.V</b> Oxidati |
| 50    | 64  | 1749.7764 | 1748.7691 | 1748.8515 | -47 | 1    | K. <b>SGNQYMLHRVIEGK.T</b> De |
| 65    | 75  | 1249.6459 | 1248.6386 | 1248.5663 | 58  | 0    | K. <b>TDGSPTFYSEFK.Y</b>      |
| 98    | 114 | 1765.9055 | 1764.8982 | 1764.7948 | 59  | 1    | K. <b>DAEEAATGECTATVGKR.E</b> |
| 114   | 126 | 1671.9216 | 1670.9143 | 1670.8086 | 63  | 1    | K. <b>RENEFFIVTQTCK.I</b> Car |
| 115   | 126 | 1459.6769 | 1458.6696 | 1458.6701 | -0  | 0    | R. <b>ENEFFIVTQTCK.I</b> Deam |
| 115   | 126 | 1515.8025 | 1514.7952 | 1514.7075 | 58  | 0    | R. <b>ENEFFIVTQTCK.I</b> Carb |

# M2

4700 MS/MS Precursor 1010.62 Spec #1 MC[BP = 86.1, 1894]

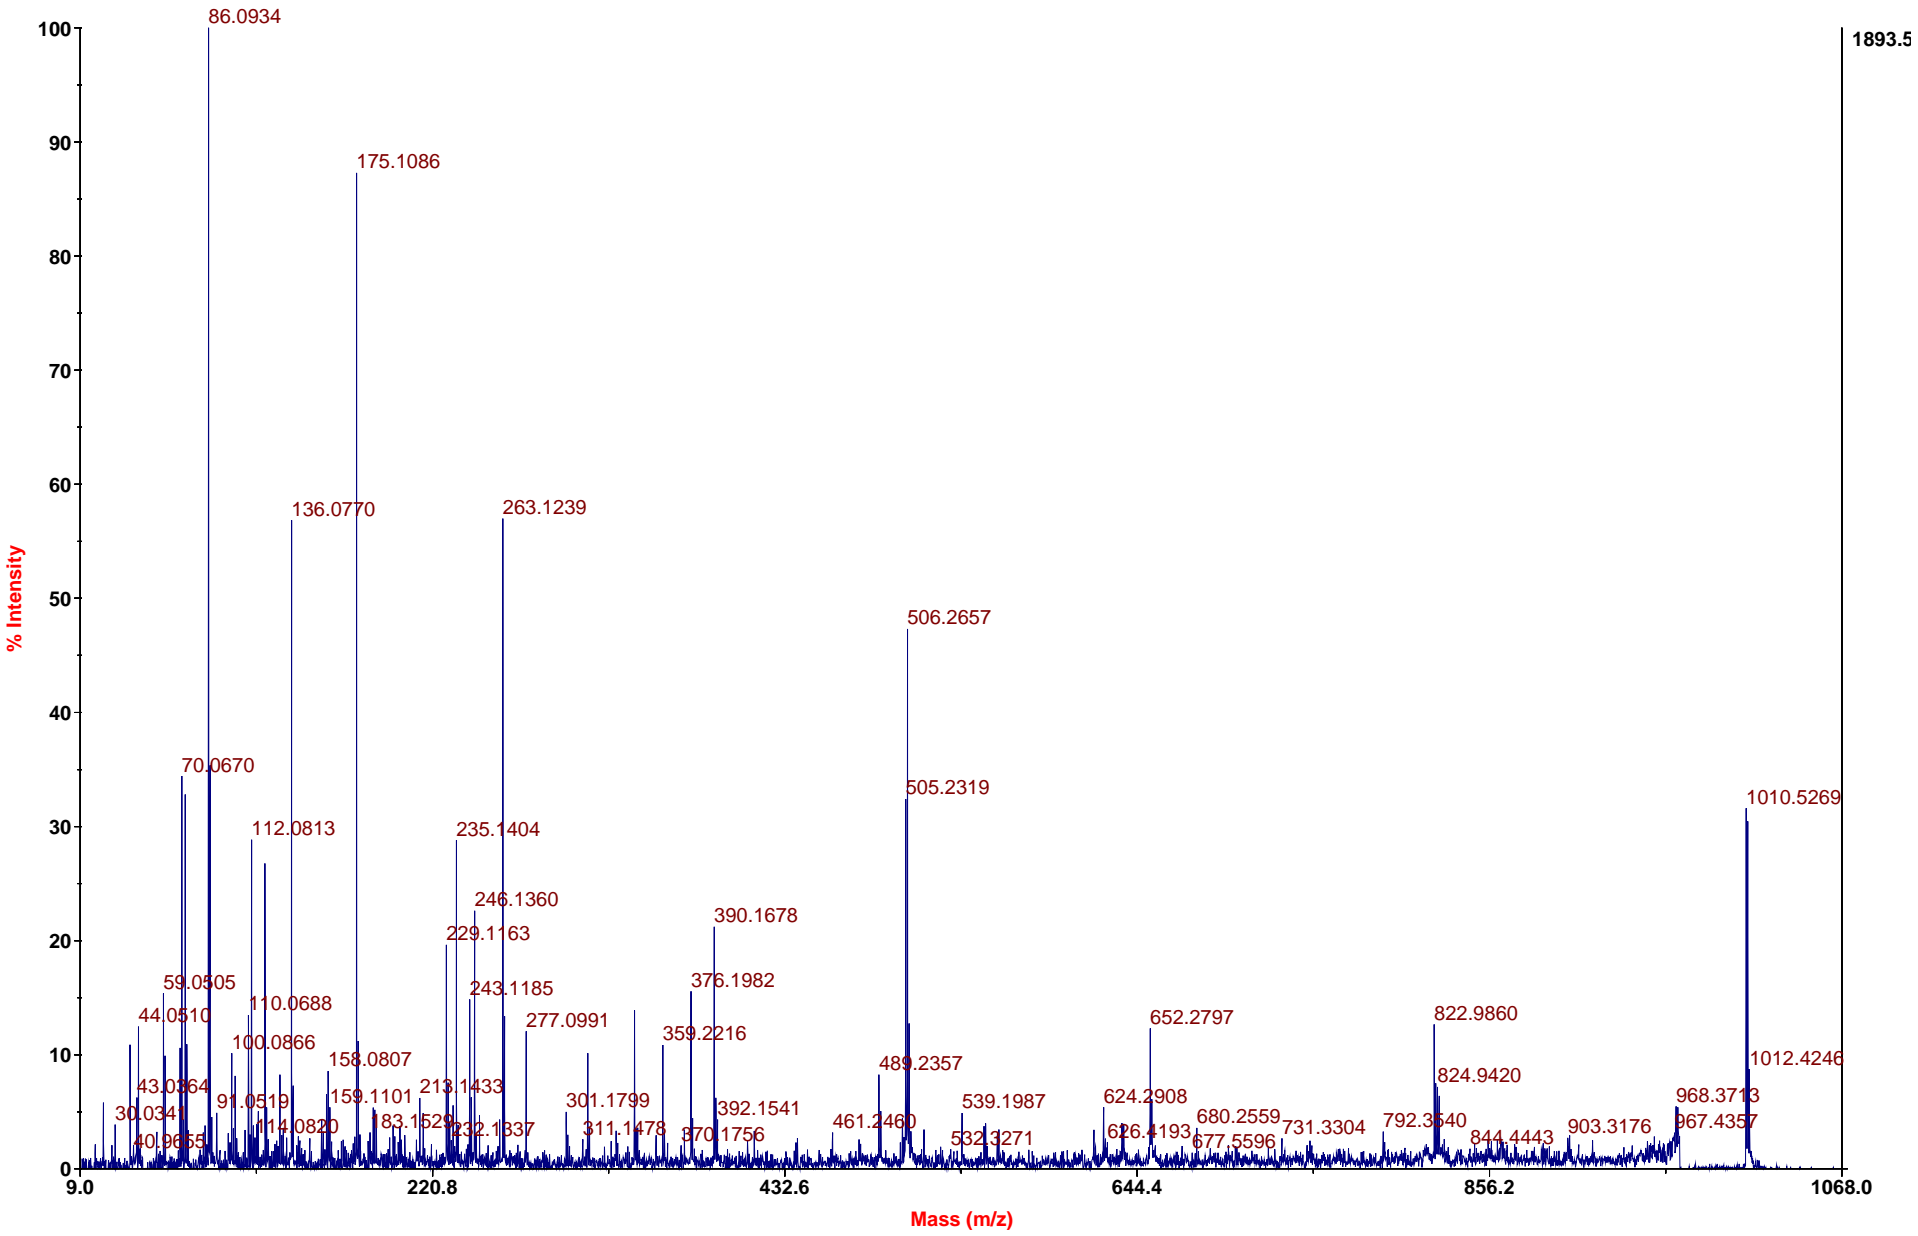



# M2

4700 MS/MS Precursor 1045.63 Spec #1 MC[BP = 860.9, 3406]

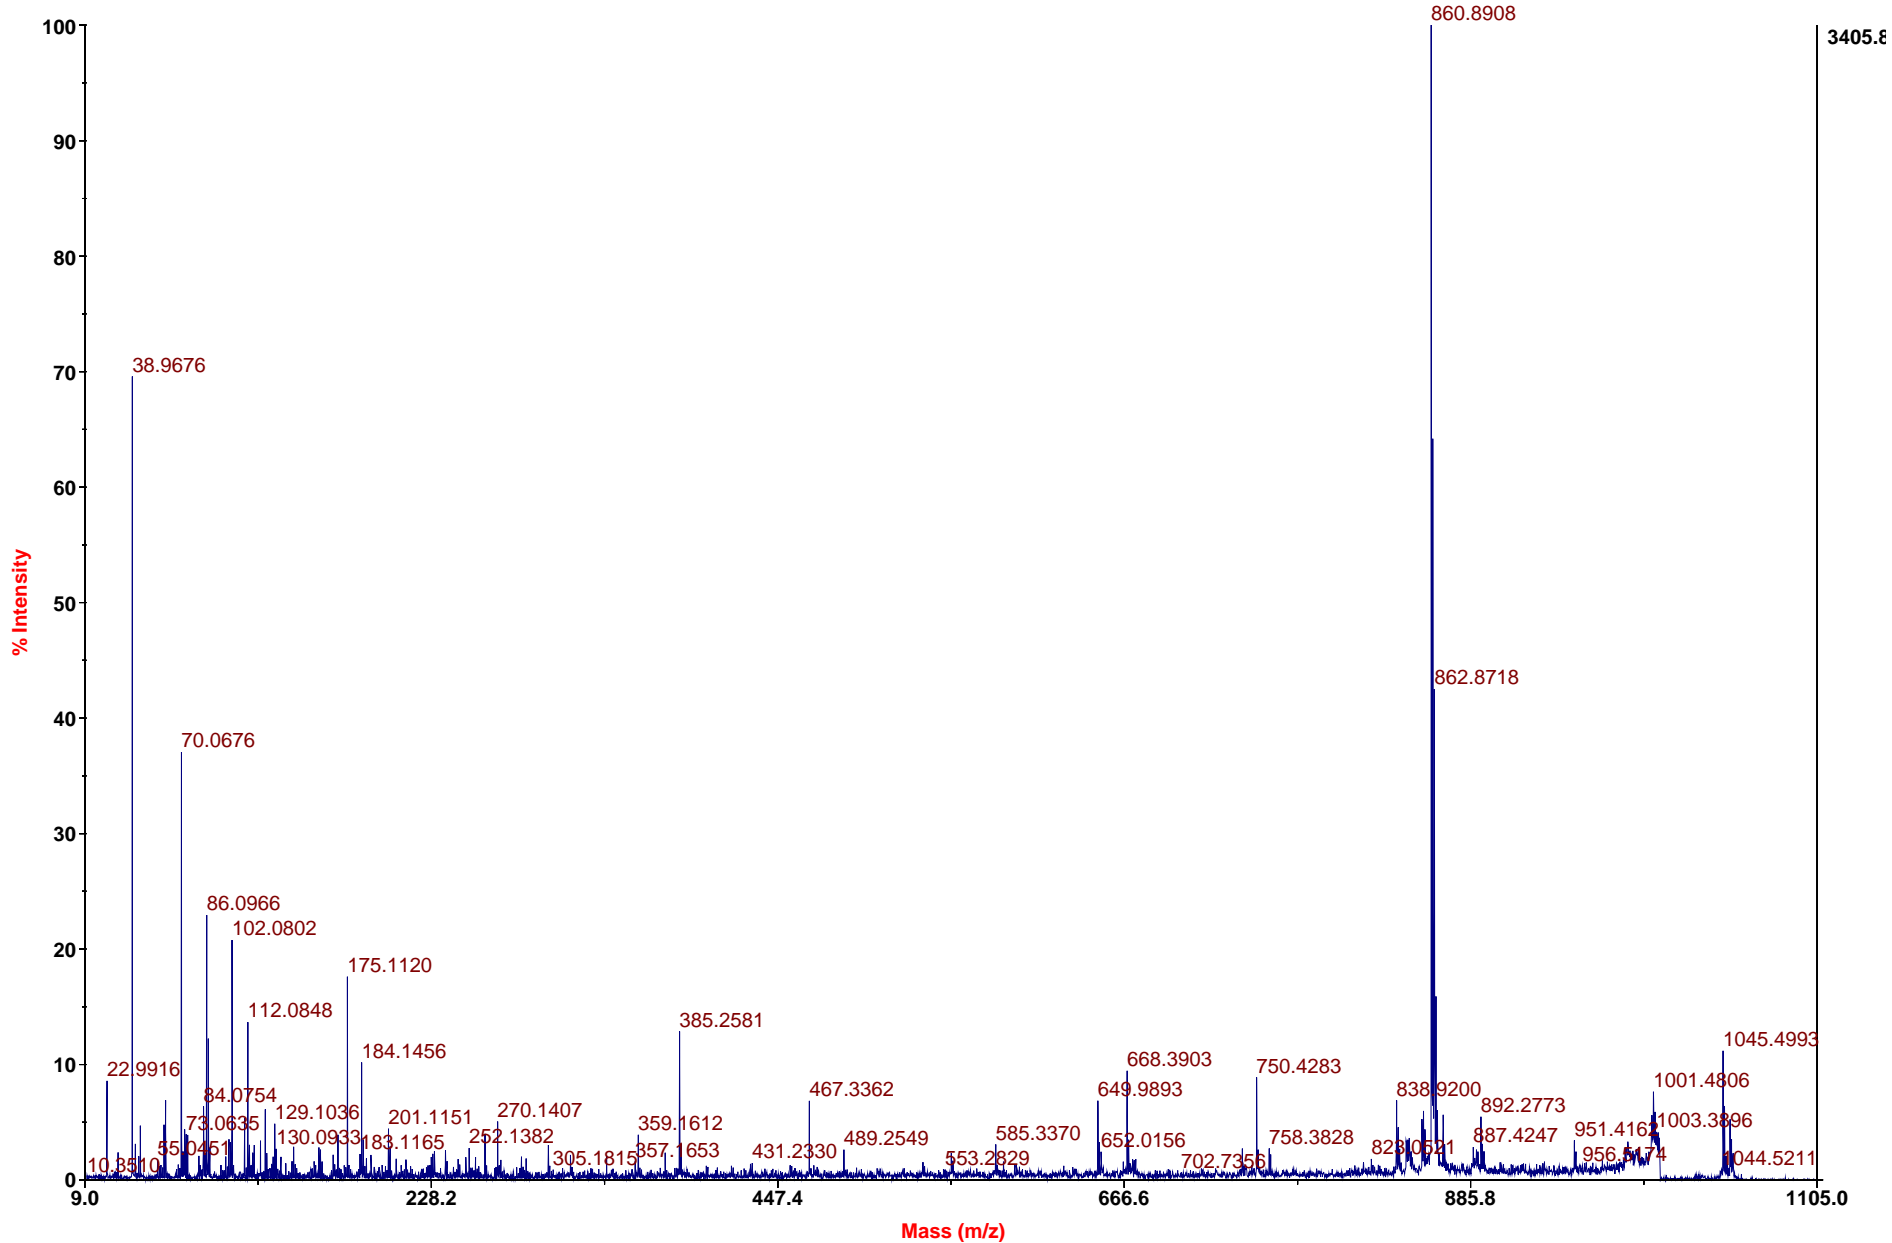

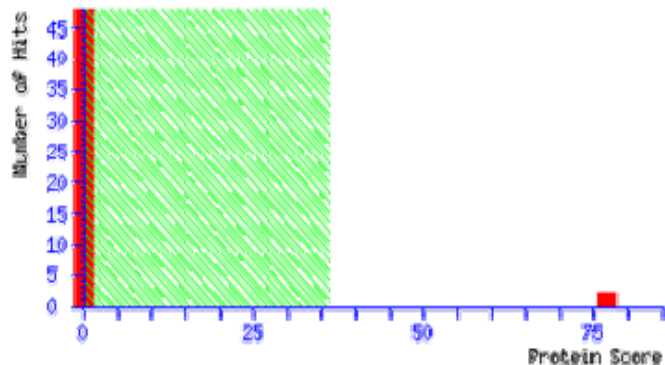

## Peptide Summary Report

Format As Peptide Summary

[Help](#)

Significance threshold  $p < 0.05$  Max. number of hits AUTO

Standard scoring  MudPIT scoring  Ions score or expect cut-off 0 Show sub-sets 0

Show pop-ups  Suppress pop-ups  Sort unassigned Decreasing Score Require bold red

Select All Select None Search Selected  Error tolerant

1. [Q6S9I1 MOUSE](#) Mass: 53172 Score: 77 Matches: 8(1) Sequences: 8(1) emPAI: 0.58  
 HMW kininogen-I variant (High molecular weight kininogen I isoform DeltaD5).- Mus musculus (Mouse).

Check to include this hit in error tolerant search

| Query                                                  | Observed  | Mr(expt)  | Mr(calc)  | ppm  | Miss | Score | Expect  | Rank | Unique | Peptide                                              |
|--------------------------------------------------------|-----------|-----------|-----------|------|------|-------|---------|------|--------|------------------------------------------------------|
| <input checked="" type="checkbox"/> <a href="#">2</a>  | 1010.6234 | 1009.6161 | 1009.5596 | 55.9 | 0    | 29    | 0.1     | 1    | U      | K.YVIEFIAR.E                                         |
| <input checked="" type="checkbox"/> <a href="#">6</a>  | 1105.5889 | 1104.5816 | 1104.5134 | 61.7 | 0    | 12    | 21      | 1    | U      | K.SGNQYMLHR.V                                        |
| <input checked="" type="checkbox"/> <a href="#">8</a>  | 1249.6459 | 1248.6386 | 1248.5663 | 57.9 | 0    | 32    | 0.2     | 1    | U      | K.TDGSPTFYSEK.Y                                      |
| <input checked="" type="checkbox"/> <a href="#">9</a>  | 1325.6459 | 1324.6386 | 1324.5574 | 61.4 | 0    | 26    | 0.94    | 1    | U      | K.CQALDMTEMAR.R + Carbamidomethyl (C)                |
| <input checked="" type="checkbox"/> <a href="#">13</a> | 1515.8025 | 1514.7952 | 1514.7075 | 57.9 | 0    | 32    | 0.2     | 1    | U      | R.ENEFFIVTQTCK.I + Carbamidomethyl (C)               |
| <a href="#">25</a>                                     | 1982.0591 | 1981.0518 | 1980.9319 | 60.6 | 1    | 2     | 1.7e+02 | 9    | U      | K.VVPTVKCQALDMTEMAR.R + Carbamidomethyl (C); Deamid: |
| <input checked="" type="checkbox"/> <a href="#">45</a> | 2216.0903 | 2215.0830 | 2214.9423 | 63.5 | 0    | 61    | 0.00026 | 1    | U      | R.FPSLHGDCVALPNGDDGECR.G + 2 Carbamidomethyl (C)     |
| <input checked="" type="checkbox"/> <a href="#">60</a> | 2432.2815 | 2431.2742 | 2431.1161 | 65.0 | 0    | 8     | 51      | 1    | U      | K.HLGQSLDCNANVYMRPWENK.V + Carbamidomethyl (C)       |

## Protein View

Match to: Q6S9I1\_MOUSE Score: 77

HMW kininogen-I variant (High molecular weight kininogen I isoform DeltaD5) - Mus musculus (Mouse).  
Found in search of ppw\_B2\_129990854101.txt

Nominal mass ( $M_r$ ): 53172; Calculated pI value: 4.88

NCBI BLAST search of [Q6S9I1\\_MOUSE](#) against nr

Unformatted [sequence string](#) for pasting into other applications

Taxonomy: [Mus musculus](#)

Links to retrieve other entries containing this sequence from NCBI Entrez:

(no taxonomy information for this entry)

(no taxonomy information for this entry)

Variable modifications: Carbamidomethyl (C), Deamidated (NQ), Oxidation (M)

Cleavage by Trypsin: cuts C-term side of KR unless next residue is P

Sequence Coverage: 20%

Matched peptides shown in **Bold Red**

```
1 MKLITLTLCC SGLLLTLTQG EEAQEIDCND EAVFQAVDFS LKQFNPGVKS
51 GNQYMLHRVI EGTKTDGSPT FYSFKYLIKE GNCSAQSGLA WQDCDFKDAE
101 EAATGECTAT VGRENEFFI VTQTCKIAPS KAPILKAYFP CIGCVHAIST
151 DSPDLEPVLK HSEHFNNNT DHSHLFTLRK VKSAHRQVVA GLNFDITYTI
201 VQTNCSEKRF PSLHGDCVAL PNGDDGECRG NLFMDINNKI ANFSQSCTLY
251 SGDDLVEALP KPCPGCPRDI PVDSPELKEV LGHSIAQLNA ENDHFPYYKI
301 DTVKKATSQV VAGTKYVIEF IARETKSKE SNTELAEDCE IKHLGQSLDC
351 NANVYMRPWE NKVVPTVKCQ ALDMTEMAR PPGFSPFRSV TVQETKEGRT
401 DSDFIEDVVA TTPPYDTGAH DDLIPDIHVQ PDSLSEFKLIS DFPEATSPKC
451 PGRPWKPASW EDPNTEETEF SDFDLLDALS
```

Show predicted peptides also

Sort Peptides By

Residue Number

Increasing Mass

Decreasing Mass

| start | End | observed  | Mr (expt) | Mr (calc) | ppm | Miss | Sequence                                          |
|-------|-----|-----------|-----------|-----------|-----|------|---------------------------------------------------|
| 50    | 58  | 1105.5889 | 1104.5816 | 1104.5134 | 62  | 0    | K.SGNQYMLHR.V ( <a href="#">Ions score 12</a> )   |
| 65    | 75  | 1249.6459 | 1248.6386 | 1248.5663 | 58  | 0    | K.TDGSPTFYFVK.Y ( <a href="#">Ions score 32</a> ) |
| 115   | 126 | 1515.8025 | 1514.7952 | 1514.7075 | 58  | 0    | R.ENEFFIVTQTCK.I Carbamidomethyl                  |
| 210   | 229 | 2216.0903 | 2215.0830 | 2214.9423 | 64  | 0    | R.FPSLHGDCVALPNGDDGECR.G 2 Carbamidomethyl        |
| 316   | 323 | 1010.6234 | 1009.6161 | 1009.5596 | 56  | 0    | K.YVIEFIAR.E ( <a href="#">Ions score 29</a> )    |
| 343   | 362 | 2432.2815 | 2431.2742 | 2431.1161 | 65  | 0    | K.HLGQSLDCNANVYMRPWENK.V Carbamidomethyl          |
| 363   | 379 | 1982.0591 | 1981.0518 | 1980.9319 | 61  | 1    | K.VVPTVKCQALDMTEMAR.R Carbamidomethyl             |
| 369   | 379 | 1325.6459 | 1324.6386 | 1324.5574 | 61  | 0    | K.CQALDMTEMAR.R Carbamidomethyl                   |

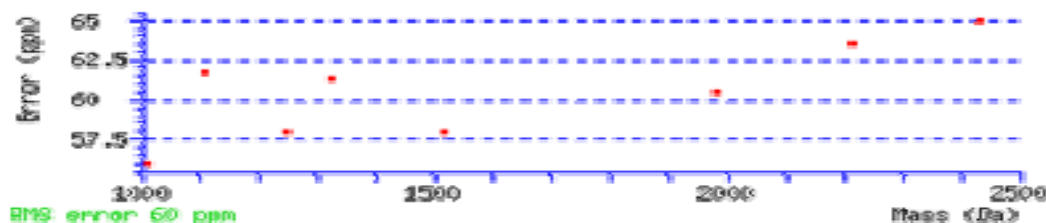

# Sample M3

4700 Reflector Spec #1 MC=>NR(2.00)[BP = 1558.0, 30001]

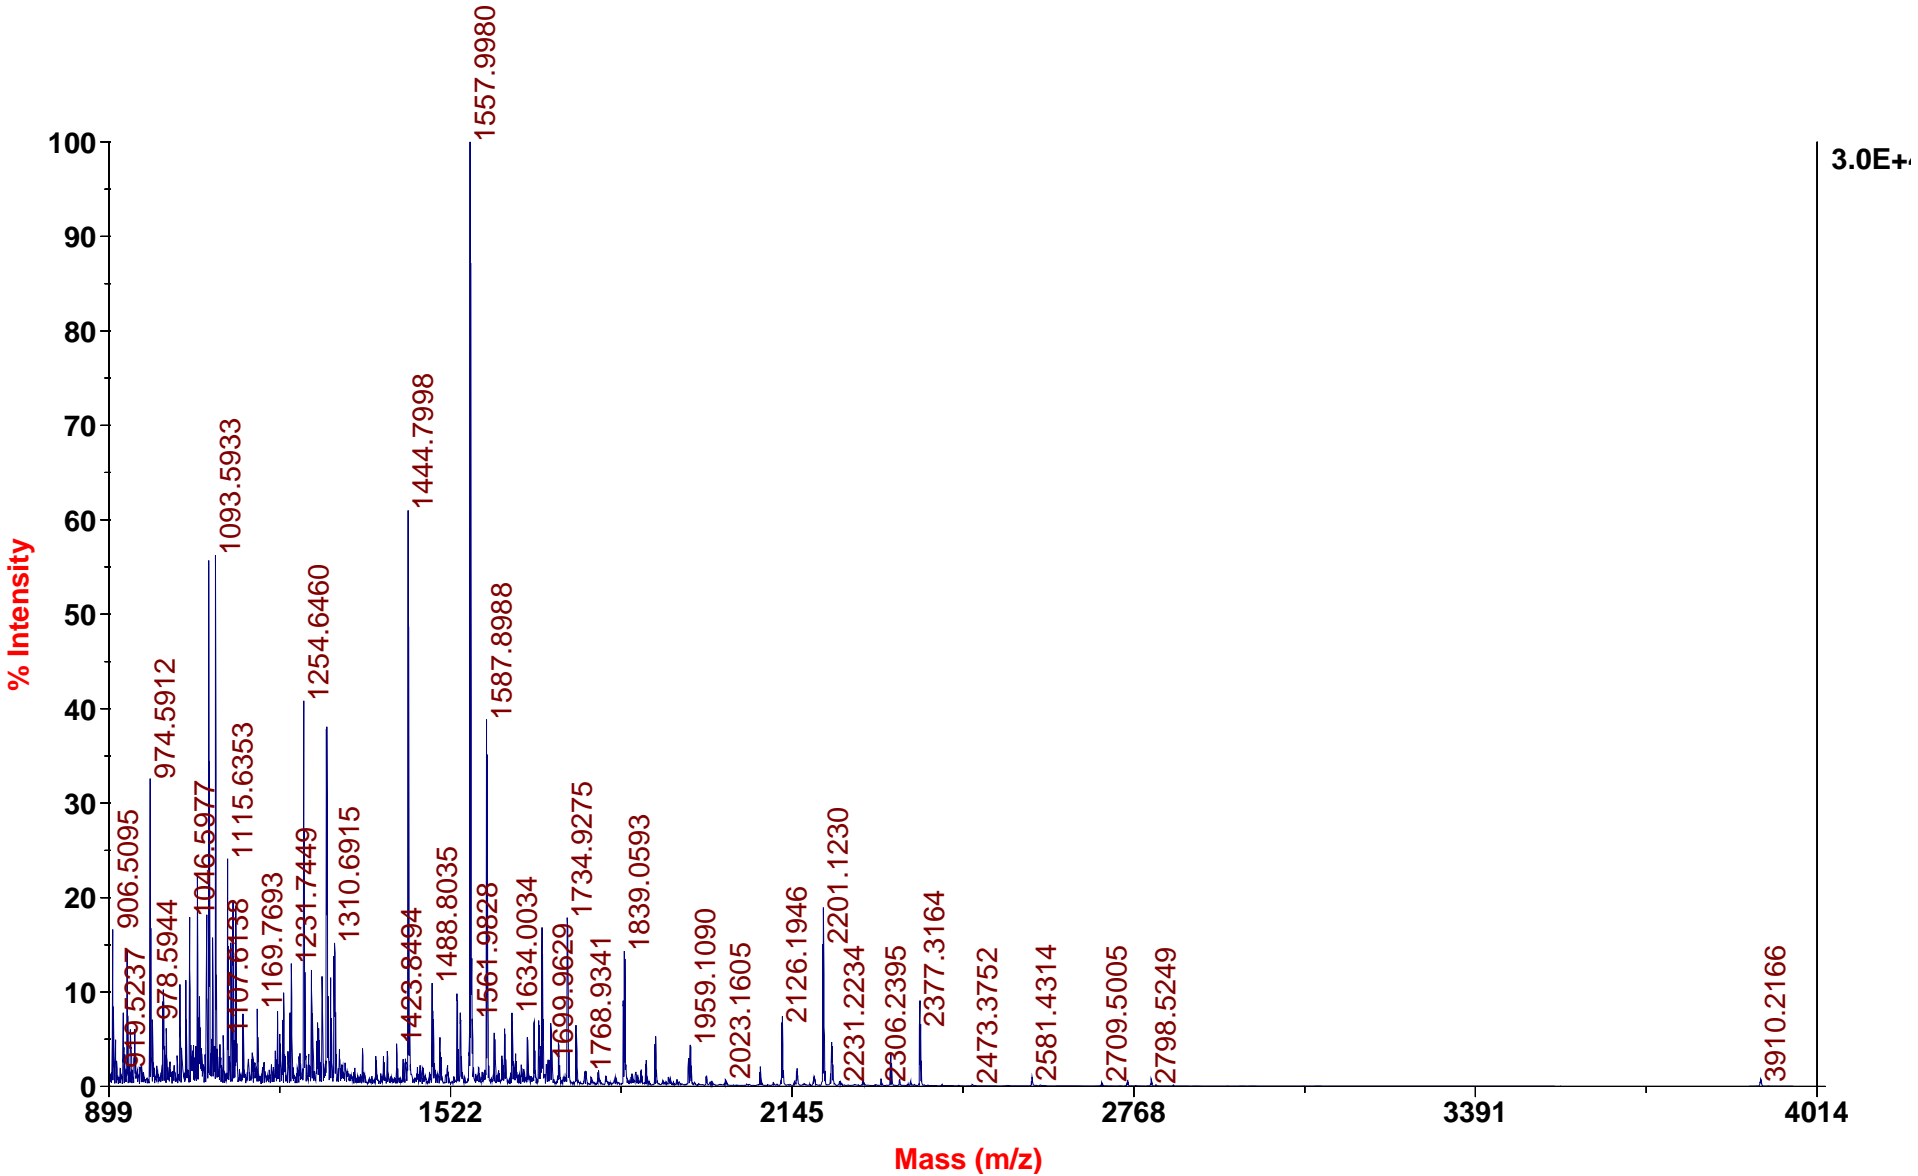

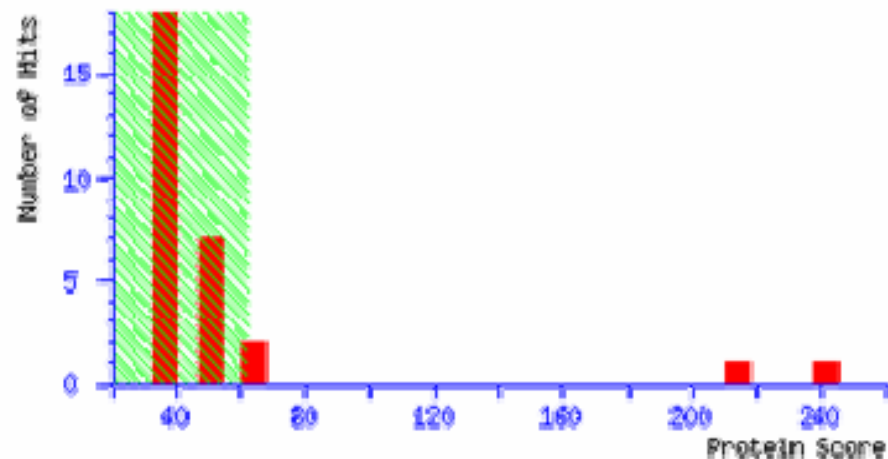

## Concise Protein Summary Report

Format As

Concise Protein Summary

[Help](#)

Significance threshold  $p <$

Max. number of hits

Re-Search All

Search Unmatched

1. [VIME\\_MOUSE](#) Mass: 53524 Score: **241** Expect: 7.3e-20 Matches: 61

Vimentin.- Mus musculus (Mouse).

[Q5FWJ3\\_MOUSE](#) Mass: 53655 Score: **241** Expect: 7.3e-20 Matches: 61

Vimentin (NOD-derived CD11c +ve dendritic cells cDNA, RIKEN full-length enriched library, clone:R

[CAA39807](#) Mass: 53689 Score: **233** Expect: 4.6e-19 Matches: 58

MMVMTM NID: - Mus musculus

[Q3U6S1\\_MOUSE](#) Mass: 53641 Score: **232** Expect: 5.8e-19 Matches: 59

Bone marrow macrophage cDNA, RIKEN full-length enriched library, clone:I830119C09 product:vimentin

[Q3TFD9\\_MOUSE](#) Mass: 53656 Score: **230** Expect: 9.2e-19 Matches: 59

17 days embryo heart cDNA, RIKEN full-length enriched library, clone:I920087013 product:vimentin,

[AAA40555](#) Mass: 53641 Score: **229** Expect: 1.2e-18 Matches: 58

## Protein View

Match to: **VIME\_MOUSE** Score: 241 Expect: 7.3e-20  
Vimentin.- Mus musculus (Mouse).  
Found in search of pmf\_c2\_129990848802.txt

Nominal mass ( $M_r$ ): 53524; Calculated pI value: 5.06  
NCBI BLAST search of [VIME\\_MOUSE](#) against nr  
Unformatted [sequence string](#) for pasting into other applications

Taxonomy: [Mus musculus](#)

Variable modifications: Carbamidomethyl (C), Deamidated (NQ), Oxidation (M)  
Cleavage by Trypsin: cuts C-term side of KR unless next residue is P  
Number of mass values searched: 176  
Number of mass values matched: 61  
Sequence Coverage: 85%

Matched peptides shown in **Bold Red**

```
1 STRSVSSSSY RRMFGGSGTS SRPSSNRSYV TTSTRTYSLG SALRPSTSRs
51 LYSSSPGGAY VTRSSAVRLR SSVPGVRLlQ DSVDFSLADA INTEFKNTRT
101 NEKVELQELN DRFANYIDKV RFLEQQNKIL LAELEQLKGQ GKSRLGDLYE
151 EEMRELRRQV DQLTNDKARV EVERDNLAED IMRLREKLQE EMLQREEAES
201 TLQSFRRQDVD NASLARLDLE RKVESLQEEI AFLKKLHDEE IQELQAQIQE
251 QHVQIDVDVS KPDLTAAALRD VRQQYESVAA KNLQEAEEWY KSKFADLSEA
301 ANRNNDALRQ AKQESNEYRR QVQSLTCEVD ALKGTNESLE RQMREMEENF
351 ALEAANYQDT IGRlQDEIQN MKEEMARHLR EYQDLLNVKM ALDIEIATYR
401 KLEGEESRI SLPLPTFSSL NLRETNLESL PLVDTHSKRT LLIKTVETRD
451 GQVINETSQH HDDLE
```

Show predicted peptides also

Sort Peptides By

Residue Number  Increasing Mass  Decreasing Mass

| Start | End | Observed  | Mr(expt)  | Mr(calc)  | ppm | Miss | Sequence                      |
|-------|-----|-----------|-----------|-----------|-----|------|-------------------------------|
| 4     | 12  | 1028.5881 | 1027.5808 | 1027.5047 | 74  | 1    | R. SVSSSSSYRR. M              |
| 12    | 27  | 1699.9598 | 1698.9525 | 1698.7856 | 98  | 1    | R. RRMFGGSGTSSRPSSNR. S Oxid. |
| 28    | 49  | 2391.3157 | 2390.3084 | 2390.2190 | 37  | 1    | R. SYVTTSTRTYSLGSALRPSTSR. S  |
| 50    | 63  | 1444.7992 | 1443.7919 | 1443.6994 | 64  | 0    | R. SLYSSSPGGAYVTR. S          |
| 78    | 96  | 2126.1914 | 2125.1841 | 2125.0579 | 59  | 0    | R. LLQDSVDFSLADAINTEFK. N     |
| 100   | 112 | 1587.8977 | 1586.8904 | 1586.7900 | 63  | 1    | R. TNEKVELQELNDR. F           |
| 104   | 112 | 1115.6348 | 1114.6275 | 1114.5618 | 59  | 0    | K. VELQELNDR. F               |
| 113   | 121 | 1125.6698 | 1124.6625 | 1124.5978 | 58  | 1    | R. FANYIDKVR. F               |
| 122   | 128 | 906.5101  | 905.5028  | 905.4607  | 47  | 0    | R. FLEQQNK. I                 |
| 129   | 138 | 1169.7720 | 1168.7647 | 1168.7067 | 50  | 0    | K. ILLAELEQLK. G              |
| 129   | 142 | 1540.0029 | 1538.9956 | 1538.9032 | 60  | 1    | K. ILLAELEQLKGQGK. S          |

# M3

4700 MS/MS Precursor 1295.75 Spec #1 MC[BP = 175.1, 1640]

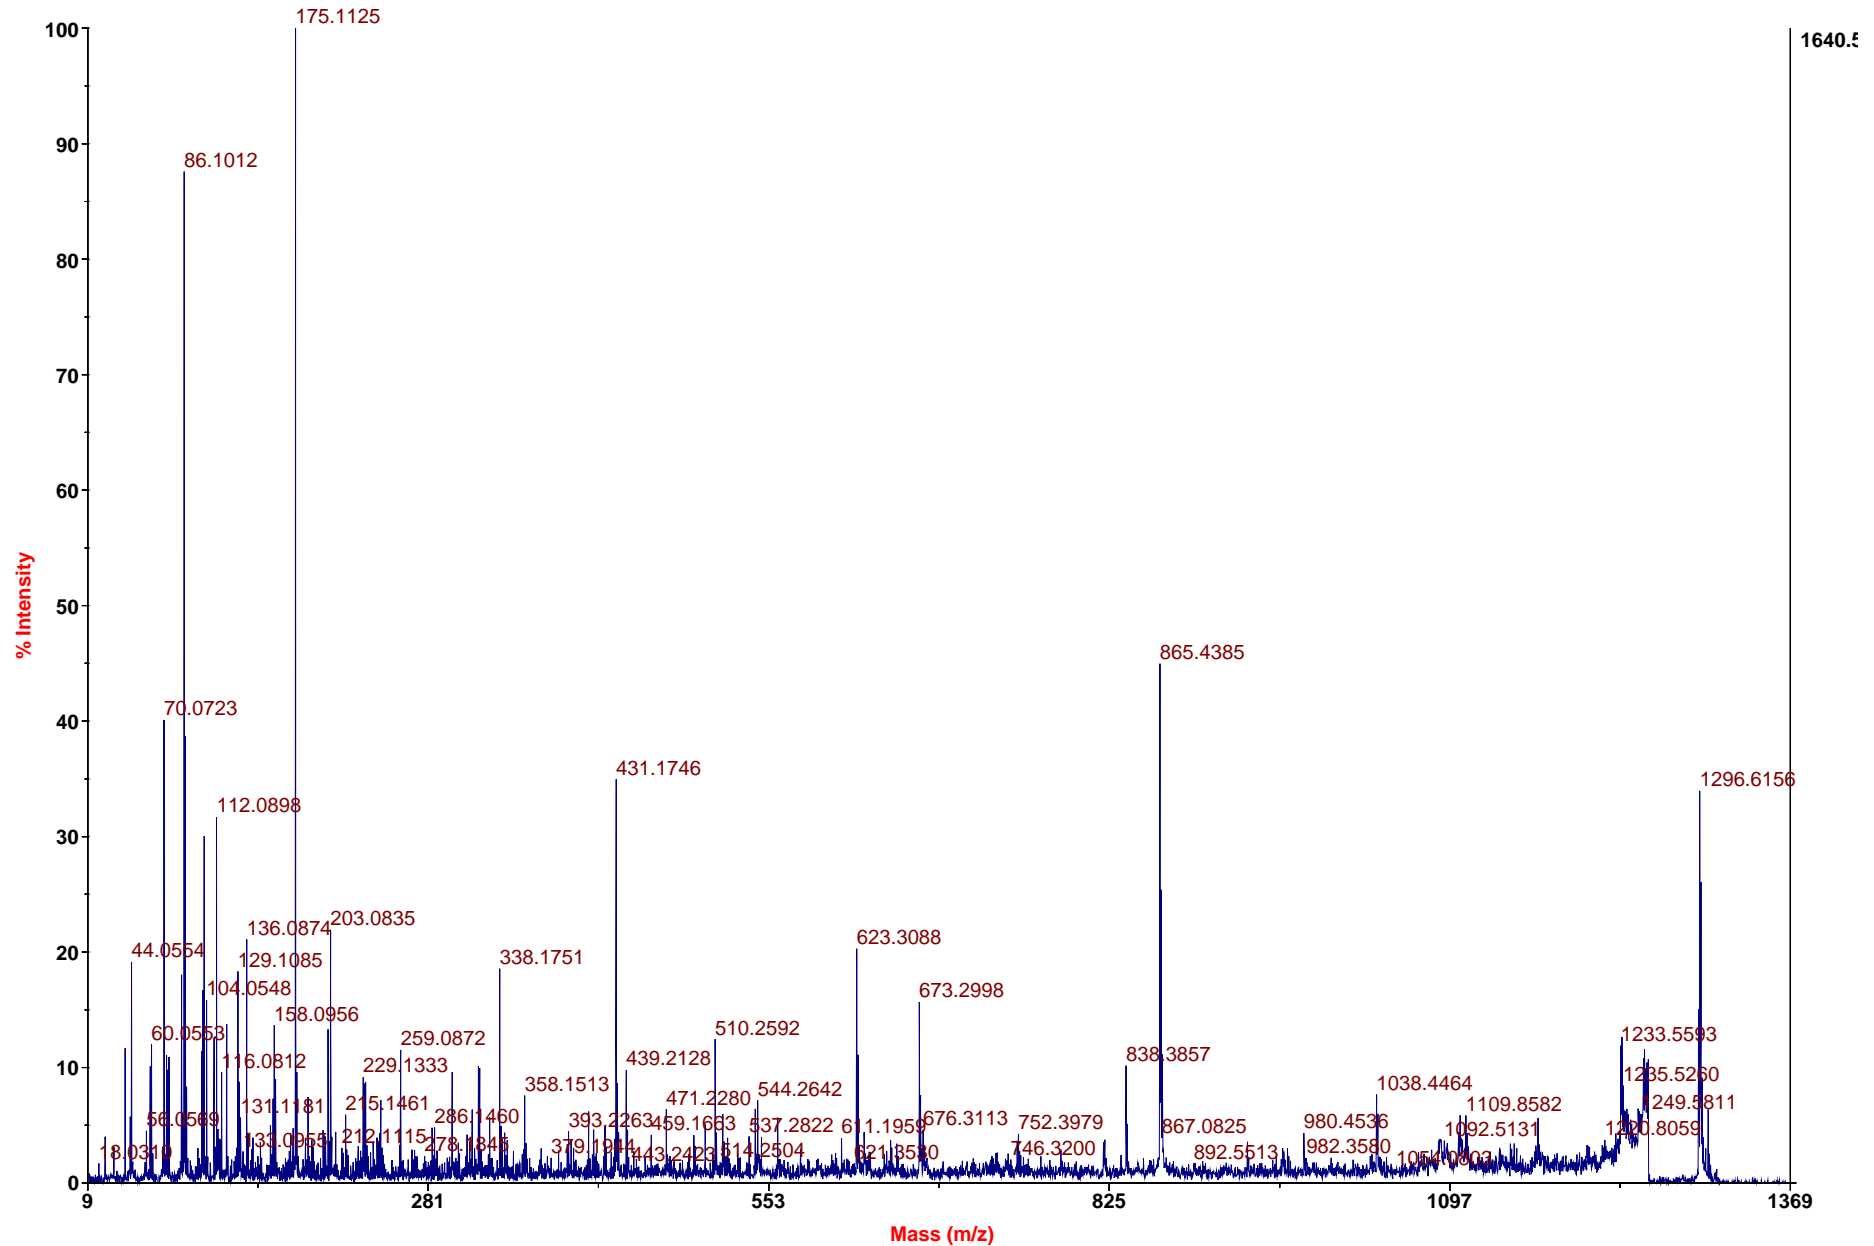

# M3

4700 MS/MS Precursor 2201.12 Spec #1 MC[BP = 446.2, 2614]

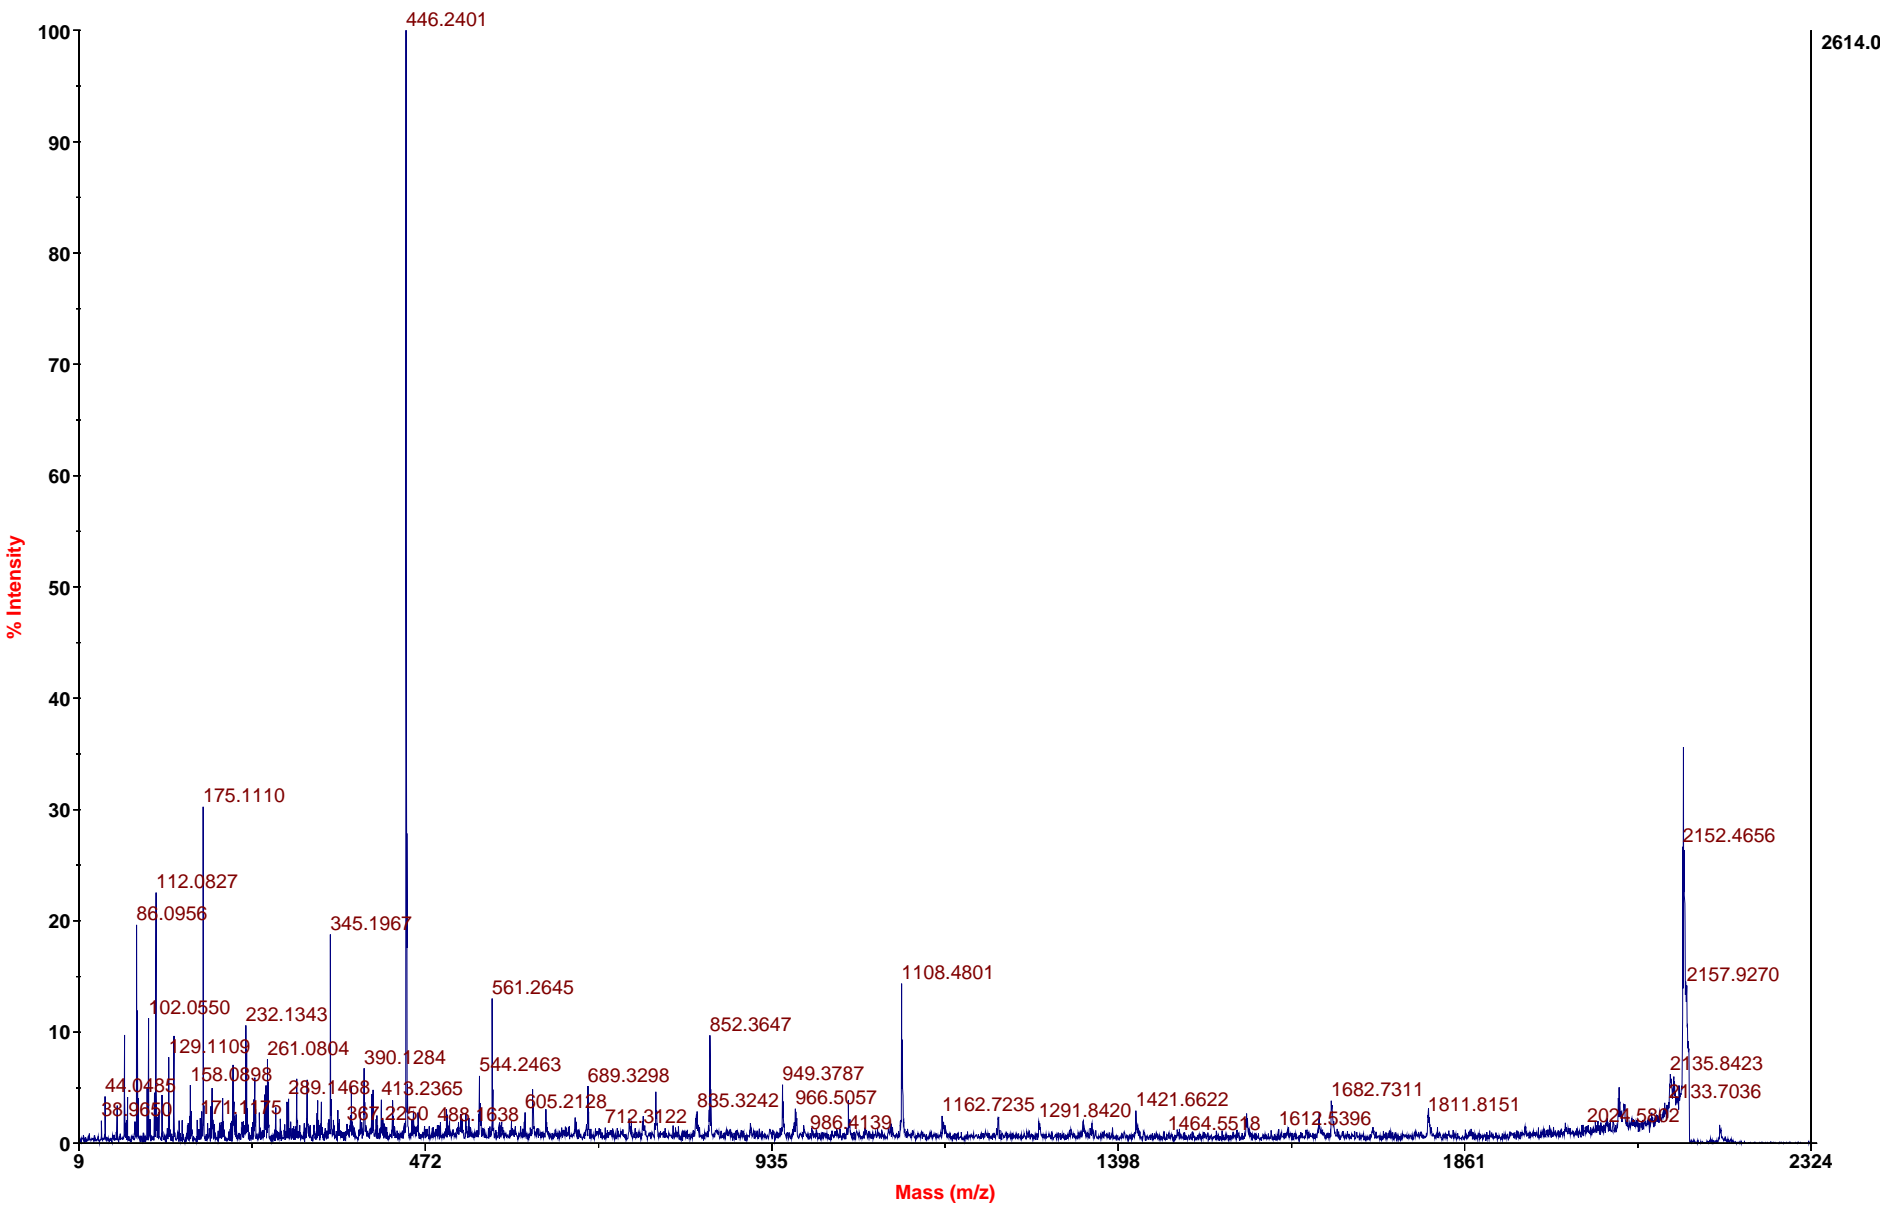



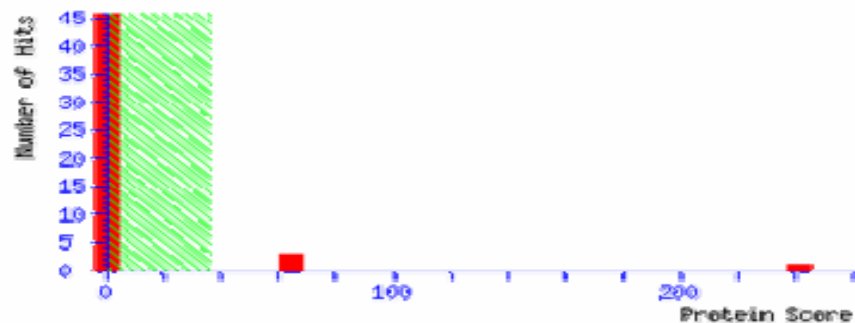

## Peptide Summary Report

Format As

Peptide Summary

[Help](#)

Significance threshold  $p <$

Max. number of hits

Standard scoring  MudPIT scoring

Ions score or expect cut-off

Show sub-sets

Show pop-ups  Suppress pop-ups

Sort unassigned

Require bold red

Error tolerant

1. [VIME\\_MOUSE](#) Mass: 53524 Score: 241 Matches: 15(6) Sequences: 15(6) emPAI: 1.28  
 Vimentin.- Mus musculus (Mouse).

Check to include this hit in error tolerant search

| Query                                                  | Observed  | Mr(expt)  | Mr(calc)  | ppm  | Miss | Score | Expect  | Rank | Unique | Peptide                 |
|--------------------------------------------------------|-----------|-----------|-----------|------|------|-------|---------|------|--------|-------------------------|
| <input checked="" type="checkbox"/> <a href="#">1</a>  | 932.5250  | 931.5177  | 931.4610  | 60.9 | 0    | 37    | 0.071   | 1    |        | K.LLEGEESR.I            |
| <input checked="" type="checkbox"/> <a href="#">4</a>  | 1081.5635 | 1080.5562 | 1080.4948 | 56.9 | 1    | 13    | 12      | 1    | U      | K.QESNEYRR.Q            |
| <input checked="" type="checkbox"/> <a href="#">5</a>  | 1093.5925 | 1092.5852 | 1092.5200 | 59.7 | 0    | 44    | 0.011   | 1    | U      | K.FADLSEAANR.N          |
| <input checked="" type="checkbox"/> <a href="#">6</a>  | 1115.6348 | 1114.6275 | 1114.5618 | 58.9 | 0    | 30    | 0.29    | 1    |        | K.VELQELNDR.F           |
| <input checked="" type="checkbox"/> <a href="#">7</a>  | 1125.6698 | 1124.6625 | 1124.5978 | 57.5 | 1    | 27    | 0.32    | 1    | U      | R.FANYIDKVR.F           |
| <input checked="" type="checkbox"/> <a href="#">9</a>  | 1254.6456 | 1253.6383 | 1253.5598 | 62.7 | 0    | 58    | 0.0005  | 1    | U      | R.LGDLYEEEMR.E          |
| <input checked="" type="checkbox"/> <a href="#">11</a> | 1287.7448 | 1286.7375 | 1286.6579 | 61.9 | 1    | 11    | 20      | 1    | U      | R.QVDQLTNDKAR.V         |
| <input checked="" type="checkbox"/> <a href="#">12</a> | 1295.7462 | 1294.7389 | 1294.6591 | 61.7 | 0    | 33    | 0.09    | 1    | U      | K.MALDIEIATYR.K         |
| <input checked="" type="checkbox"/> <a href="#">13</a> | 1309.6862 | 1308.6789 | 1308.5986 | 61.4 | 0    | 32    | 0.16    | 1    | U      | K.NLQEAEWYK.S           |
| <input checked="" type="checkbox"/> <a href="#">14</a> | 1444.7992 | 1443.7919 | 1443.6994 | 64.1 | 0    | 29    | 0.29    | 1    | U      | R.SLYSSSPGGAYVTR.S      |
| <input checked="" type="checkbox"/> <a href="#">16</a> | 1557.9950 | 1556.9877 | 1556.8926 | 61.1 | 0    | 56    | 0.00014 | 1    | U      | R.ISLPLPTFSSLNLR.E      |
| <input checked="" type="checkbox"/> <a href="#">17</a> | 1587.8977 | 1586.8904 | 1586.7900 | 63.3 | 1    | 66    | 6.7e-05 | 1    |        | R.TNEKVELQELNDR.F       |
| <input checked="" type="checkbox"/> <a href="#">18</a> | 1688.9358 | 1687.9285 | 1687.8199 | 64.4 | 1    | 23    | 1.5     | 1    | U      | R.VEVERDNLAEDIMR.L      |
| <input checked="" type="checkbox"/> <a href="#">19</a> | 1734.9248 | 1733.9175 | 1733.8076 | 63.4 | 1    | 69    | 4e-05   | 1    | U      | R.LQDEIQNMKEEMAR.H      |
| <input checked="" type="checkbox"/> <a href="#">57</a> | 2201.1191 | 2200.1118 | 2199.9742 | 62.6 | 0    | 87    | 6.8e-07 | 1    | U      | R.EMEENFALEAANYQDTIGR.L |

## Protein View

Match to: **VIME\_MOUSE** Score: 241  
**Vimentin.- Mus musculus (Mouse)**.  
Found in search of ppw\_C2\_129990854302.txt

Nominal mass (M<sub>r</sub>): 53524; Calculated pI value: 5.06  
NCBI BLAST search of [VIME\\_MOUSE](#) against nr  
Unformatted [sequence string](#) for pasting into other applications

Taxonomy: [Mus musculus](#)

Variable modifications: Carbamidomethyl (C), Deamidated (NQ), Oxidation (M)  
Cleavage by Trypsin: cuts C-term side of KR unless next residue is P  
Sequence Coverage: 35%

Matched peptides shown in **Bold Red**

```
1 STRSVSSSSY RRMFGGSGIS SRPSSNRSYV TTSTRIYSLG SALRPSTSRS
51 LYSSSPGGAY VTRSSAVRLR SSVFPGVRLQ DSVDFSLADA INTEFKNTRT
101 NEKVELQELN DRFFANYIDKV RFLEQQNKIL LAELEQLKGQ GKSRLGDLYE
151 EEMRELRRQV DQLTNDKARV EVERDNLAED IMRLREKLQE EMLQREEAES
201 TLQSFRQDVD NASLARLDLE RKVESLQEEI AFLKKLHDEE IQELQAQIQE
251 QHVQIDVDVS KPDLTAALRD VRQQYESVAA KNLQEAEEWY KSKFADLSEA
301 ANRNNDALRQ AKQESNEYRR QVQSLTCEVD ALKGTNESLE RQMREMEENF
351 ALEAANYQDT IGRLQDEIQN MKEEMARHLR EYQDLLNVKM ALDIEIATYR
401 KLLEGEESRI SLPLPTFSSL NLRETNLESL PLVDTHSKRT LLIKTVETRD
451 GQVINETSQH HDDLE
```

Show predicted peptides also

Sort Peptides By

Residue Number  Increasing Mass  Decreasing Mass

| Start | End | Observed  | Mr (expt) | Mr (calc) | ppm | Miss | Sequence                                                         |
|-------|-----|-----------|-----------|-----------|-----|------|------------------------------------------------------------------|
| 50    | 63  | 1444.7992 | 1443.7919 | 1443.6994 | 64  | 0    | <b>R.SLYSSSPGGAYVTR.S</b> ( <a href="#">Ions score 29</a> )      |
| 100   | 112 | 1587.8977 | 1586.8904 | 1586.7900 | 63  | 1    | <b>R.TNEKVELQELNDR.F</b> ( <a href="#">Ions score 66</a> )       |
| 104   | 112 | 1115.6348 | 1114.6275 | 1114.5618 | 59  | 0    | <b>K.VELQELNDR.F</b> ( <a href="#">Ions score 30</a> )           |
| 113   | 121 | 1125.6698 | 1124.6625 | 1124.5978 | 58  | 1    | <b>R.FANYIDKVR.F</b> ( <a href="#">Ions score 27</a> )           |
| 145   | 154 | 1254.6456 | 1253.6383 | 1253.5598 | 63  | 0    | <b>R.LGDLYEEEMR.E</b> ( <a href="#">Ions score 58</a> )          |
| 159   | 169 | 1287.7448 | 1286.7375 | 1286.6579 | 62  | 1    | <b>R.QVDQLTNDKAR.V</b> ( <a href="#">Ions score 11</a> )         |
| 170   | 183 | 1688.9358 | 1687.9285 | 1687.8199 | 64  | 1    | <b>R.VEVERDNLAEDIMR.L</b> ( <a href="#">Ions score 23</a> )      |
| 282   | 291 | 1309.6862 | 1308.6789 | 1308.5986 | 61  | 0    | <b>K.NLQEAEEWYK.S</b> ( <a href="#">Ions score 32</a> )          |
| 294   | 303 | 1093.5925 | 1092.5852 | 1092.5200 | 60  | 0    | <b>K.FADLSEAANR.N</b> ( <a href="#">Ions score 44</a> )          |
| 313   | 320 | 1081.5635 | 1080.5562 | 1080.4948 | 57  | 1    | <b>K.QESNEYRR.Q</b> ( <a href="#">Ions score 13</a> )            |
| 345   | 363 | 2201.1191 | 2200.1118 | 2199.9742 | 63  | 0    | <b>R.EMEENFALEAANYQDTIGR.L</b> ( <a href="#">Ions score 30</a> ) |
| 364   | 377 | 1734.9248 | 1733.9175 | 1733.8076 | 63  | 1    | <b>R.LQDEIQNMKEEMAR.H</b> ( <a href="#">Ions score 69</a> )      |
| 390   | 400 | 1295.7462 | 1294.7389 | 1294.6591 | 62  | 0    | <b>K.MALDIEIATYR.K</b> ( <a href="#">Ions score 33</a> )         |
| 402   | 409 | 932.5250  | 931.5177  | 931.4610  | 61  | 0    | <b>K.LLEGEESR.I</b> ( <a href="#">Ions score 37</a> )            |
| 410   | 423 | 1557.9950 | 1556.9877 | 1556.8926 | 61  | 0    | <b>R.ISLPLPTFSSLNLR.E</b> ( <a href="#">Ions score 56</a> )      |

# Sample M4

4700 Reflector Spec #1 MC=>NR(2.00)=>NR(2.00)[BP = 1060.6, 21103]

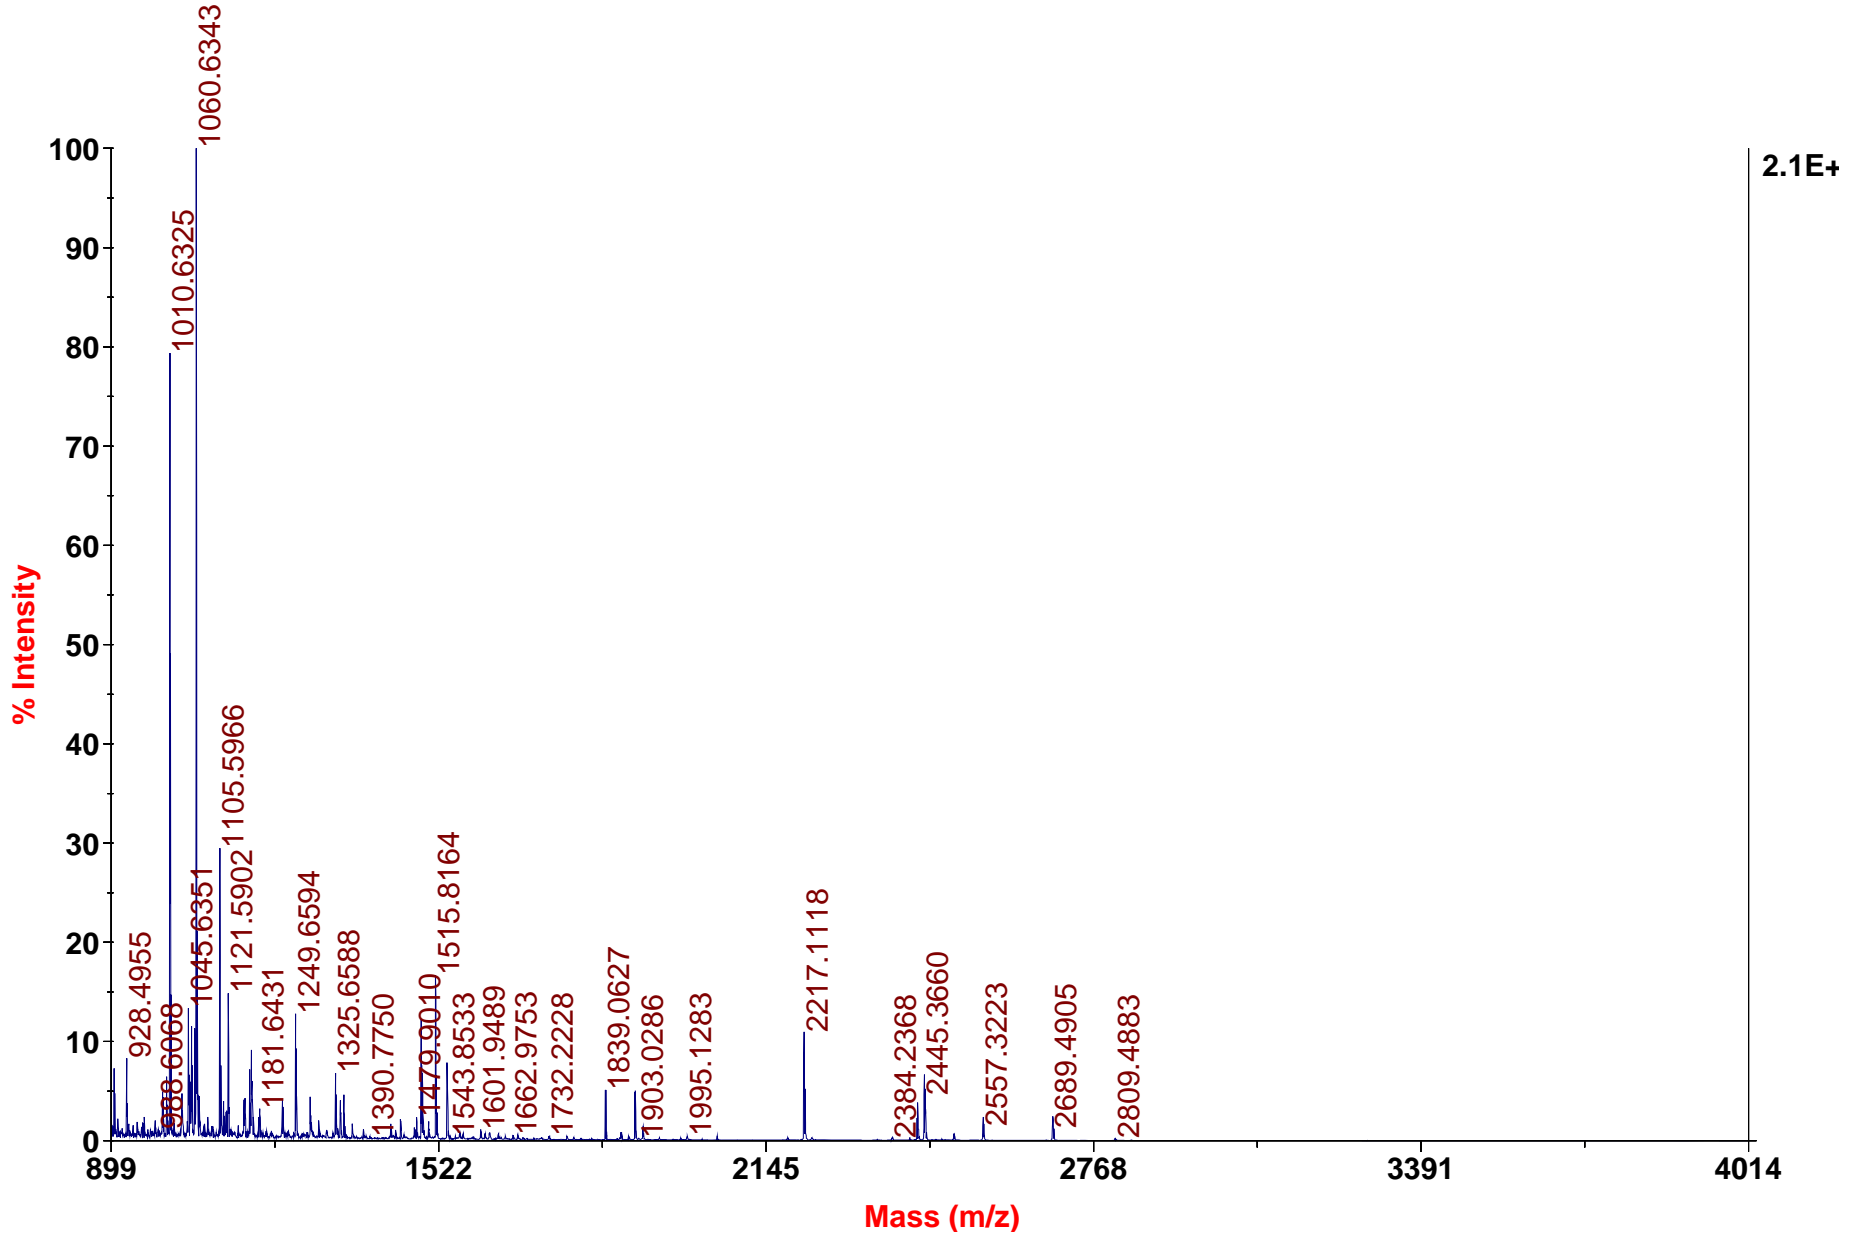

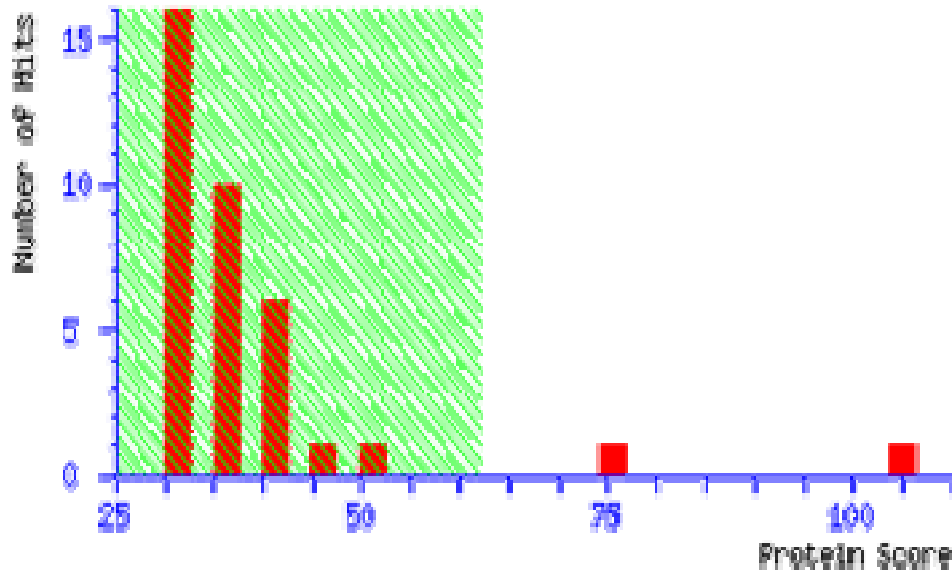

## Concise Protein Summary Report

Format As

Concise Protein Summary

[Help](#)

Significance threshold  $p <$

Max. number of hits

- [AAH18158](#)    **Mass:** 47868    **Score:** 105    **Expect:** 2.9e-06    **Matches:** 28  
 BC018158 NID: - Mus musculus

[O6S9I1 MOUSE](#)    **Mass:** 53172    **Score:** 94    **Expect:** 3.9e-05    **Matches:** 27  
 HMW kininogen-I variant (High molecular weight kininogen I isoform DeltaD5).- Mus musci

## Protein View

Match to: **AAH18158** Score: 105 Expect: 2.9e-06  
BC018158 NID: - **Mus musculus**  
Found in search of pmf\_D2\_129990848803.txt

Nominal mass ( $M_r$ ): **47868**; Calculated pI value: **5.74**  
NCBI BLAST search of [AAH18158](#) against nr  
Unformatted [sequence string](#) for pasting into other applications

Taxonomy: [Mus musculus](#)  
Links to retrieve other entries containing this sequence from NCBI Entrez:  
(no taxonomy information for this entry)

Variable modifications: Carbamidomethyl (C), Deamidated (NQ), Oxidation (M)  
Cleavage by Trypsin: cuts C-term side of KR unless next residue is P  
Number of mass values searched: 147  
Number of mass values matched: 28  
Sequence Coverage: 56%

Matched peptides shown in **Bold Red**

```
1 MKLITLLLC SGLLLTLTQG EEAQEIDCND EAVFQAVDFS LKQFNPGVKS
51 GNQYMLHRVI EGTKTDGSPT FYSEFKYLIKE GNCSAQSGLA WQDCDFKDAE
101 EAATGECTAT VGKRENEFFI VTQTCKIAPS KAPILKAYFP CIGCVHAIST
151 DSPDLEPVLK HSIEHFNNNT DHSHLFTLRK VKSAHRQVVA GLNFDITYTI
201 VQTNCSEKERF PSLHGDCVAL PNGDDGECRG NLFMDINNKI ANFSQSCTLY
251 SGDDLVEALP KPCPGCPRDI PVDSPELKEV LGHSIAQLNA ENDHFPYYKI
301 DTVKKATSQV VAGTKYVIEF IARETKCSKE SNTELAEDCE IKHLGQSLDC
351 NANVYMRPWE NKVVPTVKCQ ALDMTEMARR PPGFSPFRSV TVQETKEGRT
401 RLLRACEYKG RLSKAGAEPA PERQAESSQV KQ
```

Show predicted peptides also

Sort Peptides By

Residue Number  Increasing Mass  Decreasing Mass

| Start | End | Observed  | Mr(expt)  | Mr(calc)  | ppm | Miss | Sequence                                  |
|-------|-----|-----------|-----------|-----------|-----|------|-------------------------------------------|
| 50    | 58  | 1105.5961 | 1104.5888 | 1104.5134 | 68  | 0    | <b>K.SGNQYMLHR.V</b>                      |
| 50    | 58  | 1121.5890 | 1120.5817 | 1120.5084 | 65  | 0    | <b>K.SGNQYMLHR.V</b> Oxidation (M)        |
| 65    | 75  | 1249.6566 | 1248.6493 | 1248.5663 | 67  | 0    | <b>K.TDGSPTFYSEK.Y</b>                    |
| 98    | 114 | 1765.9282 | 1764.9209 | 1764.7948 | 71  | 1    | <b>K.DAE<b>EAATGECTAT</b>VGKR.E</b> Carba |
| 114   | 126 | 1671.9396 | 1670.9323 | 1670.8086 | 74  | 1    | <b>K.RENEFFIVTQTCK.I</b> Carbamido        |
| 115   | 126 | 1515.8158 | 1514.8085 | 1514.7075 | 67  | 0    | <b>R.ENEFFIVTQTCK.I</b> Carbamido         |
| 137   | 160 | 2689.4998 | 2688.4925 | 2688.2928 | 74  | 0    | <b>K.AYFPCIGCVHAISTDSPDLEPVLK.E</b>       |
| 161   | 180 | 2449.3303 | 2448.3230 | 2448.1570 | 68  | 1    | <b>K.HSIEHFNNNTDHSHLFTLRK.V</b> 2         |
| 208   | 229 | 2501.2832 | 2500.2759 | 2500.0860 | 76  | 1    | <b>K.ERF<b>PSLHGDCVAL</b>PNGDDGECR.G</b>  |
| 208   | 229 | 2502.2778 | 2501.2705 | 2501.0700 | 80  | 1    | <b>K.ERF<b>PSLHGDCVAL</b>PNGDDGECR.G</b>  |
| 210   | 229 | 2216.1101 | 2215.1028 | 2214.9423 | 72  | 0    | <b>R.F<b>PSLHGDCVAL</b>PNGDDGECR.G</b> 2  |

# M4

4700 MS/MS Precursor 1045.63 Spec #1 MC[BP = 860.9, 1921]

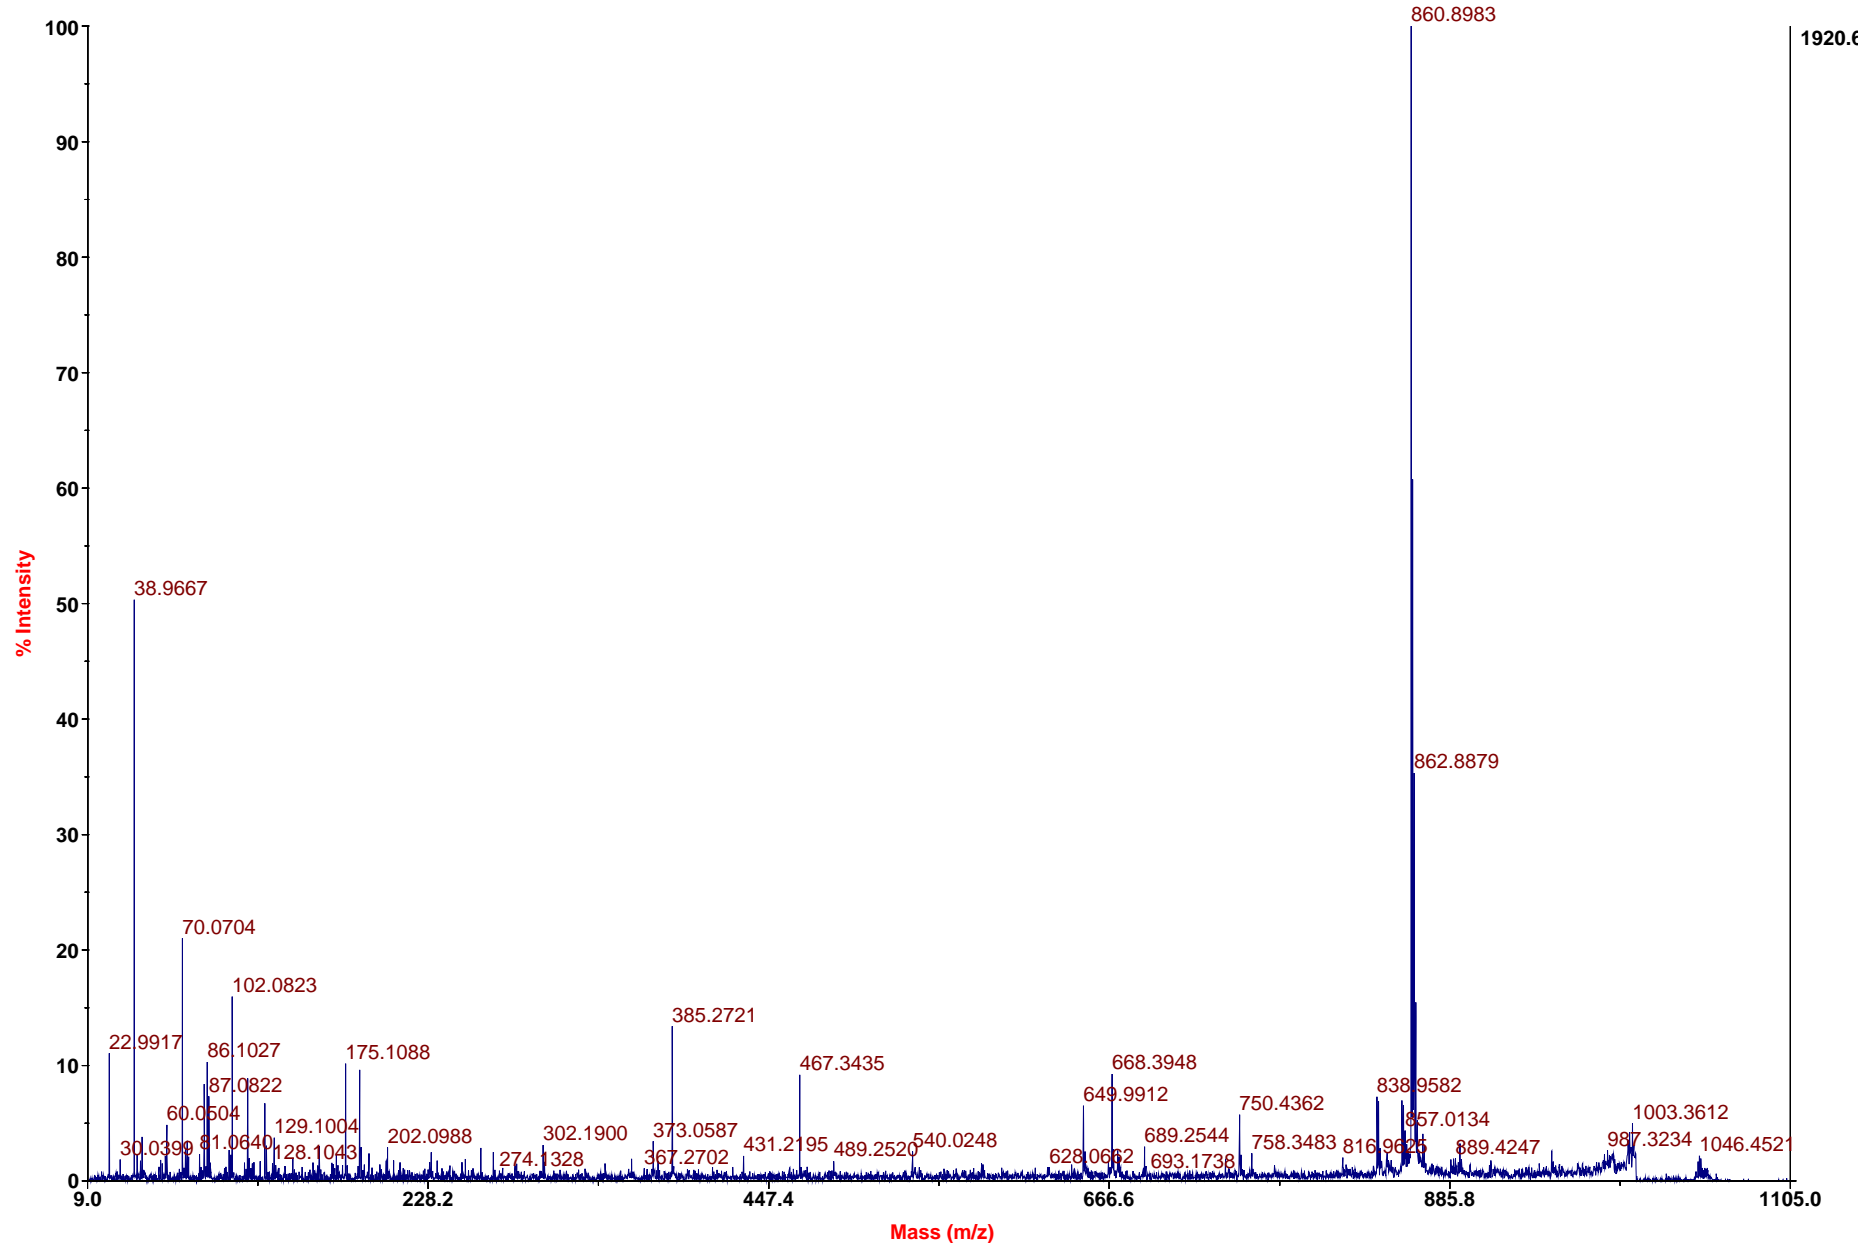

# M4

4700 MS/MS Precursor 1004.56 Spec #1 MC[BP = 1010.3, 2869]

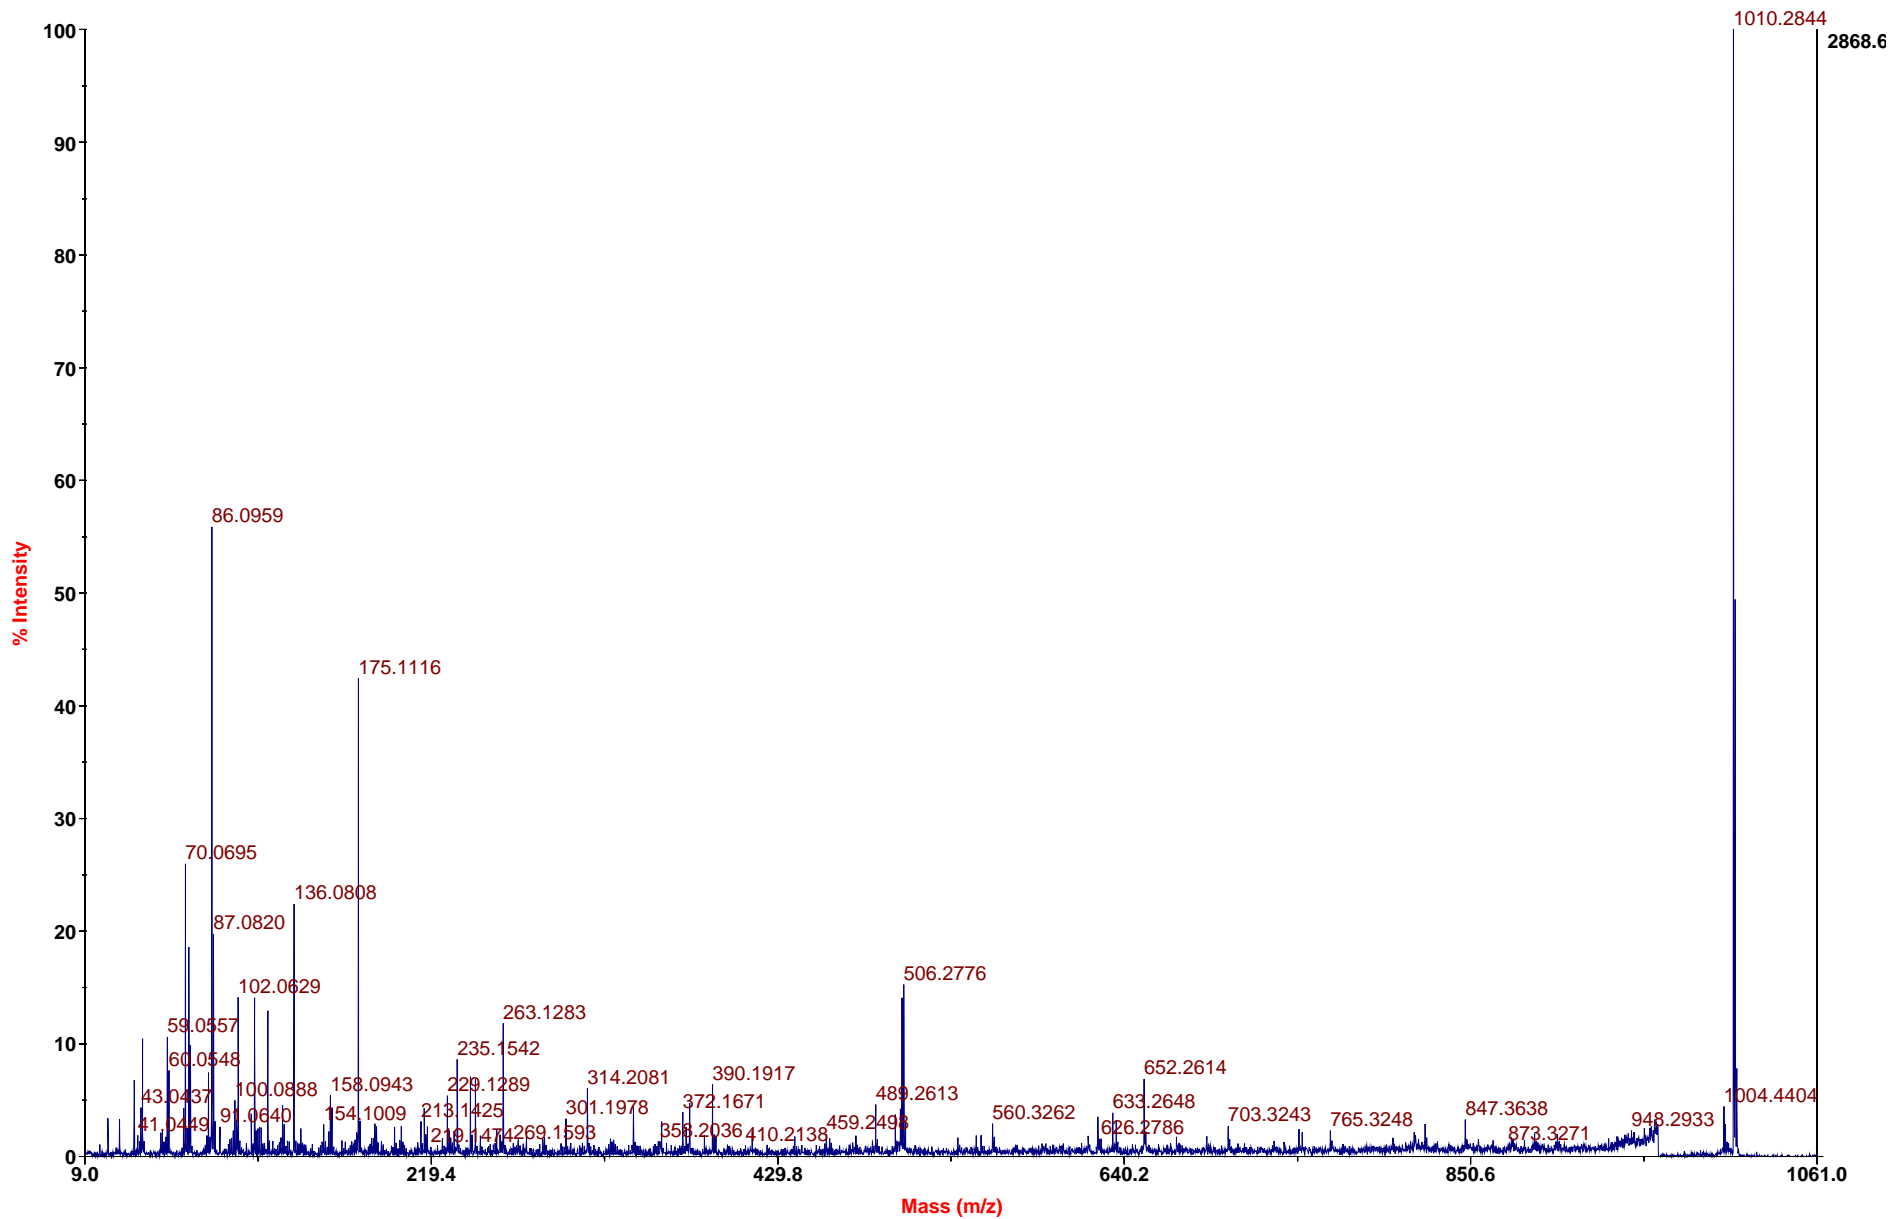



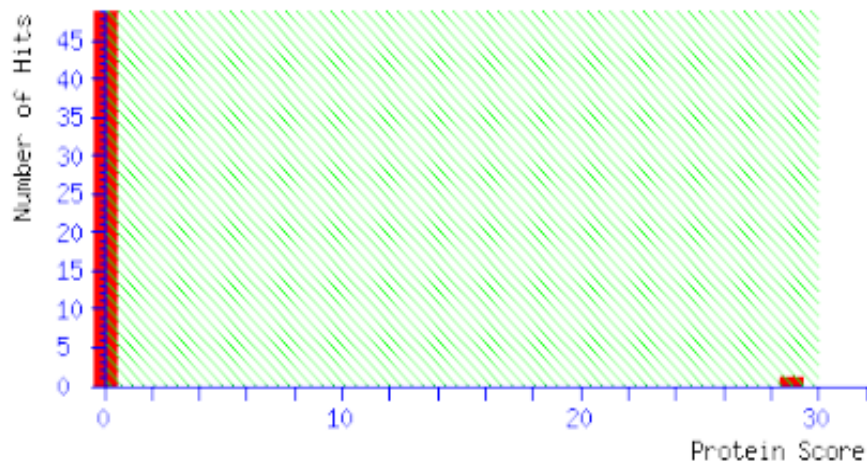

## Peptide Summary Report

[KNG1\\_MOUSE](#) Mass: 73056 Score: 29 Matches: 5

(0) Sequences: 5(0) emPAI: 0.18

Kininogen-1 OS=Mus musculus GN=Kng1 PE=1 SV=1

Check to include this hit in error tolerant search

| Query                                                  | Observed  | Mr(expt)  | Mr(calc)  | ppm  | Miss | Score | Expect | Rank | Unique | Peptide                                          |
|--------------------------------------------------------|-----------|-----------|-----------|------|------|-------|--------|------|--------|--------------------------------------------------|
| <input checked="" type="checkbox"/> <a href="#">4</a>  | 1010.6306 | 1009.6233 | 1009.5596 | 63.1 | 0    | 18    | 0.33   | 1    | U      | K.YVIEFIAR.E                                     |
| <input checked="" type="checkbox"/> <a href="#">9</a>  | 1112.6533 | 1111.6460 | 1111.5761 | 62.9 | 0    | 11    | 3.5    | 1    | U      | R.DIPVDSPELK.E                                   |
| <input checked="" type="checkbox"/> <a href="#">12</a> | 1249.6566 | 1248.6493 | 1248.5663 | 66.5 | 0    | 18    | 1.4    | 1    | U      | K.TDGSPTFYSFK.Y                                  |
| <input checked="" type="checkbox"/> <a href="#">13</a> | 1325.6593 | 1324.6520 | 1324.5574 | 71.5 | 0    | 17    | 1.4    | 1    | U      | K.QALDMTEMAR.R + Carbamidomethyl (C)             |
| <input checked="" type="checkbox"/> <a href="#">47</a> | 2216.1101 | 2215.1028 | 2214.9423 | 72.5 | 0    | 30    | 0.088  | 1    | U      | R.FPSLHGDQVALPNGDDGECR.G + 2 Carbamidomethyl (C) |



## Protein View

Match to: [KNG1\\_MOUSE](#) Score: 29

**Kininogen-1 OS=Mus musculus GN=Kng1 PE=1 SV=1**

Found in search of E:\Dekstop 30.5.2011\Muscle\Dekstop 2.5.11\Muscle DU\Muscle data:  
\sample M4\ppw\_D2\_129990854403.txt

Nominal mass ( $M_r$ ): 73056; Calculated pI value: 6.05

NCBI BLAST search of [KNG1\\_MOUSE](#) against nr

Unformatted [sequence string](#) for pasting into other applications

Taxonomy: [Mus musculus](#)

Variable modifications: Carbamidomethyl (C), Deamidated (NQ), Oxidation (M)

Cleavage by Trypsin: cuts C-term side of KR unless next residue is P

Sequence Coverage: 9%

Matched peptides shown in **Bold Red**

```
1  MKLITLTLTLC  SGLLLTLTQG  EEAQEIDCND  EAVFQAVDFS  LKQFNPGVKS
51  GNQYMLHRVI  EGTKTDGSPT  FYSFKYLIKE  GNCSAQSGLA  WQDCDFKDAE
101 EAATGECTAT  VGKRENEFFI  VTQTCKIAPS  KAPILKAYFP  CIGCVHAIST
151 DSPDLEPVLK  HSIEHFNNNT  DHSHLFTLRK  VKSAHRQVVA  GLNFDITYTI
201 VQTNCSEKERF  PSLHGDCVAL  PNGDDGECRG  NLFMDINNKI  ANFSQSCTLY
251 SGDDLVEALP  KPCPGCPRDI  PVDSPELKEV  LGHSIAQLNA  ENDHPPFYKI
301 DTVKKATSQV  VAGTKYVIEF  IARETKSKE  SNTELAEDCE  IKHLGQSLDC
351 NANVYMRPWE  NKVVPTVKCQ  ALDMTEMARR  PPGFSPFRSV  TVQETKEGRT
401 VSPFYIAREQ  EERDAETEQQ  PTHGHGWLHE  KQIKANKNHR  GHKHGHDHGH
451 WSPRRHGLGH  GHQKPHGLGH  GHQLKLDYLR  HQREDGDDHT  HTVGHGHHGH
501 HGHGHHGHGH  HGHGHHGHGH  HGHGKHTNKD  KNSVKQTTQR  TESLASSEY
551 STTSTQMQR  TEGPTLTPPR  AQPTVTSSGF  QSDSFIEDVV  ATTPPYDTGA
601 HDDLIPDIHV  QPDSLSFKLI  SDFPEATSPK  CPGRPWKPAS  WEDPNTETTE
651 FSDFDLLDAL  S
```

Show predicted peptides also

Sort Peptides By

Residue Number  Increasing Mass  Decreasing Mass

| Start - End                                                                         | Observed  | Mr (expt) | Mr (calo) | ppm | Miss | Sequence               |
|-------------------------------------------------------------------------------------|-----------|-----------|-----------|-----|------|------------------------|
| 65 - 75                                                                             | 1249.6566 | 1248.6493 | 1248.5663 | 67  | 0    | <b>K.TDGSPTFYSEK.Y</b> |
| <a href="#">(Ions score 18)</a>                                                     |           |           |           |     |      |                        |
| 210 - 229                                                                           | 2216.1101 | 2215.1028 | 2214.9423 | 72  | 0    | <b>R.</b>              |
| <b>FPSLHGDCVALPNGDDGECR.G</b> 2 Carbamidomethyl (C) <a href="#">(Ions score 30)</a> |           |           |           |     |      |                        |

# Sample M5

4700 Reflector Spec #1 MC=>NR(2.00)[BP = 1003.6, 11606]

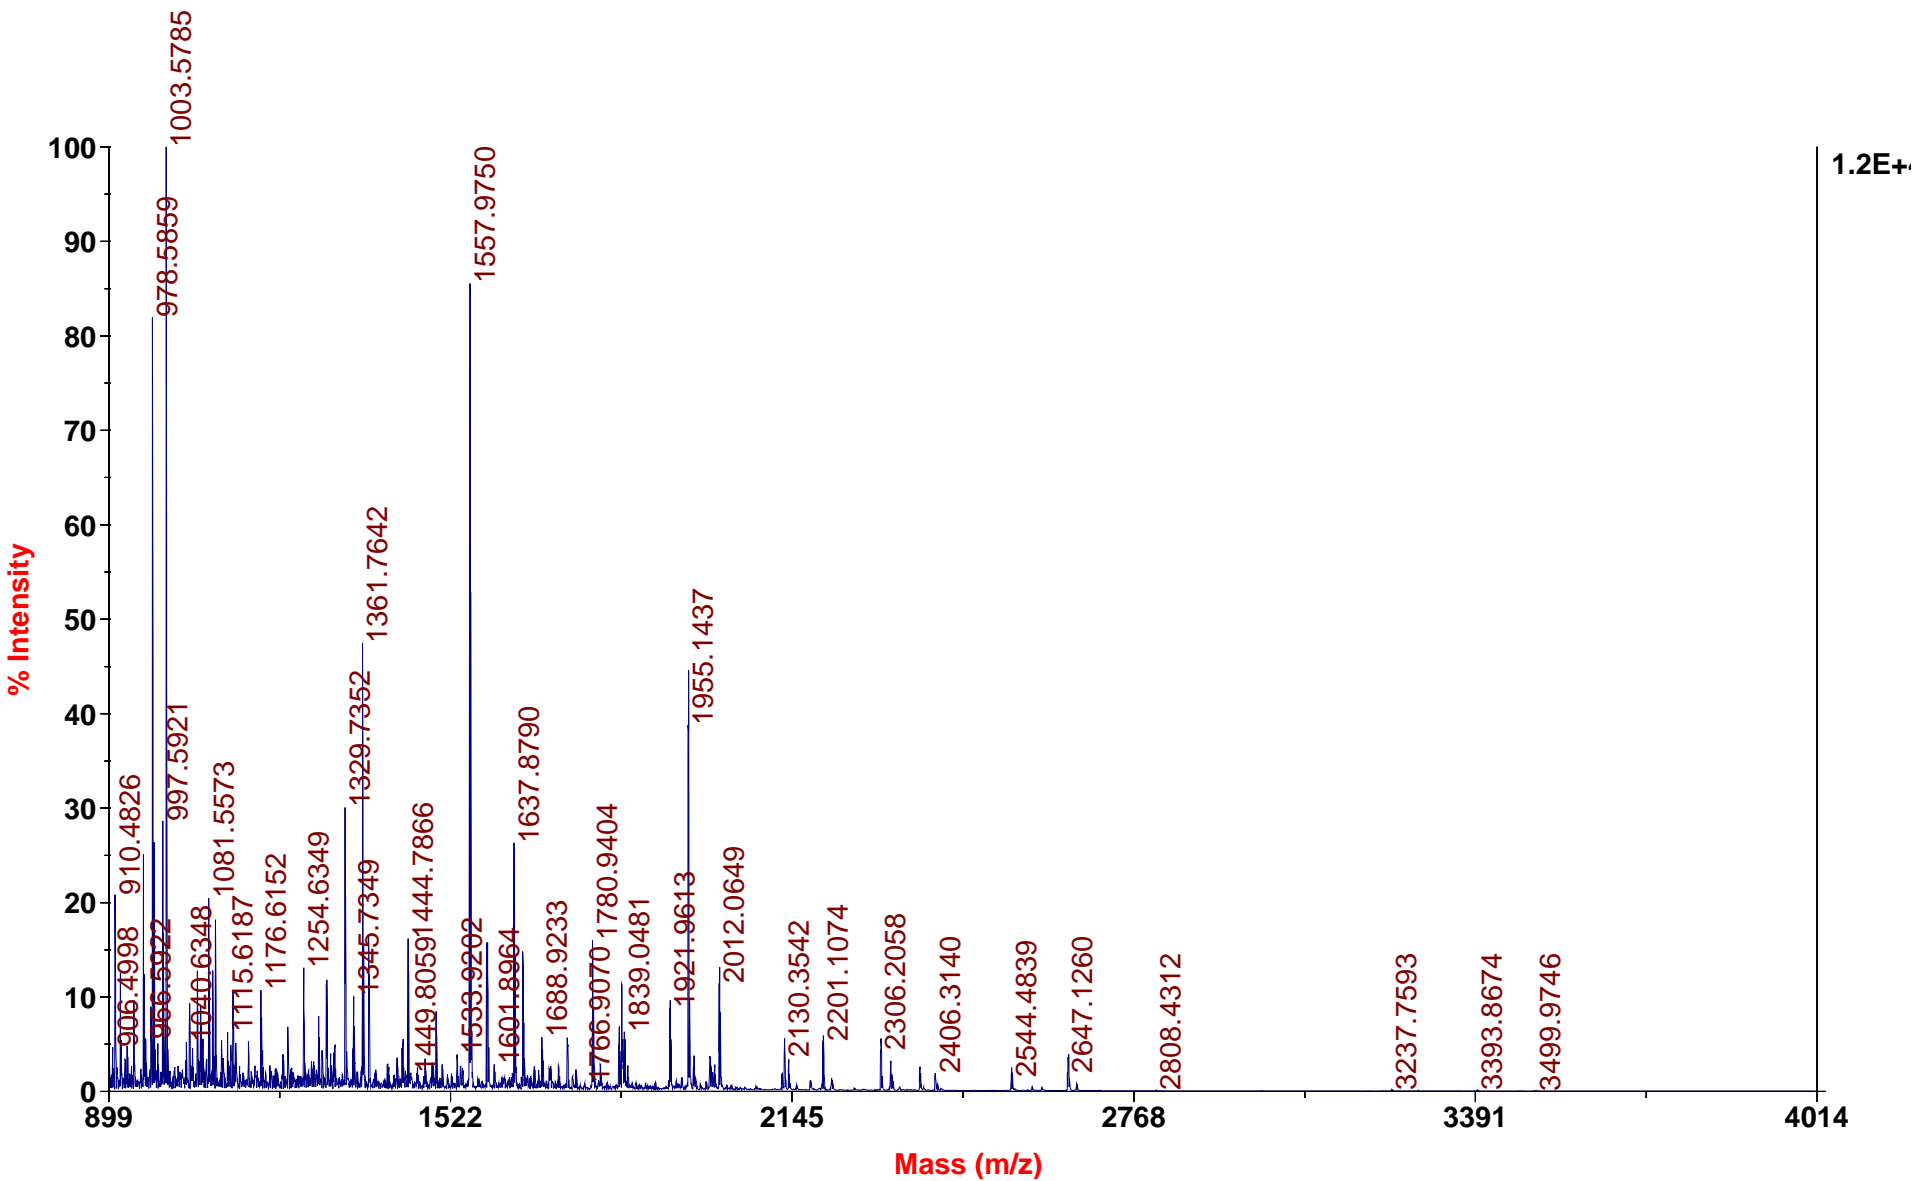

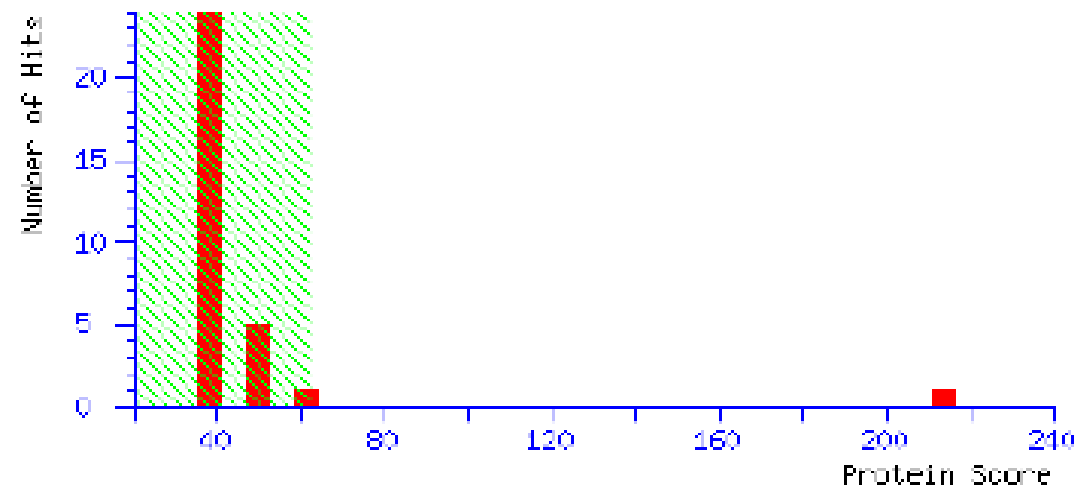

## Concise Protein Summary Report

Format As

Concise Protein Summary

[Help](#)

Significance threshold p<

0.05

Max. number of hits

AUTO

Re-Search All

Search Unmatched

- [CAA69019](#)    **Mass:** 51533    **Score:** 214    **Expect:** 3.7e-17    **Matches:** 23  
 MMVIMENT NID: - Mus musculus

[VIME\\_MOUSE](#)    **Mass:** 53524    **Score:** 211    **Expect:** 7.3e-17    **Matches:** 23  
 Vimentin.- Mus musculus (Mouse).

[A43803](#)    **Mass:** 53597    **Score:** 211    **Expect:** 7.3e-17    **Matches:** 23  
 vimentin - mouse

[Q5FWJ3\\_MOUSE](#)    **Mass:** 53655    **Score:** 211    **Expect:** 7.3e-17    **Matches:** 23

## Protein View

Match to: **CAA69019** Score: **214** Expect: **3.7e-17**

MMVIMENT NID: - **Mus musculus**

Found in search of E:\Dekstop 30.5.2011\Muscle\sample M5\sample M5  
\pmf\_F19\_130406586900.txt

Nominal mass ( $M_r$ ): **51533**; Calculated pI value: **4.96**

NCBI BLAST search of [CAA69019](#) against nr

Unformatted [sequence string](#) for pasting into other applications

Taxonomy: [Mus musculus](#)

Cleavage by Trypsin: cuts C-term side of KR unless next residue is P

Number of mass values searched: **60**

Number of mass values matched: **23**

Sequence Coverage: **51%**

Matched peptides shown in **Bold Red**

```
1  SSRPSSNRSY VTTSTRTYSL GSALRPSTSR SLYSSSPGGA YVTRSSAVRL
51  RSSVPGVRL  QDSVDFSLAD AINTEFKNTR TNEKVELQEL NDRFANYIDK
101 VERFLEQQNKI LLAELEQLKG QGKSRLGDLY EEEMRELRRQ VDQLTNDKAR
151 VEVERDNLAE DIMRLREKLQ EEMLQREEAE STLQSFQDV DNASLARLDL
201 ERKVESLQEE IAFLLKHLHDE EIQELQAQIQ EQHVQIDVDV SKPDLTAALR
251 DVRQQYESVA AKNLQEAEEW YKSKFADLSE AANRNNDALR QAKQESNEYR
301 RQVQSLTCEV DALKGTNESL ERQMREMEEN FALEAANYQD TIGRLQDEIQ
351 NMKEEMARHL REYQDLLNVK MALDIEIATY RKLLEGEESR ISLPLPTFSS
401 LNLRETNLES LPLVDTHSKR TLLIKTVETR DGQVINETSQ HHDDLE
```

Show predicted peptides also

Sort Peptides By

Residue Number

Increasing Mass

Decreasing Mass

| Start - End | Observed  | Mr (expt) | Mr (calc) | ppm | Miss | Sequence          |
|-------------|-----------|-----------|-----------|-----|------|-------------------|
| 17 - 30     | 1495.8473 | 1494.8400 | 1494.7790 | 41  | 0    | R.TYSLGSALRPSTSR. |
| S           |           |           |           |     |      |                   |
| 31 - 44     | 1444.7740 | 1443.7667 | 1443.6994 | 47  | 0    | R.SLYSSSPGGAYVTR. |
| S           |           |           |           |     |      |                   |
| 81 - 93     | 1587.8723 | 1586.8650 | 1586.7900 | 47  | 1    | R.TNEKVELQELNDR.F |
| 85 - 93     | 1115.6179 | 1114.6106 | 1114.5618 | 44  | 0    | K.VELQELNDR.F     |
| 94 - 102    | 1125.6492 | 1124.6419 | 1124.5978 | 39  | 1    | R.FANYIDKVR.F     |
| 126 - 135   | 1254.6244 | 1253.6171 | 1253.5598 | 46  | 0    | R.LGDLYEEEMR.E    |
| 140 - 150   | 1287.7262 | 1286.7189 | 1286.6579 | 47  | 1    | R.QVDQLTNDKAR.V   |
| 151 - 164   | 1688.9004 | 1687.8931 | 1687.8199 | 43  | 1    | R.VEVERDNLAEIMR.  |

# M5

4700 MS/MS Precursor 978.586 Spec #1 MC[BP = 70.1, 2864]

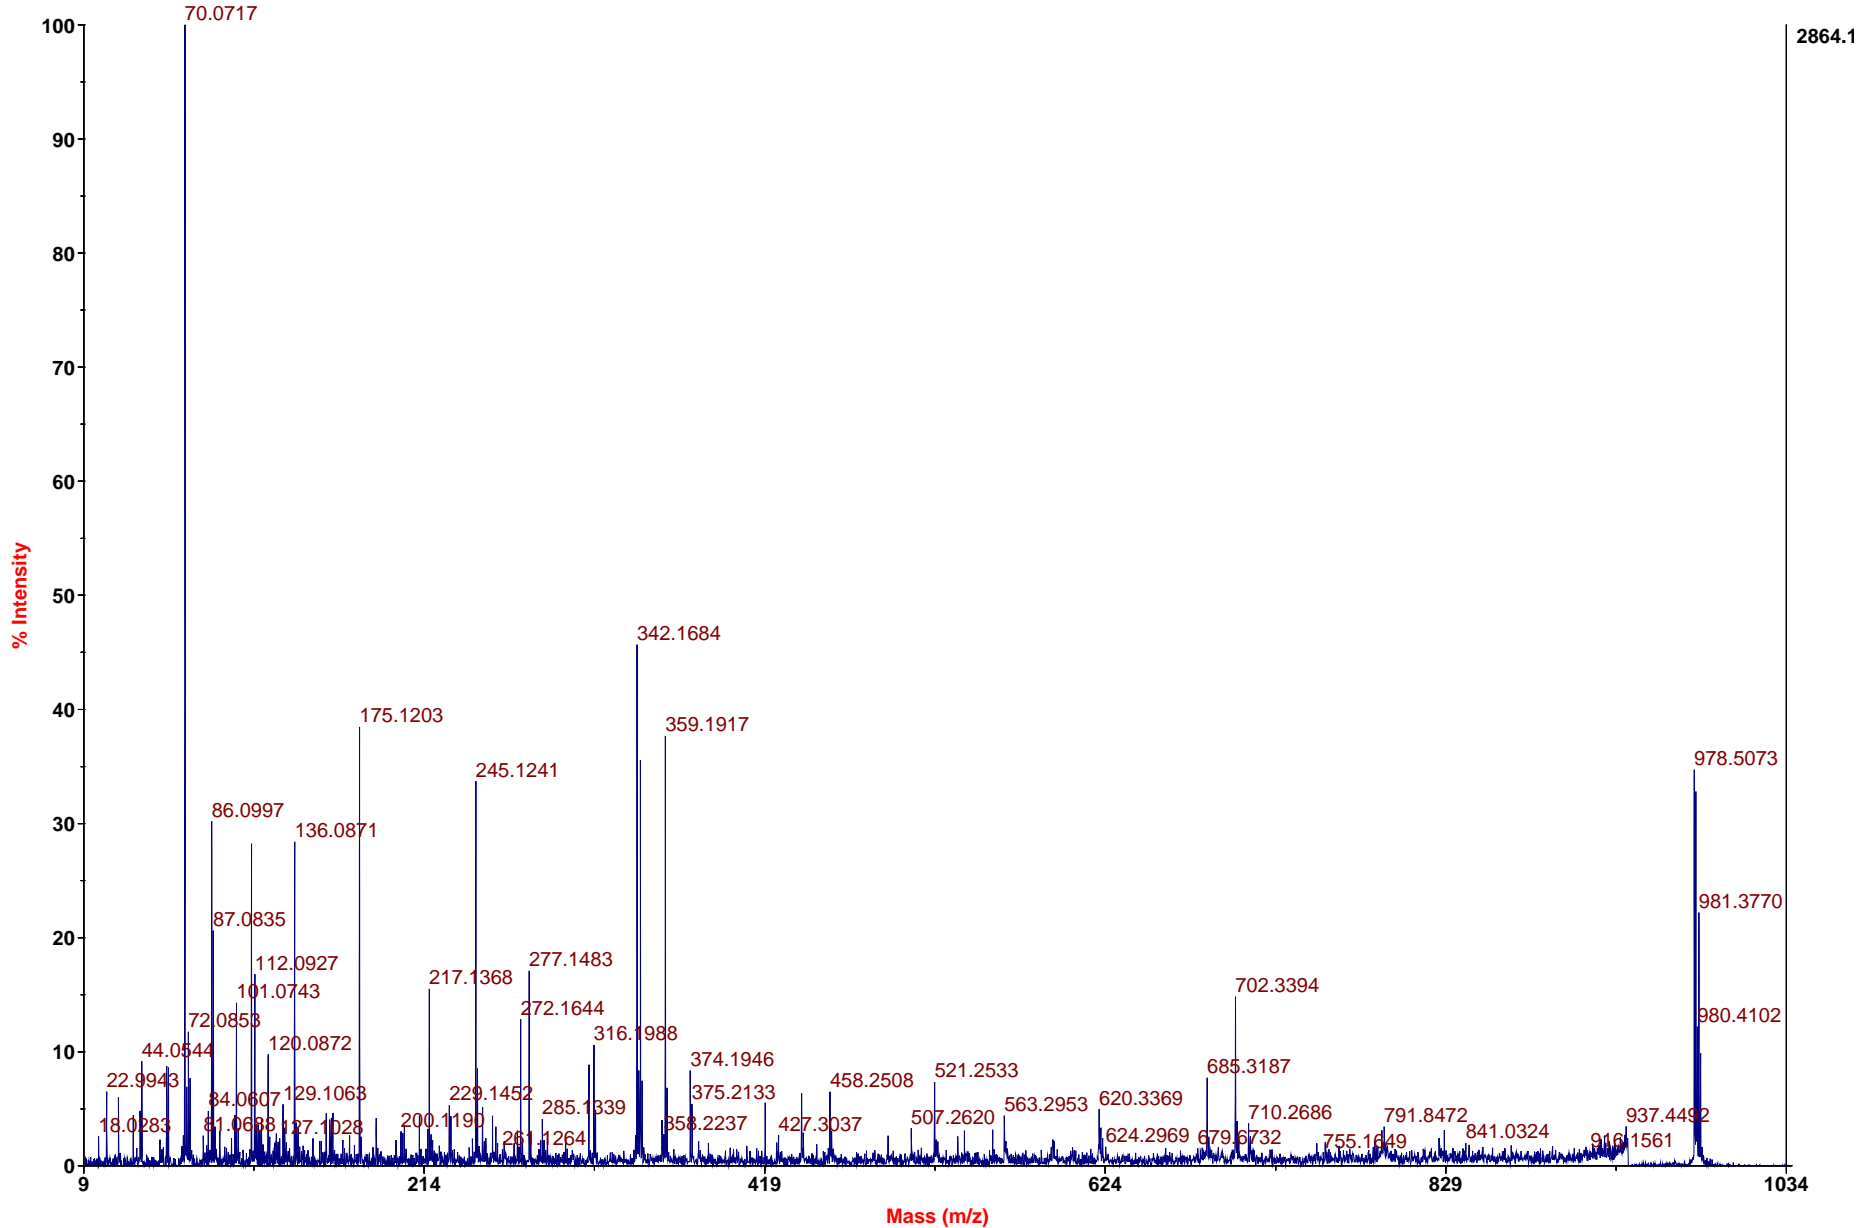

# M5

4700 MS/MS Precursor 1556.96 Spec #1 MC[BP = 86.1, 1687]

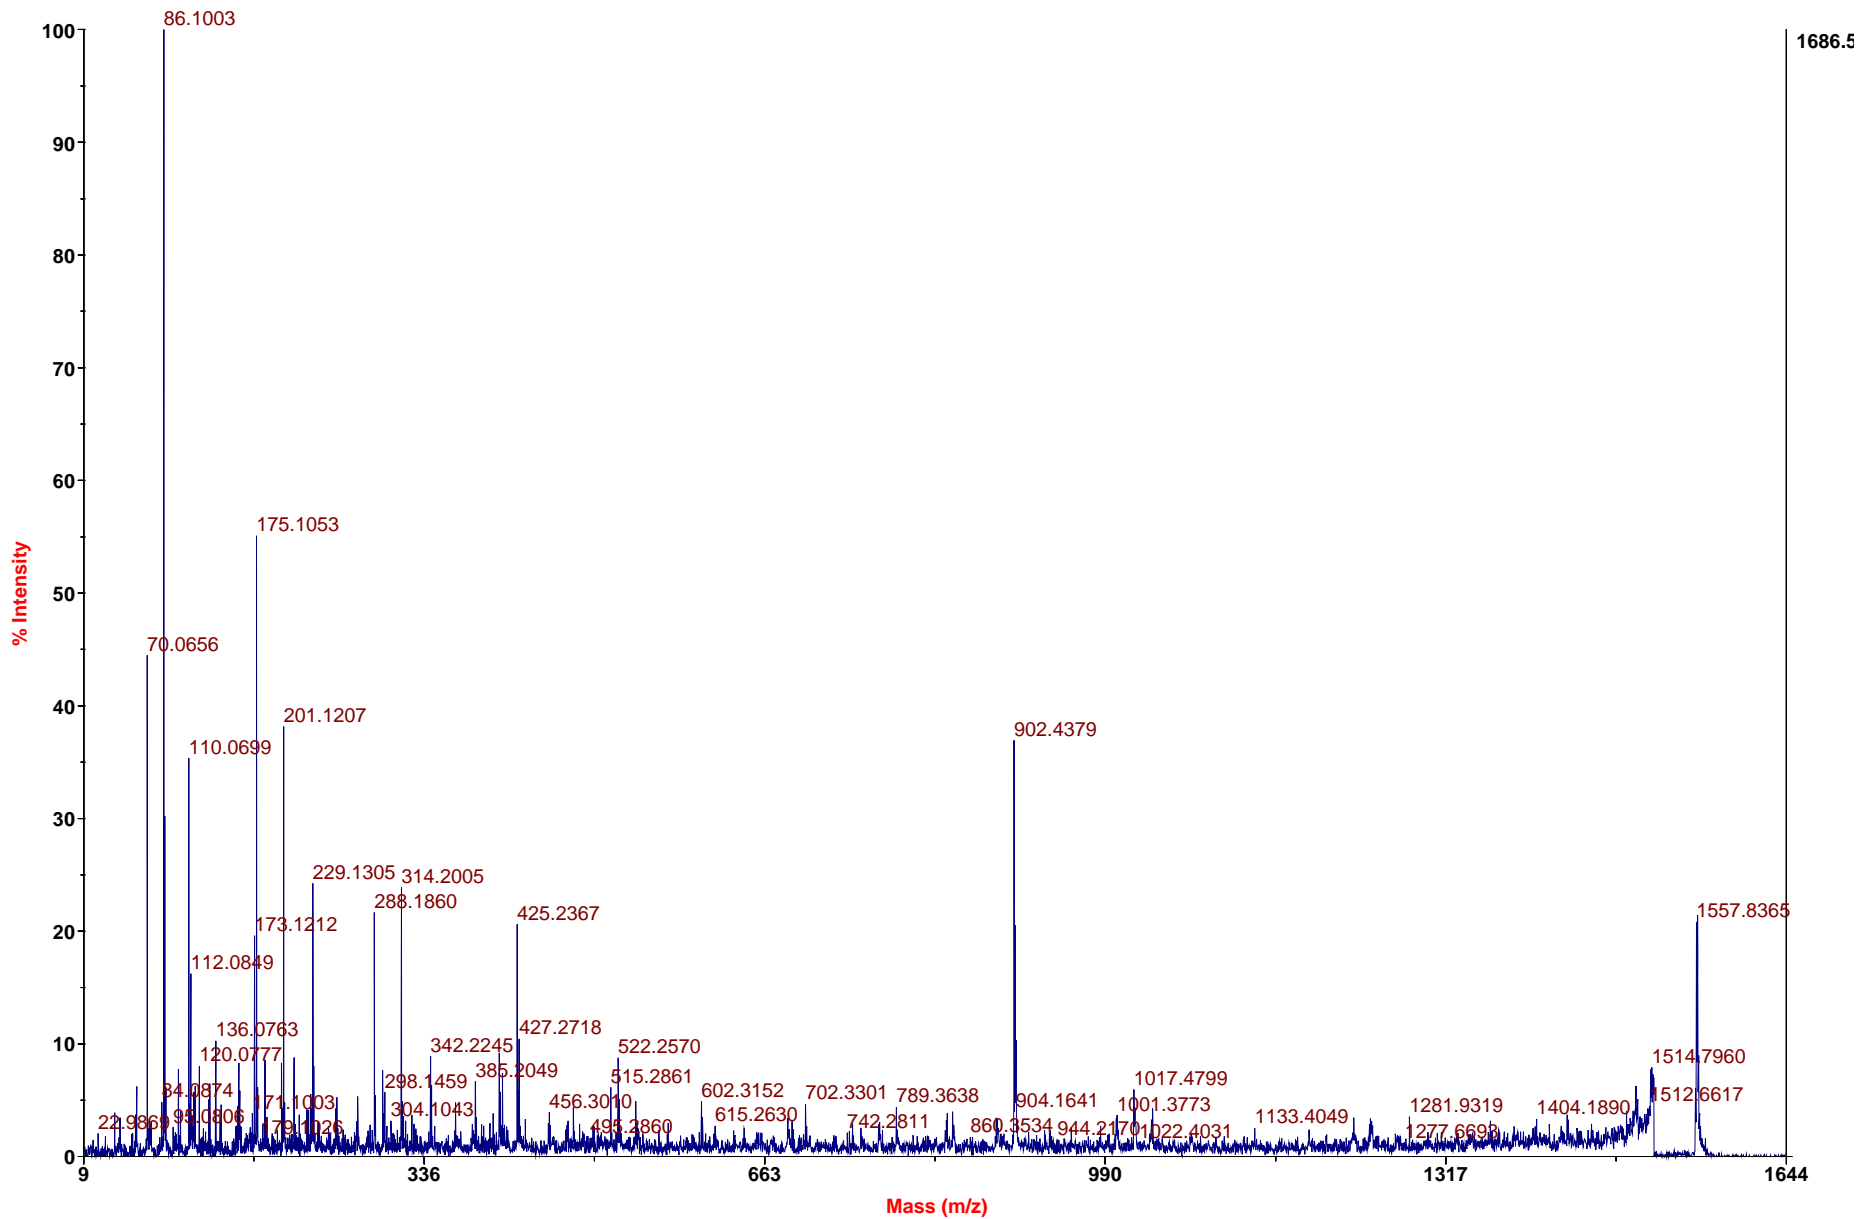

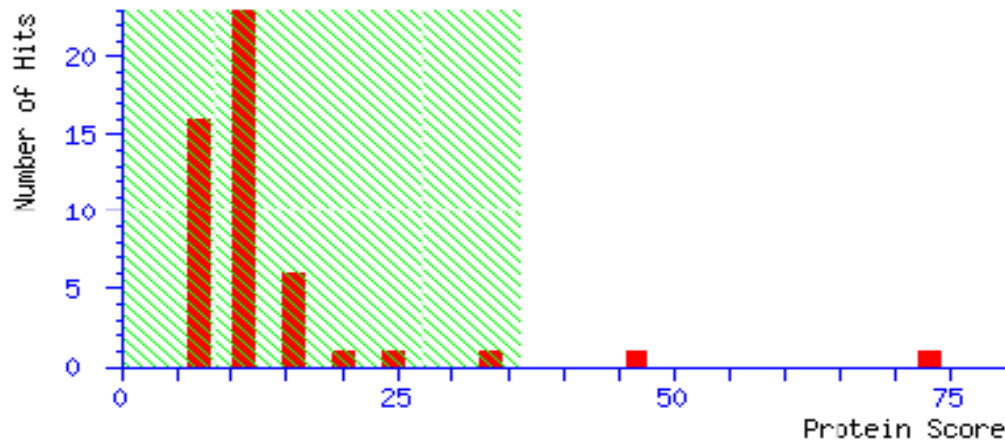

## Peptide Summary Report

[VIME\\_MOUSE](#) Mass: 53524 Score: 73 Matches: 3(0) Sequences: 3(0)

Vimentin.- Mus musculus (Mouse).

Check to include this hit in error tolerant search

| Query                                                  | Observed  | Mr(expt)  | Mr(calc)  | ppm  | Miss | Score | Expect | Rank | Unique | Peptide            |
|--------------------------------------------------------|-----------|-----------|-----------|------|------|-------|--------|------|--------|--------------------|
| <input checked="" type="checkbox"/> <a href="#">9</a>  | 1444.7740 | 1443.7667 | 1443.6994 | 46.6 | 0    | 31    | 0.25   | 1    | U      | R.SLYSSSPGGAYVTR.S |
| <input checked="" type="checkbox"/> <a href="#">10</a> | 1557.9629 | 1556.9556 | 1556.8926 | 40.5 | 0    | 29    | 0.12   | 1    | U      | R.ISLPLPTFSSLNLR.E |
| <input checked="" type="checkbox"/> <a href="#">11</a> | 1587.8723 | 1586.8650 | 1586.7900 | 47.3 | 1    | 13    | 13     | 1    | U      | R.TNEKVELQELNDR.F  |

## Protein View

Match to: **VIME\_MOUSE** Score: **73**

**Vimentin.- Mus musculus (Mouse)**.

Found in search of E:\Dekstop 30.5.2011\Muscle\sample M5\sample M5  
\ppw\_F19\_130406591600.txt

Nominal mass ( $M_r$ ): **53524**; Calculated pI value: **5.06**

NCBI BLAST search of [VIME\\_MOUSE](#) against nr

Unformatted [sequence string](#) for pasting into other applications

Taxonomy: [Mus musculus](#)

Variable modifications: Carbamidomethyl (C), Deamidated (NQ), Oxidation (M)

Cleavage by Trypsin: cuts C-term side of KR unless next residue is P

Sequence Coverage: **8%**

Matched peptides shown in **Bold Red**

```
1 STRSVSSSSY RRMFGGSGTS SRPSSNRSYV TTSTRTYSLG SALRPSTSRS
51 LYSSSPGGAY VTRSSAVRLR SSVPGVRLQ DSVDFSLADA INTEFKNTRT
101 NEKVELQELN DRFANYIDKV RFLEQQNKIL LAELEQLKGQ GKSRLGDLYE
151 EEMRELRRQV DQLTNDKARV EVERDNLAED IMRLREKLQE EMLQREEAES
201 TLQSFQRQVD NASLARLDLE RKVESLQEEI AFLKKLHDEE IQELQAQIQE
251 QHVQIDVDVS KPDLTAALRD VRQQYESVAA KNLQEAEEWY KSKFADLSEA
301 ANRNNDALRQ AKQESNEYRR QVQSLTCEVD ALKGTNESLE RQMREMEENF
351 ALEAANYQDT IGRLQDEIQN MKEEMARHLR EYQDLLNVKM ALDIEIATYR
401 KLEGEESRI SLPLPTFSSL NLRETNLESL PLVDTHSKRT LLIKTVETRD
451 GQVINETSQH HDDLE
```

Show predicted peptides also

Sort Peptides By

Residue Number  Increasing Mass  Decreasing Mass

| Start - End                                  | Observed  | Mr (expt) | Mr (calc) | ppm | Miss | Sequence          |
|----------------------------------------------|-----------|-----------|-----------|-----|------|-------------------|
| 50 - 63<br><a href="#">(Ions score 31)</a>   | 1444.7740 | 1443.7667 | 1443.6994 | 47  | 0    | R.SLYSSSPGGAYVTR. |
| 100 - 112<br><a href="#">(Ions score 13)</a> | 1587.8723 | 1586.8650 | 1586.7900 | 47  | 1    | R.TNEKVELQELNDR.F |
| 410 - 423<br><a href="#">(Ions score 29)</a> | 1557.9629 | 1556.9556 | 1556.8926 | 40  | 0    | R.ISLPLPTFSSLNLR. |



Sample M6

4700 Reflector Spec #1 MC=>NR(2.00)[BP = 980.5, 23361]

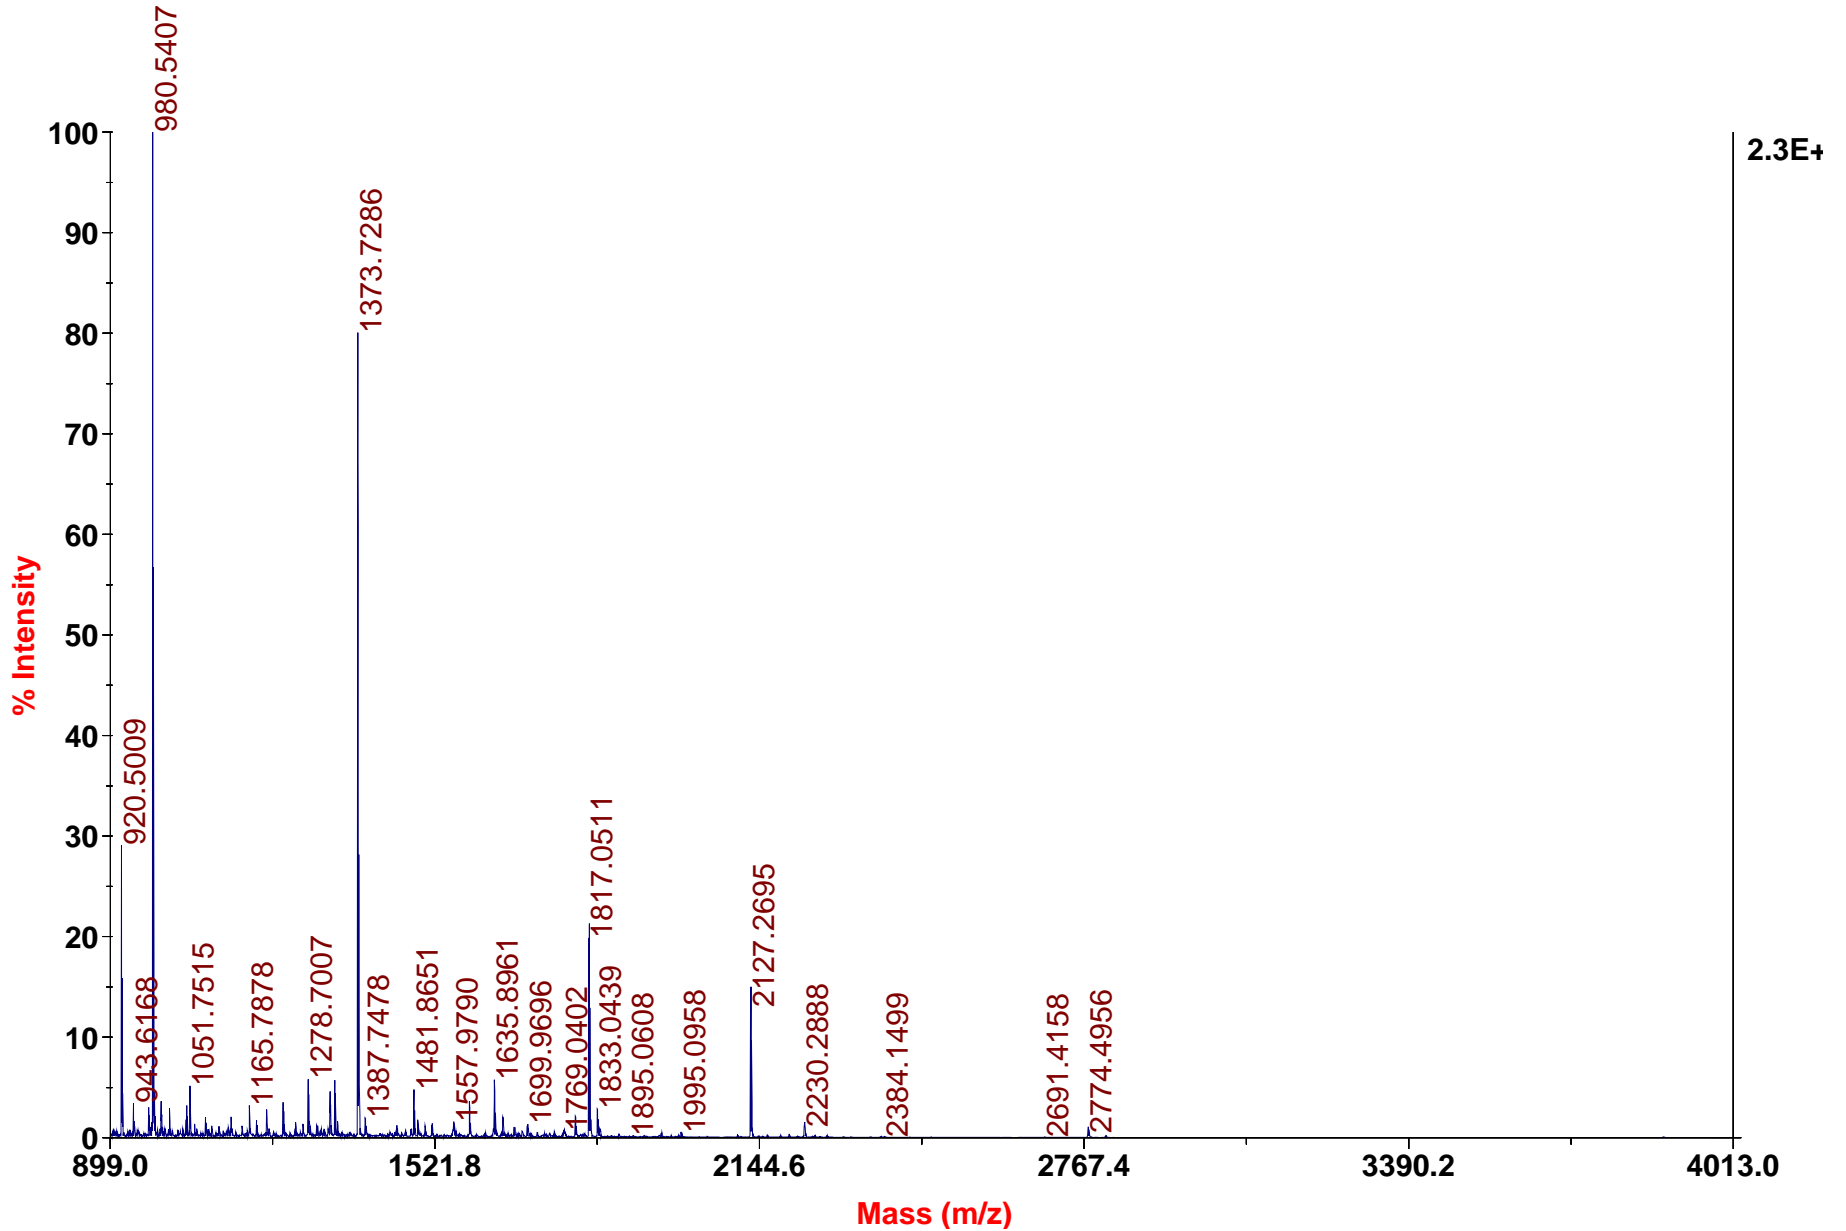

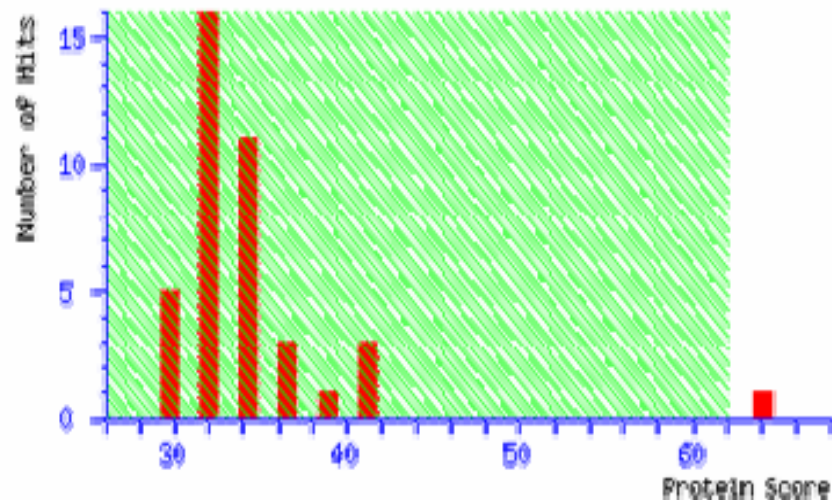

## Concise Protein Summary Report


[Help](#)

 Significance threshold  $p <$  

 Max. number of hits 



- [Q3UBS3 MOUSE](#)    **Mass:** 38727    **Score:** 64    **Expect:** 0.036    **Matches:** 21  
 Bone marrow macrophage cDNA, RIKEN full-length enriched library, clone:I830015M19 product:haptoglobin,

[Q63927 9MURI](#)    **Mass:** 38750    **Score:** 53    **Expect:** 0.48    **Matches:** 19  
 Haptoglobin.- Mus sp.

[HPMS](#)    **Mass:** 38821    **Score:** 52    **Expect:** 0.54    **Matches:** 19  
 haptoglobin precursor - mouse

## Protein View

Match to: [Q3UBS3\\_MOUSE](#) Score: 64 Expect: 0.036

Bone marrow macrophage cDNA, RIKEN full-length enriched library, clone:I830015M19 product:haptoglobin, Found in search of pmf\_F2\_129990848905.txt

Nominal mass ( $M_r$ ): 38727; Calculated pI value: 5.88

NCBI BLAST search of [Q3UBS3\\_MOUSE](#) against nr

Unformatted [sequence string](#) for pasting into other applications

Taxonomy: [Mus musculus](#)

Links to retrieve other entries containing this sequence from NCBI Entrez:

(no taxonomy information for this entry)  
(no taxonomy information for this entry)

Variable modifications: Carbamidomethyl (C), Deamidated (NQ), Oxidation (M)

Cleavage by Trypsin: cuts C-term side of KR unless next residue is P

Number of mass values searched: 129

Number of mass values matched: 21

Sequence Coverage: 54%

Matched peptides shown in **Bold Red**

```
1 MRALGAVVTL LLWGQLFAVE LGNDAMDFED DSCPFPPEIA NGYVEHLVRY
51 RCRQFYRLRA EGDGVYTLND EKQWVNTVAG EKLLPECEAVC GKPKHPVDQV
101 QRIIGGSMDA KGSFPWQAKM ISRHGLTTGA TLISDQWLLT TAKNLFNLHS
151 ETASAKDITP TLTLTYVGKNQ LVEIEKVV LH PNHSVVDIGL IKLKQRVLVT
201 ERVMPICLPS KDYIAPGRVG YVSGWGRNAN FRFTDRLKYV MLPVADQDKC
251 VVHYENSTVP EKKNLTPVG VQPILNEHTF CAGLTKYQED TCYGDAGSAF
301 AIHDMEEDTW YAAGILSFDK SCAVAEYGVY VRATDLKDWV QETMAKN
```

Show predicted peptides also

Sort Peptides By

Residue Number  Increasing Mass  Decreasing Mass

| Start - End      | Observed         | Mr(expt)         | Mr(calc)         | ppm       | Miss     | Sequence                                      |
|------------------|------------------|------------------|------------------|-----------|----------|-----------------------------------------------|
| <b>83 - 94</b>   | <b>1387.7445</b> | <b>1386.7372</b> | <b>1386.6635</b> | <b>53</b> | <b>0</b> | <b>K.LPECEAVCGKPK.H</b> 2 Carbamidomethyl (C) |
| <b>95 - 102</b>  | <b>978.5474</b>  | <b>977.5401</b>  | <b>977.5043</b>  | <b>37</b> | <b>0</b> | <b>K.HPVDQVQR.I</b>                           |
| <b>103 - 119</b> | <b>1809.0271</b> | <b>1808.0198</b> | <b>1807.8927</b> | <b>70</b> | <b>1</b> | <b>R.IIGGSMDAKGSFPWQAK.M</b> Oxidation (M)    |
| <b>112 - 119</b> | <b>920.5013</b>  | <b>919.4940</b>  | <b>919.4552</b>  | <b>42</b> | <b>0</b> | <b>K.GSFPWQAK.M</b>                           |
| <b>124 - 143</b> | <b>2127.2664</b> | <b>2126.2591</b> | <b>2126.1372</b> | <b>57</b> | <b>0</b> | <b>R.HGLTTGATLISDQWLLTTAK.N</b>               |
| <b>157 - 168</b> | <b>1320.8011</b> | <b>1319.7938</b> | <b>1319.7337</b> | <b>46</b> | <b>0</b> | <b>K.DITPTLTLTYVGK.N</b>                      |
| <b>169 - 176</b> | <b>972.5767</b>  | <b>971.5694</b>  | <b>971.5287</b>  | <b>42</b> | <b>0</b> | <b>K.NQLVEIEK.V</b>                           |

# M6

4700 MS/MS Precursor 980.541 Spec #1 MC[BP = 136.1, 5532]

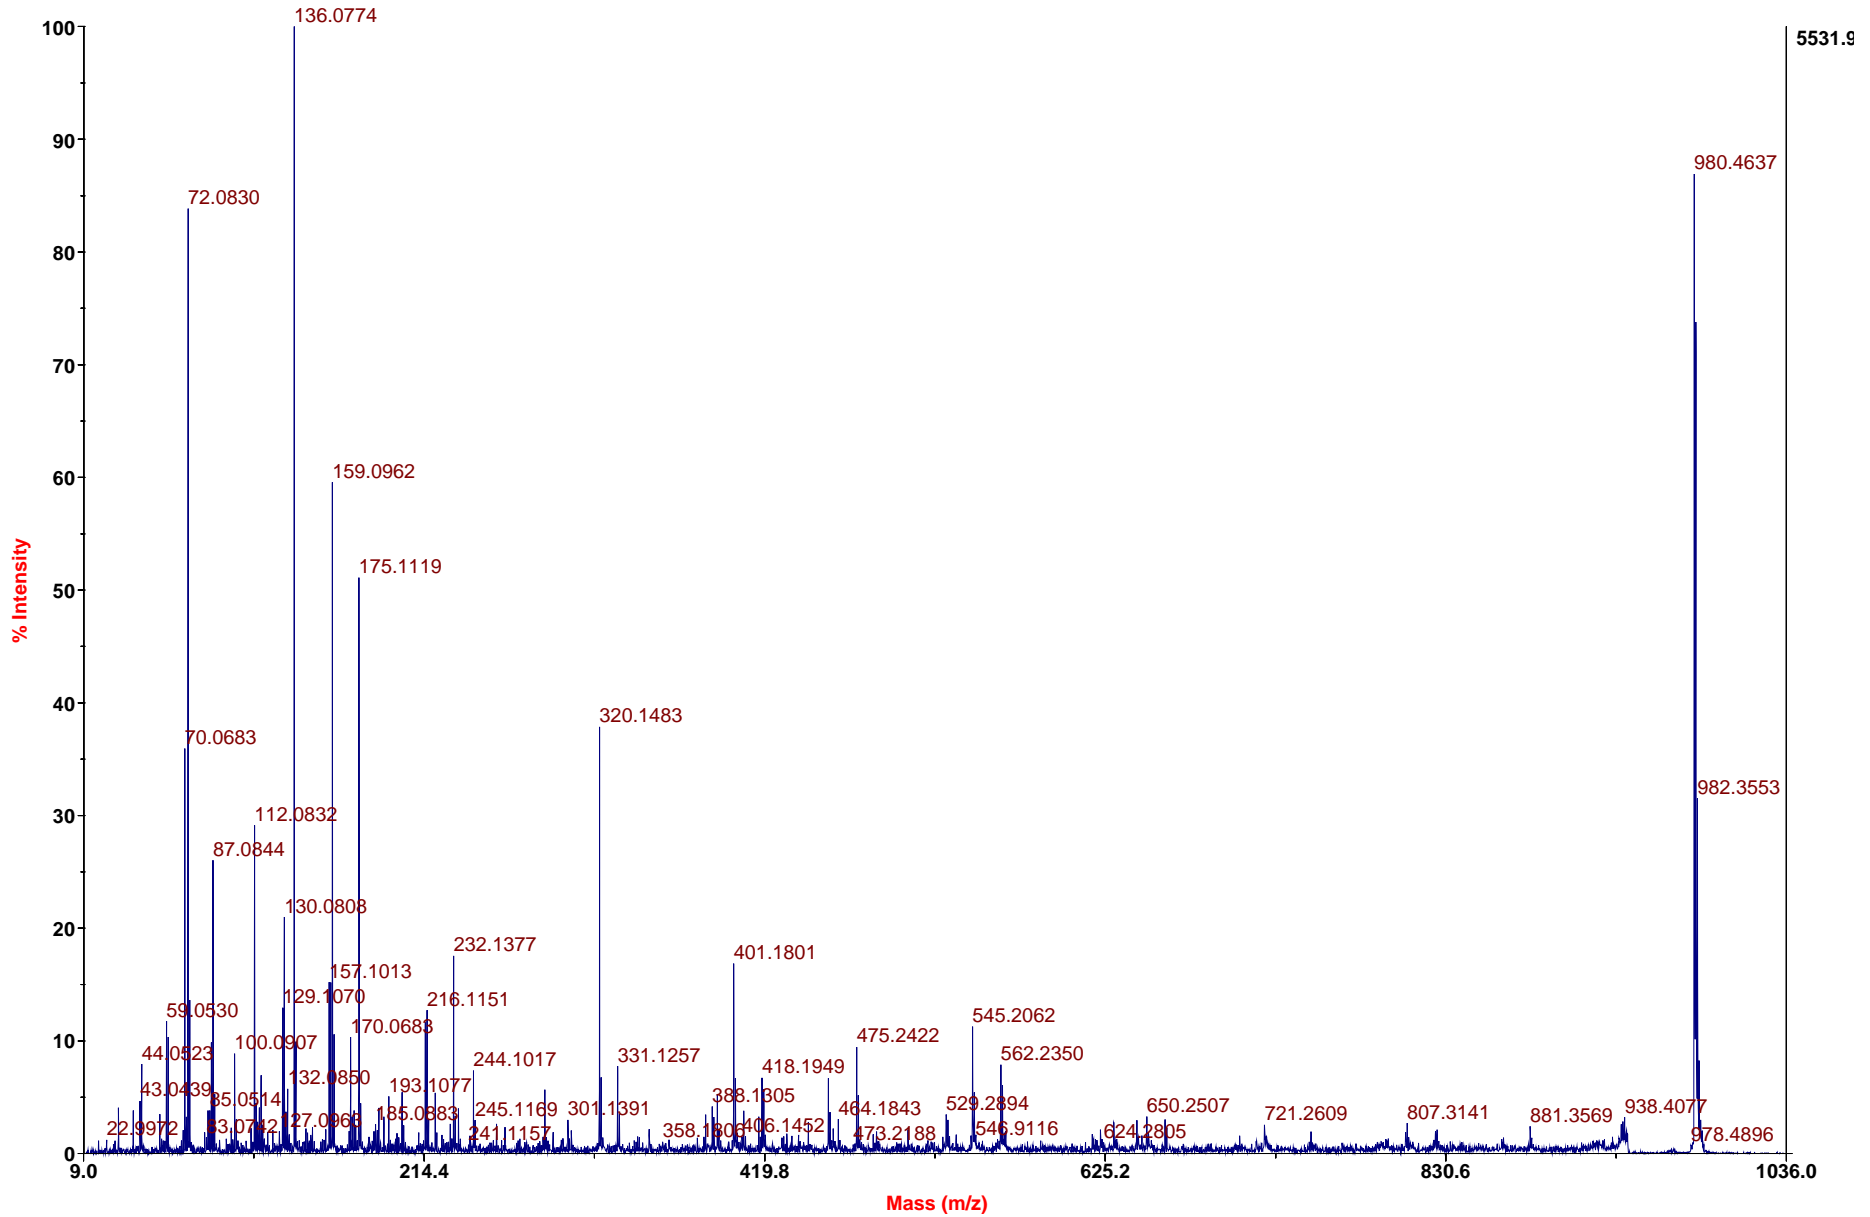

# M6

4700 MS/MS Precursor 1051.75 Spec #1 MC[BP = 861.0, 2260]

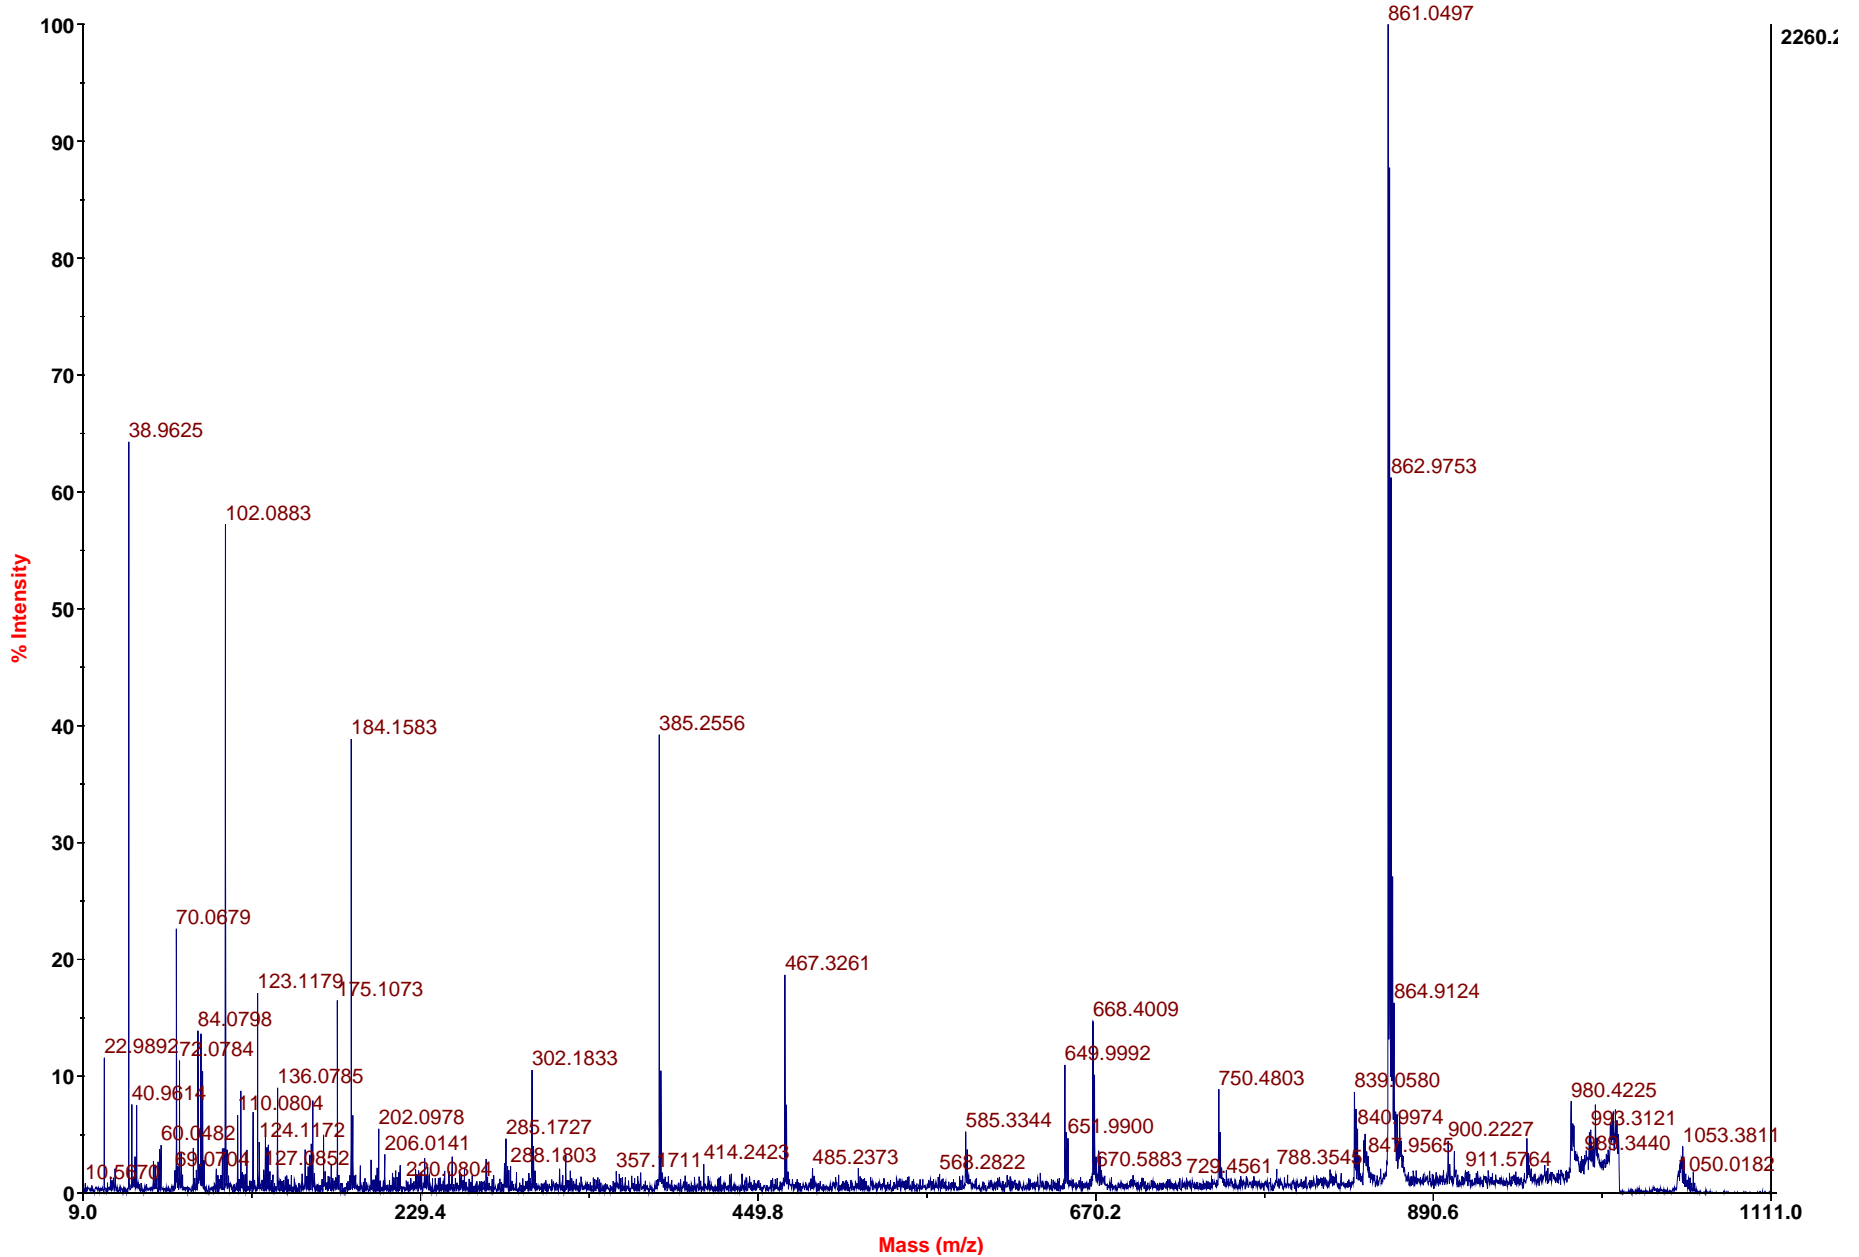

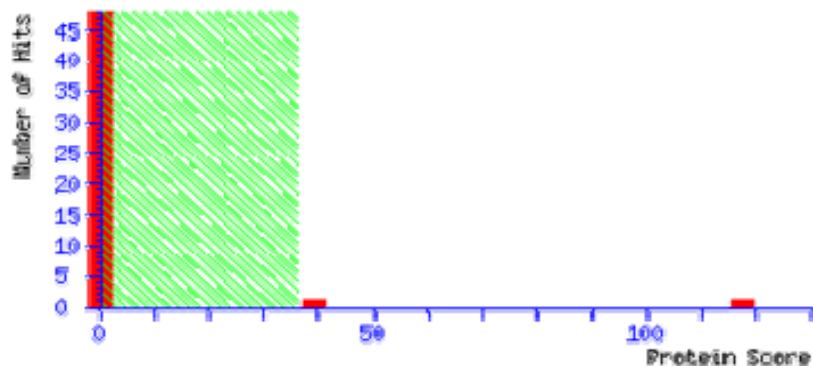

## Peptide Summary Report

Format As

Peptide Summary

[Help](#)

Significance threshold  $p <$

Max. number of hits

Standard scoring

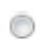

MudPIT scoring

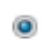

Ions score or expect cut-off

Show sub-sets

Show pop-ups

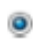

Suppress pop-ups

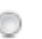

Sort unassigned

Require bold red

Select All

Select None

Search Selected

Error tolerant

1. [HPMS](#) Mass: 38821 Score: 117 Matches: 9(3) Sequences: 8(3) emPAI: 1.03

haptoglobin precursor - mouse

Check to include this hit in error tolerant search

| Query                                                  | Observed  | Mr(expt)  | Mr(calc)  | ppm  | Miss | Score | Expect  | Rank | Unique | Peptide                     |
|--------------------------------------------------------|-----------|-----------|-----------|------|------|-------|---------|------|--------|-----------------------------|
| <input checked="" type="checkbox"/> <a href="#">1</a>  | 920.5013  | 919.4940  | 919.4552  | 42.2 | 0    | 32    | 0.17    | 1    | U      | K.GSFPWQAK.M                |
| <input checked="" type="checkbox"/> <a href="#">3</a>  | 972.5767  | 971.5694  | 971.5287  | 41.8 | 0    | 24    | 0.94    | 1    | U      | K.NQLVEIEK.V                |
| <input checked="" type="checkbox"/> <a href="#">4</a>  | 980.5405  | 979.5333  | 979.4876  | 46.6 | 0    | 39    | 0.03    | 1    | U      | R.VGYVSGWGR.N               |
| <input checked="" type="checkbox"/> <a href="#">10</a> | 1278.6979 | 1277.6906 | 1277.6326 | 45.4 | 0    | 37    | 0.058   | 1    | U      | K.YVMLPVADQDK.C             |
| <input checked="" type="checkbox"/> <a href="#">11</a> | 1320.8011 | 1319.7938 | 1319.7337 | 45.6 | 0    | 23    | 0.66    | 1    | U      | K.DITPTLTLYVVK.N            |
| <input checked="" type="checkbox"/> <a href="#">16</a> | 1635.8950 | 1634.8877 | 1634.7974 | 55.3 | 1    | 26    | 0.76    | 1    | U      | R.ATDLKDWVQETMAK.N          |
| <input checked="" type="checkbox"/> <a href="#">18</a> | 1817.0505 | 1816.0432 | 1815.9375 | 58.2 | 1    | 52    | 0.0013  | 1    | U      | R.VMPICLPSKDYIAPGR.V + Carl |
| <input checked="" type="checkbox"/> <a href="#">19</a> | 1833.0441 | 1832.0368 | 1831.9324 | 57.0 | 1    | (22)  | 1.3     | 1    | U      | R.VMPICLPSKDYIAPGR.V + Carl |
| <input checked="" type="checkbox"/> <a href="#">38</a> | 2127.2664 | 2126.2591 | 2126.1372 | 57.4 | 0    | 57    | 0.00022 | 1    | U      | R.HGLTTGATLISDQWLLTTAK.N    |

## Protein View

Match to: **HPMS** Score: 117

**haptoglobin precursor - mouse**

Found in search of ppw\_F2\_129990854705.txt

Nominal mass ( $M_r$ ): 38821; Calculated pI value: 6.08

NCBI BLAST search of [HPMS](#) against nr

Unformatted [sequence string](#) for pasting into other applications

Taxonomy: [Mus musculus](#)

Variable modifications: Carbamidomethyl (C), Deamidated (NQ), Oxidation (M)

Cleavage by Trypsin: cuts C-term side of KR unless next residue is P

Sequence Coverage: 28%

Matched peptides shown in **Bold Red**

```
1 MRALGAVVTL LLWGQLFAVE LGNDAMDFED DSCP KPPEIA NGYVEHLVRY
51 RCRQFYRLRA EGDGVYTLND EKQWVNTVAG HKLPECEAVC GKPKHPVDQV
101 QRIIGGSM DA KGSFPWQAKM ISRHGLTTGA TLISDQWLLT TAKNLFLNHS
151 ETASAKDITP TLTLYVGKNQ LVEIEKVVLH FNHSVVDIGL IKLKQRVLVT
201 ERVMPICLPS KDYIAPGRVG YVSGWGRNAN FRFTDRLKYV MLPVADQDKC
251 VVHYENSTVP EKKNLTSPVQ VQPILNEHTF CAGLTKYQED TCYGDAGSAF
301 AIHDMEEDTW YAAGILSFDK TCAVAEYGVY VRATDLKDWV QETMAKN
```

Show predicted peptides also

Sort Peptides By

Residue Number  Increasing Mass  Decreasing Mass

| Start - End | Observed  | Mr(expt)  | Mr(calc)  | ppm | Miss | Sequence                                                       |
|-------------|-----------|-----------|-----------|-----|------|----------------------------------------------------------------|
| 112 - 119   | 920.5013  | 919.4940  | 919.4552  | 42  | 0    | <b>K.GSFPWQAK.M</b> ( <a href="#">Ions score 32</a> )          |
| 124 - 143   | 2127.2664 | 2126.2591 | 2126.1372 | 57  | 0    | <b>R.HGLTTGATLISDQWLLTTAK.N</b> ( <a href="#">Ions score</a> ) |
| 157 - 168   | 1320.8011 | 1319.7938 | 1319.7337 | 46  | 0    | <b>K.DITPTLTLYVGK.N</b> ( <a href="#">Ions score 23</a> )      |
| 169 - 176   | 972.5767  | 971.5694  | 971.5287  | 42  | 0    | <b>K.NQLVEIEK.V</b> ( <a href="#">Ions score 24</a> )          |
| 203 - 218   | 1817.0505 | 1816.0432 | 1815.9375 | 58  | 1    | <b>R.VMPICLPSKDYIAPGR.V</b> Carbamidomethyl                    |
| 203 - 218   | 1833.0441 | 1832.0368 | 1831.9324 | 57  | 1    | <b>R.VMPICLPSKDYIAPGR.V</b> Carbamidomethyl                    |
| 219 - 227   | 980.5405  | 979.5333  | 979.4876  | 47  | 0    | <b>R.VGYVSGWGR.N</b> ( <a href="#">Ions score 39</a> )         |
| 239 - 249   | 1278.6979 | 1277.6906 | 1277.6326 | 45  | 0    | <b>K.YVMLPVADQDK.C</b> ( <a href="#">Ions score 37</a> )       |
| 333 - 346   | 1635.8950 | 1634.8877 | 1634.7974 | 55  | 1    | <b>R.ATDLKDWVQETMAK.N</b> ( <a href="#">Ions score 26</a> )    |





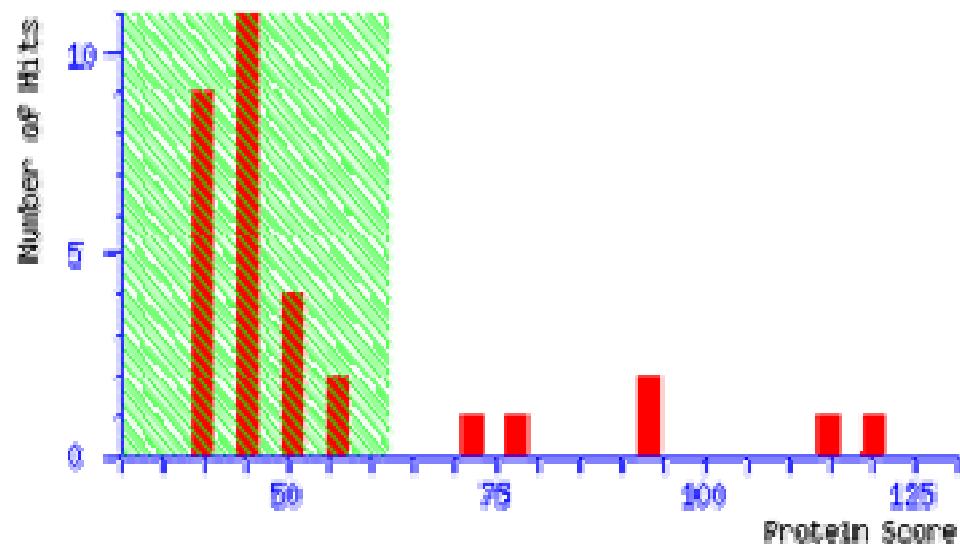

## Concise Protein Summary Report

Format As

Concise Protein Summary

[Help](#)

Significance threshold  $p <$

Max. number of hits

- [Q32P18 MOUSE](#)    **Mass:** 223203    **Score:** 120    **Expect:** 9.2e-08    **Matches:** 95  
 Myosin, heavy polypeptide 1, skeletal muscle, adult.- Mus musculus (Mouse).

[Q9ESW6 MOUSE](#)    **Mass:** 54545    **Score:** 40    **Expect:** 9.2    **Matches:** 31  
 Myosin heavy chain IIX (Fragment).- Mus musculus (Mouse).

# Protein View

Match to: **Q32P18\_MOUSE** Score: 120 Expect: 9.2e-08  
**Myosin, heavy polypeptide 1, skeletal muscle, adult.- Mus musculus (Mouse)**  
Found in search of pmf\_G2\_129990848906.txt

Nominal mass (M<sub>r</sub>): 223203; Calculated pI value: 5.60

NCBI BLAST search of **Q32P18\_MOUSE** against nr

Unformatted [sequence string](#) for pasting into other applications

Taxonomy: [Mus musculus](#)

Links to retrieve other entries containing this sequence from NCBI Entrez

(no taxonomy information for this entry)

(no taxonomy information for this entry)

(no taxonomy information for this entry)

Variable modifications: Carbamidomethyl (C), Deamidated (NQ), Oxidation (M)

Cleavage by Trypsin: cuts C-term side of KR unless next residue is P

Number of mass values searched: 167

Number of mass values matched: 95

Sequence Coverage: 48%

Matched peptides shown in **Bold Red**

|      |                    |                   |                   |                    |                   |
|------|--------------------|-------------------|-------------------|--------------------|-------------------|
| 1    | <b>MSSDAEMAVF</b>  | <b>GEAAPYLKRS</b> | EKERIEAQNK        | PFDAKSSVFV         | VDAKESFVKA        |
| 51   | <b>TVQSREGGKV</b>  | TAKTEGGTIV        | TVKDDQVYPM        | NPPKYDKIED         | MAMMTHLHEP        |
| 101  | AVLYNLKERY         | AAWMIYTYSG        | LFCVTVNPKY        | WLPVYNAEVV         | AAYRGGKKRQE       |
| 151  | APPHIFSID          | NAYQFMGLDR        | ENQISILITGE       | SGAGKTVNTK         | RVIQYFATIA        |
| 201  | VTGKKKKEEA         | <b>TSGKMQGTLR</b> | <b>DQIISANPLL</b> | <b>EAFGNACTVR</b>  | NDNSSRFGKF        |
| 251  | IRIHFGTITGK        | LASADIETYL        | LEKSRVTFQL        | <b>KAERSYHIFY</b>  | <b>QIMSNKKPDL</b> |
| 301  | IEMLLITINP         | YDYAFVSQGE        | ITVPSIDDQE        | ELMATDSAID         | ILGFTSDERV        |
| 351  | SIYKLTGAVM         | HYGNMKFKQK        | QREEQAEPDG        | TEVADKAAYL         | <b>QNLNSADLLK</b> |
| 401  | <b>ALCYPRVKVG</b>  | <b>NEYVTKGQTV</b> | <b>QQVYNSVGAL</b> | <b>AKAVYEKMFEL</b> | <b>WMVTRINQQL</b> |
| 451  | DTKQPRQYFI         | GVLDIAGFEI        | FDFNLSLEQLC       | INFTNEKLQQ         | <b>FFNHHMFVLE</b> |
| 501  | <b>QEEYKKEGIE</b>  | WEFIDFGMDL        | AACIELIEKF        | MGIFSILEEE         | CMFPKATDTS        |
| 551  | FKNKLYEQHL         | <b>GKSNNFQKPK</b> | <b>PAKGGVEAHF</b> | SLVHYAGTVD         | YNIAGWLDKN        |
| 601  | <b>KDPLNETVVG</b>  | <b>LYQKSSMKTL</b> | AYLFSGAAAA        | AEAESGGGGG         | KKGAKKKGSS        |
| 651  | FQTVSALFRE         | NLNKLMTNLR        | STHPHFVRCI        | IFNETKTPGA         | <b>MEHELVLHQL</b> |
| 701  | <b>RCNGVLEGIR</b>  | ICRKGFPRI         | <b>LYADFKQRYK</b> | <b>VLNASAPEG</b>   | <b>QFIDSKKASE</b> |
| 751  | KLLGSIDIDH         | <b>TQYKFGHTKV</b> | FFKAGLLGLL        | EEMRDDKLAQ         | <b>LITRTQAMCR</b> |
| 801  | <b>GYLARVEYQK</b>  | <b>MVERRESIFC</b> | IQYNVRAFMN        | <b>VKHWPWMKLY</b>  | FKIKPLLKSA        |
| 851  | ETEKEMANMK         | EFEKAKENL         | AKAEAKRKL         | <b>EAKMVALMQE</b>  | <b>KNDLQLQVQS</b> |
| 901  | <b>EADSLADAEK</b>  | <b>RCDQLIKTKI</b> | QLEAKIKEVT        | ERADEEEEIN         | AELTAKKRKL        |
| 951  | EDECSLKKD          | <b>IDDLLETLAK</b> | <b>VEKEKHATEN</b> | <b>KVKNLTEEMA</b>  | <b>GLDETIAKLT</b> |
| 1001 | <b>KEKKAHQEAH</b>  | <b>QOTLDDLQAE</b> | <b>EDKVNTLTKA</b> | KIKLEQQVDD         | <b>LEGSLEQEKK</b> |
| 1051 | <b>IRMDLERAKR</b>  | KLEGLDLKLAQ       | ESTMDVENDK        | QQLDEKLLKKK        | <b>EFEMSNLQSK</b> |
| 1101 | <b>IEDEQALGMO</b>  | <b>LQKKIKELQA</b> | <b>RIELEEIE</b>   | <b>AERASRAKAE</b>  | KQRSLSREL         |
| 1151 | EEISERLEEA         | <b>GGATSAQIEM</b> | <b>NKKREAEFQK</b> | <b>MRRDLEEATL</b>  | <b>QHEATAATLR</b> |
| 1201 | <b>KKHADSVDEL</b>  | <b>GEQIDNLQRV</b> | KQKLEKEKSE        | MKMEIDDLAS         | NMEVISKSKG        |
| 1251 | NLEKMCRTLE         | <b>DQVSELKTKE</b> | <b>EEQRLINEL</b>  | <b>TAQRGRLQTE</b>  | <b>SGEYSRQDLE</b> |
| 1301 | <b>KDSLVSQLSR</b>  | <b>GKQAFQQIE</b>  | <b>ELKRQLEEEI</b> | <b>KAKSALAHAL</b>  | <b>QSSRHDCDLL</b> |
| 1351 | <b>REQYEEEQEA</b>  | <b>KAELQRAMSK</b> | <b>ANSEVAQWRT</b> | <b>KYETDAIQRT</b>  | <b>EELEEAKKKL</b> |
| 1401 | <b>AQRHQDAEEH</b>  | <b>VEAVNAKCAS</b> | <b>LEKTKQRLQN</b> | <b>EVEDLMIDVE</b>  | <b>RTNAACAALD</b> |
| 1451 | <b>KKQRNFDKIL</b>  | <b>AEWKQKYEET</b> | <b>HAELEASQKE</b> | <b>SRSLSLELTK</b>  | <b>IKNAYEESLD</b> |
| 1501 | HLETLKRENK         | <b>NLQQEISDLT</b> | <b>EQIAEGGKRI</b> | HELEKIKKQI         | <b>EQEKSELQAA</b> |
| 1551 | LEEAEASLEH         | EESKILRIQL        | <b>ELNQVKSEID</b> | RKIAEKDEEI         | <b>DQLKRNHIRV</b> |
| 1601 | VESMQSTLDA         | EIRSRNDAIR        | LKKKMEGDLN        | <b>EMEIQLNHSN</b>  | <b>RMAAEALRNY</b> |
| 1651 | <b>RNTQGIKDOT</b>  | <b>QLHLDDALRG</b> | <b>QEDLKEQLAM</b> | <b>VERRANLLQA</b>  | <b>EIEELRATLE</b> |
| 1701 | <b>QTERSRIKIAE</b> | <b>QELLDASERV</b> | <b>QLLHTQNTSL</b> | <b>INTKKKLETD</b>  | <b>ISQIQGEMED</b> |
| 1751 | <b>IVQEARNAAE</b>  | <b>KAKKAITDAA</b> | <b>MMAEELKKEQ</b> | DTSAHLERMK         | <b>KNLEQTVKDL</b> |
| 1801 | QHRLEDAEQL         | ALKGGKKQIQ        | <b>KLEAEVRELE</b> | <b>GEVENEQKRN</b>  | VEAIKGLRKH        |
| 1851 | ERRVKELTYQ         | TEEDRKNVLR        | LQDLVDKLOS        | KVKAYKROAE         | EABEQSNVNL        |
| 1901 | AKFR <b>KIQHEL</b> | <b>EAEERADIA</b>  | ESQVKNLQV         | SREVHTKIIS         | EE                |

# M7

4700 MS/MS Precursor 1057.65 Spec #1 MC[BP = 70.1, 2748]

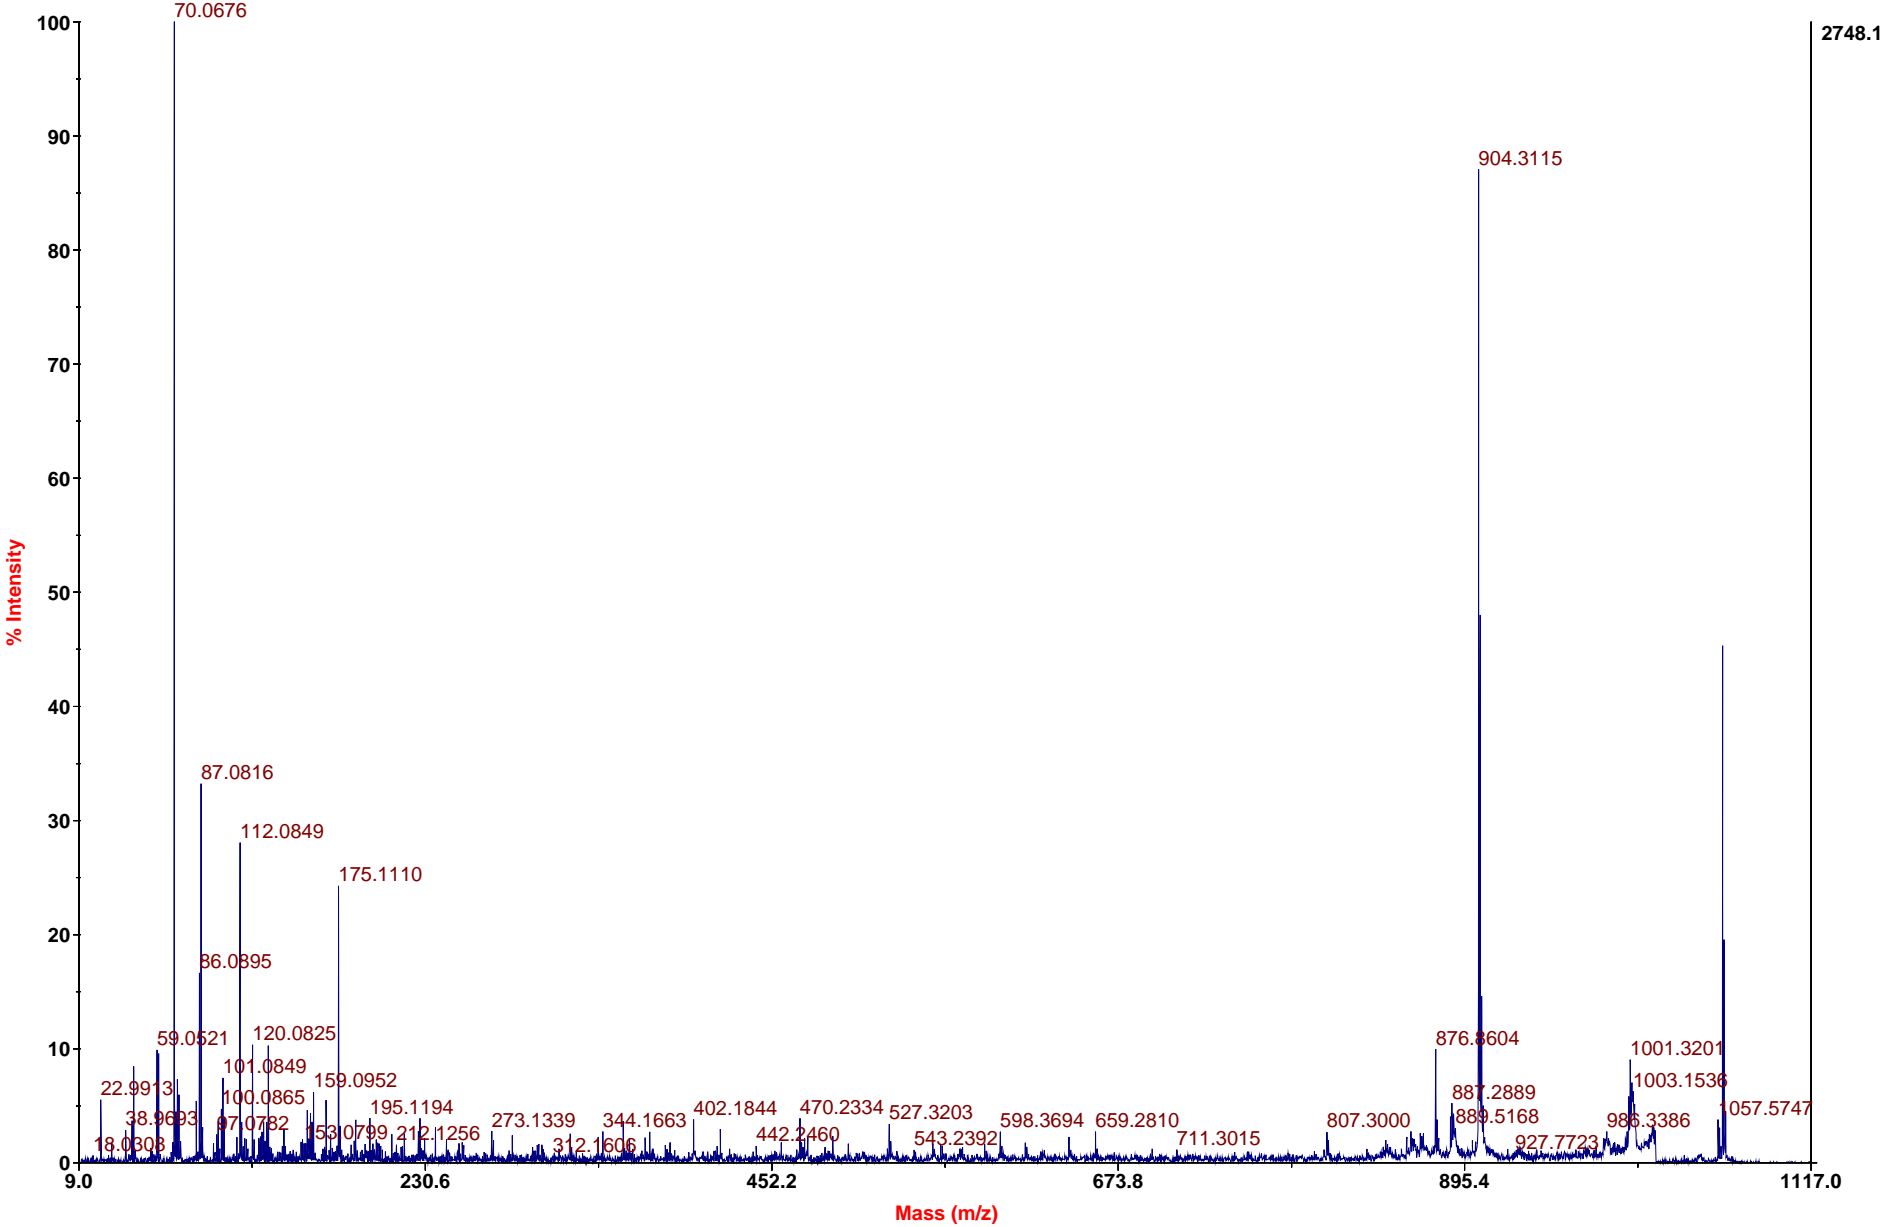

# M7

4700 MS/MS Precursor 928.478 Spec #1 MC[BP = 110.1, 1013]

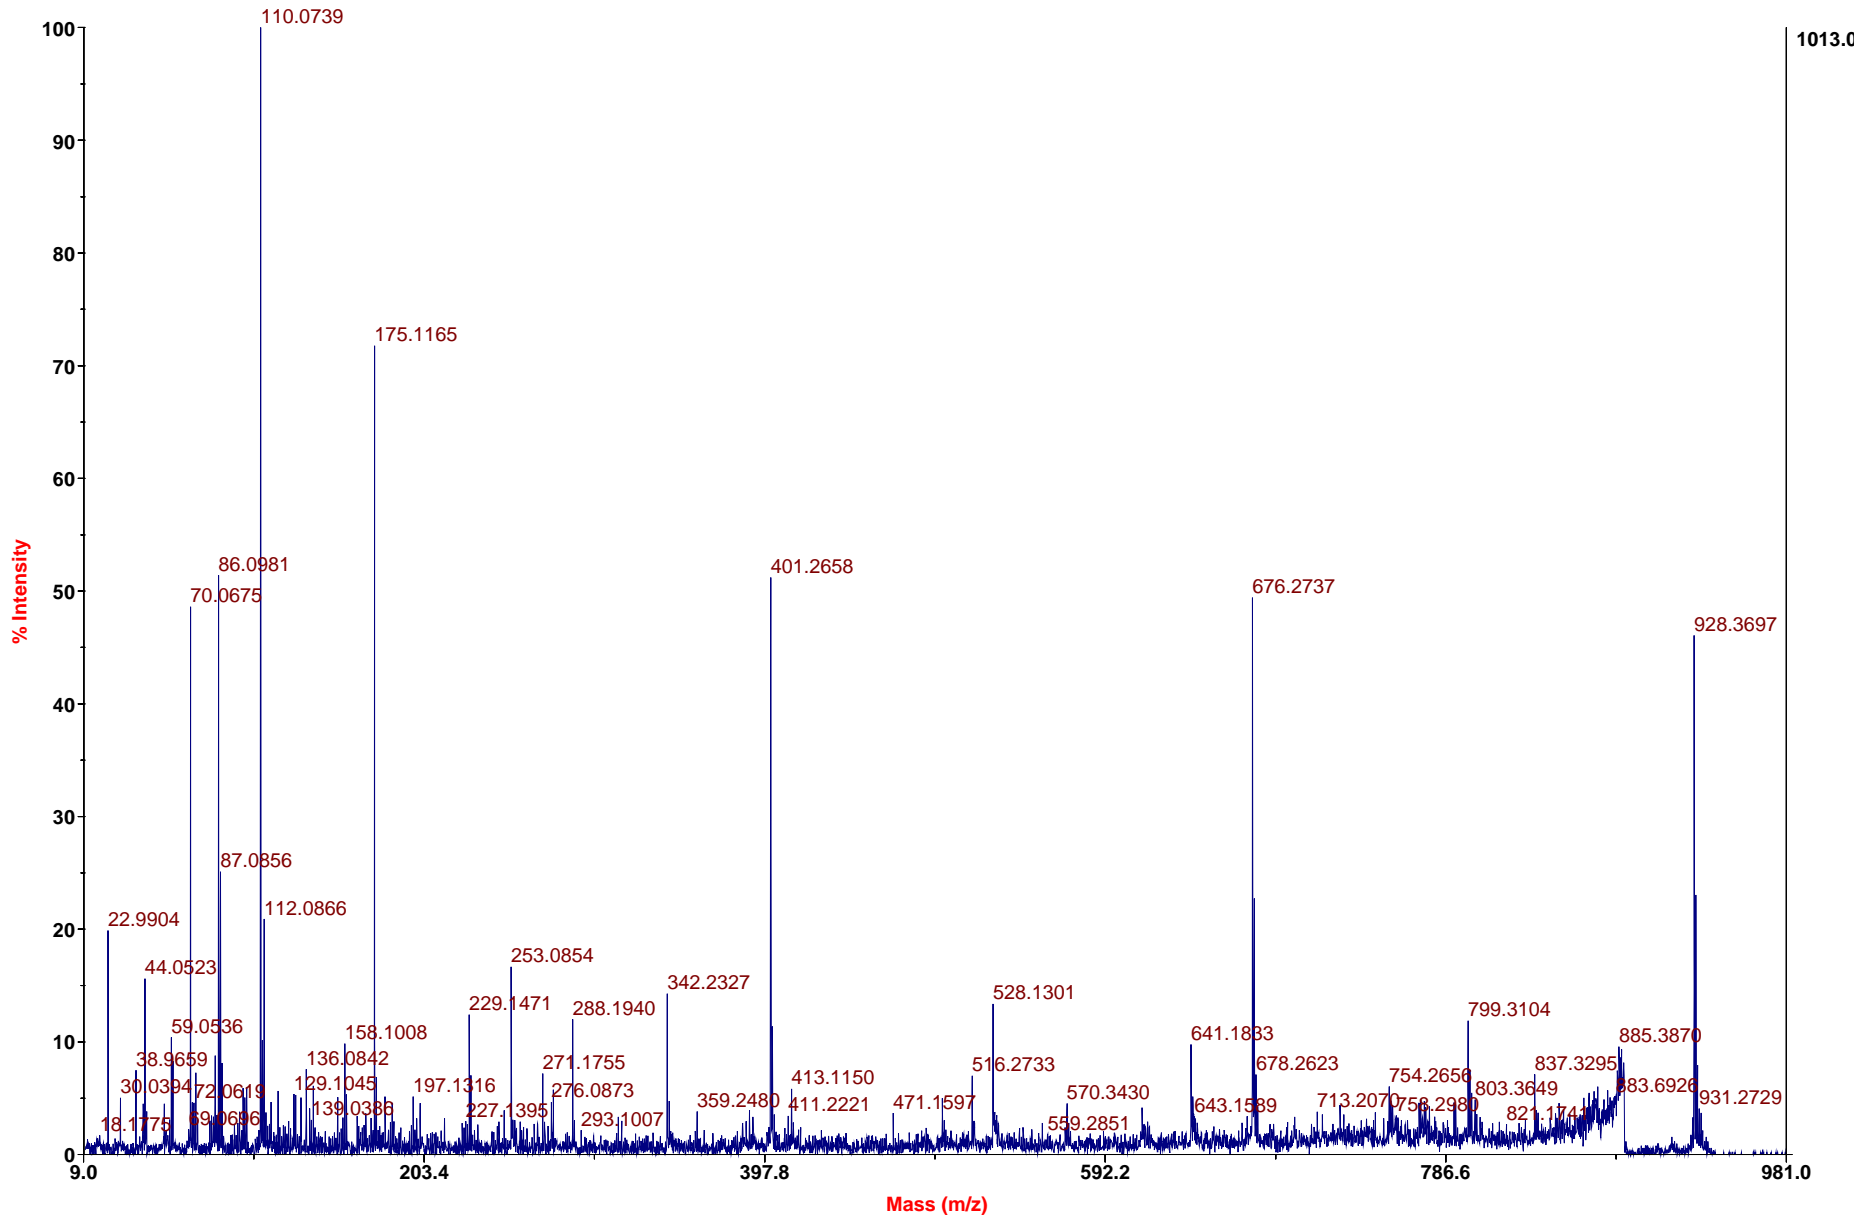

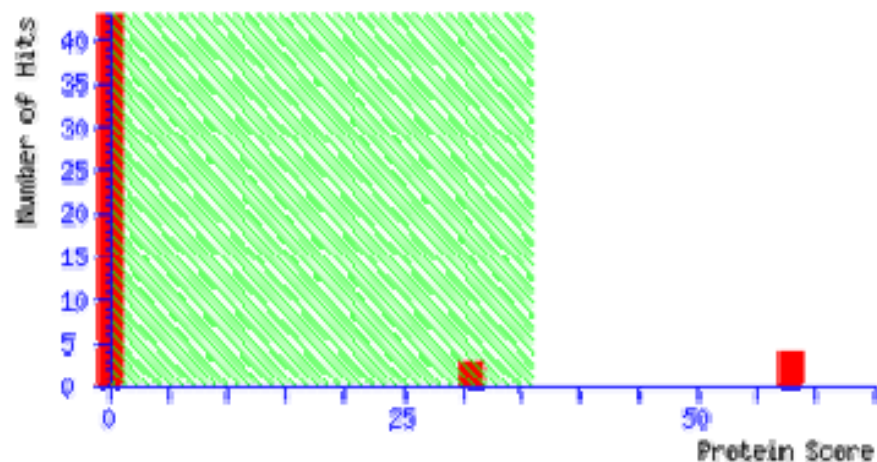

## Peptide Summary Report

Format As

Peptide Summary

[Help](#)

Significance threshold  $p <$

Max. number of hits

Standard scoring  MudPIT scoring  Ions score or expect cut-off

Show sub-sets

Show pop-ups  Suppress pop-ups  Sort unassigned

Require bold red

Select All

Select None

Search Selected

Error tolerant

1. [O9JHR4 MOUSE](#) Mass: 60994 Score: 58 Matches: 1(1) Sequences: 1(1) emPAI: 0.10  
Myosin heavy chain IIB (Fragment).- Mus musculus (Mouse).

Check to include this hit in error tolerant search

| Query                                                  | Observed  | Mr(expt)  | Mr(calc)  | ppm  | Miss | Score | Expect  | Rank | Unique | Peptide            |
|--------------------------------------------------------|-----------|-----------|-----------|------|------|-------|---------|------|--------|--------------------|
| <input checked="" type="checkbox"/> <a href="#">15</a> | 1702.9291 | 1701.9218 | 1701.8243 | 57.3 | 0    | 58    | 0.00046 | 1    |        | R.LQNEVEDLMIDVER.S |

# Protein View

Match to: [Q9JHR4\\_MOUSE](#) score: 58

**Myosin heavy chain IIB (Fragment).** - **Mus musculus (Mouse)** .

Found in search of ppw\_G2\_129990854806.txt

Nominal mass ( $M_r$ ): **60994**; Calculated pI value: 5.38

NCBI BLAST search of [Q9JHR4\\_MOUSE](#) against nr

Unformatted [sequence string](#) for pasting into other applications

Taxonomy: [Mus musculus](#)

Links to retrieve other entries containing this sequence from NCBI Entrez:  
(no taxonomy information for this entry)

Variable modifications: Carbamidomethyl (C), Deamidated (NQ), Oxidation (M)

Cleavage by Trypsin: cuts C-term side of KR unless next residue is P

Sequence Coverage: 2%

Matched peptides shown in **Bold Red**

```
  1 SLEKTKQRLQ NEVEDLMIDV ERSNAACAAL DKKQRNFDKV LAEWKQKYEE
 51 TQAELEASQK ESRSLSTELF KVKNAYEESL DQLETLKREN KNLQQEISDL
101 TEQIAEGGKH IHELEKIKKQ IDQEKSELQA SLEEA EASLE HEEGKILRIQ
151 LELNQVKSEI DRKIAEKDEE IDQLKRNHLR VVESMQSTLD AEIRSRNDAL
201 RIKKKMEGDL NEMEIQLNHA NRQAAEAIRN LRNTQGMLKD TQLHLDDALR
251 GQDDLKEQLA MVERRANLMQ AEIEELRASL EQTERSRRVA EQELLDASER
301 VQLLHTQNTS LINTKKKLET DISQIQGEME DIVQEARNAE EKAKKAITDA
351 AMMAEELKKE QD TSAHLERM KKNMEQTVKD LQHR LDEAEQ LALKGGKKQI
401 QKLEARVREL ENEVENEQKR NIEAVKGLRK HERRVKELTY QTEEDRKNVL
451 RLQDLVDKLQ TKVKAYKRQA EEAE EQSNVN LAKFRKIQHE LEEAEERADI
501 AESQVNKLRV KSRE VHTKVI SEE
```

Sample M8

4700 Reflector Spec #1 MC=>NR(2.00)[BP = 1558.0, 16431]

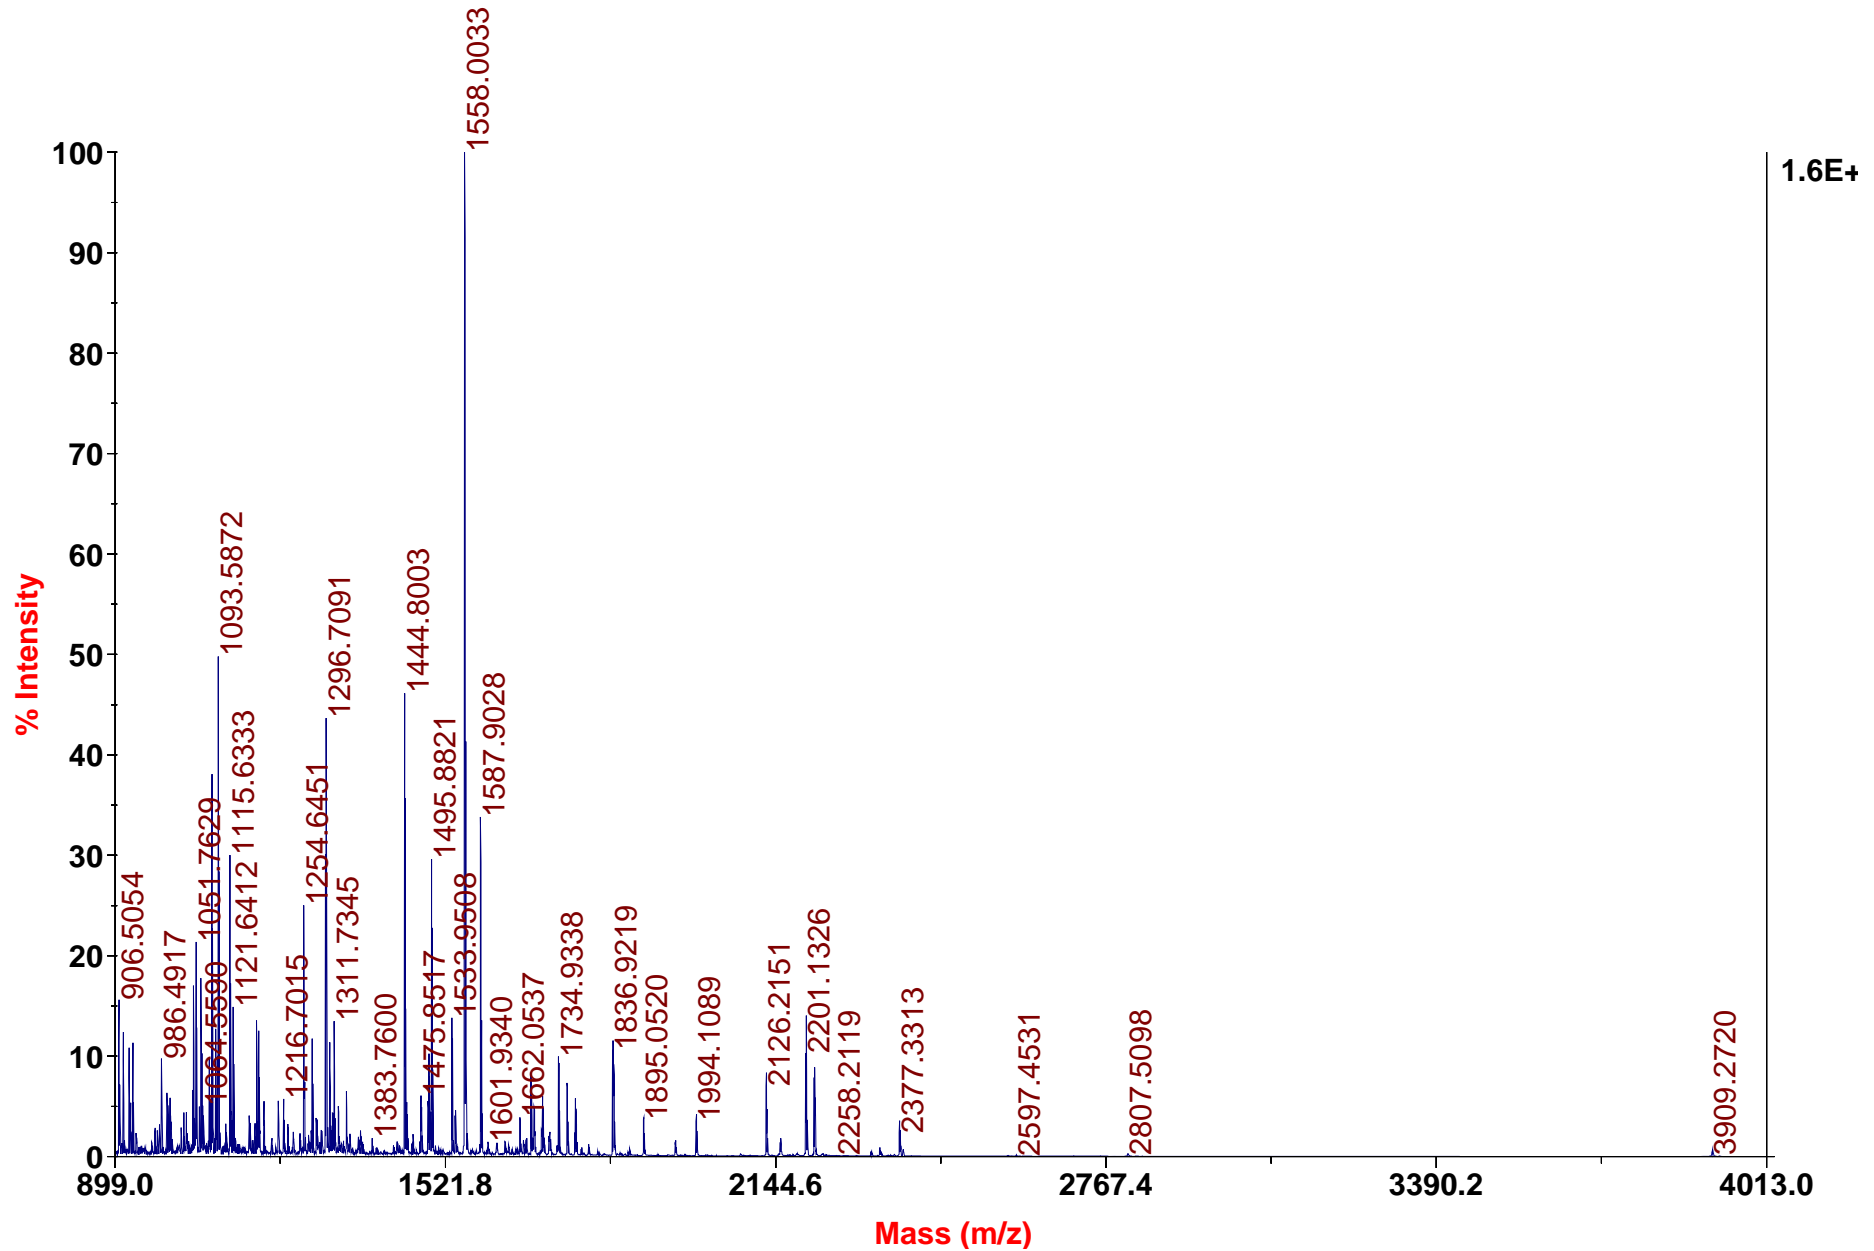

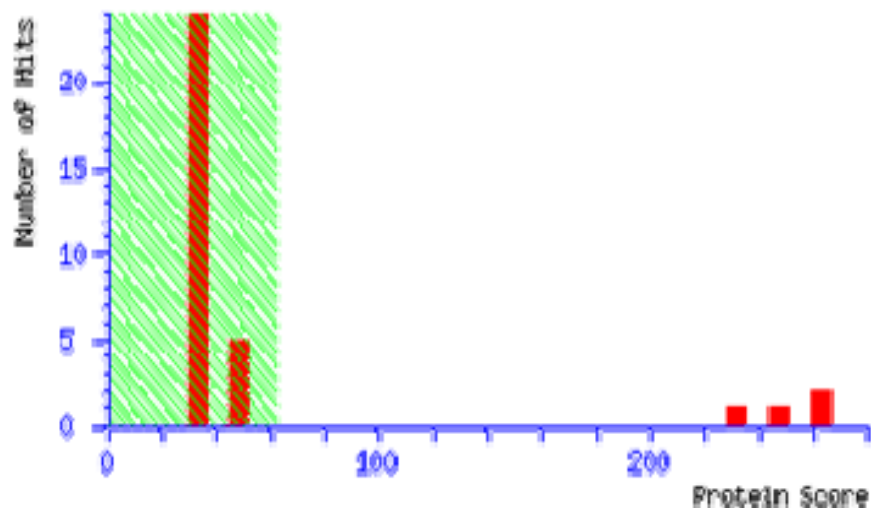

## Concise Protein Summary Report

Format As

Concise Protein Summary

[Help](#)

Significance threshold  $p <$

Max. number of hits

1. [CAA69019](#) Mass: 51533 Score: **262** Expect: 5.8e-22 Matches: 65

MMVIMENT NID: - Mus musculus

[Q3UD36 MOUSE](#) Mass: 47148 Score: **213** Expect: 4.6e-17 Matches: 61

Bone marrow macrophage cDNA, RIKEN full-length enriched library, clone:I830001B16 product:vimentin,

[BAC28181](#) Mass: 17978 Score: **69** Expect: 0.011 Matches: 25

AK033175 NID: - Mus musculus



# Protein View

Match to: **CAA69019** score: 262 Expect: 5.8e-22

MMVIMENT NID: - Mus musculus

Found in search of pmf\_H2\_129990848907.txt

Nominal mass ( $M_r$ ): 51533; Calculated pI value: 4.96

NCBI BLAST search of [CAA69019](#) against nr

Unformatted [sequence string](#) for pasting into other applications

Taxonomy: [Mus musculus](#)

Variable modifications: Carbamidomethyl (C), Deamidated (NQ), Oxidation (M)

Cleavage by Trypsin: cuts C-term side of KR unless next residue is P

Number of mass values searched: 162

Number of mass values matched: 65

Sequence Coverage: 89%

Matched peptides shown in **Bold Red**

```
1  SSRPSSNRSY VTTSTRITYSL GSALRPSTSR SLYSSSPGGA YVTRSSAVRL
51  RSSVPGVRL  QDSVDFSLAD AINTEFKNTR TNEKVELQEL NDRFANYIDK
101 VRFLEQQNKI LLAELEQLKG QGKSRLGDLY EEEMRELRRQ VDQLTNDKAR
151 VEVERDNLAE DIMRLREKLQ EEMLQREEAE STLQSFQDV DNASLARLDL
201 ERKVESLQEE IAFLKKLHDE EIQELQAQIQ EQHVQIDVDV SKPDLTAALR
251 DVRQQYESVA AKNLQEAEEW YKSKFADLSE AANRNNDALR QAKQESNEYR
301 RQVQSLTCEV DALKGTNESL ERQMRMEEN FALEAANYQD TIGRLQDEIQ
351 NMKEEMARHL REYQDLLNVK MALDIEIATY RKLLEGEESR ISLPLPTFSS
401 LNLRETNLES LPLVDTHSKR TLLIKTVETR DGQVINETSQ HHDDLE
```

Show predicted peptides also

Sort Peptides By

Residue Number  Increasing Mass  Decreasing Mass

| Start | End | Observed  | Mr(expt)  | Mr(calc)  | ppm | Miss | Sequence                        |
|-------|-----|-----------|-----------|-----------|-----|------|---------------------------------|
| 9     | 16  | 914.5060  | 913.4988  | 913.4505  | 53  | 0    | R. SYVTTSTR. T                  |
| 17    | 30  | 1495.8798 | 1494.8725 | 1494.7790 | 63  | 0    | R. TYSLGSALRPSTSR. S            |
| 31    | 44  | 1444.7979 | 1443.7906 | 1443.6994 | 63  | 0    | R. SLYSSSPGGAYVTR. S            |
| 59    | 77  | 2126.2109 | 2125.2036 | 2125.0579 | 69  | 0    | R. LLQDSVDFSLADAINTEFK. N       |
| 81    | 93  | 1587.9003 | 1586.8930 | 1586.7900 | 65  | 1    | R. TNEKVELQELNDR. F             |
| 85    | 93  | 1115.6313 | 1114.6240 | 1114.5618 | 56  | 0    | K. VELQELNDR. F                 |
| 94    | 102 | 1125.6686 | 1124.6613 | 1124.5978 | 56  | 1    | R. FANYIDKVR. F                 |
| 101   | 109 | 1162.6250 | 1161.6177 | 1161.6142 | 3   | 1    | K. VRFLEQQNK. I Deamidated (NQ) |
| 103   | 109 | 906.5054  | 905.4981  | 905.4607  | 41  | 0    | R. FLEQQNK. I                   |
| 103   | 109 | 908.4515  | 907.4443  | 907.4287  | 17  | 0    | R. FLEQQNK. I 2 Deamidated (NQ) |
| 110   | 119 | 1169.7764 | 1168.7691 | 1168.7067 | 53  | 0    | K. ILLAELEQLK. G                |
| 110   | 123 | 1540.0065 | 1538.9992 | 1538.9032 | 62  | 1    | K. ILLAELEQLKGQK. S             |

# M8

4700 MS/MS Precursor 1295.74 Spec #1 MC[BP = 175.1, 2445]

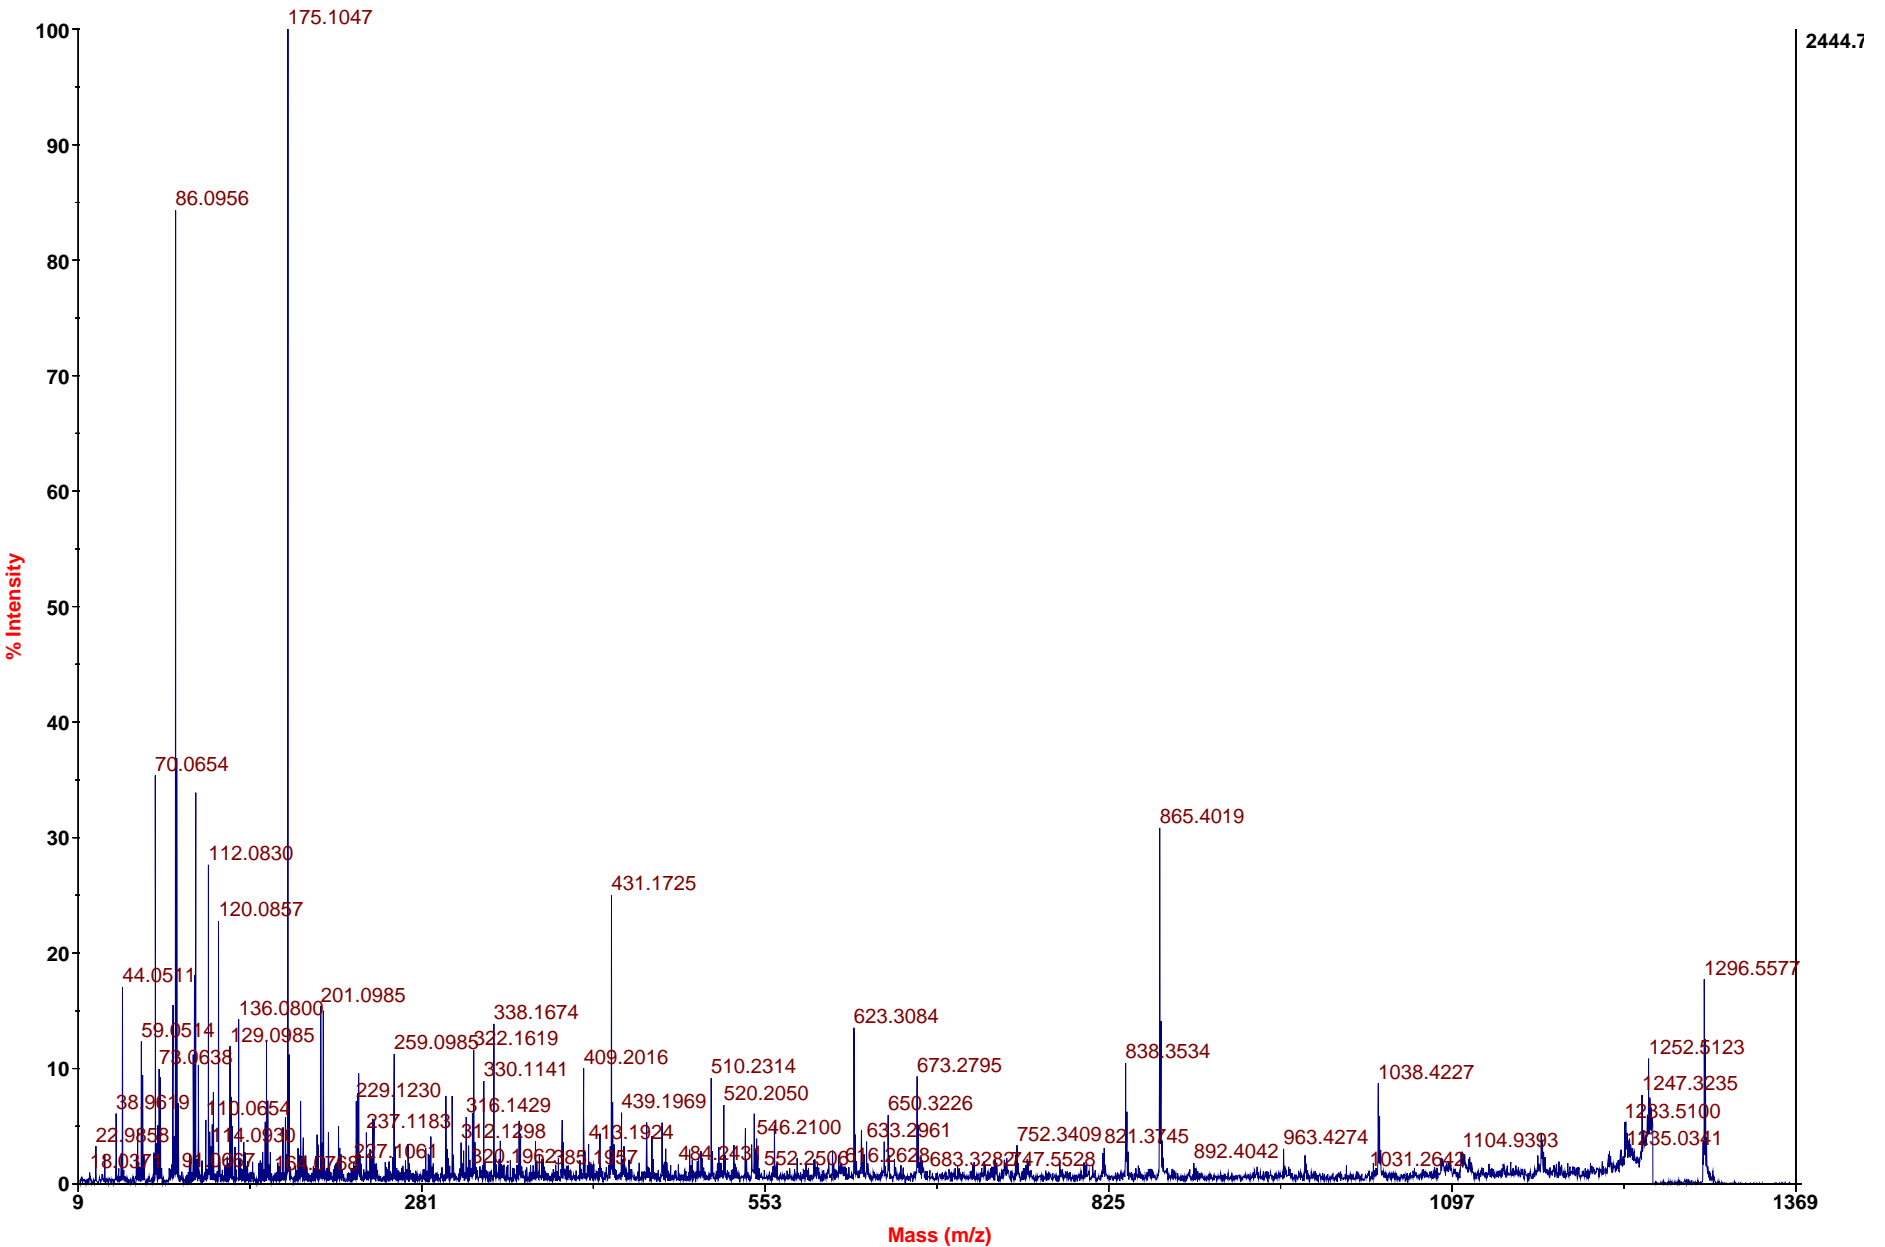

# M8

4700 MS/MS Precursor 1051.76 Spec #1 MC[BP = 102.1, 2153]

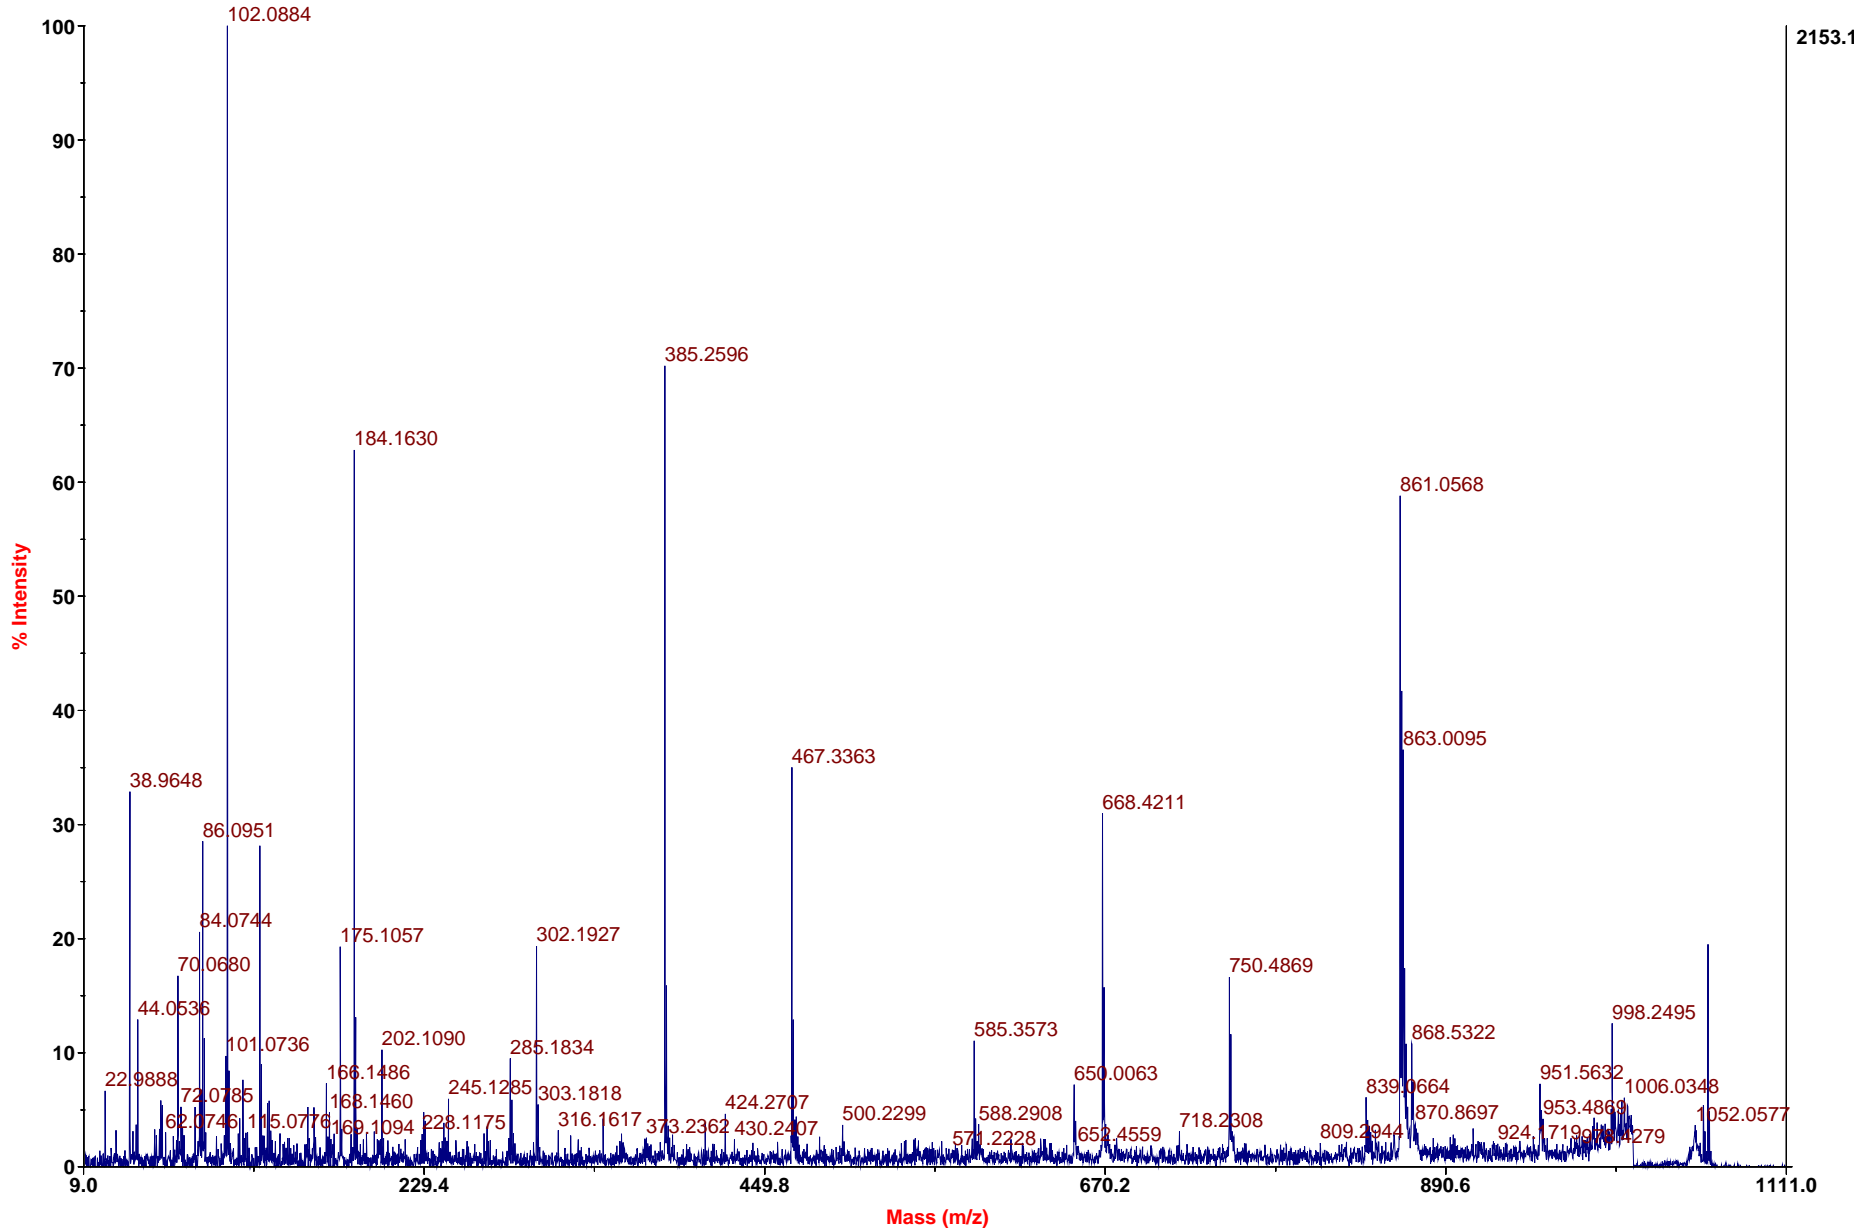

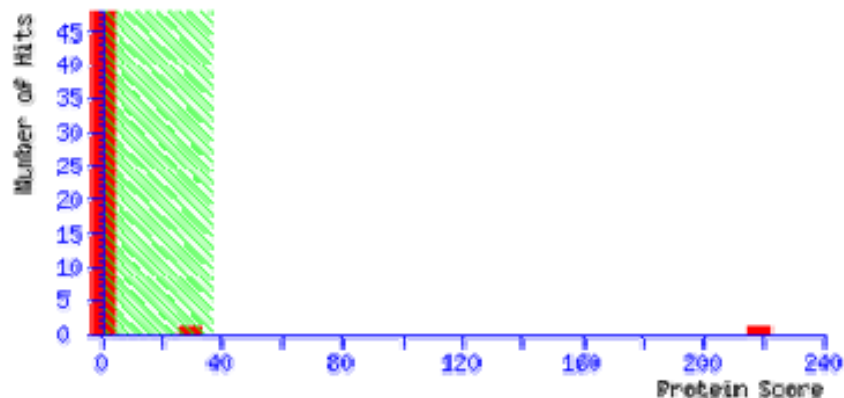

## Peptide Summary Report

Format As

Peptide Summary

[Help](#)

Significance threshold  $p <$

Max. number of hits

Standard scoring  MudPIT scoring

Ions score or expect cut-off

Show sub-sets

Show pop-ups  Suppress pop-ups

Sort unassigned

Require bold red

Select All

Select None

Search Selected

Error tolerant

1. [VIME MOUSE](#) Mass: 53524 Score: 219 Matches: 18(9) Sequences: 15(8) emPAI: 2.82

Vimentin.- Mus musculus (Mouse).

Check to include this hit in error tolerant search

| Query                                                 | Observed  | Mr(expt)  | Mr(calc)  | ppm  | Miss | Score | Expect | Rank | Unique | Peptide                    |
|-------------------------------------------------------|-----------|-----------|-----------|------|------|-------|--------|------|--------|----------------------------|
| <input checked="" type="checkbox"/> <a href="#">1</a> | 914.5060  | 913.4988  | 913.4505  | 52.8 | 0    | 23    | 1.2    | 1    | U      | R.SYVTTSTR.T               |
| <input checked="" type="checkbox"/> <a href="#">3</a> | 1081.5625 | 1080.5552 | 1080.4948 | 55.9 | 1    | 17    | 4.9    | 1    | U      | K.QESNEYRR.Q               |
| <input checked="" type="checkbox"/> <a href="#">4</a> | 1093.5869 | 1092.5796 | 1092.5200 | 54.6 | 0    | 48    | 0.005  | 1    | U      | K.FADLSEAANR.N             |
| <input checked="" type="checkbox"/> <a href="#">5</a> | 1115.6313 | 1114.6240 | 1114.5618 | 55.8 | 0    | 31    | 0.2    | 1    | U      | K.VELQELNDR.F              |
| <input checked="" type="checkbox"/> <a href="#">7</a> | 1254.6449 | 1253.6376 | 1253.5598 | 62.1 | 0    | 38    | 0.044  | 1    | U      | R.LGDLYEEEMR.E             |
| <input checked="" type="checkbox"/> <a href="#">8</a> | 1270.6376 | 1269.6303 | 1269.5547 | 59.6 | 0    | (12)  | 21     | 1    | U      | R.LGDLYEEEMR.E + Oxidation |
| <input checked="" type="checkbox"/> <a href="#">9</a> | 1295.7449 | 1294.7376 | 1294.6591 | 60.7 | 0    | 31    | 0.16   | 1    | U      | K.MALDIEIATYR.K            |

# Protein View

Match to: **VIME\_MOUSE** Score: 219  
Vimentin.- *Mus musculus* (Mouse).  
Found in search of ppw\_H2\_129990854907.txt

Nominal mass ( $M_r$ ): 53524; Calculated pI value: 5.06  
NCBI BLAST search of [VIME\\_MOUSE](#) against nr  
Unformatted [sequence string](#) for pasting into other applications

Taxonomy: [Mus musculus](#)

Variable modifications: Carbamidomethyl (C), Deamidated (NQ), Oxidation (M)  
Cleavage by Trypsin: cuts C-term side of KR unless next residue is P  
Sequence Coverage: 38%

Matched peptides shown in **Bold Red**

```
1 STRSVSSSSY RRMFGGSGTS SRPSSNRSYV TTSTRTYSLG SALRPSTSR
51 LYSSSPGGAY VTRSSAVRLR SSVPGVRLIQ DSVDFSLADA INTEFKNTRT
101 NEKVELQELN DRFANYIDKV RFLEQQNKIL LAELEQLKGQ GKSRLGDLYE
151 EEMRELRRQV DQLTNDKARV EVERDNLAED IMRLREKLQE EMLQREEAES
201 TLQSFQRQVD NASLARLDLE RKVESLQEEI AFLKKLHDEE IQELQAQIQE
251 QHVQIDVDVS KPDLTAALRD VRQYYESVAA KNLQEAEEWY KSKFADLSEA
301 ANRNNDALRQ AKQESNEYRR QVQSLTCEVD ALKGTNESLE RQMREMEENF
351 ALEAANYQDT IGRLODEIQN MKEEMARHLR EYQDLLNVKM ALDIEIATYR
401 KLEGEESRI SLPLPTFSSL NLRETNLESL PLVDTHSKRT LLIKTIVETRD
451 GQVINETSQH HDDLE
```

Show predicted peptides also

Sort Peptides By

Residue Number  Increasing Mass  Decreasing Mass

| Start - End | Observed  | Mr(expt)  | Mr(calc)  | ppm | Miss | Sequence                                                         |
|-------------|-----------|-----------|-----------|-----|------|------------------------------------------------------------------|
| 28 - 35     | 914.5060  | 913.4988  | 913.4505  | 53  | 0    | R. SYVTTSTR. T ( <a href="#">Ions score 23</a> )                 |
| 36 - 49     | 1495.8798 | 1494.8725 | 1494.7790 | 63  | 0    | R. TYSLGSALRPSTSR. S ( <a href="#">Ions score 9</a> )            |
| 50 - 63     | 1444.7979 | 1443.7906 | 1443.6994 | 63  | 0    | R. SLYSSSPGGAYVTR. S ( <a href="#">Ions score 24</a> )           |
| 100 - 112   | 1587.9003 | 1586.8930 | 1586.7900 | 65  | 1    | R. TNEKVELQELNDR. F ( <a href="#">Ions score 47</a> )            |
| 104 - 112   | 1115.6313 | 1114.6240 | 1114.5618 | 56  | 0    | K. VELQELNDR. F ( <a href="#">Ions score 31</a> )                |
| 145 - 154   | 1254.6449 | 1253.6376 | 1253.5598 | 62  | 0    | R. LGDLYEEEMR. E ( <a href="#">Ions score 38</a> )               |
| 145 - 154   | 1270.6376 | 1269.6303 | 1269.5547 | 60  | 0    | R. LGDLYEEEMR. E Oxidation (M) ( <a href="#">Ions score 12</a> ) |
| 222 - 234   | 1533.9507 | 1532.9434 | 1532.8450 | 64  | 1    | R. KVESLQEEIAFLK. K ( <a href="#">Ions score 40</a> )            |
| 284 - 288   | 1222.5212 | 1222.5212 | 1222.5212 | 55  | 0    | K. FADLSEA. S ( <a href="#">Ions score 10</a> )                  |

# Sample M9

4700 Reflector Spec #1 MC=>NR(2.00)[BP = 1558.0, 22567]

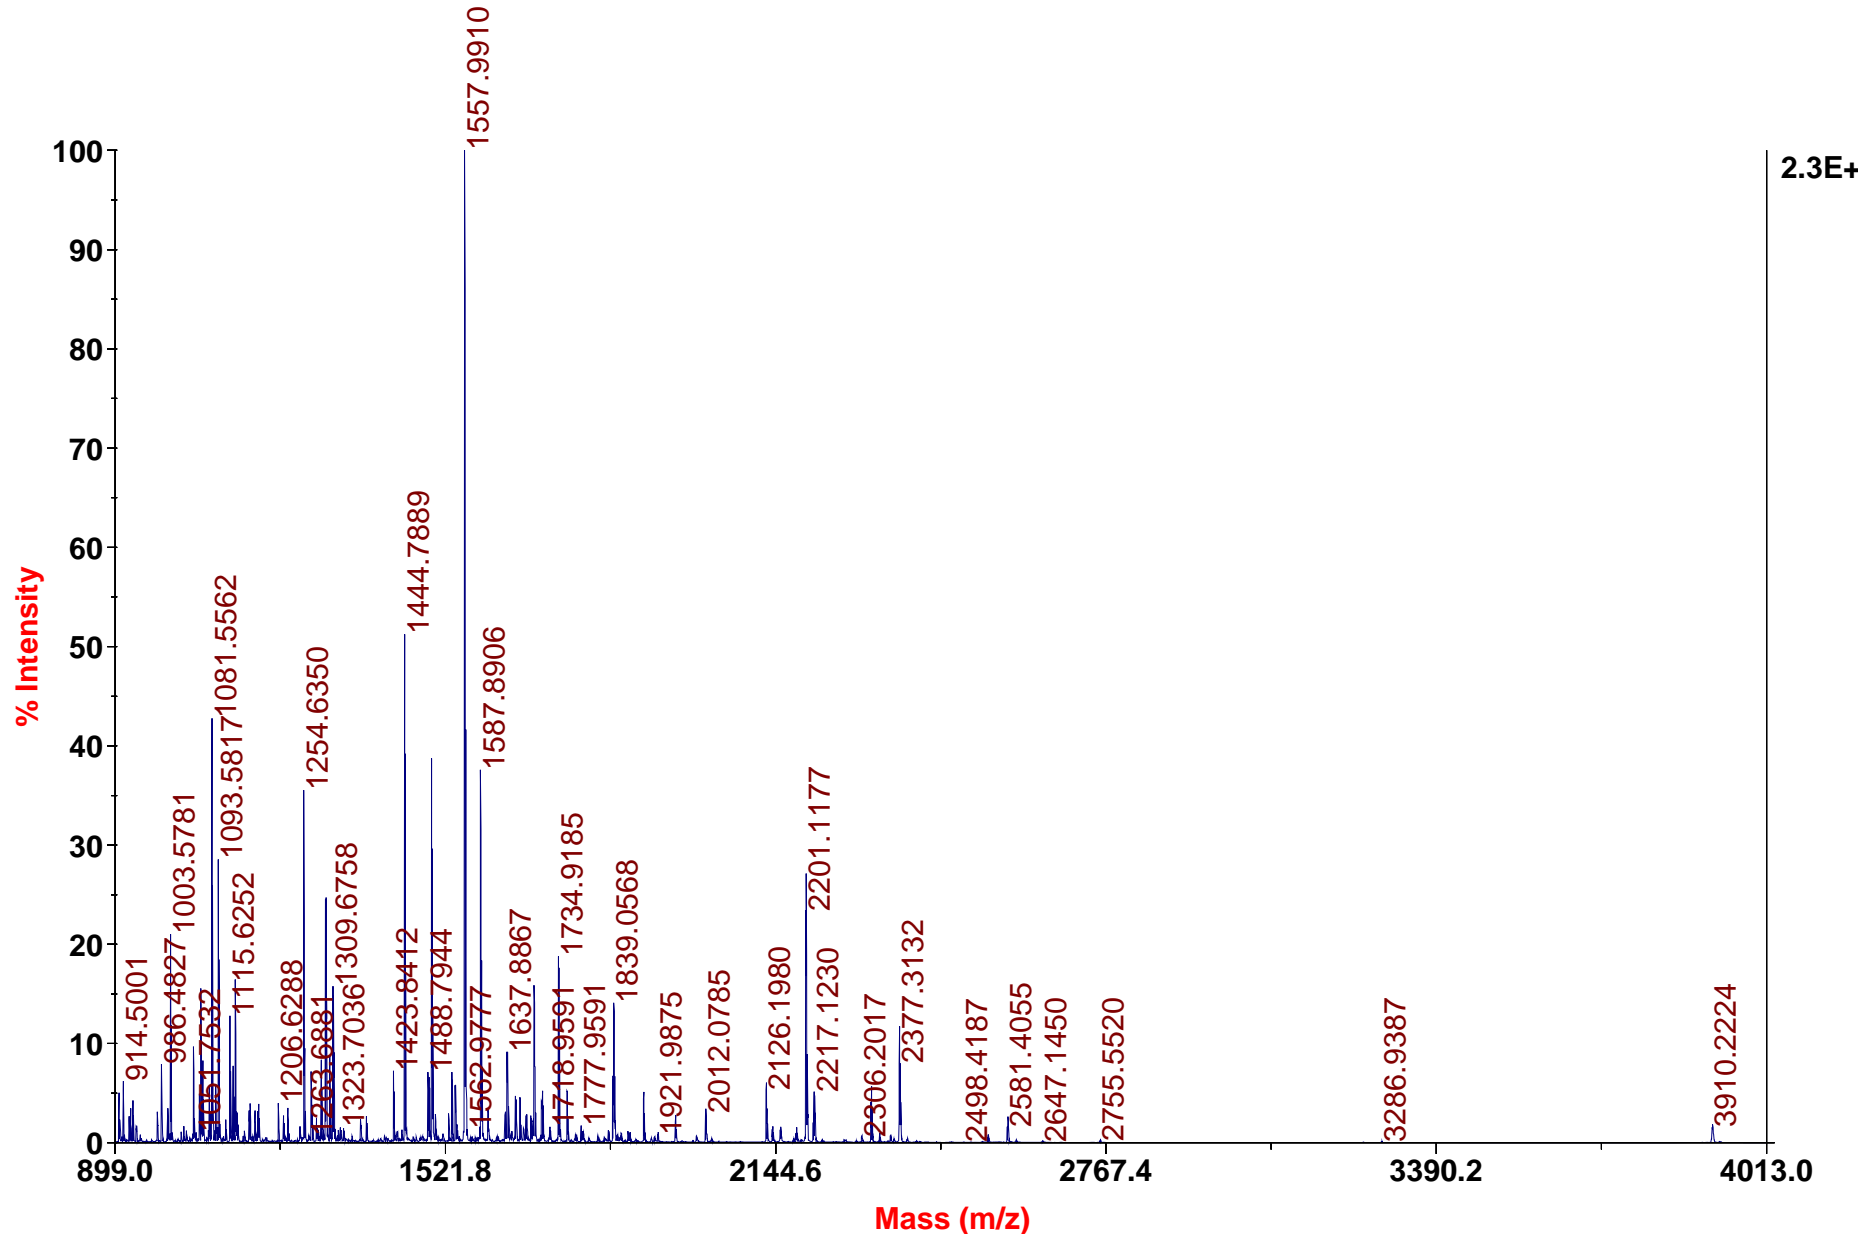

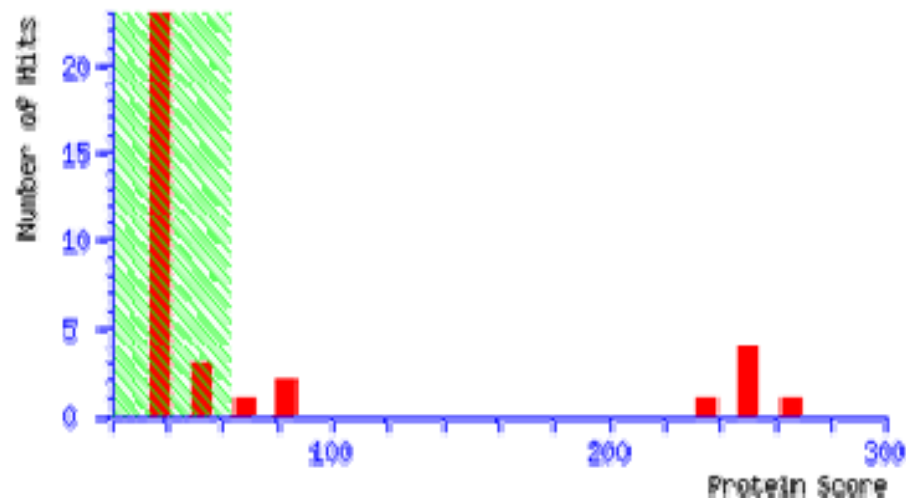

## Concise Protein Summary Report

Format As

Concise Protein Summary

[Help](#)

Significance threshold  $p <$

Max. number of hits

- [Q5FWJ3\\_MOUSE](#)    **Mass:** 53655    **Score:** 265    **Expect:** 2.9e-22    **Matches:** 77  
 Vimentin (NOD-derived CD11c +ve dendritic cells cDNA, RIKEN full-length enriched library, clone:  
[VIME\\_MOUSE](#)    **Mass:** 53524    **Score:** 265    **Expect:** 2.9e-22    **Matches:** 77  
 Vimentin.- Mus musculus (Mouse).  
[CAA69019](#)    **Mass:** 51533    **Score:** 258    **Expect:** 1.5e-21    **Matches:** 75  
 MMVIMENT NID: - Mus musculus  
[Q3TFD9\\_MOUSE](#)    **Mass:** 53656    **Score:** 253    **Expect:** 4.6e-21    **Matches:** 75  
 17 days embryo heart cDNA, RIKEN full-length enriched library, clone:I920087013 product:vimentin,



## Protein View

Match to: [Q5FWJ3\\_MOUSE](#) Score: 265 Expect: 2.9e-22  
Vimentin (NOD-derived CD11c +ve dendritic cells cDNA, RIKEN full-length enriched library,  
Found in search of pmf\_I2\_129990848908.txt

Nominal mass ( $M_r$ ): 53655; Calculated pI value: 5.06  
NCBI BLAST search of [Q5FWJ3\\_MOUSE](#) against nr  
Unformatted [sequence string](#) for pasting into other applications

Taxonomy: [Mus musculus](#)  
Links to retrieve other entries containing this sequence from NCBI Entrez:  
(no taxonomy information for this entry)  
(no taxonomy information for this entry)  
(no taxonomy information for this entry)  
(no taxonomy information for this entry)

Variable modifications: Carbamidomethyl (C), Deamidated (NQ), Oxidation (M)  
Cleavage by Trypsin: cuts C-term side of KR unless next residue is P  
Number of mass values searched: 181  
Number of mass values matched: 77  
Sequence Coverage: 89%

Matched peptides shown in **Bold Red**

```
1 MSTRSVSSSS YRRMFGGSGT SSRPSSNRSY VTTSTRITYSL GSALRPSTSR
51 SLYSSSPGGA YVTRSSAVRL RSSVPGVRL QDSVDFSLAD AINTEFKNTR
101 TNEKVELQEL NDRFANYIDK VRFLEQQNKI LLAELEQLKG QGKSRLGDLY
151 EEEMRELRRQ VDQLTNDKAR VEVERDNLAE DIMRLREKLQ EEMLQREEAE
201 STLQSFQRDV DNASLARLDL ERKVESLQEE IAFLLKLLHDE EIQLQQAQIQ
251 EQHVQIDVDV SKPDLTAALR DVRQQYESVA AKNLQEAEEW YKSKFADLSE
301 AANRNNDALR QAKQESNEYR RQVQSLTCEV DALKGTNESL ERQMREMEEN
351 FALEAANYQD TIGRLQDEIQ NMKEEMARHL REYQDLLNVK MALDIEIATY
401 RKLLEGEESR ISLPLPTFSS LNLRETNLES LPLVDTHSKR TLLIKTVETR
451 DGQVINETSQ HHDDLE
```

Show predicted peptides also

Sort Peptides By

Residue Number  Increasing Mass  Decreasing Mass

| Start | End | Observed  | Mr (expt) | Mr (calc) | ppm | Miss | Sequence                  |
|-------|-----|-----------|-----------|-----------|-----|------|---------------------------|
| 5     | 13  | 1028.5667 | 1027.5594 | 1027.5047 | 53  | 1    | R.SVSSSSYRR.M             |
| 14    | 28  | 1543.7866 | 1542.7793 | 1542.6845 | 61  | 0    | R.MFGGSGTSSRPSSNR.S Oxid  |
| 29    | 36  | 914.5001  | 913.4928  | 913.4505  | 46  | 0    | R.SYVTTSTR.T              |
| 29    | 50  | 2391.3230 | 2390.3157 | 2390.2190 | 40  | 1    | R.SYVTTSTRITYSLGSALRPSTSR |
| 37    | 50  | 1495.8713 | 1494.8640 | 1494.7790 | 57  | 0    | R.TYSLGSALRPSTSR.S        |
| 51    | 64  | 1444.7861 | 1443.7788 | 1443.6994 | 55  | 0    | R.SLYSSSPGGAYVTR.S        |
| 79    | 97  | 2126.1934 | 2125.1861 | 2125.0579 | 60  | 0    | R.LLQDSVDFSLADAINTEFK.N   |
| 79    | 100 | 2498.3972 | 2497.3899 | 2497.2336 | 63  | 1    | R.LLQDSVDFSLADAINTEFKNTR  |
| 101   | 113 | 1587.8877 | 1586.8804 | 1586.7900 | 57  | 1    | R.TNEKVELQELNDR.F         |
| 105   | 113 | 1115.6230 | 1114.6157 | 1114.5618 | 48  | 0    | K.VEQLQELNDR.F            |
| 114   | 122 | 1125.6603 | 1124.6530 | 1124.5978 | 49  | 1    | R.FANYIDKVR.F             |
| 121   | 129 | 1162.6176 | 1161.6103 | 1161.6142 | -3  | 1    | K.VRFLEQQNK.I Deamidate   |



# M9

4700 MS/MS Precursor 1557.99 Spec #1 MC[BP = 86.1, 11204]

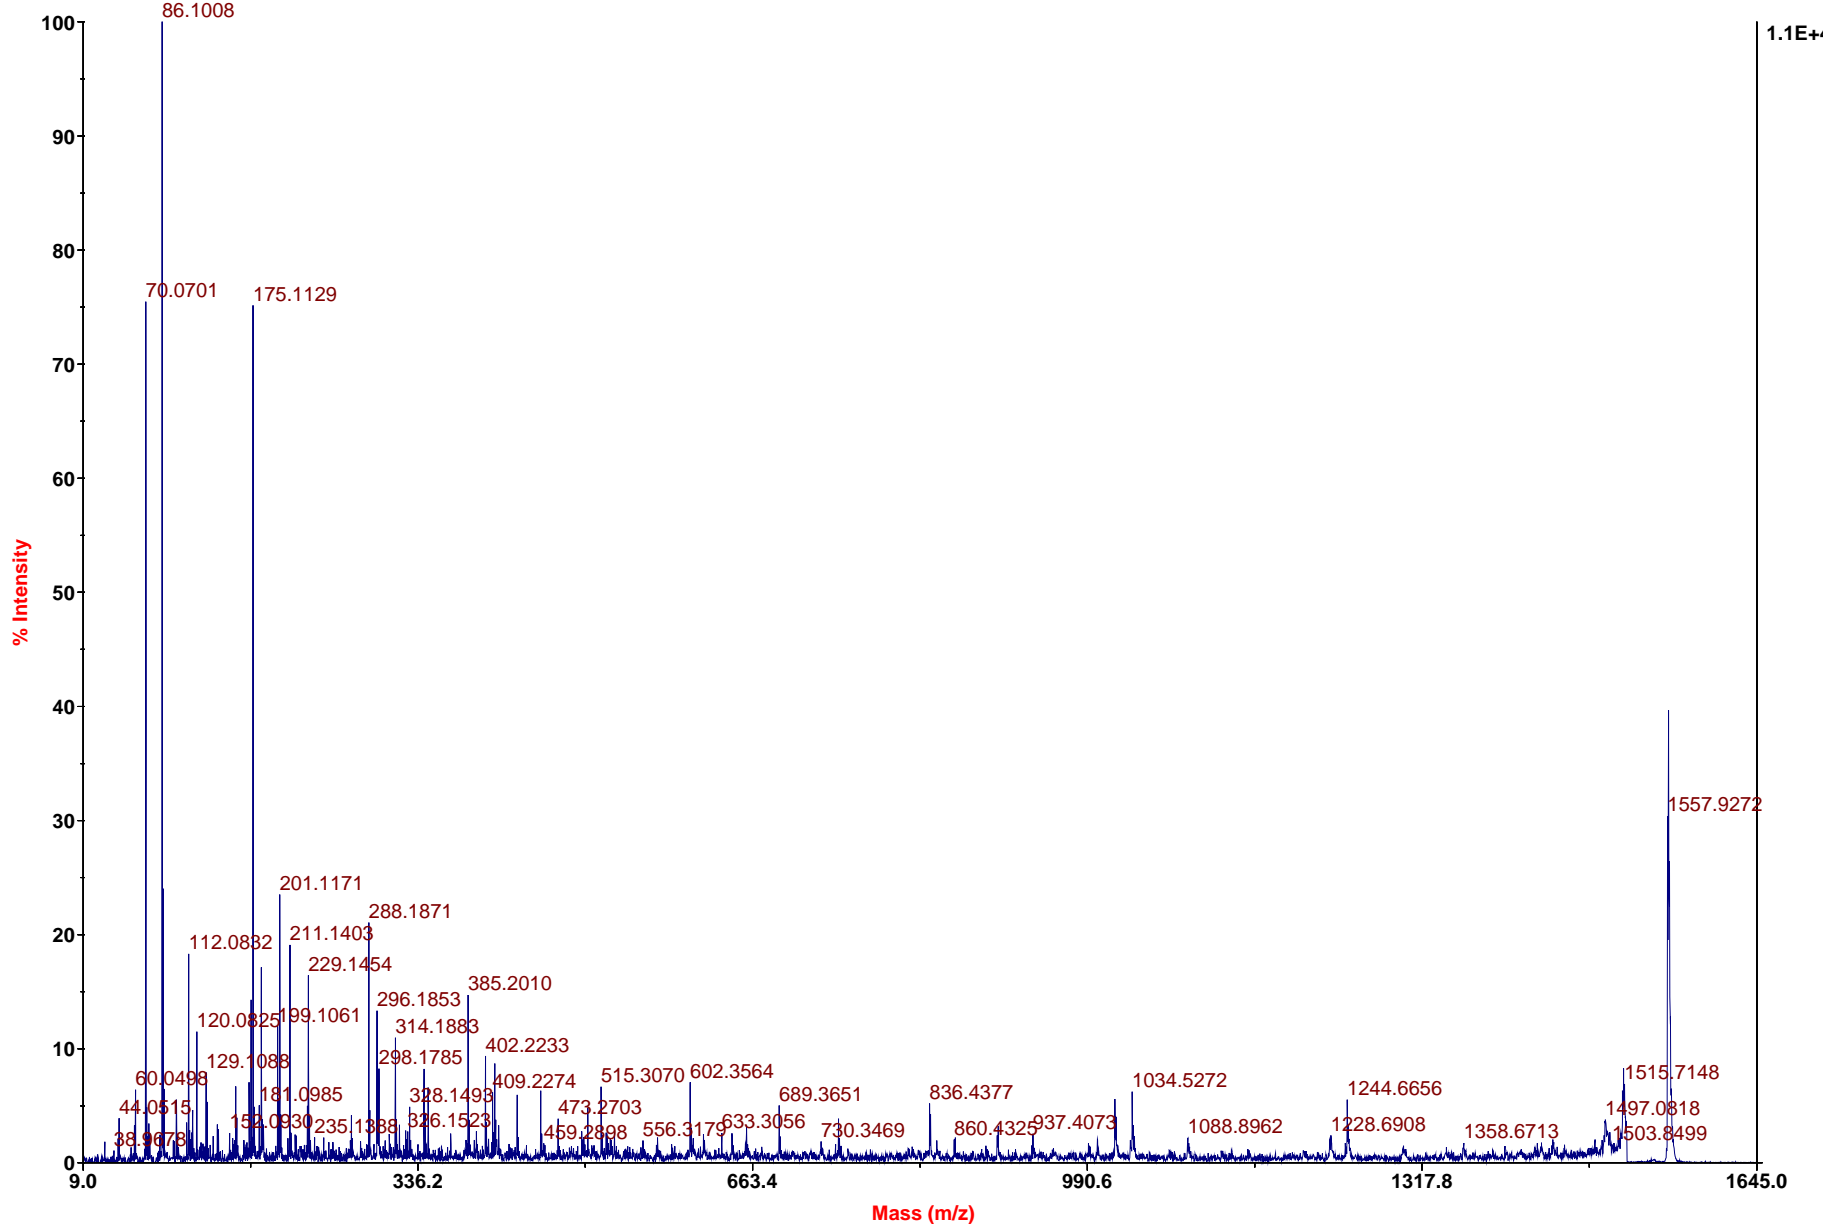

# M9

4700 MS/MS Precursor 1587.89 Spec #1 MC[BP = 175.1, 4668]

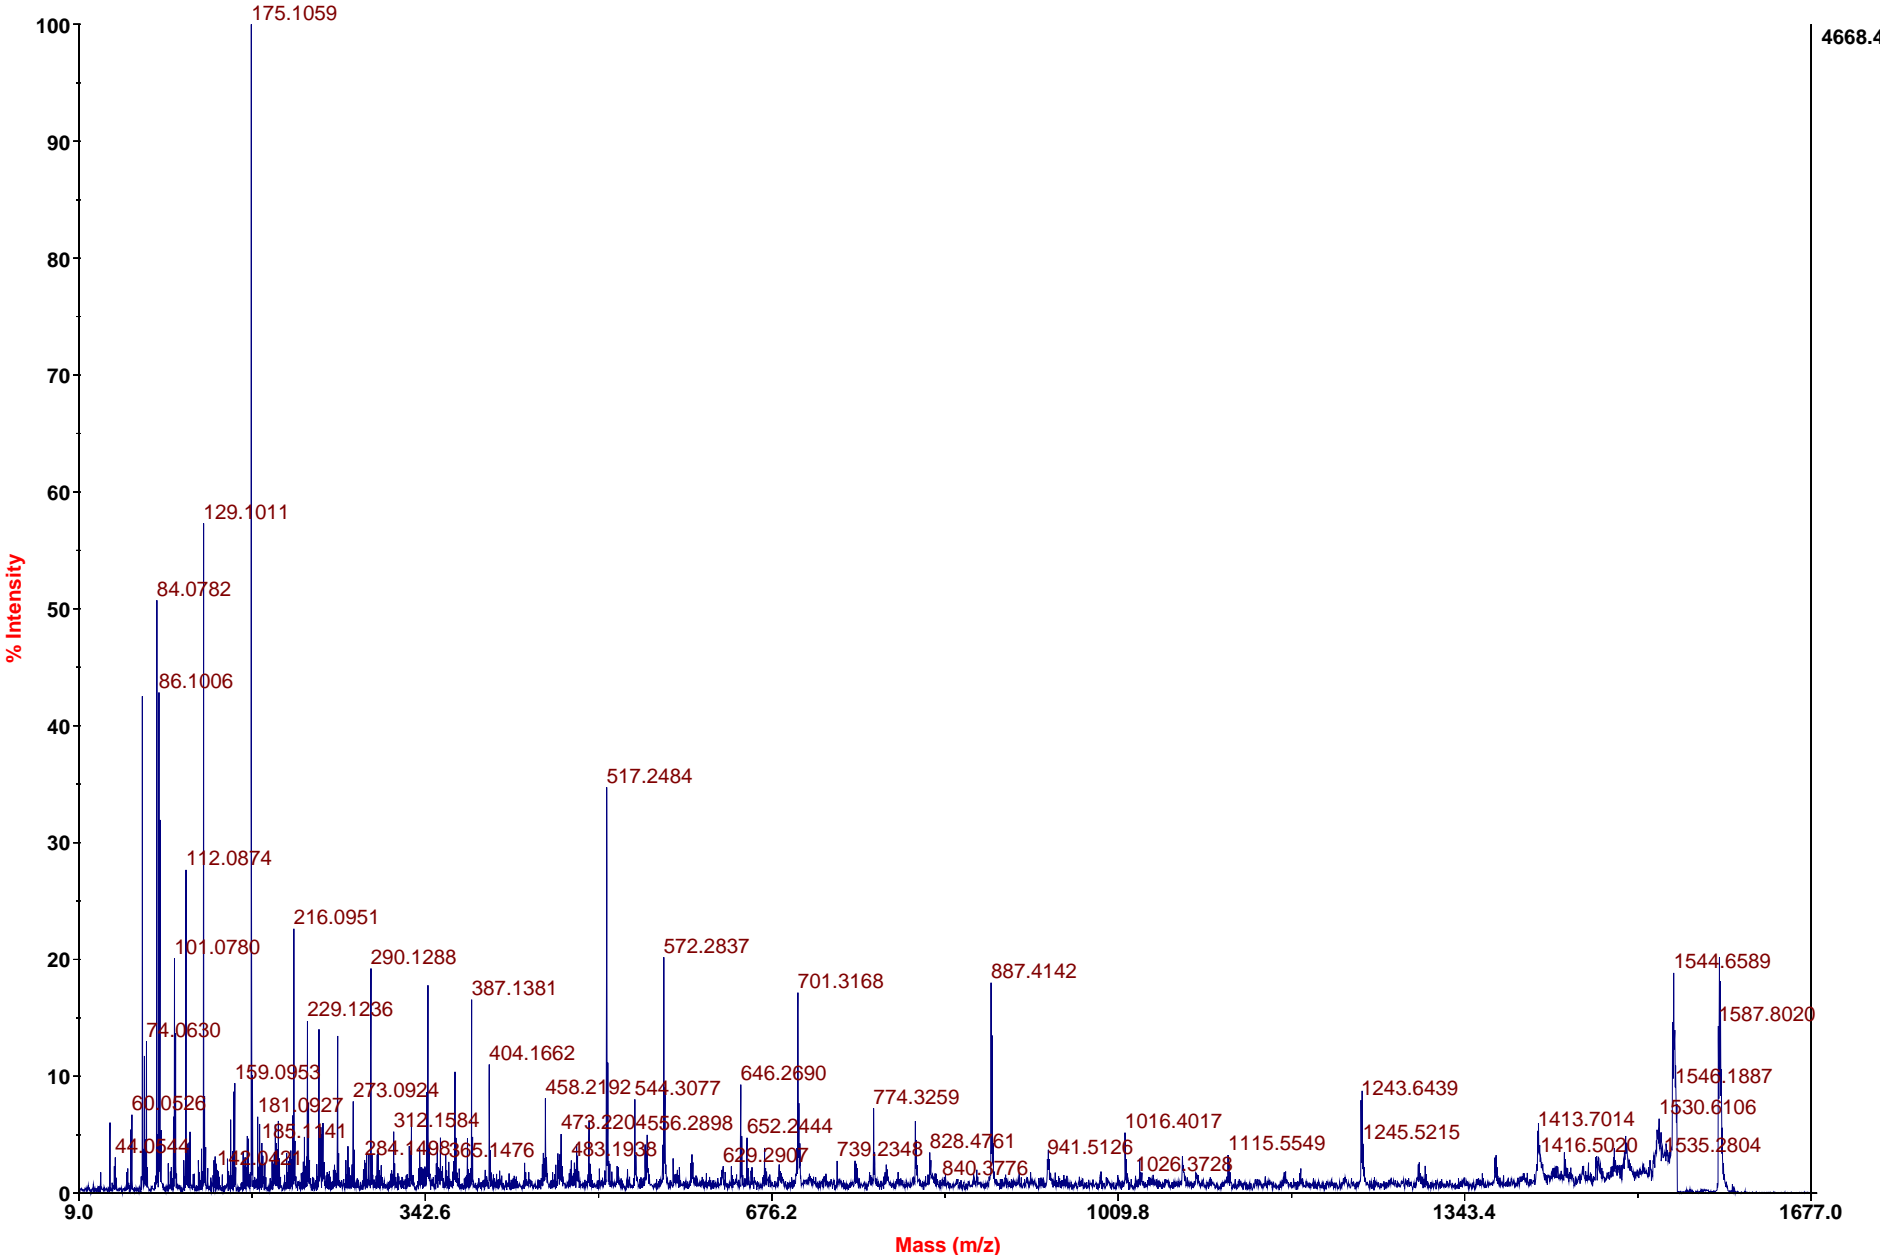

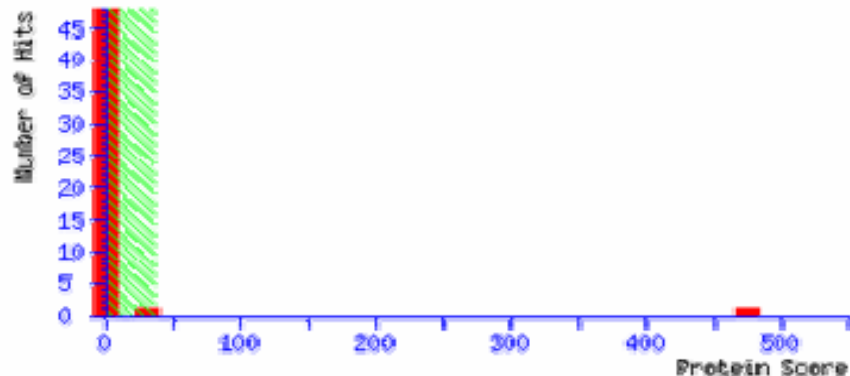

## Peptide Summary Report

Format As

Peptide Summary

[Help](#)

Significance threshold  $p < 0.05$

Max. number of hits

Standard scoring  MudPIT scoring

Ions score or expect cut-off

Show sub-sets

Show pop-ups  Suppress pop-ups

Sort unassigned

Require bold red

Select All

Select None

Search Selected

Error tolerant

1. [VIME MOUSE](#) Mass: 53524 Score: 474 Matches: 18(12) Sequences: 18(12) emPAI: 4.20  
Vimentin.- Mus musculus (Mouse).

Check to include this hit in error tolerant search

| Query                                                  | Observed  | Mr(expt)  | Mr(calc)  | ppm  | Miss | Score | Expect  | Rank | Unique | Peptide            |
|--------------------------------------------------------|-----------|-----------|-----------|------|------|-------|---------|------|--------|--------------------|
| <input checked="" type="checkbox"/> <a href="#">2</a>  | 1046.5822 | 1045.5749 | 1045.5226 | 50.0 | 0    | 24    | 1.2     | 1    | U      | K.LQEEMLQR.E       |
| <input checked="" type="checkbox"/> <a href="#">3</a>  | 1081.5541 | 1080.5468 | 1080.4948 | 48.2 | 1    | 27    | 0.53    | 1    | U      | K.QESNEYRR.Q       |
| <input checked="" type="checkbox"/> <a href="#">4</a>  | 1093.5795 | 1092.5722 | 1092.5200 | 47.8 | 0    | 61    | 0.00028 | 1    | U      | K.FADLSEAANR.N     |
| <input checked="" type="checkbox"/> <a href="#">5</a>  | 1115.6230 | 1114.6157 | 1114.5618 | 48.4 | 0    | 31    | 0.23    | 1    | U      | K.VELQELNDR.F      |
| <input checked="" type="checkbox"/> <a href="#">6</a>  | 1125.6603 | 1124.6530 | 1124.5978 | 49.1 | 1    | 35    | 0.058   | 1    | U      | R.FANYIDKVR.F      |
| <input checked="" type="checkbox"/> <a href="#">7</a>  | 1254.6342 | 1253.6269 | 1253.5598 | 53.6 | 0    | 71    | 2.3e-05 | 1    | U      | R.LGDLYEEEMR.E     |
| <input checked="" type="checkbox"/> <a href="#">8</a>  | 1295.7336 | 1294.7263 | 1294.6591 | 51.9 | 0    | 44    | 0.0081  | 1    | U      | K.MALDIEIATYR.K    |
| <input checked="" type="checkbox"/> <a href="#">9</a>  | 1309.6732 | 1308.6659 | 1308.5986 | 51.5 | 0    | 46    | 0.0081  | 1    | U      | K.NLQEAEEWYK.S     |
| <input checked="" type="checkbox"/> <a href="#">10</a> | 1444.7861 | 1443.7788 | 1443.6994 | 55.0 | 0    | 60    | 0.0003  | 1    | U      | R.SLYSSSPGGAYVTR.S |

## Protein View

Match to: **VIME\_MOUSE** Score: 474  
Vimentin.- Mus musculus (Mouse).  
Found in search of ppw\_I2\_129990855108.txt

Nominal mass ( $M_r$ ): 53524; Calculated pI value: 5.06  
NCBI BLAST search of [VIME\\_MOUSE](#) against nr  
Unformatted [sequence string](#) for pasting into other applications

Taxonomy: [Mus musculus](#)

Variable modifications: Carbamidomethyl (C), Deamidated (NQ), Oxidation (M)  
Cleavage by Trypsin: cuts C-term side of KR unless next residue is P  
Sequence Coverage: 47%

Matched peptides shown in **Bold Red**

```
1 STRSVSSSSY RRMFGGSGTS SRPSSNRSYV TTSTRTYSLG SALRPSTSR
51 LYSSSPGGAY VTRSSAVRLR SSVPGVRLLQ DSVDFSLADA INTEFKNTRT
101 NEKVELQELN DRFFANYIDKV RFLEQQNKIL LAELEQLKGQ GKSRLGDLYE
151 EEMRELRRQV DQLTNDKARV EVERDNLAED IMRLREKLQE EMLQREEAES
201 TLQSFRQDVD NASLARLDLE RKVESLQEEI AFLKKLHDEE IQELQAQIQE
251 QHVQIDVDVS KPDLTAALRD VRQQYESVAA KNLQEAEWY KSKFADLSEA
301 ANRNDALRQ AKQESNEYRR QVQSLTCEVD ALKGTNESLE RQMREENF
351 ALEAANYQDT IGRLQDEIQN MKEEMARHLR EYQDLLNVKM ALDIEIATYR
401 KLLEGEESRI SLPLPTFSSL NLRETNLESL PLVDTHSKRT LLIKTIVETRD
451 GQVINETSQH HDDLE
```

Show predicted peptides also

Sort Peptides By

Residue Number  Increasing Mass  Decreasing Mass

| Start | End | Observed  | Mr(expt)  | Mr(calc)  | ppm | Miss | Sequence                                                          |
|-------|-----|-----------|-----------|-----------|-----|------|-------------------------------------------------------------------|
| 36    | 49  | 1495.8713 | 1494.8640 | 1494.7790 | 57  | 0    | <b>R.TYSLG</b> SALRPSTSR.S ( <a href="#">Ions score 8</a> )       |
| 50    | 63  | 1444.7861 | 1443.7788 | 1443.6994 | 55  | 0    | <b>R.SLYSSSPGGAY</b> VTR.S ( <a href="#">Ions score 60</a> )      |
| 78    | 96  | 2126.1934 | 2125.1861 | 2125.0579 | 60  | 0    | <b>R.LLQDSVDFSLADA</b> INTEFK.N ( <a href="#">Ions score 75</a> ) |
| 100   | 112 | 1587.8877 | 1586.8804 | 1586.7900 | 57  | 1    | <b>R.TNEKVELQELNDR</b> .F ( <a href="#">Ions score 71</a> )       |
| 104   | 112 | 1115.6230 | 1114.6157 | 1114.5618 | 48  | 0    | <b>K.VELQELNDR</b> .F ( <a href="#">Ions score 31</a> )           |
| 113   | 121 | 1125.6603 | 1124.6530 | 1124.5978 | 49  | 1    | <b>R.FANYIDKVR</b> .F ( <a href="#">Ions score 35</a> )           |
| 145   | 154 | 1254.6342 | 1253.6269 | 1253.5598 | 54  | 0    | <b>R.LGDLYEEEMR</b> .E ( <a href="#">Ions score 71</a> )          |
| 170   | 183 | 1688.9269 | 1687.9196 | 1687.8199 | 59  | 1    | <b>R.VEVERDNLAEDIMR</b> .L ( <a href="#">Ions score 30</a> )      |
| 188   | 195 | 1046.5822 | 1045.5749 | 1045.5226 | 50  | 0    | <b>K.LQEEMLQR</b> .E ( <a href="#">Ions score 24</a> )            |
| 188   | 206 | 2324.2590 | 2323.2517 | 2323.1114 | 60  | 1    | <b>K.LQEEMLQREEAESTLQSF</b> R.Q ( <a href="#">Ions score 42</a> ) |
| 282   | 291 | 1309.6732 | 1308.6659 | 1308.5986 | 51  | 0    | <b>K.NLOEAEEWYK</b> S ( <a href="#">Ions score 46</a> )           |

# Sample M10

4700 Reflector Spec #1 MC=>NR(2.00)[BP = 1558.0, 29698]

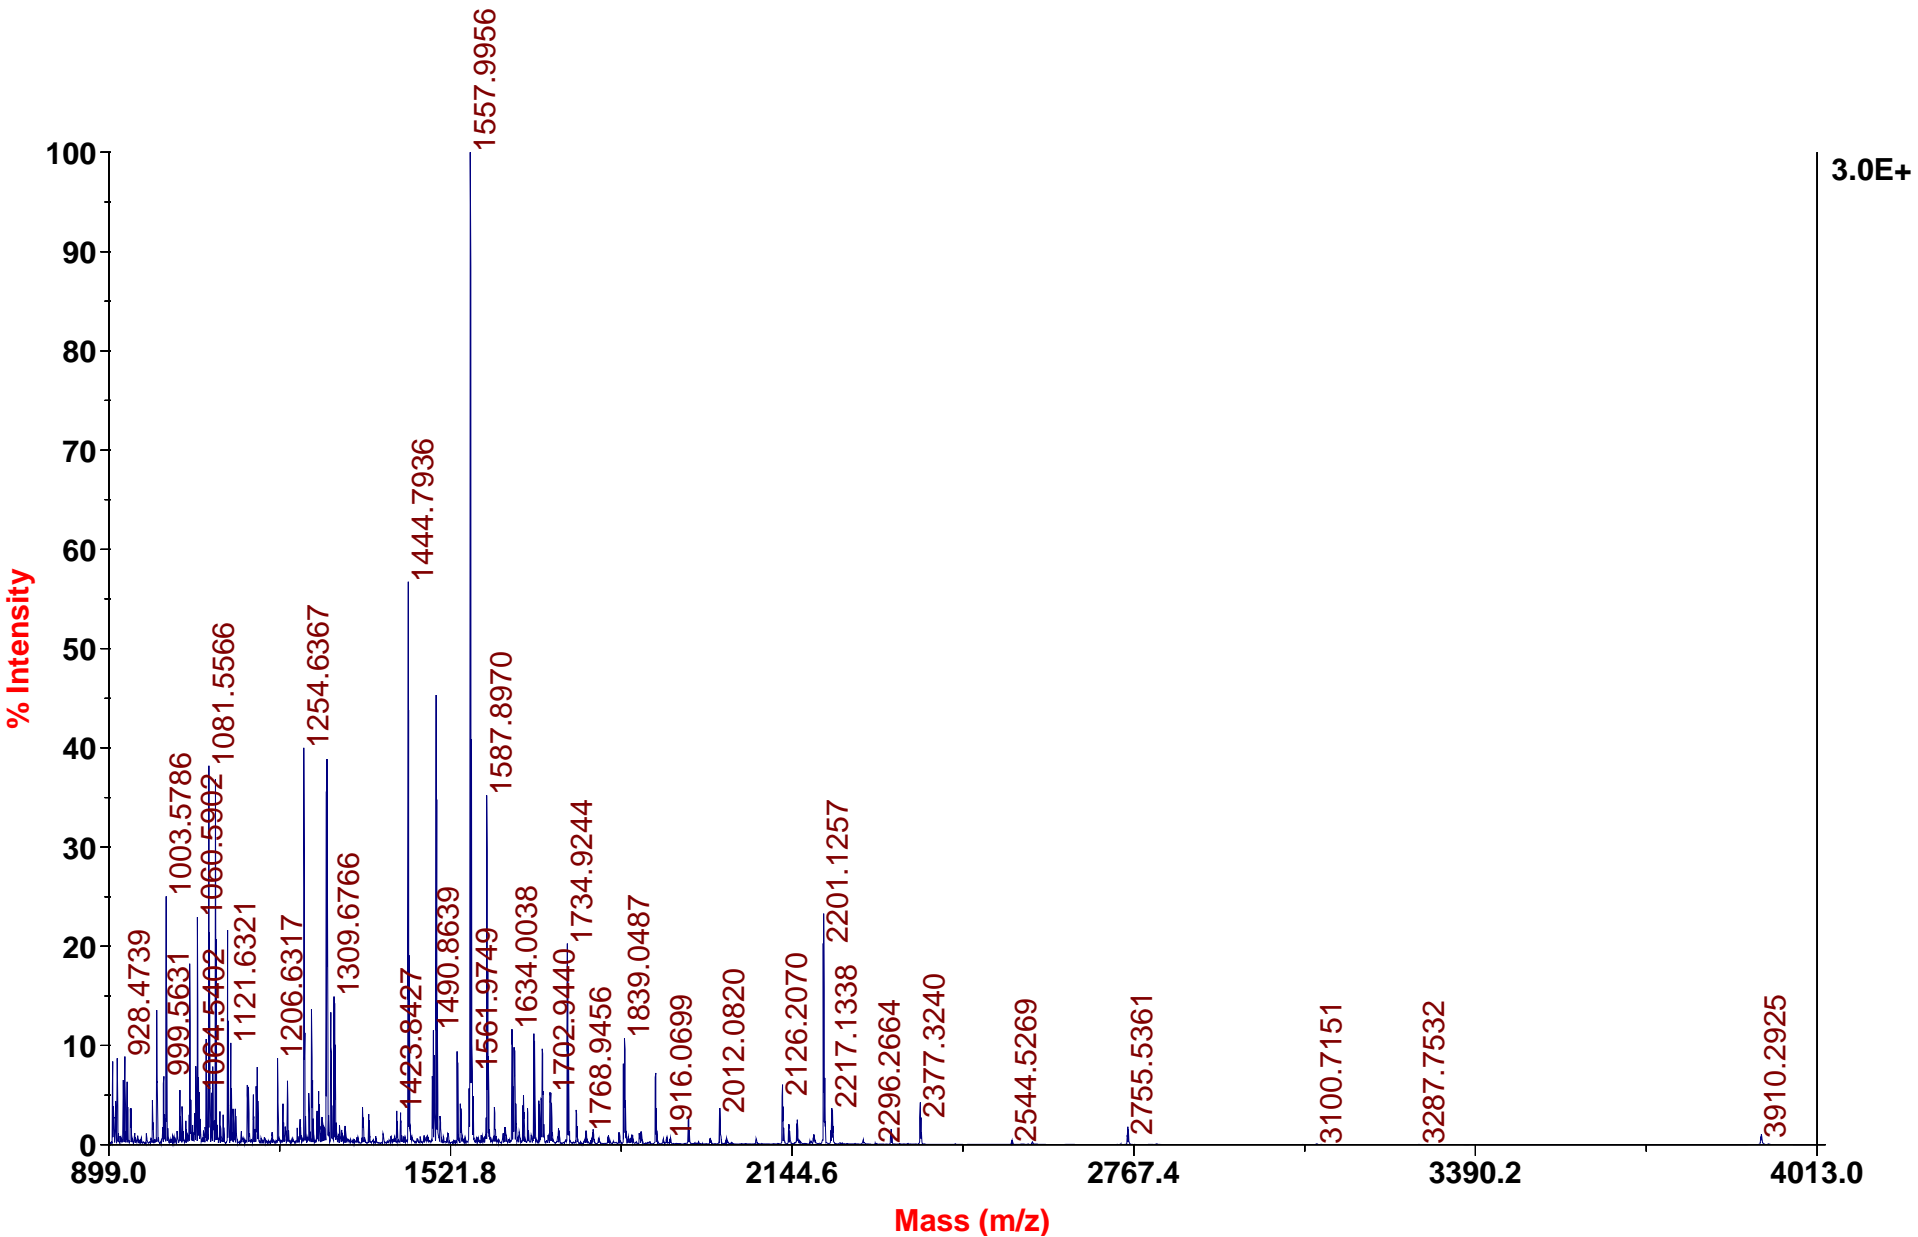

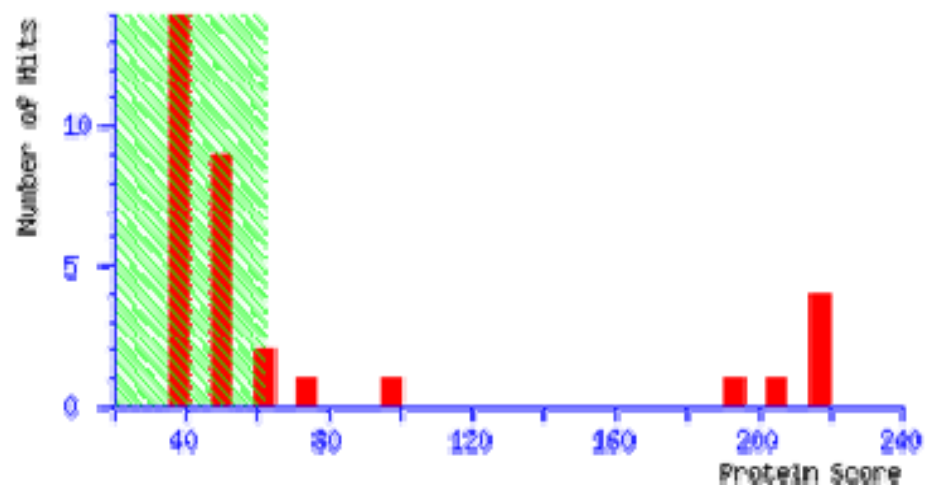

## Concise Protein Summary Report

Format As

Concise Protein Summary

[Help](#)

Significance threshold  $p <$

Max. number of hits

Re-Search All

Search Unmatched

- [CAA39807](#)    **Mass:** 53689    **Score:** 217    **Expect:** 1.8e-17    **Matches:** 64  
 MMVMTM NID: - Mus musculus

---

- [VIME\\_MOUSE](#)    **Mass:** 53524    **Score:** 216    **Expect:** 2.3e-17    **Matches:** 65  
 Vimentin.- Mus musculus (Mouse).

[Q5FWJ3\\_MOUSE](#)    **Mass:** 53655    **Score:** 216    **Expect:** 2.3e-17    **Matches:** 65  
 Vimentin (NOD-derived CD11c +ve dendritic cells cDNA, RIKEN full-length enriched library, (

[CAA69019](#)    **Mass:** 51533    **Score:** 210    **Expect:** 9.2e-17    **Matches:** 64  
 MMVIMENT NID: - Mus musculus

## Protein View

Match to: [CAA39807](#) Score: 217 Expect: 1.8e-17

MMVMTM NID: - Mus musculus

Found in search of pmf\_J2\_129990849009.txt

Nominal mass ( $M_r$ ): 53689; Calculated pI value: 5.06

NCBI BLAST search of [CAA39807](#) against nr

Unformatted [sequence string](#) for pasting into other applications

Taxonomy: [Mus musculus](#)

Variable modifications: Carbamidomethyl (C), Deamidated (NQ), Oxidation (M)

Cleavage by Trypsin: cuts C-term side of KR unless next residue is P

Number of mass values searched: 178

Number of mass values matched: 64

Sequence Coverage: 83%

Matched peptides shown in **Bold Red**

```
1  MSTRSVSSSS YRRMFGGSGT SSRPSSNRSY VTTSTRTYSL GSALRPSTSR
51  SLYSSSPGGA YVTRSSAVRL RSSVPGVRL QDSVDFSLAD AINTEFKNTR
101 TNEKVELQEL NDRFANYIDK VRFLEQQNKI LLAELEQLKG QGKSRLGDLY
151 EEEMRELRQ VDQFTNDKAR VEVERDNLAE DIMRLREKLQ EEMLQREEAE
201 STLQSFQDV DNASLARLDL ERKVESLQEE IAFLKKLHDE EIQLQAQIQ
251 EQHVQIDVDV SKPDLTAAALR DVRQQYESVA AKNLQEAEBW YKSKFADLSE
301 AANRNDALR QAKQESNEYR RQVQSLTCEV DALKGTNESL ERQMRMEEN
351 FALEAANYQD TIGRLQDEIQ NMKEEMARHL REYQDLLNVK MALDIEIATY
401 RKLLEGEESR ISLPLPTFSS LNLRETNLES LPLVDTHSKR TLLIKTVETR
451 DGQVINETSQ HHDDLE
```

Show predicted peptides also

Sort Peptides By

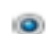

Residue Number

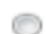

Increasing Mass

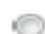

Decreasing Mass

| Start | End | Observed  | Mr(expt)  | Mr(calc)  | ppm | Miss | Sequence                    |
|-------|-----|-----------|-----------|-----------|-----|------|-----------------------------|
| 2     | 12  | 1216.6931 | 1215.6858 | 1215.5844 | 83  | 1    | M. STRSVSSSSYR.R            |
| 5     | 13  | 1028.5896 | 1027.5823 | 1027.5047 | 76  | 1    | R. SVSSSSYRR.M              |
| 29    | 36  | 914.4987  | 913.4914  | 913.4505  | 45  | 0    | R. SYVTTSTR.T               |
| 29    | 50  | 2391.3303 | 2390.3230 | 2390.2190 | 44  | 1    | R. SYVTTSTRTYSLGSALRPSTSR.S |
| 37    | 50  | 1495.8760 | 1494.8687 | 1494.7790 | 60  | 0    | R. TYSLGSALRPSTSR.S         |
| 51    | 64  | 1444.7904 | 1443.7831 | 1443.6994 | 58  | 0    | R. SLYSSSPGGAYVTR.S         |
| 79    | 97  | 2126.2061 | 2125.1988 | 2125.0579 | 66  | 0    | R. LLQDSVDFSLADAINTEFK.N    |
| 101   | 113 | 1587.8940 | 1586.8867 | 1586.7900 | 61  | 1    | R. TNEKVELQELNDR.F          |
| 105   | 113 | 1115.6248 | 1114.6175 | 1114.5618 | 50  | 0    | K. VELQELNDR.F              |

# M10

4700 MS/MS Precursor 1557.99 Spec #1 MC[BP = 86.1, 6500]

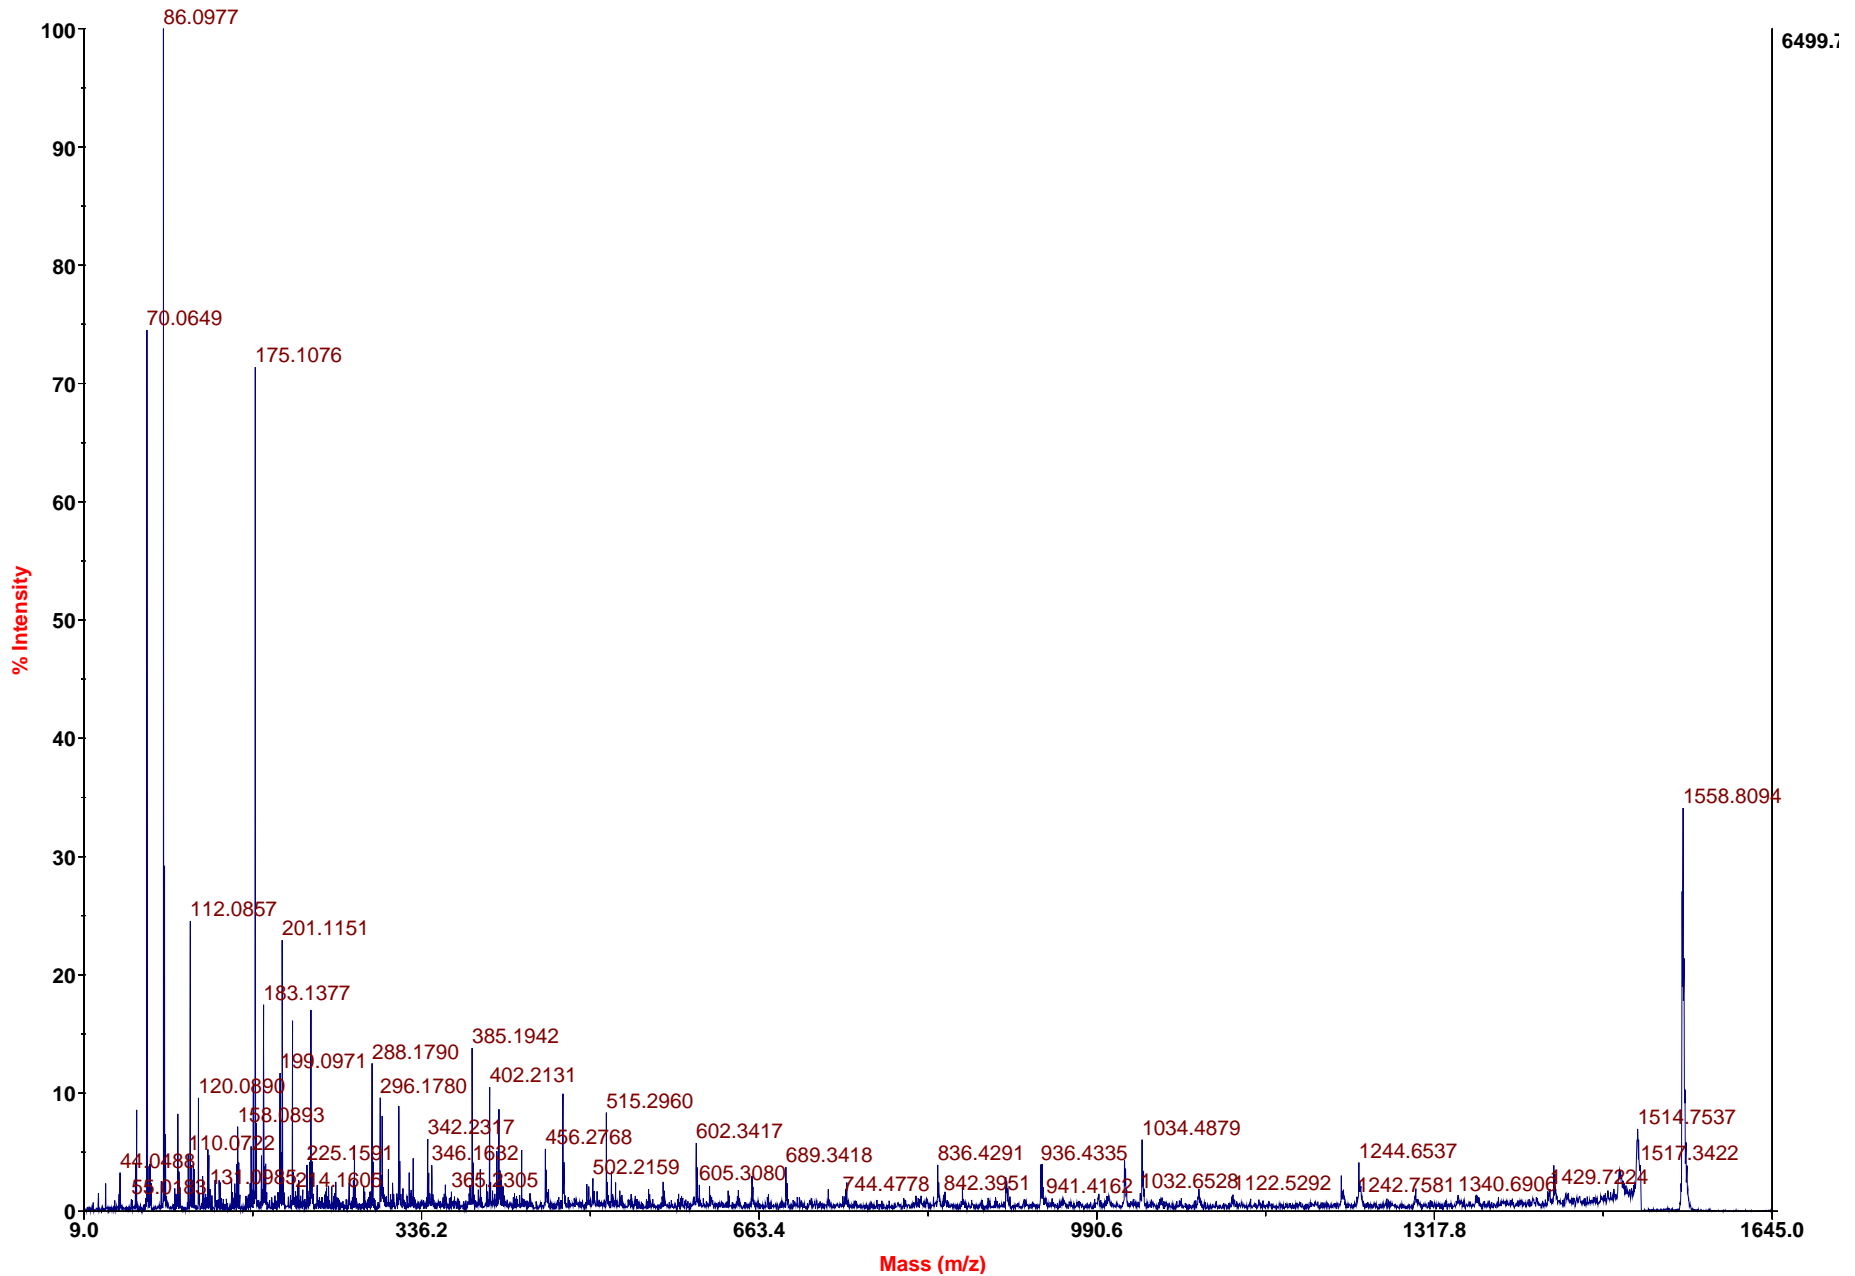



# M10

4700 MS/MS Precursor 1295.74 Spec #1 MC[BP = 175.1, 7417]

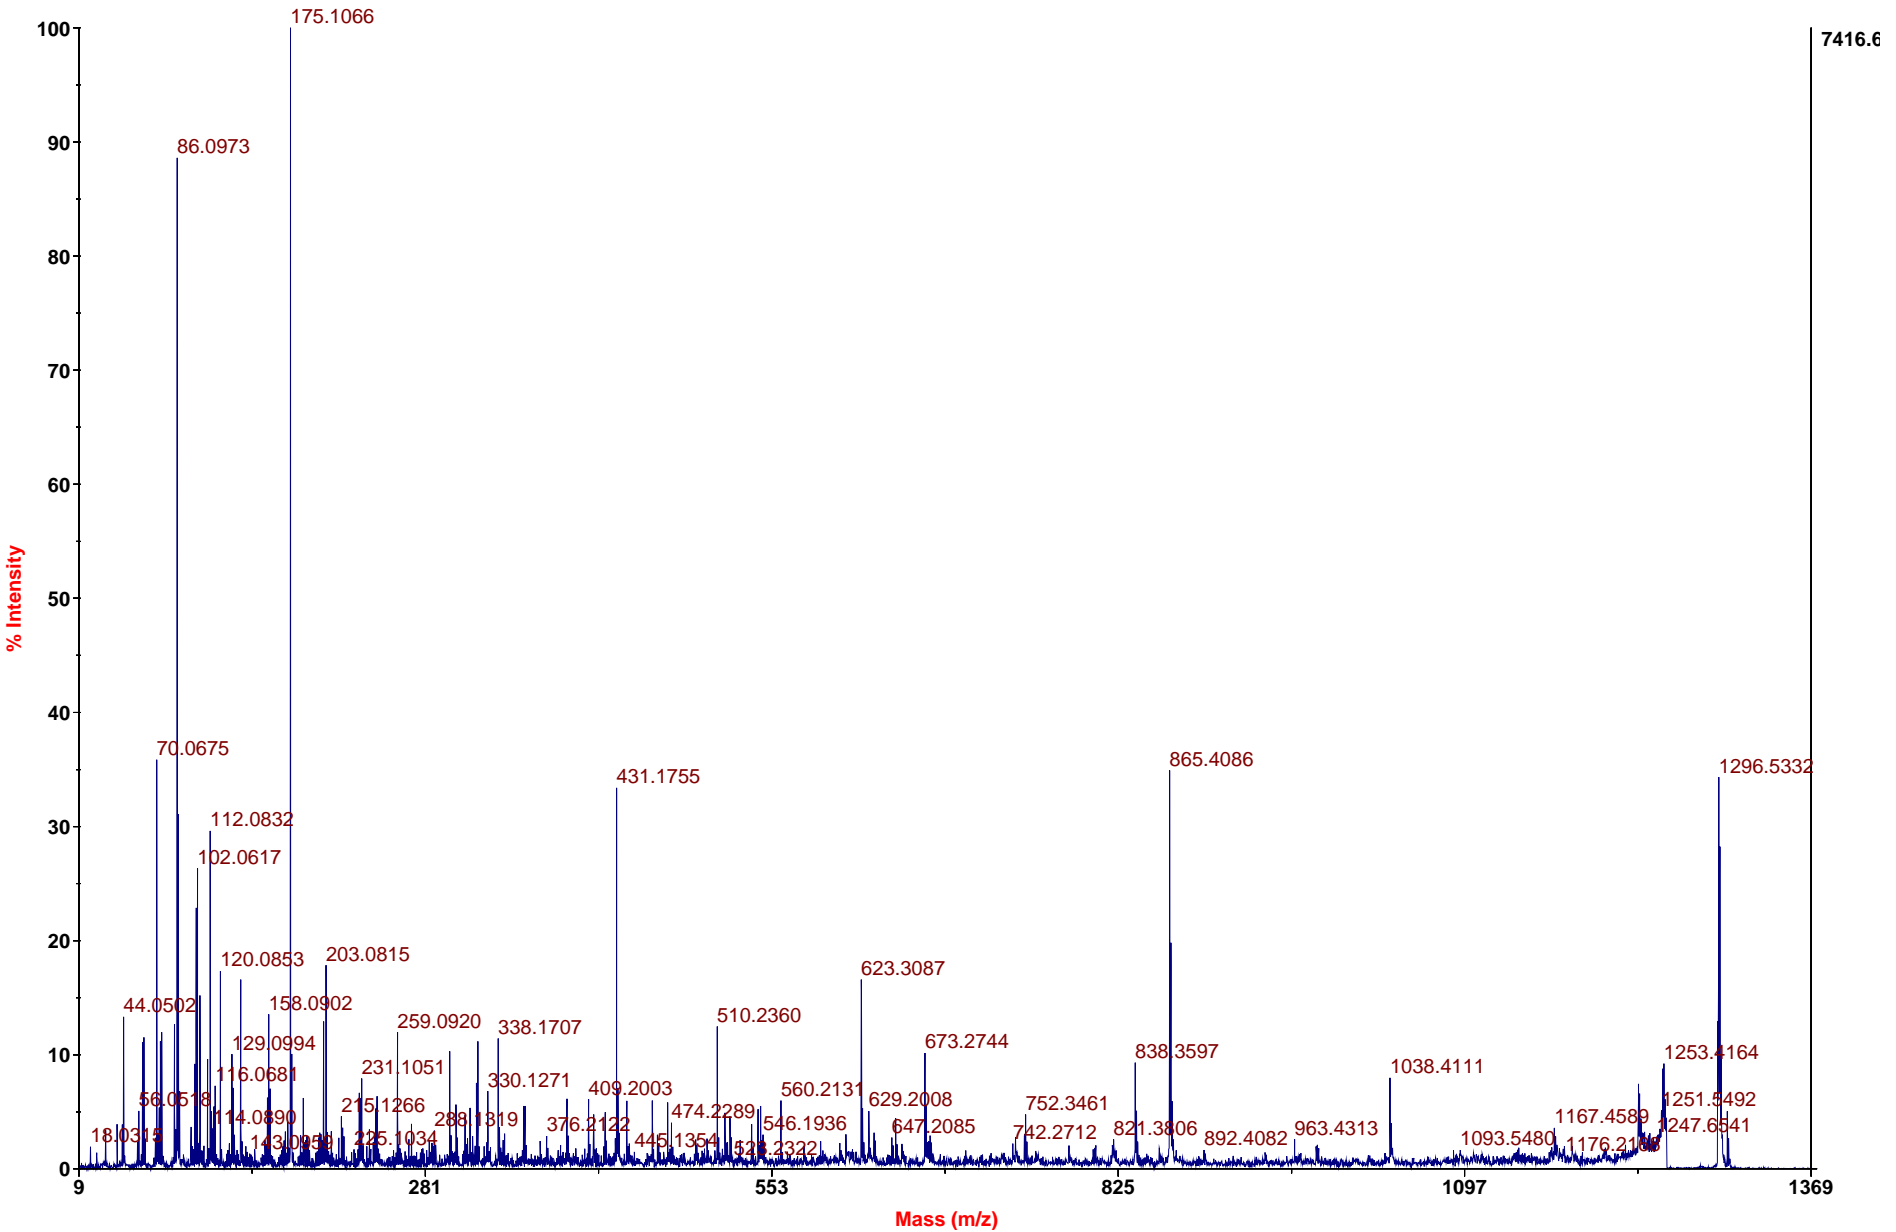

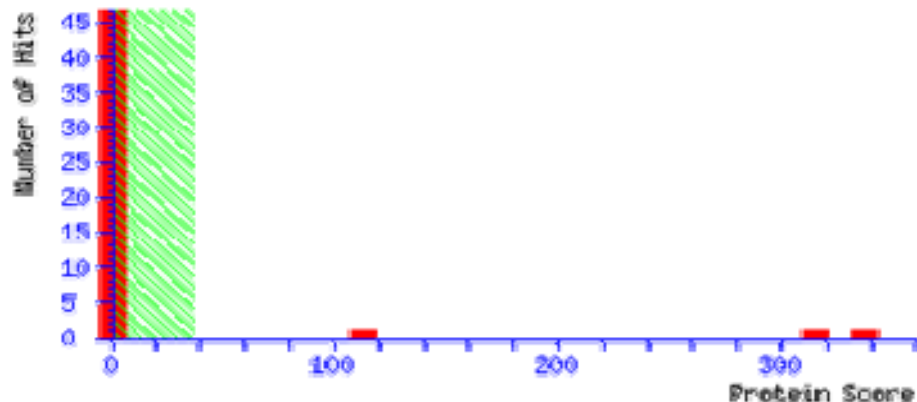

## Peptide Summary Report

Format As

Peptide Summary

[Help](#)

Significance threshold  $p <$

Max. number of hits

Standard scoring

MudPIT scoring

Ions score or expect cut-off

Show sub-sets

Show pop-ups

Suppress pop-ups

Sort unassigned

Require bold red

Select All

Select None

Search Selected

Error tolerant

1. [VIME\\_MOUSE](#) Mass: 53524 Score: 337 Matches: 15(9) Sequences: 15(9) emPAI: 1.53

Vimentin.- Mus musculus (Mouse).

Check to include this hit in error tolerant search

| Query                                                  | Observed  | Mr(expt)  | Mr(calc)  | ppm  | Miss | Score | Expect  | Rank | Unique | Peptide         |
|--------------------------------------------------------|-----------|-----------|-----------|------|------|-------|---------|------|--------|-----------------|
| <input checked="" type="checkbox"/> <a href="#">3</a>  | 1046.5817 | 1045.5744 | 1045.5226 | 49.6 | 0    | 27    | 0.61    | 1    |        | K.LQEEMLQR.E    |
| <input checked="" type="checkbox"/> <a href="#">4</a>  | 1081.5563 | 1080.5490 | 1080.4948 | 50.2 | 1    | 16    | 6.2     | 1    |        | K.QESNEYRR.Q    |
| <input checked="" type="checkbox"/> <a href="#">5</a>  | 1093.5818 | 1092.5745 | 1092.5200 | 49.9 | 0    | 58    | 0.00047 | 1    |        | K.FADLSEAANR.N  |
| <input checked="" type="checkbox"/> <a href="#">6</a>  | 1115.6248 | 1114.6175 | 1114.5618 | 50.0 | 0    | 32    | 0.18    | 1    |        | K.VELQELNDR.F   |
| <input checked="" type="checkbox"/> <a href="#">7</a>  | 1254.6362 | 1253.6289 | 1253.5598 | 55.2 | 0    | 72    | 1.7e-05 | 1    |        | R.LGDLYEEEMR.E  |
| <input checked="" type="checkbox"/> <a href="#">9</a>  | 1295.7373 | 1294.7300 | 1294.6591 | 54.8 | 0    | 36    | 0.055   | 1    |        | K.MALDIEIATYR.K |
| <input checked="" type="checkbox"/> <a href="#">10</a> | 1309.6765 | 1308.6692 | 1308.5986 | 54.0 | 0    | 39    | 0.034   | 1    |        | K.NLQEAEEWYK.S  |

## Protein View

Match to: **VIME\_MOUSE** Score: 337  
Vimentin.- Mus musculus (Mouse).  
Found in search of ppw\_J2\_129990855309.txt

Nominal mass ( $M_r$ ): 53524; Calculated pI value: 5.06  
NCBI BLAST search of [VIME\\_MOUSE](#) against nr  
Unformatted [sequence string](#) for pasting into other applications

Taxonomy: [Mus musculus](#)

Variable modifications: Carbamidomethyl (C), Deamidated (NQ), Oxidation (M)  
Cleavage by Trypsin: cuts C-term side of KR unless next residue is P  
Sequence Coverage: 36%

Matched peptides shown in **Bold Red**

```
1 STRSVSSSSY RRMFGGSGTS SRPSSNRSYV TTSTRTYSLG SALRPSTSR
51 LYSSSPGGAY VTRSSAVRLR SSVPGVRLQ DSVDFSLADA INTEFKNRT
101 NEKVELQELN DRFANYIDKV RFLEQQNKIL LAELEQLKGQ GKSRLGDLYE
151 EEMRELRRQV DQLTNDKARV EVERDNLAED IMRLREKLQE EMLQREEAES
201 TLQSFRQDVD NASLARLDLE RKVESLQEEI AFLKKLHDEE IQELQAQIQE
251 QHVQIDVDVS KPDLTAALRD VRQYESVAA KNLQEAEWY KSKFADLSEA
301 ANRRNDALRQ AKQESNEYRR QVQSLTCEVD ALKGTNESLE RQMREMEENF
351 ALEAANYQDT IGRLQDEIQN MKEEMARHLR EYQDLLNVKM ALDIEIATYR
401 KLLEGEESRI SLPLPTFSSL NLRETNLESL PLVDTHSKRT LLIKTVETRD
451 GQVINETSQH HDDLE
```

Show predicted peptides also

Sort Peptides By

Residue Number  Increasing Mass  Decreasing Mass

| Start - End | Observed  | Mr(expt)  | Mr(calc)  | ppm | Miss | Sequence                                                            |
|-------------|-----------|-----------|-----------|-----|------|---------------------------------------------------------------------|
| 36 - 49     | 1495.8760 | 1494.8687 | 1494.7790 | 60  | 0    | R. <b>TYSLGSALRPSTSR</b> .S ( <a href="#">Ions score 7</a> )        |
| 50 - 63     | 1444.7904 | 1443.7831 | 1443.6994 | 58  | 0    | R. <b>SLYSSSPGGAYVTR</b> .S ( <a href="#">Ions score 39</a> )       |
| 100 - 112   | 1587.8940 | 1586.8867 | 1586.7900 | 61  | 1    | R. <b>TNEKVELQELNDR</b> .F ( <a href="#">Ions score 66</a> )        |
| 104 - 112   | 1115.6248 | 1114.6175 | 1114.5618 | 50  | 0    | K. <b>VELQELNDR</b> .F ( <a href="#">Ions score 32</a> )            |
| 145 - 154   | 1254.6362 | 1253.6289 | 1253.5598 | 55  | 0    | R. <b>LGDLYEEEMR</b> .E ( <a href="#">Ions score 72</a> )           |
| 170 - 183   | 1688.9337 | 1687.9264 | 1687.8199 | 63  | 1    | R. <b>VEVERDNLAEDIMR</b> .L ( <a href="#">Ions score 14</a> )       |
| 188 - 195   | 1046.5817 | 1045.5744 | 1045.5226 | 50  | 0    | K. <b>LQEEMLQR</b> .E ( <a href="#">Ions score 27</a> )             |
| 222 - 234   | 1533.9412 | 1532.9339 | 1532.8450 | 58  | 1    | R. <b>KVESLQEEIAFLK</b> .K ( <a href="#">Ions score 44</a> )        |
| 282 - 291   | 1309.6765 | 1308.6692 | 1308.5986 | 54  | 0    | K. <b>NLQEAEEWYK</b> .S ( <a href="#">Ions score 39</a> )           |
| 294 - 303   | 1093.5818 | 1092.5745 | 1092.5200 | 50  | 0    | K. <b>FADLSEAANR</b> .N ( <a href="#">Ions score 58</a> )           |
| 313 - 320   | 1081.5563 | 1080.5490 | 1080.4948 | 50  | 1    | K. <b>QESNEYRR</b> .Q ( <a href="#">Ions score 16</a> )             |
| 345 - 363   | 2201.1218 | 2200.1145 | 2199.9742 | 64  | 0    | R. <b>EMEENFALEAANYQDTIGR</b> .L ( <a href="#">Ions score 122</a> ) |
| 364 - 377   | 1734.9233 | 1733.9160 | 1733.8076 | 63  | 1    | R. <b>LQDEIQNMKEEMAR</b> .H ( <a href="#">Ions score 95</a> )       |
| 390 - 400   | 1295.7373 | 1294.7300 | 1294.6591 | 55  | 0    | K. <b>MALDIEIATYR</b> .K ( <a href="#">Ions score 36</a> )          |
| 410 - 423   | 1557.9924 | 1556.9851 | 1556.8926 | 59  | 0    | R. <b>ISLPLPTFSSLNLR</b> .E ( <a href="#">Ions score 51</a> )       |

# Sample M11

4700 Reflector Spec #1 MC=>NR(2.00)[BP = 1516.8, 43842]

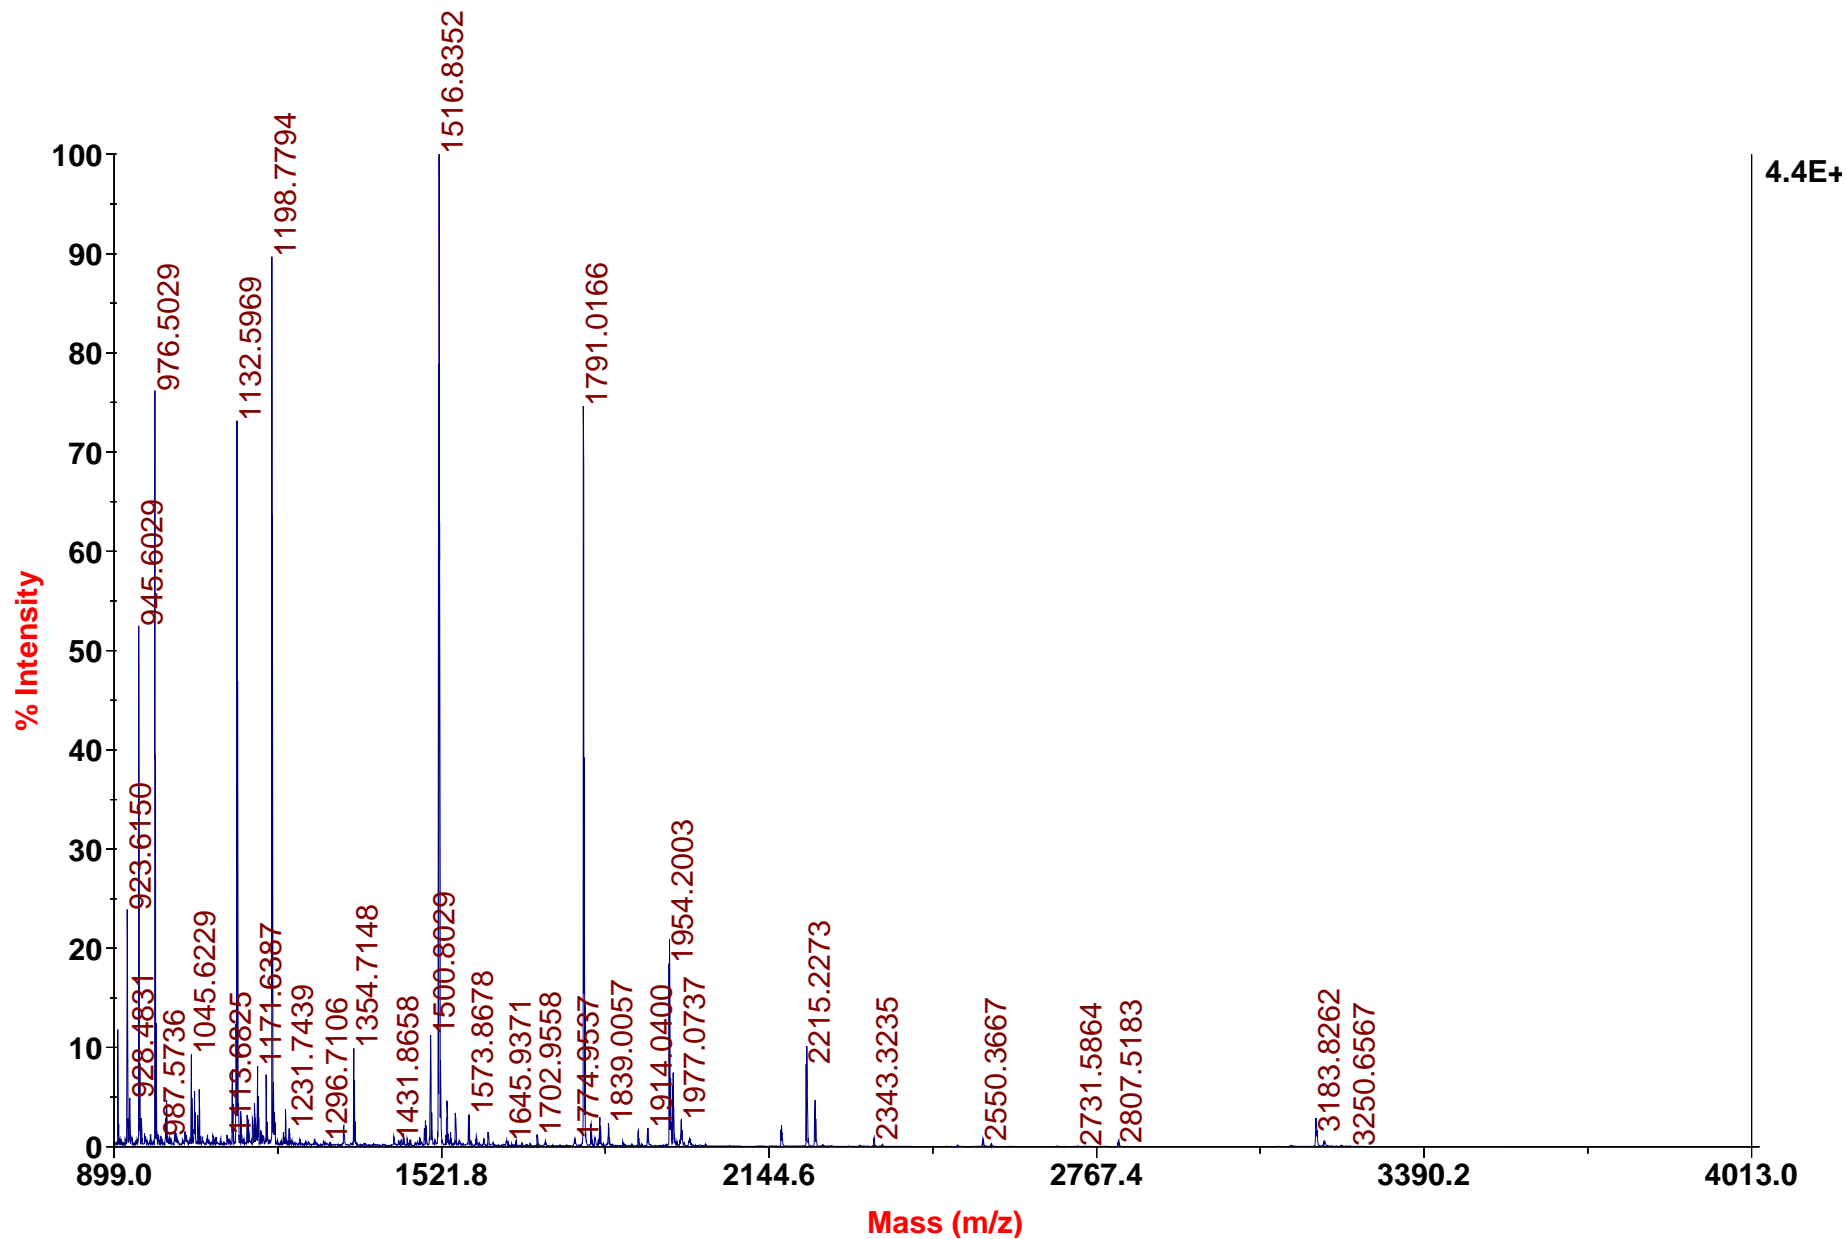

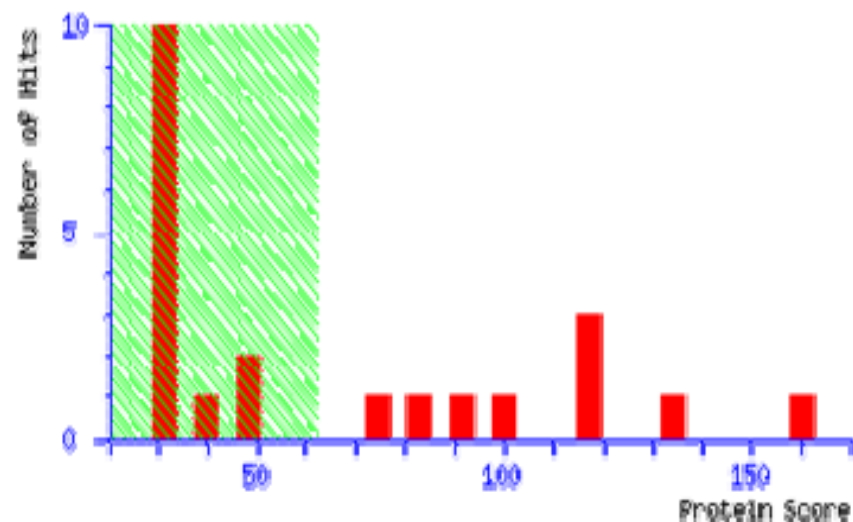

## Concise Protein Summary Report

Format As

Concise Protein Summary

[Help](#)

Significance threshold  $p <$

Max. number of hits

- [Q3TVP6 MOUSE](#)    **Mass:** 41724    **Score:** 160    **Expect:** 9.2e-12    **Matches:** 37  
 Osteoclast-like cell cDNA, RIKEN full-length enriched library, clone:I420044I15 product:actin, beta, c

[Q3UBP6 MOUSE](#)    **Mass:** 41742    **Score:** 136    **Expect:** 2.3e-09    **Matches:** 33  
 Bone marrow macrophage cDNA, RIKEN full-length enriched library, clone:I830016H03 product:actin, beta,

[ATCHB](#)    **Mass:** 41710    **Score:** 136    **Expect:** 2.3e-09    **Matches:** 35  
 actin beta - chicken

[ATHUG](#)    **Mass:** 41766    **Score:** 136    **Expect:** 2.3e-09    **Matches:** 35  
 actin gamma 1 - human

## Protein View

Match to: Q3TVP6\_MOUSE score: 160 Expect: 9.2e-12

Osteoclast-like cell cDNA, RIKEN full-length enriched library, clone:I420044I15 product:actin

Found in search of pmf\_K2\_129990849010.txt

Nominal mass ( $M_r$ ): 41724; Calculated pI value: 5.30

NCBI BLAST search of [Q3TVP6\\_MOUSE](#) against nr

Unformatted [sequence string](#) for pasting into other applications

Taxonomy: [Mus musculus](#)

Links to retrieve other entries containing this sequence from NCBI Entrez:  
(no taxonomy information for this entry)

Variable modifications: Carbamidomethyl (C), Deamidated (NQ), Oxidation (M)

Cleavage by Trypsin: cuts C-term side of KR unless next residue is P

Number of mass values searched: 125

Number of mass values matched: 37

Sequence Coverage: 82%

Matched peptides shown in **Bold Red**

```
1 MDDDIAALVV DNGSGMCKAG FAGDDAPRAV FPSIVGRPRH QGVMVGMGQK
51 DSYVGDEAQS KRGILTLKYP IEHGIVTNWE DMEKIWHHTF YNELRVAPEE
101 HPVLLTEAPL NPKANREKMT QIMFETFNTP AMYVAIQAVL SLYASGRITG
151 IVMDSGDGVT HTPVIYEGYA LPHAILRLDL AGRDLTDYLM KILTERGYSF
201 TTAEREIVR DIKEKLCYVA LDFEQEMATA ASSSSLEKSY ELPDGQVITI
251 GNERFRCPEA LFQPSFLGME SCGIHETTFN SIMKCDVDIR KDLYANTVLS
301 GTTMYPGIA DRMQKEITAL APSTMKIKII APPERKYSVW IGGASILASLS
351 TFQQMWISKQ EYDESGPSIV HRKCF
```

Show predicted peptides also

Sort Peptides By

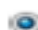

Residue Number

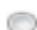

Increasing Mass

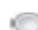

Decreasing Mass

| Start | End | Observed  | Mr(expt)  | Mr(calc)  | ppm | Miss | Sequence                  |              |
|-------|-----|-----------|-----------|-----------|-----|------|---------------------------|--------------|
| 19    | 28  | 976.5027  | 975.4955  | 975.4410  | 56  | 0    | K.AGFAGDDAPR.A            |              |
| 29    | 39  | 1198.7769 | 1197.7696 | 1197.6982 | 60  | 0    | R.AVFPSIVGRPR.H           |              |
| 40    | 50  | 1171.6378 | 1170.6305 | 1170.5638 | 57  | 0    | R.HQGVMVGMGQK.D           |              |
| 40    | 50  | 1173.6477 | 1172.6404 | 1172.5318 | 93  | 0    | R.HQGVMVGMGQK.D           | 2 Deamidated |
| 40    | 50  | 1187.6346 | 1186.6273 | 1186.5587 | 58  | 0    | R.HQGVMVGMGQK.D           | Oxidation    |
| 40    | 50  | 1203.6329 | 1202.6256 | 1202.5536 | 60  | 0    | R.HQGVMVGMGQK.D           | 2 Oxidation  |
| 51    | 62  | 1354.7119 | 1353.7046 | 1353.6161 | 65  | 1    | K.DSYVGDEAQS.KR.G         |              |
| 69    | 84  | 1961.0471 | 1960.0398 | 1959.9036 | 69  | 0    | K.YPIEHGIVTNWEDMEK.I      |              |
| 69    | 84  | 1977.0839 | 1976.0766 | 1975.8986 | 90  | 0    | K.YPIEHGIVTNWEDMEK.I      | Oxidation    |
| 85    | 95  | 1515.8496 | 1514.8423 | 1514.7419 | 66  | 0    | K.IWHHTFYNELR.V           |              |
| 85    | 95  | 1516.8330 | 1515.8257 | 1515.7259 | 66  | 0    | K.IWHHTFYNELR.V           | Deamidated   |
| 96    | 113 | 1954.1995 | 1953.1922 | 1953.0571 | 69  | 0    | R.VAPEEHPVLLTEAPLNPK.A    |              |
| 96    | 116 | 2295.3442 | 2294.3369 | 2294.2382 | 43  | 1    | R.VAPEEHPVLLTEAPLNPKANR.E |              |

# M11

4700 MS/MS Precursor 1515.85 Spec #1 MC[BP = 110.1, 4191]

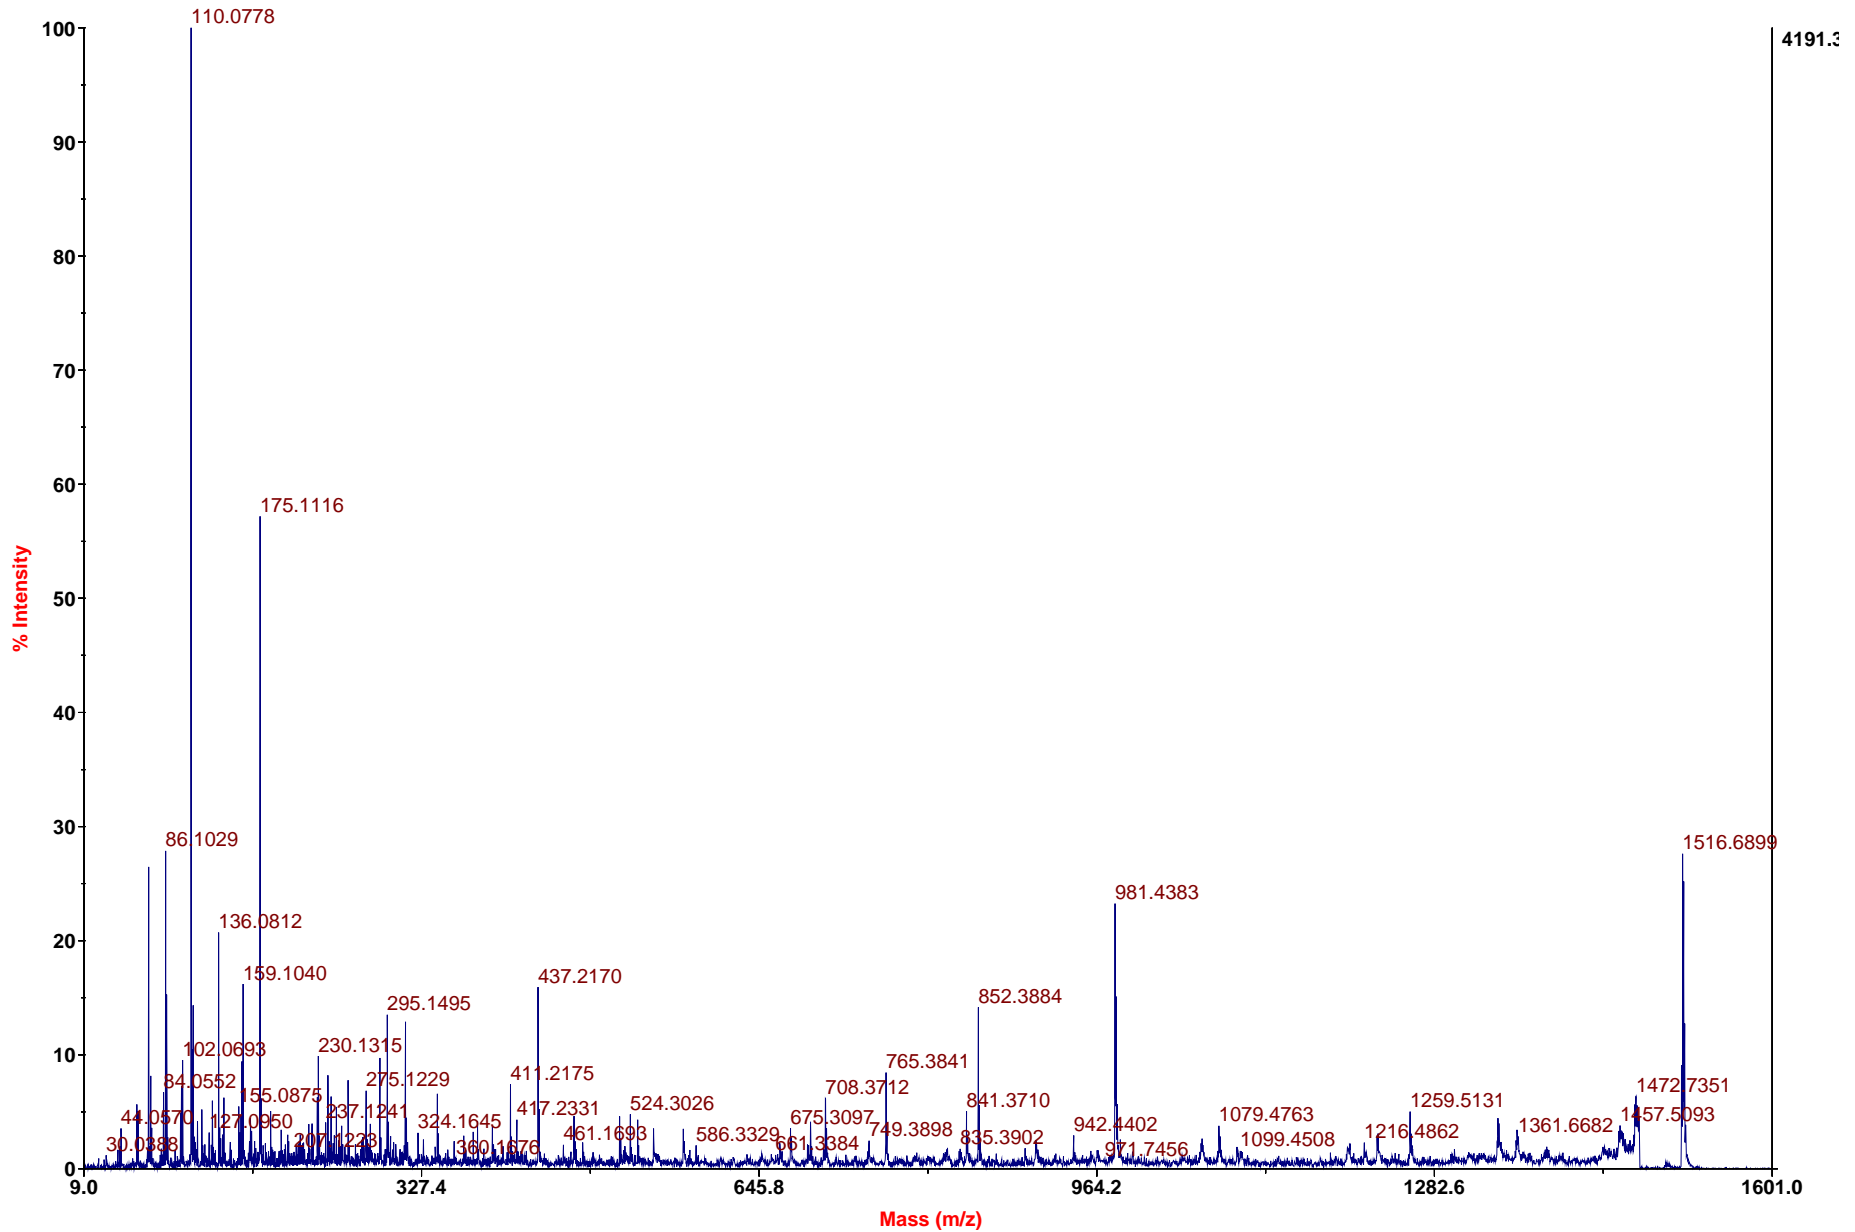

# M11

4700 MS/MS Precursor 1132.59 Spec #1 MC[BP = 175.1, 3537]

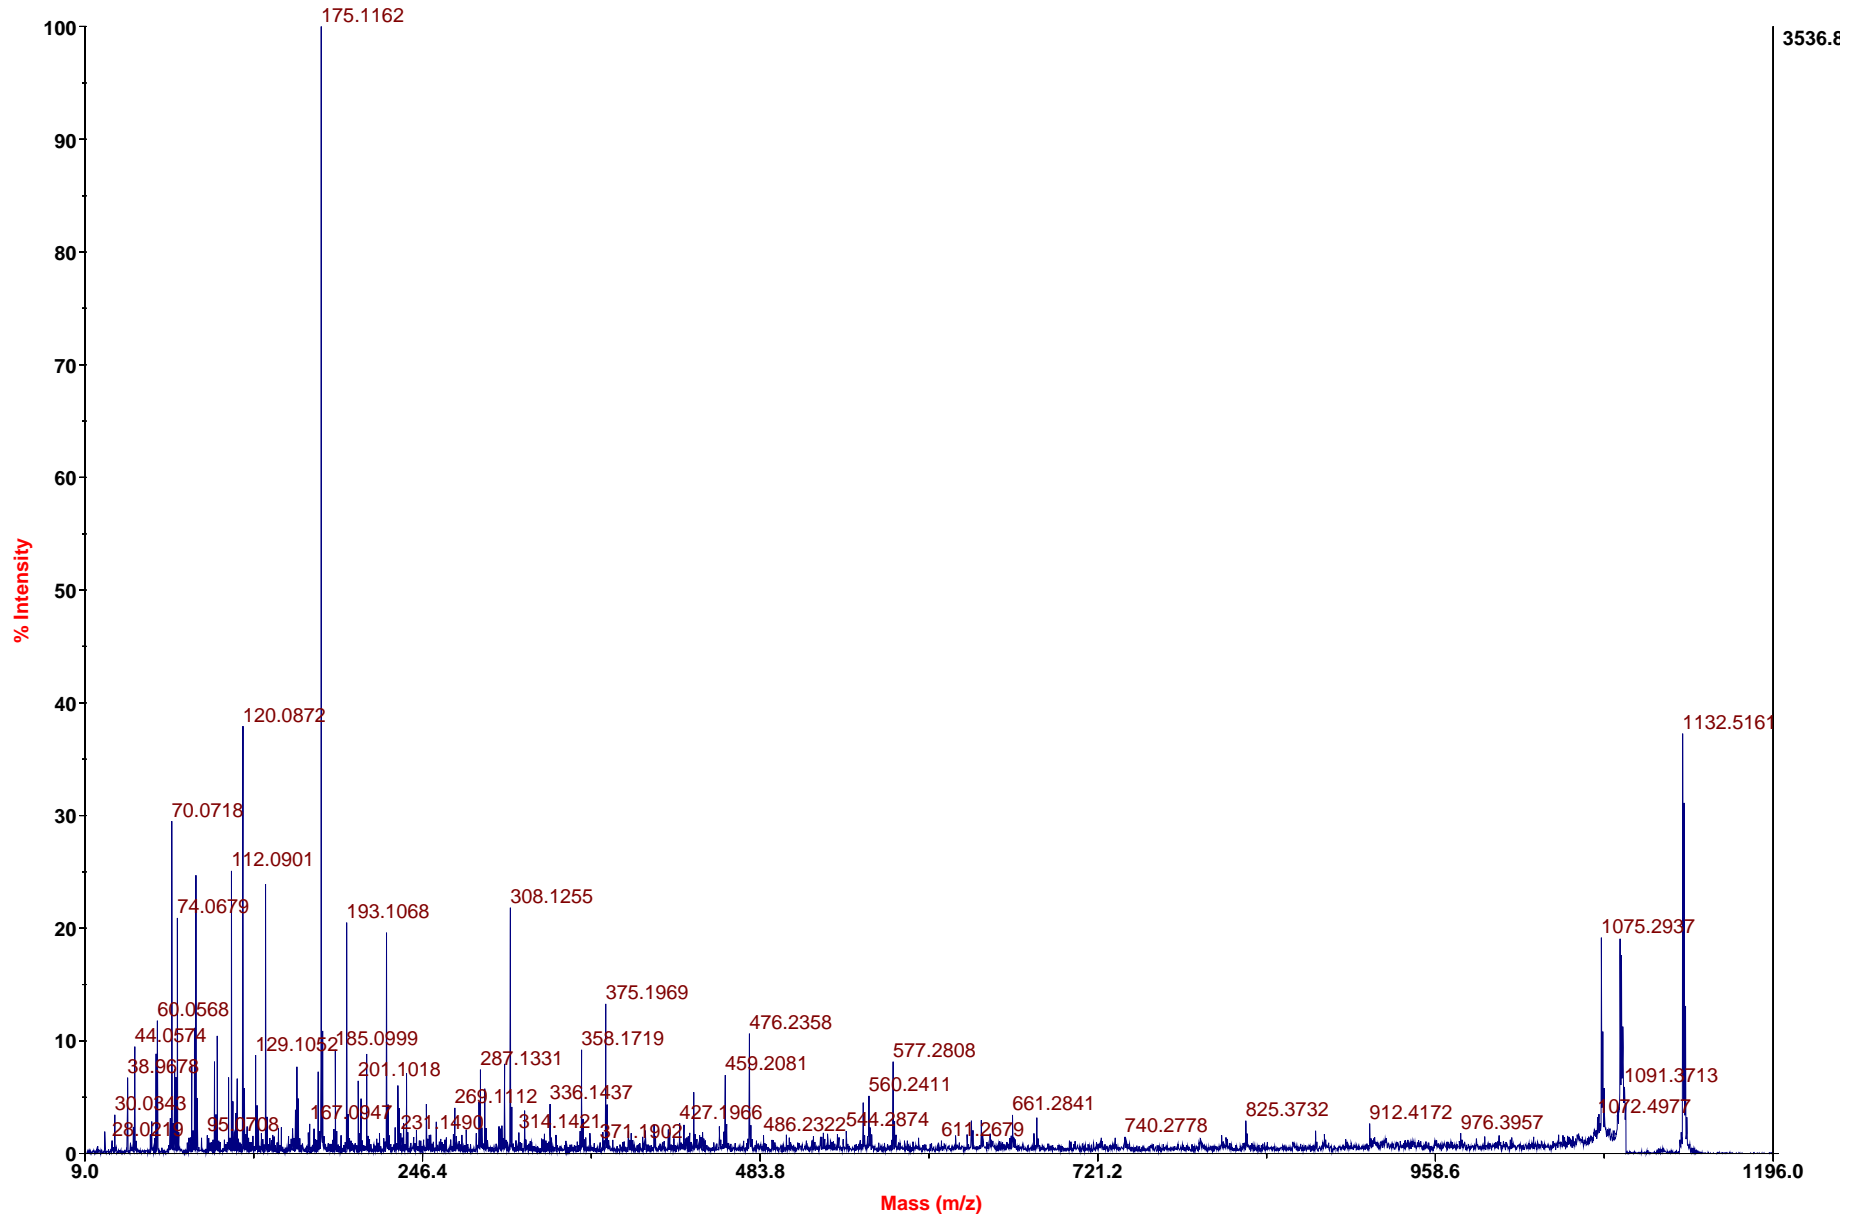



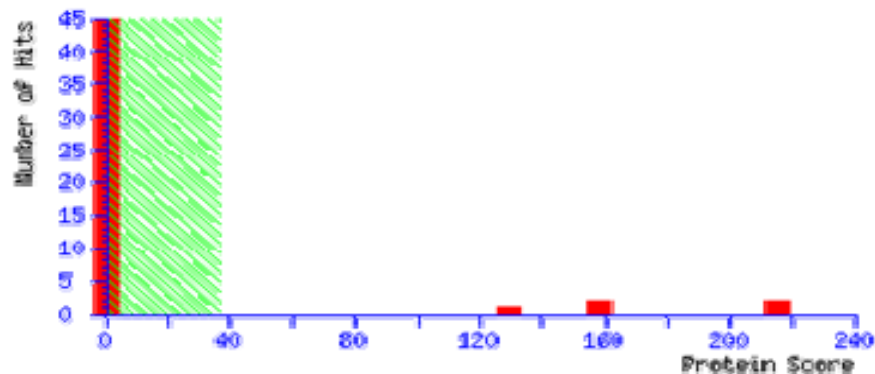

## Peptide Summary Report

Format As

Peptide Summary

[Help](#)

Significance threshold  $p < 0.05$

Max. number of hits **AUTO**

Standard scoring  MudPIT scoring

Ions score or expect cut-off **0**

Show sub-sets **0**

Show pop-ups  Suppress pop-ups

Sort unassigned **Decreasing Score**

Require bold red

Select All

Select None

Search Selected

Error tolerant

1. [CAA27396](#) Mass: 39161 Score: 215 Matches: 13(8) Sequences: 11(8) emPAI: 2.23

MMACTBR2 NID: - Mus musculus

Check to include this hit in error tolerant search

| Query                                                  | Observed  | Mr(expt)  | Mr(calc)  | ppm  | Miss | Score | Expect  | Rank | Unique | Peptide                              |
|--------------------------------------------------------|-----------|-----------|-----------|------|------|-------|---------|------|--------|--------------------------------------|
| <input checked="" type="checkbox"/> <a href="#">1</a>  | 923.6166  | 922.6093  | 922.5600  | 53.5 | 1    | 18    | 0.64    | 1    |        | K.IIAPPERK.Y                         |
| <input checked="" type="checkbox"/> <a href="#">2</a>  | 945.6028  | 944.5956  | 944.5444  | 54.2 | 0    | 37    | 0.028   | 1    | U      | R.AVFPSIVGR.S                        |
| <input checked="" type="checkbox"/> <a href="#">4</a>  | 998.5252  | 997.5179  | 997.4790  | 39.0 | 0    | 8     | 37      | 1    |        | R.DLTDYLMK.I                         |
| <input checked="" type="checkbox"/> <a href="#">8</a>  | 1132.5944 | 1131.5871 | 1131.5197 | 59.6 | 0    | 58    | 0.00054 | 1    |        | R.GYSFTTTAER.E                       |
| <input checked="" type="checkbox"/> <a href="#">10</a> | 1171.6378 | 1170.6305 | 1170.5638 | 57.0 | 0    | 81    | 2.1e-06 | 1    |        | R.HQGV <del>M</del> VGMGQK.D         |
| <input checked="" type="checkbox"/> <a href="#">11</a> | 1187.6346 | 1186.6273 | 1186.5587 | 57.8 | 0    | (18)  | 5.4     | 1    |        | R.HQGV <del>M</del> VGMGQK.D + Oxida |
| <input checked="" type="checkbox"/> <a href="#">13</a> | 1354.7119 | 1353.7046 | 1353.6161 | 65.4 | 1    | 39    | 0.037   | 1    |        | K.DSYVGDEAQS <del>K</del> .G         |
| <input checked="" type="checkbox"/> <a href="#">15</a> | 1515.8496 | 1514.8423 | 1514.7419 | 66.3 | 0    | 27    | 0.45    | 1    |        | K.IWHHTFYNELR.V                      |
| <input checked="" type="checkbox"/> <a href="#">16</a> | 1791.0154 | 1790.0081 | 1789.8846 | 69.0 | 0    | 60    | 0.00021 | 1    |        | K.SYELPDGQVITIGNER.F                 |
| <input checked="" type="checkbox"/> <a href="#">24</a> | 1954.1995 | 1953.1922 | 1953.0571 | 69.2 | 0    | 42    | 0.0051  | 1    |        | R.VAPEEHPVLLTEAPLNPK.A               |

# Protein View

Match to: **CAA27396** Score: 215

**MMACTBR2** NID: - **Mus musculus**

Found in search of ppw\_K2\_129990855410.txt

Nominal mass ( $M_r$ ): 39161; Calculated pI value: 5.78

NCBI BLAST search of [CAA27396](#) against nr

Unformatted [sequence string](#) for pasting into other applications

Taxonomy: [Mus musculus](#)

Links to retrieve other entries containing this sequence from NCBI Entrez:  
(no taxonomy information for this entry)

Variable modifications: Carbamidomethyl (C), Deamidated (NQ), Oxidation (M)

Cleavage by Trypsin: cuts C-term side of KR unless next residue is P

Sequence Coverage: 44%

Matched peptides shown in **Bold Red**

```
1  PRAVFPSIVG RSRHQGVMVG MGQKDSYVGD EAQSKRGILT LKYPIEHGIV
51  TNWDDMEKIW HHTFYNELRV APEEHPVLLT EAPLNPKANR EKMTQIMFET
101 FNTLPAMYVAI QAVLSLYASG RTTGIVMDSG DGVTHTVPIY EGYALPHAIL
151 RLDLAGRDLT DYLMKILTER GYSFTTTAER EIVRDIKEKL CYVALDFEQE
201 MATAASSSSL EKSYELPDGQ VITIGNERFR CPEALFQPSF LGMESCGIHE
251 TTFNSIMKCD VDIRKDLYAN TVLSGGTTMY PGIADRMQKE ITALAPSTMK
301 IKIAPPERK YSVWIGGSIL ASLSTFQQMW ISKQYDESG PSIVHRKCF
```

Show predicted peptides also

Sort Peptides By

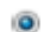

Residue Number

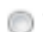

Increasing Mass

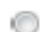

Decreasing Mass

| Start - End | Observed  | Mr(expt)  | Mr(calc)  | ppm | Miss | Sequence                                                             |
|-------------|-----------|-----------|-----------|-----|------|----------------------------------------------------------------------|
| 3 - 11      | 945.6028  | 944.5956  | 944.5444  | 54  | 0    | R.AVFPSIVGR.S ( <a href="#">Ions score 37</a> )                      |
| 14 - 24     | 1171.6378 | 1170.6305 | 1170.5638 | 57  | 0    | R.HQGVMVGMGQK.D ( <a href="#">Ions score 81</a> )                    |
| 14 - 24     | 1187.6346 | 1186.6273 | 1186.5587 | 58  | 0    | R.HQGVMVGMGQK.D Oxidation (M) ( <a href="#">Ions score 81</a> )      |
| 25 - 36     | 1354.7119 | 1353.7046 | 1353.6161 | 65  | 1    | K.DSYVGDEAQSQR.G ( <a href="#">Ions score 39</a> )                   |
| 59 - 69     | 1515.8496 | 1514.8423 | 1514.7419 | 66  | 0    | K.IWHHTFYNELR.V ( <a href="#">Ions score 27</a> )                    |
| 70 - 87     | 1954.1995 | 1953.1922 | 1953.0571 | 69  | 0    | R.VAPEEHPVLLTEAPLNPK.A ( <a href="#">Ions score 42</a> )             |
| 122 - 151   | 3183.8391 | 3182.8318 | 3182.6071 | 71  | 0    | R.TTGIVMDSGDGVTHTVPIYEGYALPHAILR.L ( <a href="#">Ions score 81</a> ) |
| 158 - 165   | 998.5252  | 997.5179  | 997.4790  | 39  | 0    | R.DLTDYLMK.I ( <a href="#">Ions score 8</a> )                        |
| 171 - 180   | 1132.5944 | 1131.5871 | 1131.5197 | 60  | 0    | R.GYSFTTTAER.E ( <a href="#">Ions score 58</a> )                     |
| 213 - 228   | 1791.0154 | 1790.0081 | 1789.8846 | 69  | 0    | K.SYELPDGQVITIGNER.F ( <a href="#">Ions score 60</a> )               |

Sample M12

4700 Reflector Spec #1 MC=>NR(2.00)[BP = 1479.9, 14361]

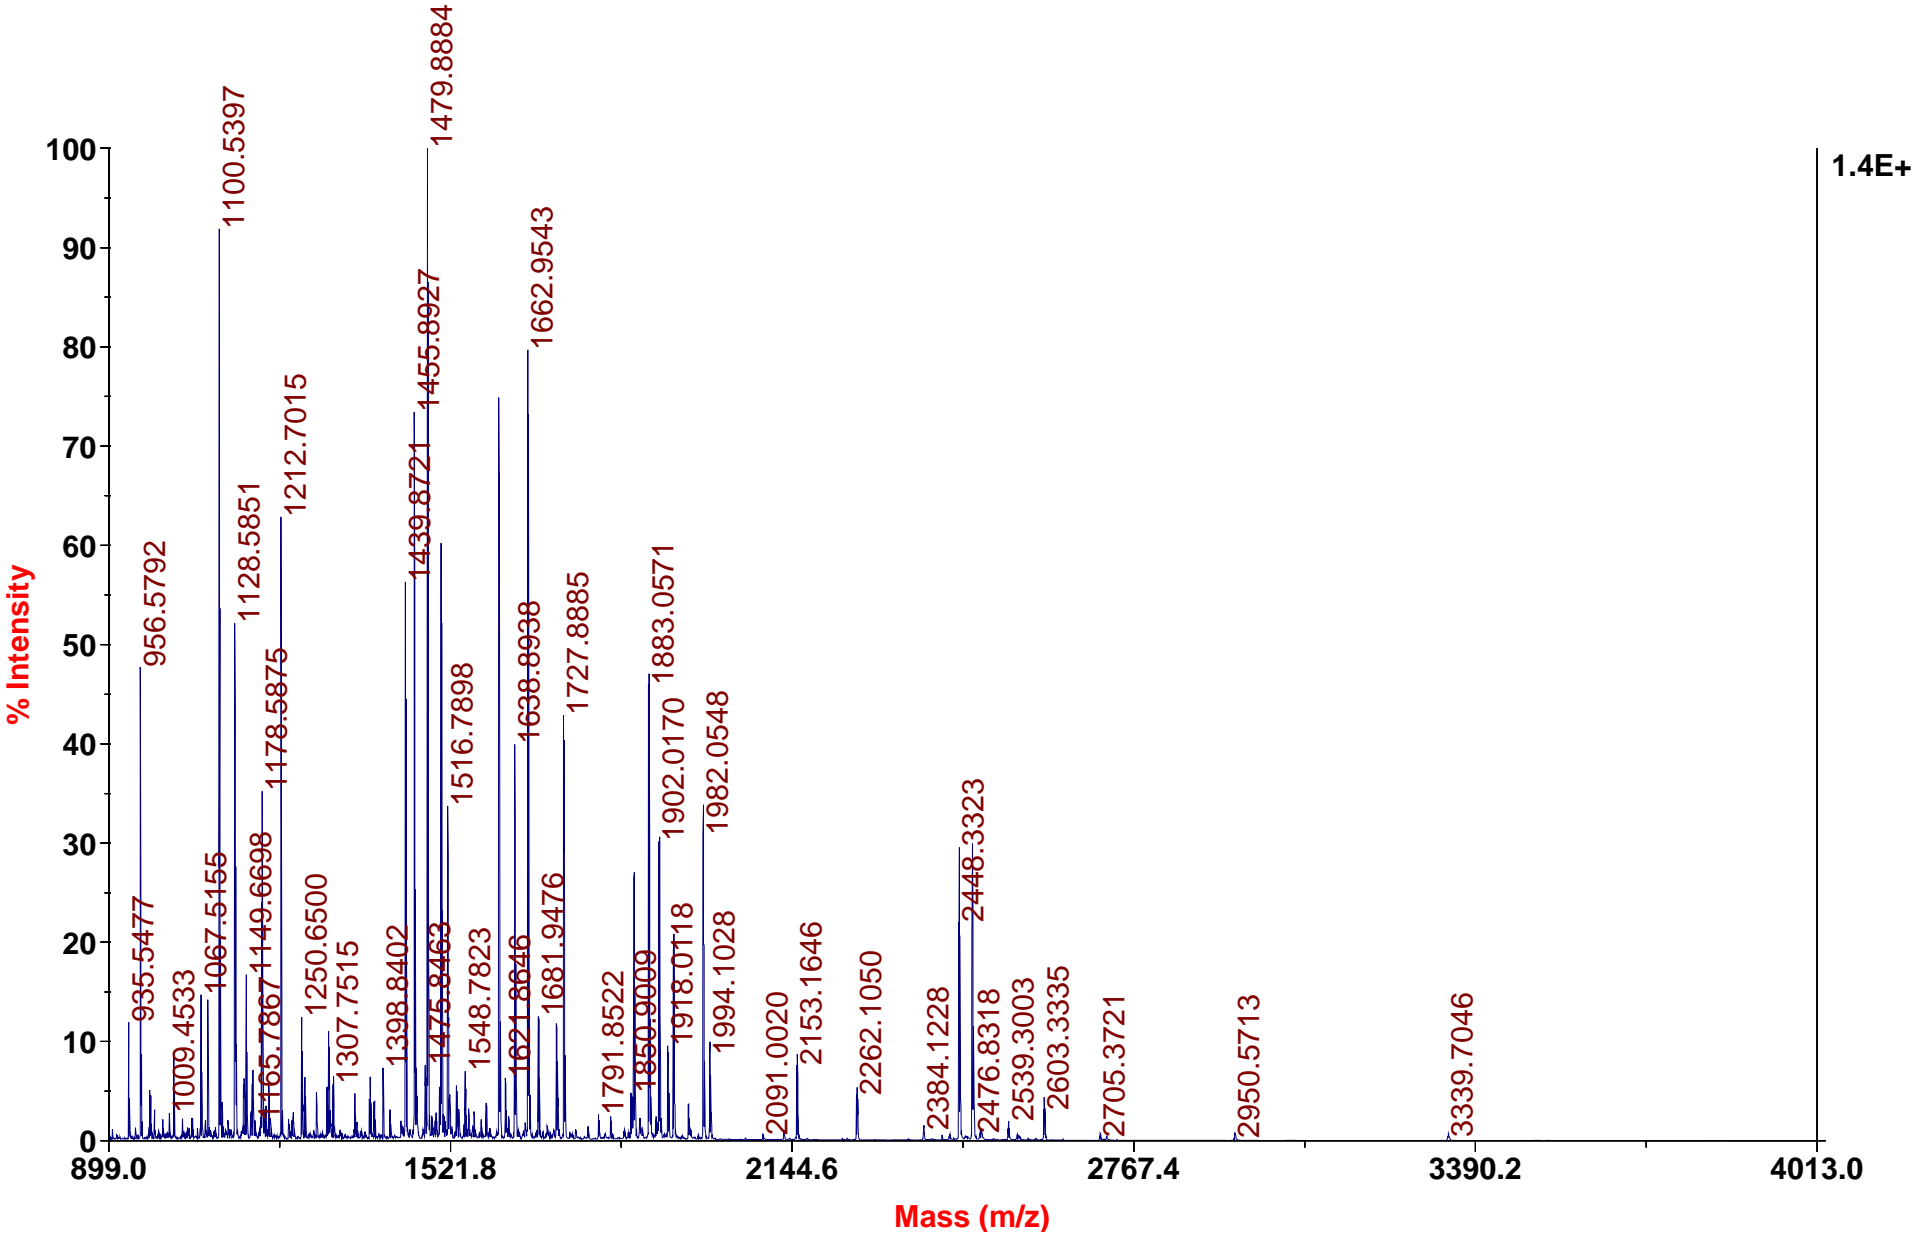

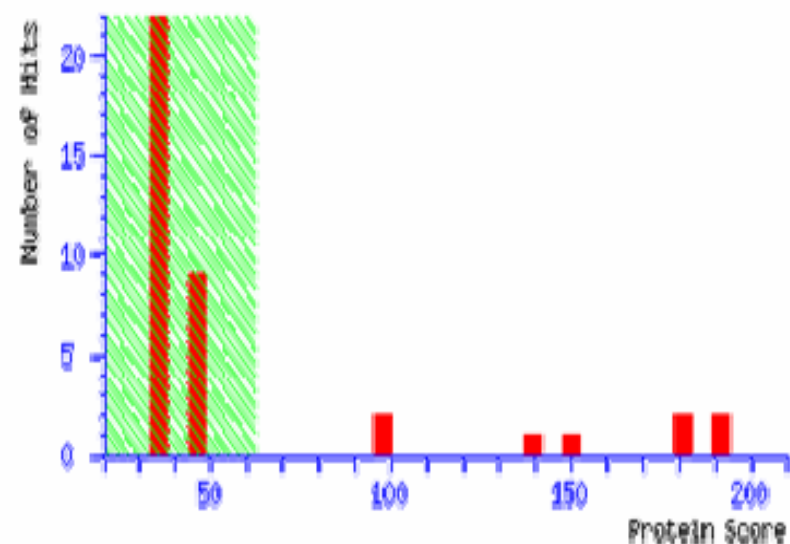

## Concise Protein Summary Report

Format As

Concise Protein Summary

[Help](#)

Significance threshold  $p <$

Max. number of hits

1. **Mixture 1** Total score: **192** Expect:  $5.8e-15$  Matches: 76

Components (only one family member shown for each component):

[Q8C7C7 MOUSE](#) Mass: 64961 Score: **154** Expect:  $3.7e-11$  Matches: 54

2 days neonate thymus thymic cells cDNA, RIKEN full-length enriched library, clone:C920028B14 product:albumin 1,

[AAB49490](#) Mass: 50514 Score: **98** Expect:  $1.4e-05$  Matches: 27

MMU89889 NID: - Mus musculus

## Protein View

Match to: Q8C7C7\_MOUSE Score: 154 Expect: 3.7e-11

2 days neonate thymus thymic cells cDNA, RIKEN full-length enriched library, clone:C920028B14 pro  
Found in search of pmf\_L2\_129990849011.txt

Nominal mass ( $M_r$ ): 64961; Calculated pI value: 5.49

NCBI BLAST search of [Q8C7C7\\_MOUSE](#) against nr

Unformatted [sequence string](#) for pasting into other applications

Taxonomy: [Mus musculus](#)

Links to retrieve other entries containing this sequence from NCBI Entrez:  
(no taxonomy information for this entry)

Variable modifications: Carbamidomethyl (C), Deamidated (NQ), Oxidation (M)

Cleavage by Trypsin: cuts C-term side of KR unless next residue is P

Number of mass values searched: 164

Number of mass values matched: 54

Sequence Coverage: 71%

Matched peptides shown in **Bold Red**

```
1  NRYNDLGEQH FKGLVLIAFS QYLQKCSYDE HAKLVQEVTD FAKTCVADES
51 AANCDKSLHT LFGDKLCAIP NLRENYGELA DCCTKQEPER NECFLQHKDD
101 NPSLPPFERP EAEAMCTSEFK ENPTTFMGHY LHEVARRRHPY FYAPELLYYA
151 EQYNEILTQC CAEADKESCL TPKLDGVKEK ALVSSVRQRM KCSSMQKFGF
201 RAFKAWAVAR LSQTFPNADF AEITKLATDL TKVKNK ECCHG DLLECADDRA
251 ELAKYMCENQ ATISSKLQTC CDKPLLKKAH CLSEVEHDTM PADLPAIAAD
301 FVEDQEVCKN YAEAKDVFLG TFLYEYSRRH PDYSVSLLLR LAKKYEATLE
351 KCCAEANPPA CYGTVLAEFQ PLVEEPKNLV KTNCDLYEKL GEYGFQNAIL
401 VRYTQKAPQV STPTLVEAAR NLGRVGTKCC TLPEDQRLPC VEDYLSAILN
451 RVCLLHEKTP VSEHVTKCCS GSLVERPCF SALTVDETYV PKEFKAETFT
501 FHSDICTLPE KEKQIKKQTA LAELVHKHFK ATAEQLKTVM DDEFAQFLDTC
551 CKAADKDTCF STEGPNLVTR CKDALA
```

Show predicted peptides also

Sort Peptides By

Residue Number  Increasing Mass  Decreasing Mass

| Start | End | Observed  | Mr(expt)  | Mr(calc)  | ppm | Miss | Sequence                              |
|-------|-----|-----------|-----------|-----------|-----|------|---------------------------------------|
| 1     | 12  | 1520.8607 | 1519.8534 | 1519.7168 | 90  | 1    | <b>-.NRYNDLGEQHFK.G</b>               |
| 3     | 12  | 1250.6466 | 1249.6393 | 1249.5727 | 53  | 0    | <b>R.YNDLGEQHFK.G</b>                 |
| 3     | 25  | 2711.5913 | 2710.5840 | 2710.4119 | 64  | 1    | <b>R.YNDLGEQHFKGLVLIAFSQYLQK.C</b>    |
| 13    | 25  | 1479.8870 | 1478.8797 | 1478.8497 | 20  | 0    | <b>K.GLVLIAFSQYLQK.C</b>              |
| 13    | 33  | 2470.3696 | 2469.3623 | 2469.2362 | 51  | 1    | <b>K.GLVLIAFSQYLQKCSYDEHAK.L</b> Carb |
| 13    | 33  | 2472.3184 | 2471.3111 | 2471.2042 | 43  | 1    | <b>K.GLVLIAFSQYLQKCSYDEHAK.L</b> Carb |
| 26    | 33  | 1009.4545 | 1008.4472 | 1008.3971 | 50  | 0    | <b>K.CSYDEHAK.L</b> Carbamidomethyl ( |
| 34    | 43  | 1149.6699 | 1148.6626 | 1148.6077 | 48  | 0    | <b>K.LVQEVTDFAK.T</b>                 |
| 57    | 65  | 1017.5802 | 1016.5729 | 1016.5291 | 43  | 0    | <b>K.SLHTLFGDK.L</b>                  |
| 57    | 73  | 1898.0306 | 1897.0233 | 1897.0244 | -1  | 1    | <b>K.SLHTLFGDKLCAIPNLR.E</b>          |

## Protein View

Match to: **AAB49490** Score: 98 Expect: 1.4e-05  
MMU89889 NID: - Mus musculus  
Found in search of pmf\_L2\_129990849011.txt

Nominal mass ( $M_r$ ): 50514; Calculated pI value: 7.32  
NCBI BLAST search of [AAB49490](#) against nr  
Unformatted [sequence string](#) for pasting into other applications

Taxonomy: [Mus musculus](#)

Variable modifications: Carbamidomethyl (C), Deamidated (NQ), Oxidation (M)  
Cleavage by Trypsin: cuts C-term side of KR unless next residue is P  
Number of mass values searched: 164  
Number of mass values matched: 27  
Sequence Coverage: 56%

Matched peptides shown in **Bold Red**

```
1 ALNILVLLGL CWSLAVASPL PTANGRVAEV ENGTKPDSDV PEHCLDTWSF
51 DAATMDHNGT MLFFPKGEFVW RGHSGTRELI SARWKNPITS VDAAFRGPDS
101 VFLIKEDKWV YPPEKKENG YPKLFQEEFP GIPYPPDAAV ECHRGECQSE
151 GVLEFFQGNRK WFWDFATRTQ KERSWSTVGN CTAALRWLER YYCFQGNKFL
201 RFNPVTGEVP PRYPLDARDY FVSCPGQGHG RFRNGTAHGN STHPMHSRCS
251 PDPGLTALLS DHRGATYAFT GSHYWRLDSS RDGWHSWPIA HHWPQGPSTV
301 DAAFSWDDKV YLIQGTQVYV FLTKGGNNLV SGYPKRLEKE LGSPPGISLE
351 TIDAAFSCPG SSRLYVSSGR RLWWLDLKSG AQATWTEVSW PHEKVDGALC
401 LDKSLGPNTC SSNGSSLYFI HGPNLYCYSS IDKLNAAKSL PQPQKVSILG
451 CSQ
```

Show predicted peptides also

Sort Peptides By

Residue Number  Increasing Mass  Decreasing Mass

| Start - End | Observed  | Mr(expt)  | Mr(calc)  | ppm | Miss | Sequence                                  |
|-------------|-----------|-----------|-----------|-----|------|-------------------------------------------|
| 84 - 96     | 1504.8777 | 1503.8704 | 1503.7834 | 58  | 1    | R. <b>WKNPITSVDAAFR.G</b>                 |
| 86 - 96     | 1190.6776 | 1189.6703 | 1189.6091 | 51  | 0    | K. <b>NPITSVDAAFR.G</b>                   |
| 97 - 105    | 975.5921  | 974.5848  | 974.5437  | 42  | 0    | R. <b>GPDSVFLIK.E</b>                     |
| 97 - 108    | 1347.7872 | 1346.7799 | 1346.7082 | 53  | 1    | R. <b>GPDSVFLIKEDK.V</b>                  |
| 109 - 116   | 1017.5802 | 1016.5729 | 1016.5331 | 39  | 0    | K. <b>VWVYPPEK.K</b>                      |
| 109 - 117   | 1145.6559 | 1144.6486 | 1144.6281 | 18  | 1    | K. <b>VWVYPPEKK.E</b>                     |
| 124 - 144   | 2472.3184 | 2471.3111 | 2471.1580 | 62  | 0    | K. <b>LFQEEFPGIPYPPDAAVECHR.G</b> Carbami |
| 145 - 159   | 1727.8855 | 1726.8782 | 1726.7733 | 61  | 0    | R. <b>GECQSEGVLFFQGNR.K</b> Carbamidometh |
| 145 - 160   | 1855.9944 | 1854.9871 | 1854.8683 | 64  | 1    | R. <b>GECQSEGVLFFQGNRK.W</b> Carbamidomet |
| 160 - 168   | 1256.6888 | 1255.6815 | 1255.6138 | 54  | 1    | R. <b>KFWDFATR.T</b>                      |
| 161 - 168   | 1128.5824 | 1127.5751 | 1127.5189 | 50  | 0    | K. <b>WFWDFATR.T</b>                      |
| 191 - 198   | 1079.5121 | 1078.5048 | 1078.4542 | 47  | 0    | R. <b>YYCFQGNK.F</b> Carbamidomethyl (C)  |



# M12

4700 MS/MS Precursor 1479.89 Spec #1 MC[BP = 175.1, 4373]

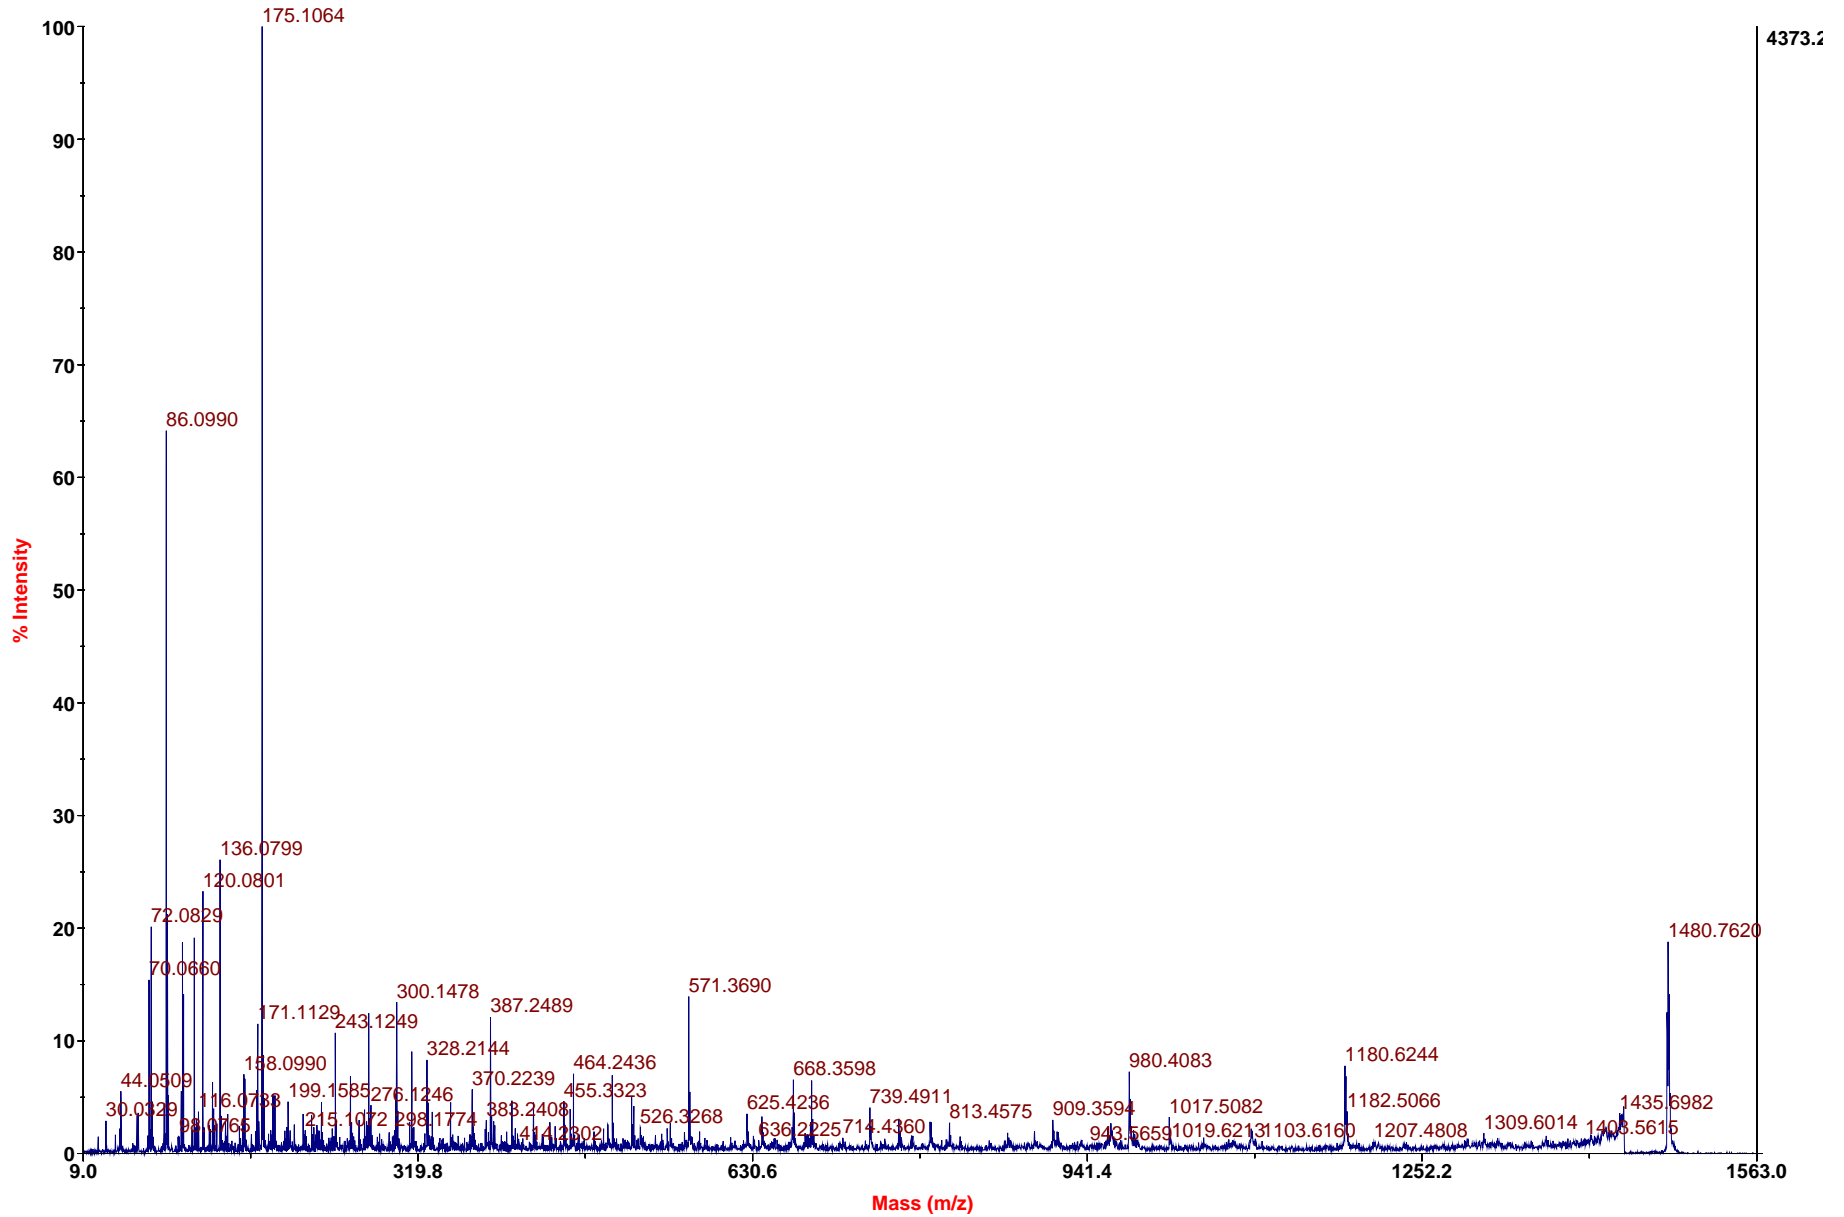

# M12

4700 MS/MS Precursor 1609.88 Spec #1 MC[BP = 120.1, 3103]

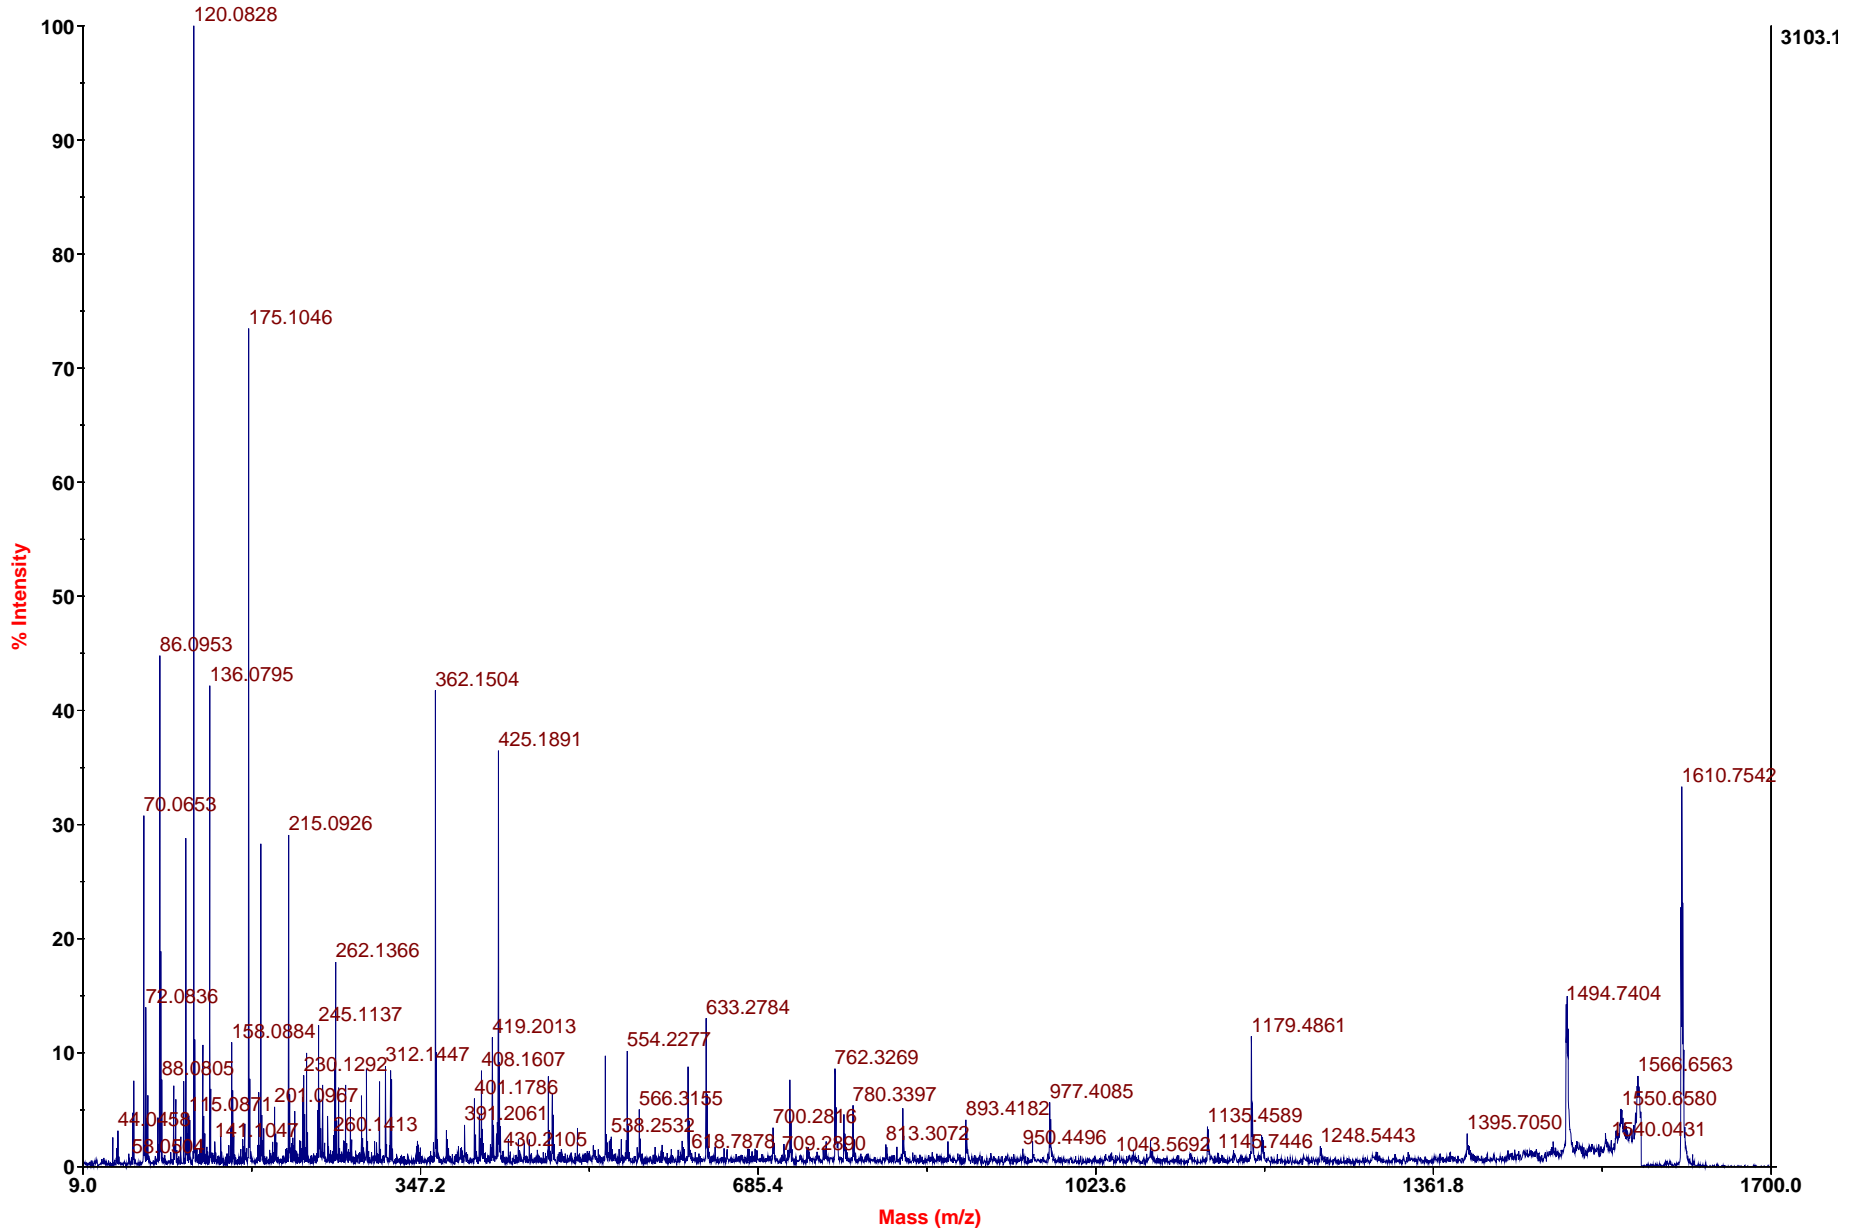



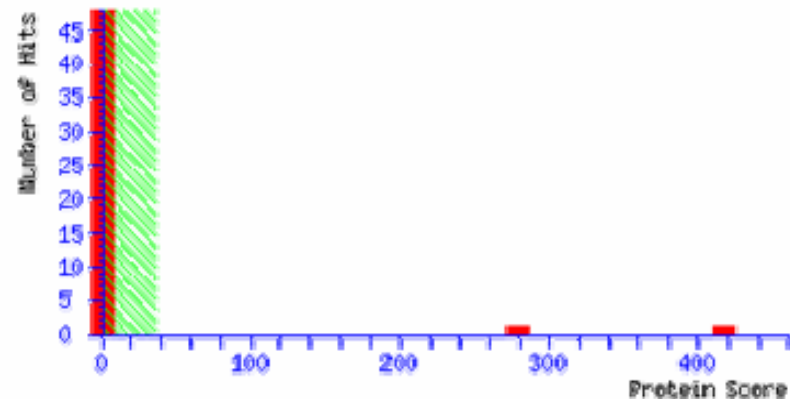

## Peptide Summary Report

Format As Peptide Summary

[Help](#)

Significance threshold  $p <$

Max. number of hits

Standard scoring  MudPIT scoring

Ions score or expect cut-off

Show sub-sets

Show pop-ups  Suppress pop-ups

Sort unassigned

Require bold red

Select All

Select None

Search Selected

Error tolerant

1. [Q3UKP2\\_MOUSE](#) Mass: 51285 Score: 417 Matches: 10(9) Sequences: 10(9) emPAI: 1.72  
 14 days embryo liver cDNA, RIKEN full-length enriched library, clone:I530016F13 product:hempoxin, full insert s  
 Check to include this hit in error tolerant search

| Query                                                  | Observed  | Mr(expt)  | Mr(calc)  | ppm  | Miss | Score | Expect  | Rank | Unique | Peptide                                   |
|--------------------------------------------------------|-----------|-----------|-----------|------|------|-------|---------|------|--------|-------------------------------------------|
| <input checked="" type="checkbox"/> <a href="#">2</a>  | 1100.5388 | 1099.5315 | 1099.4757 | 50.8 | 0    | 45    | 0.01    | 1    | U      | R.DYFVSC_PGR.G + Carbamidomethyl (C)      |
| <input checked="" type="checkbox"/> <a href="#">3</a>  | 1128.5824 | 1127.5751 | 1127.5189 | 49.9 | 0    | 18    | 4.3     | 1    | U      | K.WFWDFA.T                                |
| <input checked="" type="checkbox"/> <a href="#">5</a>  | 1212.7012 | 1211.6939 | 1211.6299 | 52.9 | 0    | 65    | 5.1e-05 | 1    | U      | R.FNPVTGEVPPR.Y                           |
| <input checked="" type="checkbox"/> <a href="#">9</a>  | 1504.8777 | 1503.8704 | 1503.7834 | 57.9 | 1    | 56    | 0.00054 | 1    | U      | R.WKNPITSVDAAFR.G                         |
| <input checked="" type="checkbox"/> <a href="#">10</a> | 1516.7863 | 1515.7790 | 1515.6895 | 59.1 | 0    | 53    | 0.0016  | 1    | U      | R.GATYAFTGSHYWR.L                         |
| <input checked="" type="checkbox"/> <a href="#">12</a> | 1638.8927 | 1637.8854 | 1637.7832 | 62.4 | 0    | 79    | 3.4e-06 | 1    | U      | R.CSPDPGLTALLSDHR.G + Carbamidomethyl (C) |
| <input checked="" type="checkbox"/> <a href="#">14</a> | 1727.8855 | 1726.8782 | 1726.7733 | 60.7 | 0    | 112   | 2e-09   | 1    | U      | R.GECQSEGVLFFQGNR.K + Carbamidomethyl (C) |

## Protein View

Match to: Q3UKP2\_MOUSE score: 417

14 days embryo liver cDNA, RIKEN full-length enriched library, clone:I530016F13 product:hempoxin, full ins

Found in search of ppw\_L2\_129990855611.txt

Nominal mass ( $M_r$ ): 51285; Calculated pI value: 7.92

NCBI BLAST search of [Q3UKP2\\_MOUSE](#) against nr

Unformatted [sequence string](#) for pasting into other applications

Taxonomy: [Mus musculus](#)

Links to retrieve other entries containing this sequence from NCBI Entrez:

(no taxonomy information for this entry)

Variable modifications: Carbamidomethyl (C), Deamidated (NQ), Oxidation (M)

Cleavage by Trypsin: cuts C-term side of KR unless next residue is P

Sequence Coverage: 28%

Matched peptides shown in **Bold Red**

```
1 MARTAVALNI LVLLGLCWSL AVASPLPTAN GRVAEVENGT KPDSDVPEHC
51 LDIWSFDAAT MDHNGTMLFF KGEFVWRGHS GTRELISARW KNPITSVDAA
101 FRGPDSVFLI KEDKVVVYFP EKKENGYPKL FQEEFPGIPY PPDAAVECHR
151 GECQSEGVLF FQGNRKFWD FATRTQKERS WSTVGNCTAA LRWLERYYCF
201 QGNKFLRFNP VTGEVPPRY LDARDYFVSC PGRGHGRPRN GTAHGNSTHP
251 MHSRCSPDPG LTALLSDHRG ATYAFTGSHY WRLDSSRDGW HSWPIAHHWP
301 QGPSTVDAAF SWDDKVYLIQ GTQVYVFLTK GGNNLVSGYP KRLEKELGSP
351 PGISLETIDA AFSCPGSSRL YVSSGRRLWW LDLKSGAQT WTEVSWPHEK
401 VDGALCLDKS LGPNTCSSNG SSLYFIHGPN LYCYSSIDKL NAAKSLPQPQ
451 KVNSILGCSQ
```

Show predicted peptides also

Sort Peptides By

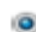

Residue Number

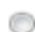

Increasing Mass

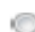

Decreasing Mass

| Start | End | Observed  | Mr(expt)  | Mr(calc)  | ppm | Miss | Sequence                                                                   |
|-------|-----|-----------|-----------|-----------|-----|------|----------------------------------------------------------------------------|
| 90    | 102 | 1504.8777 | 1503.8704 | 1503.7834 | 58  | 1    | <b>R.WKNPITSVDAAFR.G</b> ( <a href="#">Ions score 56</a> )                 |
| 130   | 150 | 2472.3184 | 2471.3111 | 2471.1580 | 62  | 0    | <b>K.LFQEEFPGIPYPPDAAVECHR.G</b> Carbamidomethyl (C)                       |
| 151   | 165 | 1727.8855 | 1726.8782 | 1726.7733 | 61  | 0    | <b>R.GECQSEGVLEFFQGNR.K</b> Carbamidomethyl (C)                            |
| 151   | 166 | 1855.9944 | 1854.9871 | 1854.8683 | 64  | 1    | <b>R.GECQSEGVLEFFQGNRK.W</b> Carbamidomethyl (C)                           |
| 167   | 174 | 1128.5824 | 1127.5751 | 1127.5189 | 50  | 0    | <b>K.WFWDFAFR.T</b> ( <a href="#">Ions score 18</a> )                      |
| 208   | 218 | 1212.7012 | 1211.6939 | 1211.6299 | 53  | 0    | <b>R.FNPVTGEVPPR.Y</b> ( <a href="#">Ions score 65</a> )                   |
| 225   | 233 | 1100.5388 | 1099.5315 | 1099.4757 | 51  | 0    | <b>R.DYFVSCPGR.G</b> Carbamidomethyl (C) ( <a href="#">Ions score 53</a> ) |
| 255   | 269 | 1638.8927 | 1637.8854 | 1637.7832 | 62  | 0    | <b>R.CSPDPGLTALLSDHR.G</b> Carbamidomethyl (C)                             |
| 270   | 282 | 1516.7863 | 1515.7790 | 1515.6895 | 59  | 0    | <b>R.GATYAFTGSHYWR.L</b> ( <a href="#">Ions score 53</a> )                 |
| 346   | 369 | 2448.3303 | 2447.3230 | 2447.1638 | 65  | 0    | <b>K.ELGSPPGISLETIDAAFSCPGSSR.L</b> Carbamidomethyl (C)                    |

Sample M13

4700 Reflector Spec #1 MC=>NR(2.00)[BP = 1100.5, 28668]

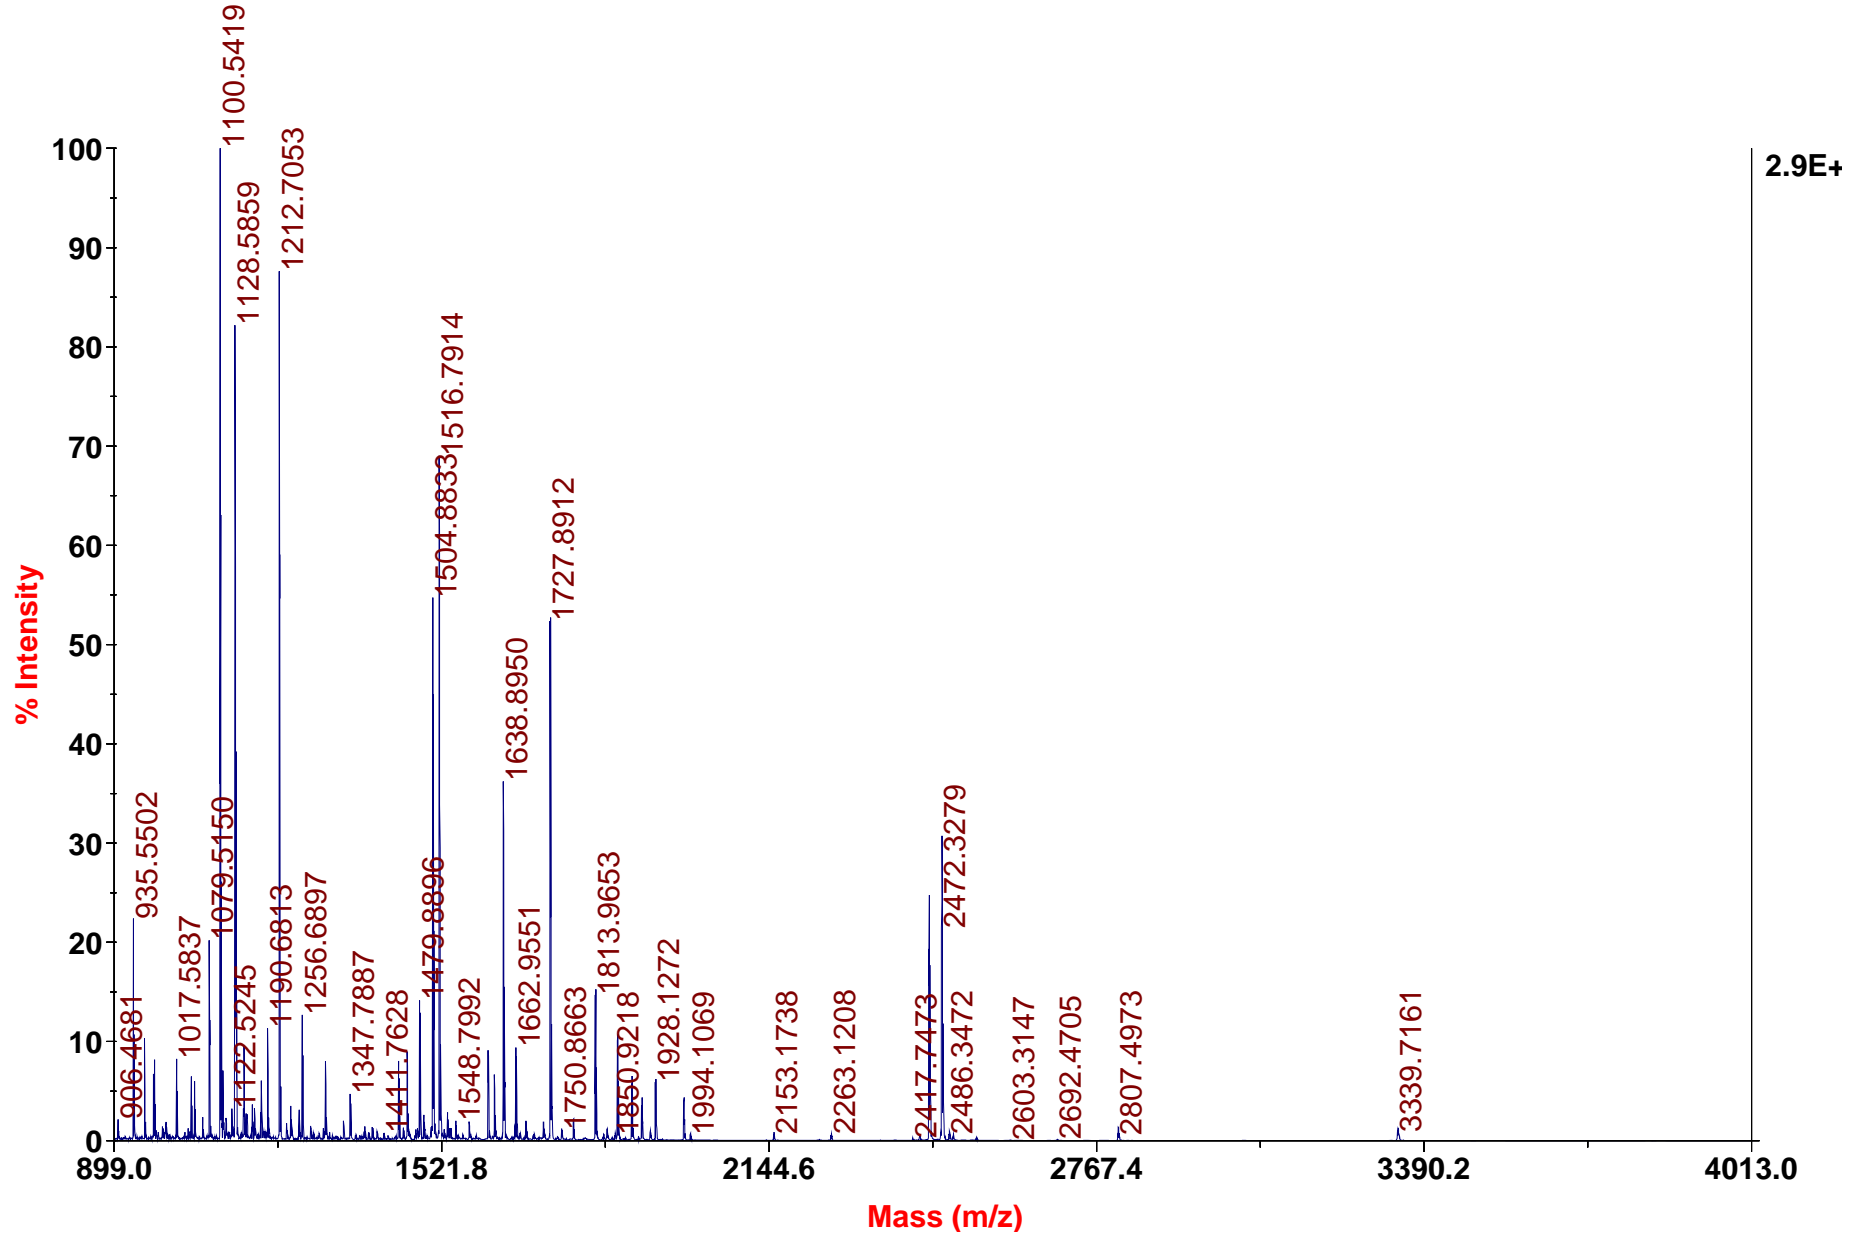

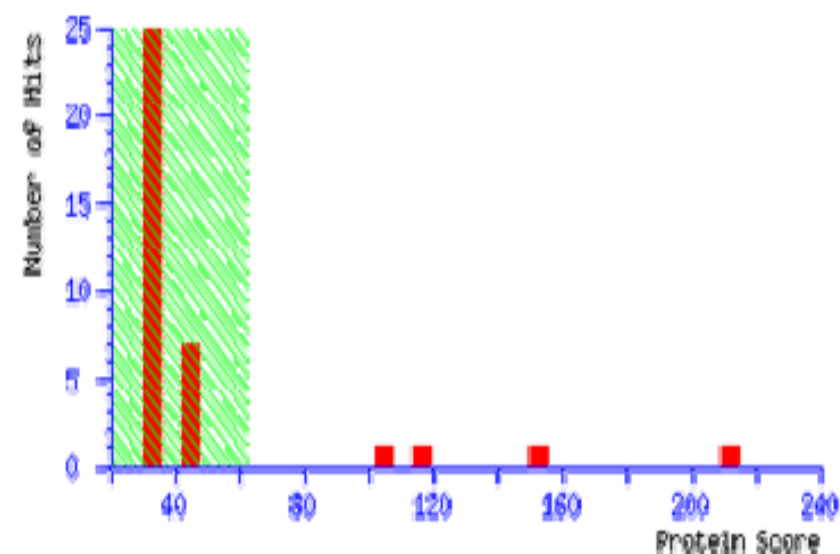

## Concise Protein Summary Report

Format As

Concise Protein Summary

[Help](#)

Significance threshold  $p <$

Max. number of hits

1. **Mixture 1** Total score: **212** Expect:  $5.8e-17$  Matches: 70

Components (only one family member shown for each component):

[Q3UKP2\\_MOUSE](#) Mass: 51285 Score: **152** Expect:  $5.8e-11$  Matches: 31

14 days embryo liver cDNA, RIKEN full-length enriched library, clone:I530016F13 product:hempoxin, full inse

[Q8C7C7\\_MOUSE](#) Mass: 64961 Score: **114** Expect:  $3.7e-07$  Matches: 46

2 days neonate thymus thymic cells cDNA, RIKEN full-length enriched library, clone:C920028B14 product:albumi

## Protein View

Match to: Q3UKP2\_MOUSE Score: 152 Expect: 5.8e-11

4 days embryo liver cDNA, RIKEN full-length enriched library, clone:I530016F13 product:hempoxin, found in search of pmf\_M2\_129990849012.txt

Nominal mass ( $M_r$ ): 51285; Calculated pI value: 7.92

CBI BLAST search of [Q3UKP2\\_MOUSE](#) against nr

Unformatted [sequence string](#) for pasting into other applications

Taxonomy: [Mus musculus](#)

Links to retrieve other entries containing this sequence from NCBI Entrez:  
(no taxonomy information for this entry)

Variable modifications: Carbamidomethyl (C), Deamidated (NQ), Oxidation (M)

Enzymatic cleavage by Trypsin: cuts C-term side of KR unless next residue is P

Number of mass values searched: 126

Number of mass values matched: 31

Sequence Coverage: 63%

Matched peptides shown in **Bold Red**

```
1  MARTAVALNI  LVLLGLCWSL  AVASPLPTAN  GRVAEVENG  KPDSDVPEHC
51  LDTWSFDAAT  MDHNGTMLFF  KGEFVWRGHS  GTRELISARW KNPITSVDAA
101 FRGPDSVFLI  KEDKVVYPP  EKKENGYPKL  FQEEFPGIPY  PPDAAVECHR
151 GECQSEGVLF  FQGNRKWFD  FATRTQKERS  WSTVGNCTAA  LRWLERYYCF
201 QGNKFLRFNP  VTGEVPPRYP  LDARDYFVSC  PGRGHGRPRN  GTAAGNSTHP
251 MHSRCSPDPG  LTALLSDHRG  ATYAFTGSHY  WRLDSSRDGW  HSWPIAHHWP
301 QGPSTVDAAF  SWDDKVYLIQ  GTQVYVFLTK  GGNNLVSGYP  KRLEKELGSP
351 PGISLETIDA  AFSCPGSSRL  YVSSGRRLWW  LDLKSGAQAT  WTEVSWPHEK
401 VDGALCLDKS  LGPNTCSSNG  SSLYFIHGPN  LYCYSSIDKL  NAAKSLPQPQ
451 KVNSILGCSQ
```

Show predicted peptides also

Sort Peptides By

Residue Number  Increasing Mass  Decreasing Mass

| Start | End | Observed  | Mr(expt)  | Mr(calc)  | ppm | Miss | Sequence          |
|-------|-----|-----------|-----------|-----------|-----|------|-------------------|
| 90    | 102 | 1504.8826 | 1503.8753 | 1503.7834 | 61  | 1    | R.WKNPITSVDAAFR.G |
| 92    | 102 | 1190.6791 | 1189.6718 | 1189.6091 | 53  | 0    | K.NPITSVDAAFR.G   |
| 103   | 111 | 975.5937  | 974.5864  | 974.5437  | 44  | 0    | R.GPDSVFLIK.E     |
| 103   | 114 | 1347.7883 | 1346.7810 | 1346.7082 | 54  | 1    | R.GPDSVFLIKEDK.V  |
| 112   | 122 | 1389.7819 | 1388.7746 | 1388.6976 | 55  | 1    | K.EDKVVYYPPEK.K   |
| 115   | 122 | 1017.5838 | 1016.5765 | 1016.5331 | 43  | 0    | K.VVYYPPEK.K      |
| 115   | 123 | 1145.6945 | 1144.6872 | 1144.6281 | 52  | 1    | K.VVYYPPEKK.E     |

## Protein View

Match to: [Q8C7C7\\_MOUSE](#) Score: 114 Expect: 3.7e-07

2 days neonate thymus thymic cells cDNA, RIKEN full-length enriched library, clone:C92002

Found in search of pmf\_M2\_129990849012.txt

Nominal mass ( $M_r$ ): 64961; Calculated pI value: 5.49

NCBI BLAST search of [Q8C7C7\\_MOUSE](#) against nr

Unformatted [sequence string](#) for pasting into other applications

Taxonomy: [Mus musculus](#)

Links to retrieve other entries containing this sequence from NCBI Entrez:  
(no taxonomy information for this entry)

Variable modifications: Carbamidomethyl (C), Deamidated (NQ), Oxidation (M)

Cleavage by Trypsin: cuts C-term side of KR unless next residue is P

Number of mass values searched: 126

Number of mass values matched: 46

Sequence Coverage: 69%

Matched peptides shown in **Bold Red**

```
1  NRYNDLGEQH  FKGLVLIAFS  QYLQKCSYDE  HAKLVQEVTD  FAKTCVADES
51 AANCDKSLHT  LFGDKLCAIP  NLRENYGEA  DCCTKQEPER  NECFLQHKDD
101 NPSLPPFERP  EAEAMCTSFK  ENPTTFMGHY  LHEVARRHPY  FYAPELLYYA
151 EQYNEILTQC  CAEADKESCL  TPKLDGVKEK  ALVSSVRQRM  KCSSMQKFGE
201 RAFKAWAVAR  LSQTFPNADF  AEITKLATDL  TKVNKECCHG  DLLECADDRA
251 ELAKYMCENQ  ATISSKLQTC  CDKPLLKKAH  CLSEVEHDTM  PADLPAIAAD
301 FVEDQEVCKN  YAEAKDVFLG  TFLYEYSRRH  PDYSVSLLLR  LAKKYEATLE
351 KCCAEANPPA  CYGTVLAEFQ  PLVEEPKNLV  KTNCDLYEKL  GEYGFQNAIL
401 VRYTQKAPQV  STPTLVEAAR  NLGRVGTKCC  TLPEDQRLPC  VEDYLSAILN
451 RVCLLHEKTP  VSEHVTKCCS  GSLVERRPCF  SALTVDETYV  PKEFKAETFT
501 FHSDICTLPE  KEKQIKKQTA  LAELVKHKPK  ATAEQLKTVM  DDFAQFLDTC
551 CKAADKDTCF  STEGPNLVTR  CKDALA
```

Show predicted peptides also

Sort Peptides By

Residue Number  Increasing Mass  Decreasing Mass

| Start | End | Observed  | Mr (expt) | Mr (calc) | ppm | Miss | Sequence                        |
|-------|-----|-----------|-----------|-----------|-----|------|---------------------------------|
| 1     | 12  | 1520.8362 | 1519.8289 | 1519.7168 | 74  | 1    | <b>-.NRYNDLGEQHFK.G</b>         |
| 13    | 25  | 1479.8887 | 1478.8814 | 1478.8497 | 21  | 0    | <b>K.GLVLIAFSQYLQK.C</b>        |
| 13    | 33  | 2415.3196 | 2414.3123 | 2414.1828 | 54  | 1    | <b>K.GLVLIAFSQYLQKCSYDEHAK</b>  |
| 13    | 33  | 2470.3232 | 2469.3159 | 2469.2362 | 32  | 1    | <b>K.GLVLIAFSQYLQKCSYDEHAK</b>  |
| 13    | 33  | 2472.3269 | 2471.3196 | 2471.2042 | 47  | 1    | <b>K.GLVLIAFSQYLQKCSYDEHAK</b>  |
| 34    | 43  | 1149.6681 | 1148.6608 | 1148.6077 | 46  | 0    | <b>K.LVQEVTDFAK.T</b>           |
| 34    | 56  | 2457.3489 | 2456.3416 | 2456.1199 | 90  | 1    | <b>K.LVQEVTDFAKTCVADESAANCI</b> |
| 57    | 65  | 1017.5838 | 1016.5765 | 1016.5291 | 47  | 0    | <b>K.SLHTLFGDK.L</b>            |



# M13

4700 MS/MS Precursor 1212.7 Spec #1 MC[BP = 352.2, 4991]

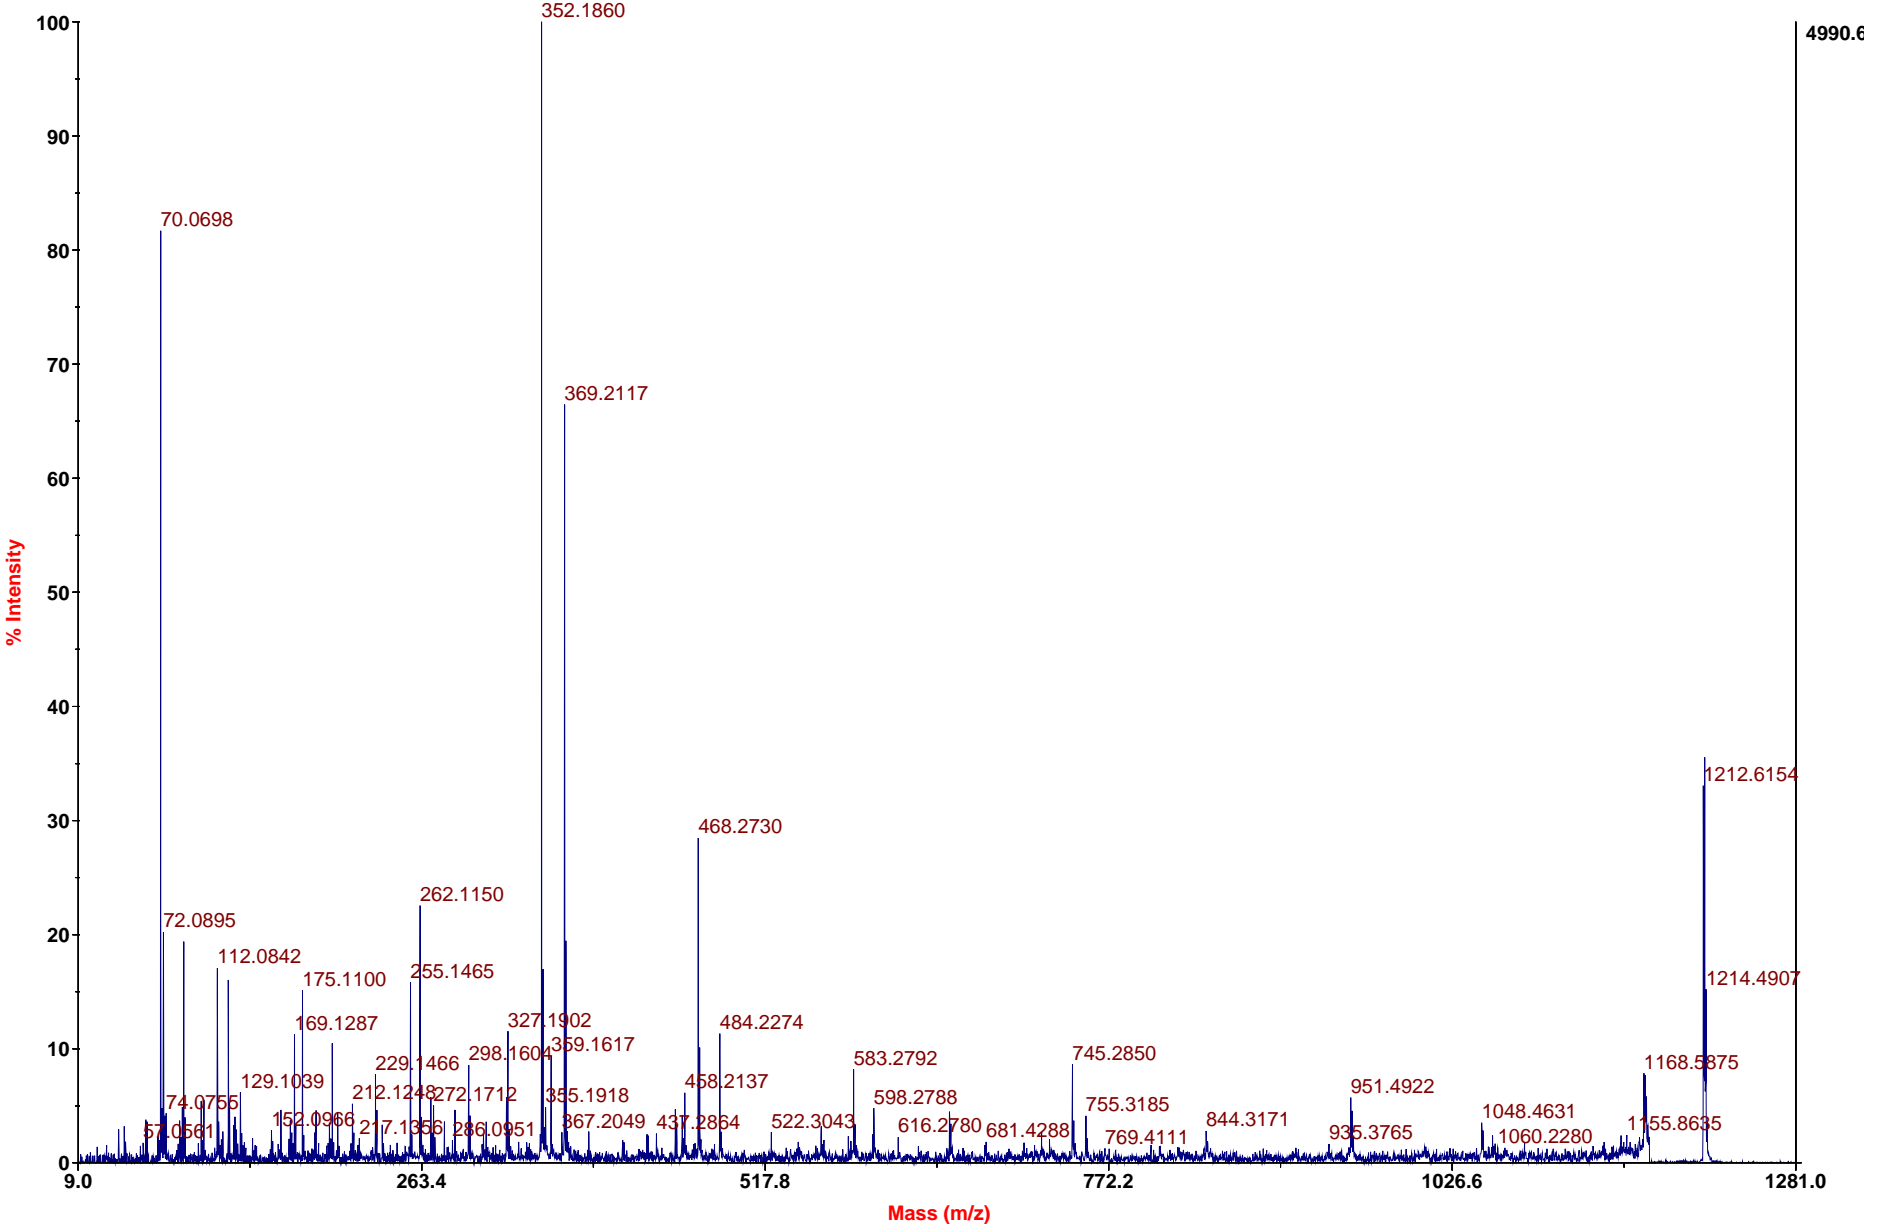

# M13

4700 MS/MS Precursor 1638.89 Spec #1 MC[BP = 312.2, 11579]

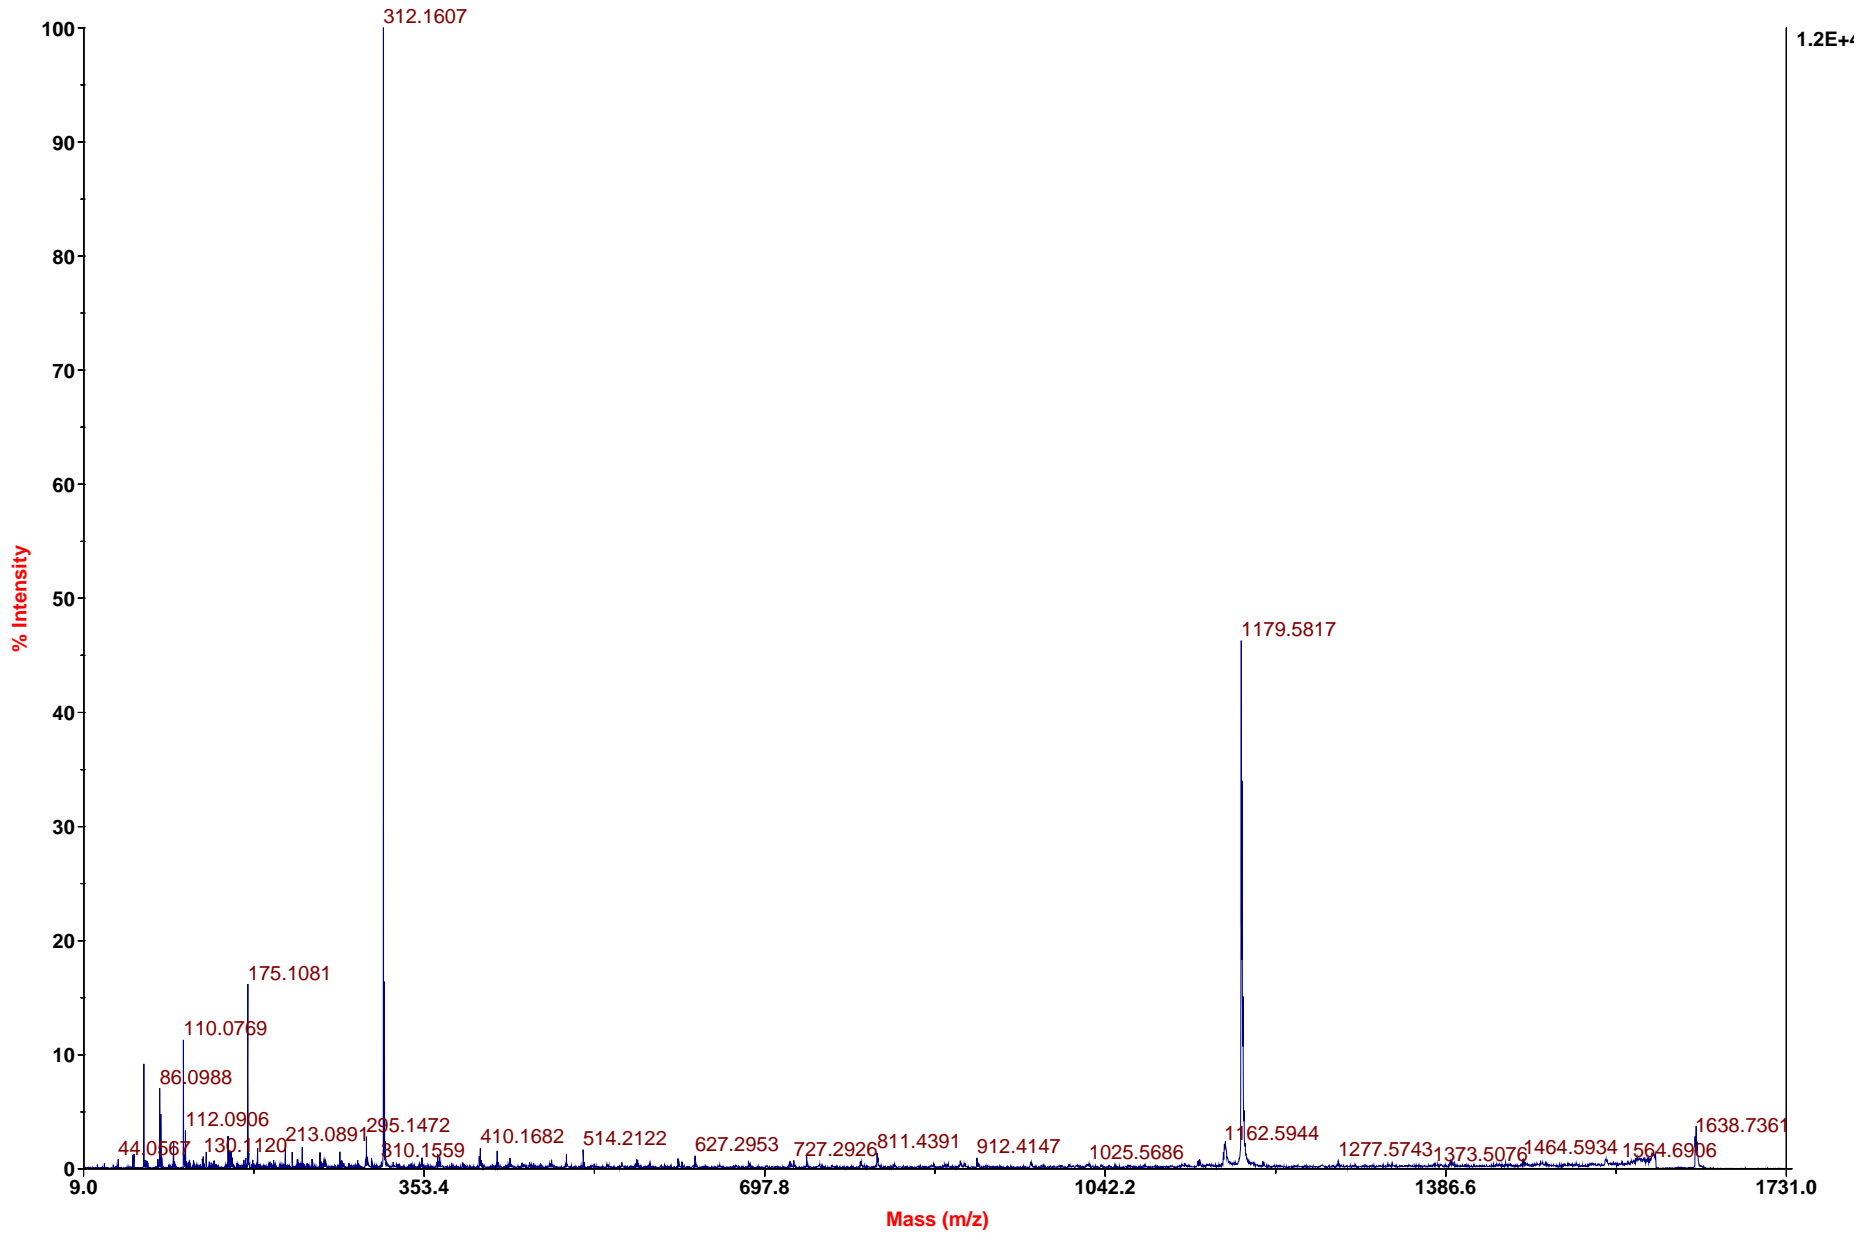



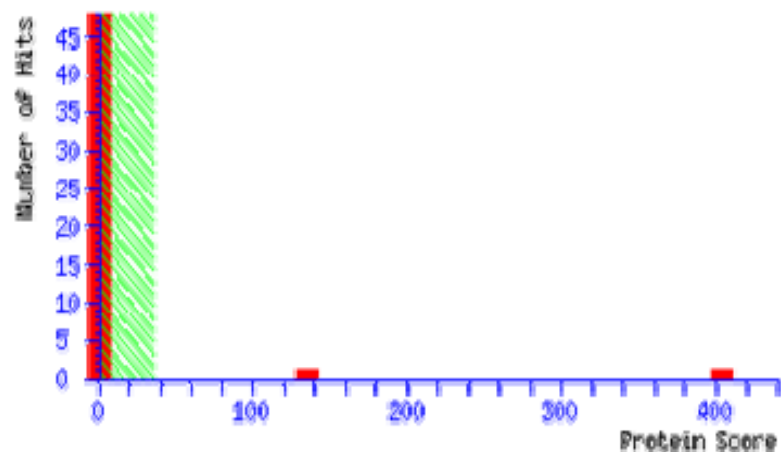

## Peptide Summary Report

Format As

Peptide Summary

[Help](#)

Significance threshold  $p <$

Max. number of hits

Standard scoring  MudPIT scoring  Ions score or expect cut-off

Show sub-sets

Show pop-ups  Suppress pop-ups  Sort unassigned

Require bold red

Select All

Select None

Search Selected

Error tolerant

1. [Q3UKP2 MOUSE](#) Mass: 51285 Score: 404 Matches: 15(9) Sequences: 15(9) emPAI: 2.80

14 days embryo liver cDNA, RIKEN full-length enriched library, clone:I530016F13 product:hempoxin, full insert s

Check to include this hit in error tolerant search

| Query                                                 | Observed  | Mr(expt)  | Mr(calc)  | ppm  | Miss | Score | Expect | Rank | Unique | Peptide                             |
|-------------------------------------------------------|-----------|-----------|-----------|------|------|-------|--------|------|--------|-------------------------------------|
| <input checked="" type="checkbox"/> <a href="#">2</a> | 1079.5145 | 1078.5072 | 1078.4542 | 49.2 | 0    | 49    | 0.0041 | 1    | U      | R.YYCFQGNK.F + Carbamidomethyl (C)  |
| <input checked="" type="checkbox"/> <a href="#">3</a> | 1100.5393 | 1099.5320 | 1099.4757 | 51.2 | 0    | 36    | 0.067  | 1    | U      | R.DYFVSCPGR.G + Carbamidomethyl (C) |
| <input checked="" type="checkbox"/> <a href="#">4</a> | 1128.5852 | 1127.5779 | 1127.5189 | 52.4 | 0    | 21    | 2.5    | 1    | U      | K.WFWDPATR.T                        |

## Protein View

Match to: Q3UKP2\_MOUSE Score: 404

14 days embryo liver cDNA, RIKEN full-length enriched library, clone:I530016F13 product:hempoxin, full insert sequence  
Found in search of ppw\_M2\_129990855812.txt

Nominal mass ( $M_r$ ): 51285; Calculated pI value: 7.92

NCBI BLAST search of [Q3UKP2\\_MOUSE](#) against nr

Unformatted [sequence string](#) for pasting into other applications

Taxonomy: [Mus musculus](#)

Links to retrieve other entries containing this sequence from NCBI Entrez:  
(no taxonomy information for this entry)

Variable modifications: Carbamidomethyl (C), Deamidated (NQ), Oxidation (M)

Cleavage by Trypsin: cuts C-term side of KR unless next residue is P

Sequence Coverage: 35%

Matched peptides shown in **Bold Red**

```
1  MARTAVALNI  LVLGLCWSL  AVASPLPTAN  GRVAEVNGT  KPDSDVPEHC
51  LDIWSFDAAT  MDHNGTMLFF  KGEFVWRGHS  GTRELISARW  KNPITSVDAA
101 FRGPDSVFLI  KEDKVWVYYP  EKKENGYPKL  FQEEFPGIPY  PPDAAVECHR
151 GECQSEGVLF  FQGNRKWFWD  FATRIQKERS  WSTVGNCTAA  LRWLERYYCF
201 QGNKFLRFNP  VTGEVPPRYP  LDARDYFVSC  PGRGHGRPRN  GTAHGNSHP
251 MHSRCSPDPG  LTALLSDHRG  ATYAFGSHY  WRLDSSRDGW  HSWPIAHHWP
301 QGPSTVDAAF  SWDDKVYLIQ  GTQVYVFLTK  GGNNLVSGYP  KRLEKELGSP
351 PGISLETIDA  AFSCPGSSRL  YVSSGRRLWW  LDLKSGAQAT  WTEVSWPHEK
401 VDGALCLDKS  LGPNTCSSNG  SSLYFIHGPN  LYCYSSIDKL  NAAKSLPQFQ
451 KVNSILGCSQ
```

Show predicted peptides also

Sort Peptides By

Residue Number  Increasing Mass  Decreasing Mass

| Start - End | Observed  | Mr(expt)  | Mr(calc)  | ppm | Miss | Sequence                                                                       |
|-------------|-----------|-----------|-----------|-----|------|--------------------------------------------------------------------------------|
| 90 - 102    | 1504.8826 | 1503.8753 | 1503.7834 | 61  | 1    | R.WKNPITSVDAAFR.G ( <a href="#">Ions score 69</a> )                            |
| 92 - 102    | 1190.6791 | 1189.6718 | 1189.6091 | 53  | 0    | K.NPITSVDAAFR.G ( <a href="#">Ions score 44</a> )                              |
| 115 - 123   | 1145.6945 | 1144.6872 | 1144.6281 | 52  | 1    | K.VWVYYPPEKK.E ( <a href="#">Ions score 6</a> )                                |
| 130 - 150   | 2472.3269 | 2471.3196 | 2471.1580 | 65  | 0    | K.LFQEEFPGIPYPPDAAVECHR.G Carbamidomethyl (C) ( <a href="#">Ions score 4</a> ) |
| 151 - 165   | 1727.8903 | 1726.8830 | 1726.7733 | 64  | 0    | R.GECQSEGVLFQGNR.K Carbamidomethyl (C) ( <a href="#">Ions score 19</a> )       |
| 151 - 166   | 1855.9941 | 1854.9868 | 1854.8683 | 64  | 1    | R.GECQSEGVLFQGNRK.W Carbamidomethyl (C) ( <a href="#">Ions score 19</a> )      |
| 166 - 174   | 1256.6886 | 1255.6813 | 1255.6138 | 54  | 1    | R.KWFDFATR.T ( <a href="#">Ions score 19</a> )                                 |
| 167 - 174   | 1128.5852 | 1127.5779 | 1127.5189 | 52  | 0    | K.WFDFATR.T ( <a href="#">Ions score 21</a> )                                  |
| 197 - 204   | 1079.5145 | 1078.5072 | 1078.4542 | 49  | 0    | R.YYCFQGNK.F Carbamidomethyl (C) ( <a href="#">Ions score 49</a> )             |
| 208 - 218   | 1212.7028 | 1211.6955 | 1211.6299 | 54  | 0    | R.FNPVTGEVPPR.Y ( <a href="#">Ions score 39</a> )                              |

# Sample M14

4700 Reflector Spec #1 MC=>NR(2.00)[BP = 1212.7, 12480]

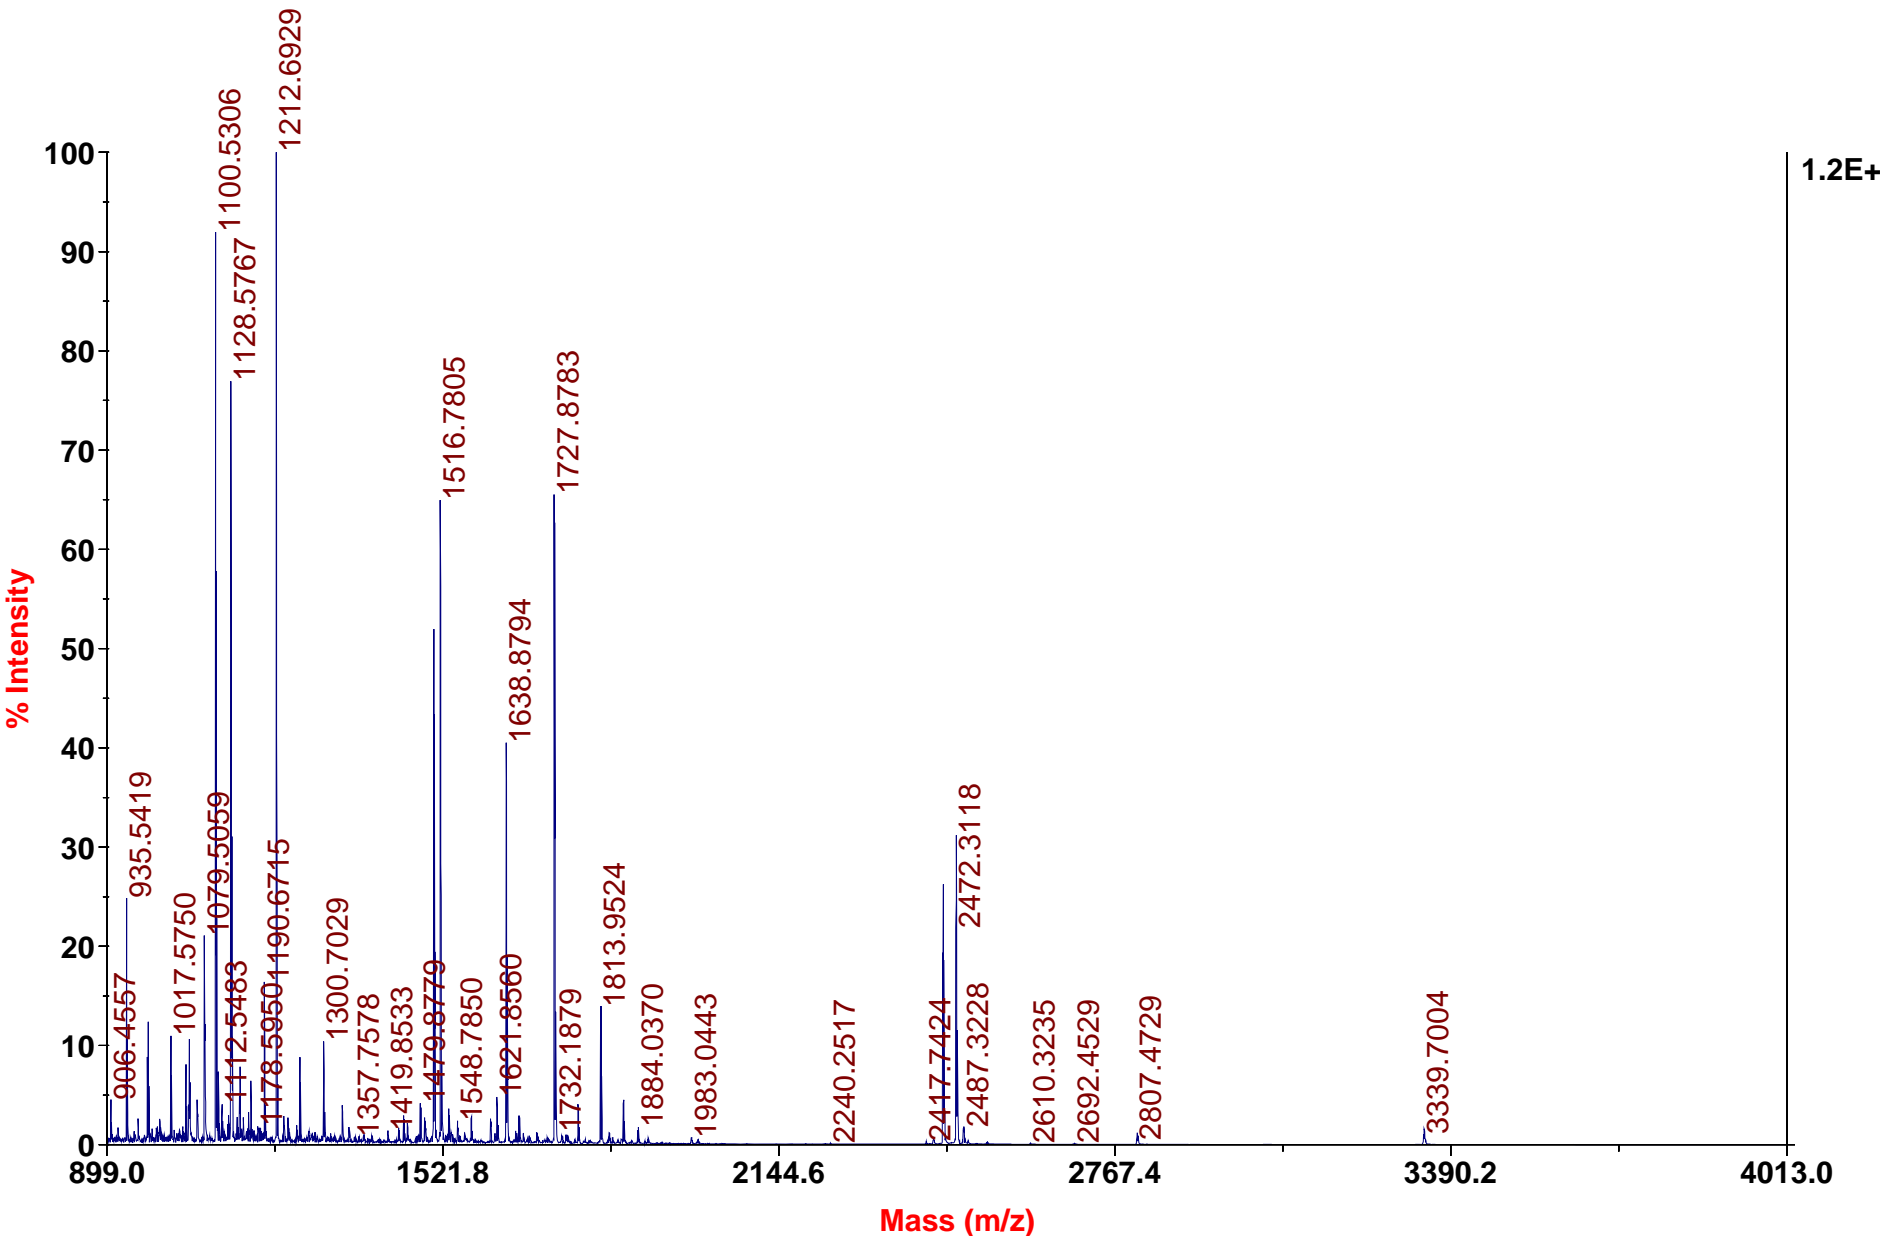

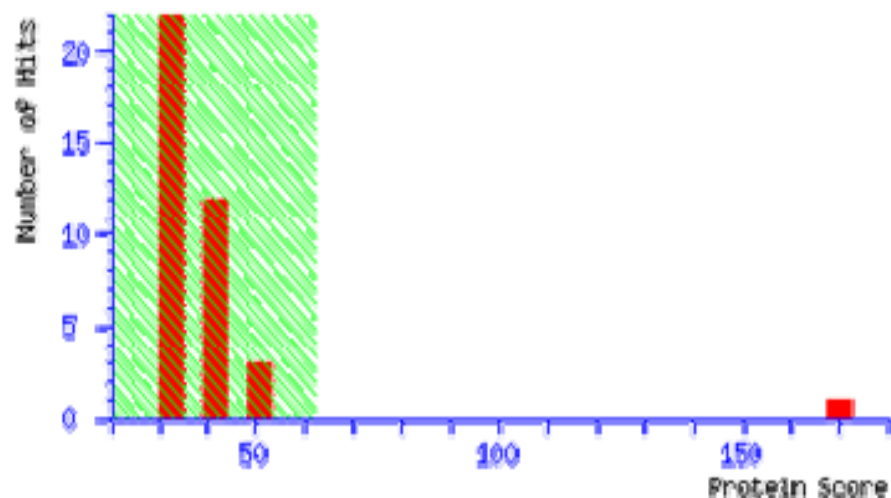

## Concise Protein Summary Report

Format As

Concise Protein Summary

[Help](#)

Significance threshold  $p <$

Max. number of hits

- [Q3UKP2\\_MOUSE](#) **Mass:** 51285 **Score:** 170 **Expect:** 9.2e-13 **Matches:** 25  
 14 days embryo liver cDNA, RIKEN full-length enriched library, clone:I530016F13 product:hempexin

[AAH11246](#) **Mass:** 51308 **Score:** 170 **Expect:** 9.2e-13 **Matches:** 25  
 BC011246 NID: - Mus musculus

[AAB49490](#) **Mass:** 50514 **Score:** 157 **Expect:** 1.8e-11 **Matches:** 24  
 MMU89889 NID: - Mus musculus

[Q8K1U6\\_MOUSE](#) **Mass:** 31027 **Score:** 110 **Expect:** 9.2e-07 **Matches:** 15  
 Hemopexin (Fragment).- Mus musculus (Mouse).

## Protein View

Match to: Q3UKP2\_MOUSE score: 170 Expect: 9.2e-13

14 days embryo liver cDNA, RIKEN full-length enriched library, clone:I530016F13 product:hempoxin, f  
Found in search of pmf\_N2\_129990849013.txt

Nominal mass ( $M_r$ ): 51285; Calculated pI value: 7.92

NCBI BLAST search of [Q3UKP2\\_MOUSE](#) against nr

Unformatted [sequence string](#) for pasting into other applications

Taxonomy: [Mus musculus](#)

Links to retrieve other entries containing this sequence from NCBI Entrez:  
(no taxonomy information for this entry)

Variable modifications: Carbamidomethyl (C), Deamidated (NQ), Oxidation (M)

Cleavage by Trypsin: cuts C-term side of KR unless next residue is P

Number of mass values searched: 108

Number of mass values matched: 25

Sequence Coverage: 51%

Matched peptides shown in **Bold Red**

```
1 MARTAVALNI LVLGLCWSL AVASPLPTAN GRVAEVNGT KPDSDVPEHC
51 LDTWSFDAAT MDHNGTMLFF KGEFVWRGHS GTRELISARW KNPITSVDAA
101 FRGPDSVFLI KEDKVWVYPP EKKENGYPKL FQEEFPGIPY PPDAAVECHR
151 GECQSEGVLF FQGNRKWFWF FATRTQKERS WSTVGNCTAA LRWLERYYCF
201 QGNKFLRFNP VTGEVPPRYP LDARDYFVSC PGRGHGRPRN GTAAGNSTHP
251 MHSRCSPPDG LTALLSDHRG ATYAFYTSY WRLDSSRDGW HSWPIAHHWP
301 QGPSTVDAAF SWDDKVYLIQ GTQVYVFLTK GGNNLVSGYP KRLEKELGSP
351 PGISLETIDA AFSCPGSSRL YVSSGRRLWW LDLKSGAQT WTEVSWPHEK
401 VDGALCLDKS LGPNTCSSNG SSLYFIHGPN LYCYSSIDKL NAAKSLPQPQ
451 KVNSILGCSQ
```

Show predicted peptides also

Sort Peptides By

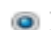

Residue Number

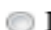

Increasing Mass

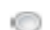

Decreasing Mass

| Start | End | Observed  | Mr (expt) | Mr (calc) | ppm | Miss | Sequence                           |
|-------|-----|-----------|-----------|-----------|-----|------|------------------------------------|
| 90    | 102 | 1504.8705 | 1503.8632 | 1503.7834 | 53  | 1    | R. WKNPITSVDAAFR.G                 |
| 92    | 102 | 1190.6692 | 1189.6619 | 1189.6091 | 44  | 0    | K. NPITSVDAAFR.G                   |
| 103   | 111 | 975.5863  | 974.5790  | 974.5437  | 36  | 0    | R. GPDSVFLIK.E                     |
| 103   | 114 | 1347.7714 | 1346.7641 | 1346.7082 | 42  | 1    | R. GPDSVFLIKEDK.V                  |
| 115   | 122 | 1017.5754 | 1016.5681 | 1016.5331 | 34  | 0    | K. VWVYPPEK.K                      |
| 115   | 123 | 1145.6865 | 1144.6792 | 1144.6281 | 45  | 1    | K. VWVYPPEKK.E                     |
| 130   | 150 | 2472.3081 | 2471.3008 | 2471.1580 | 58  | 0    | K. LFQEEFPGIPYPPDAAVECHR.G Carbami |
| 151   | 165 | 1670.8501 | 1669.8428 | 1669.7519 | 54  | 0    | R. GECQSEGVLFQGNR.K                |
| 151   | 165 | 1727.8776 | 1726.8703 | 1726.7733 | 56  | 0    | R. GECQSEGVLFQGNR.K Carbamidometh  |
| 151   | 166 | 1855.9836 | 1854.9763 | 1854.8683 | 58  | 1    | R. GECQSEGVLFQGNRK.W Carbamidomet  |
| 166   | 174 | 1256.6799 | 1255.6726 | 1255.6138 | 47  | 1    | R. KWFWDFATR.T                     |

# M14

4700 MS/MS Precursor 1638.88 Spec #1 MC[BP = 312.2, 3114]

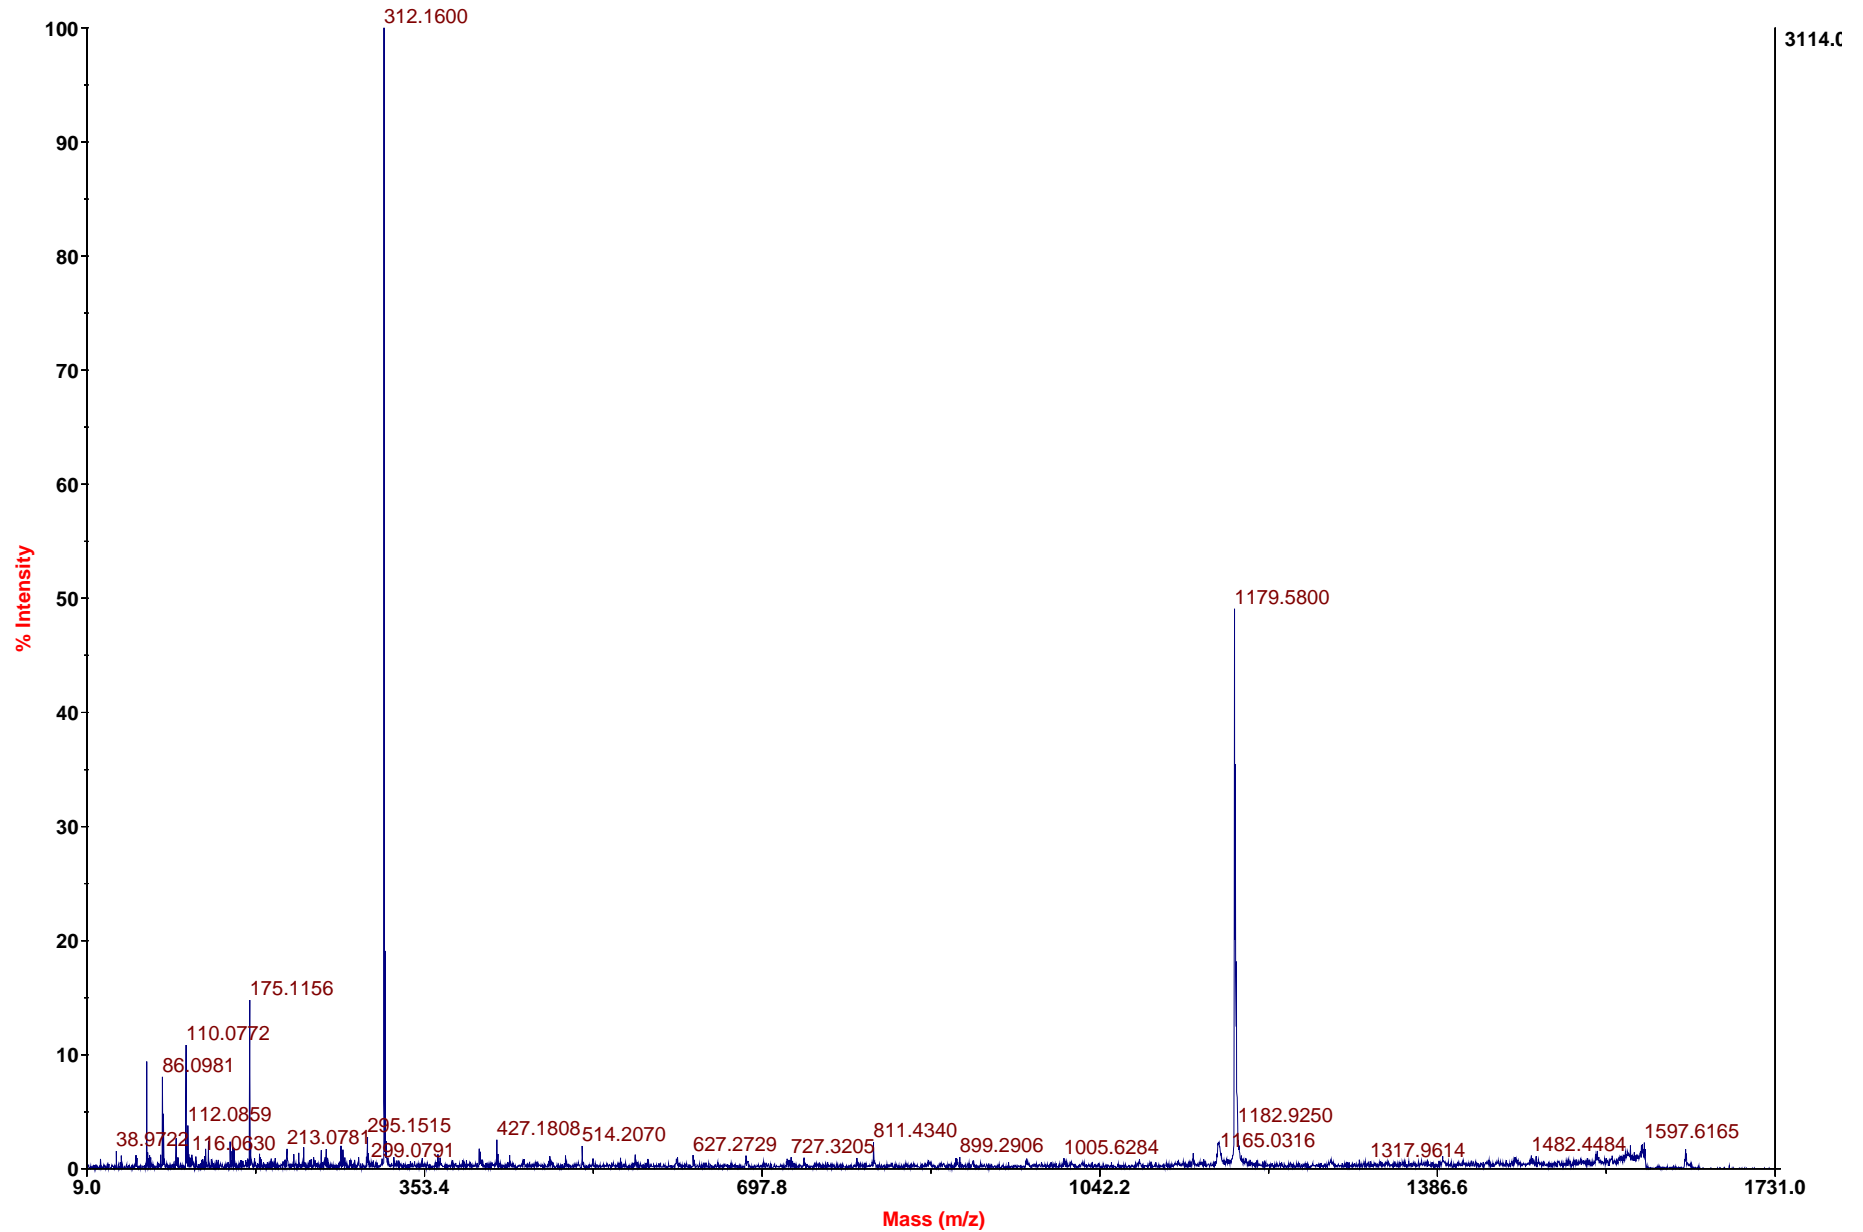

# M14

4700 MS/MS Precursor 1051.75 Spec #1 MC[BP = 861.0, 1795]

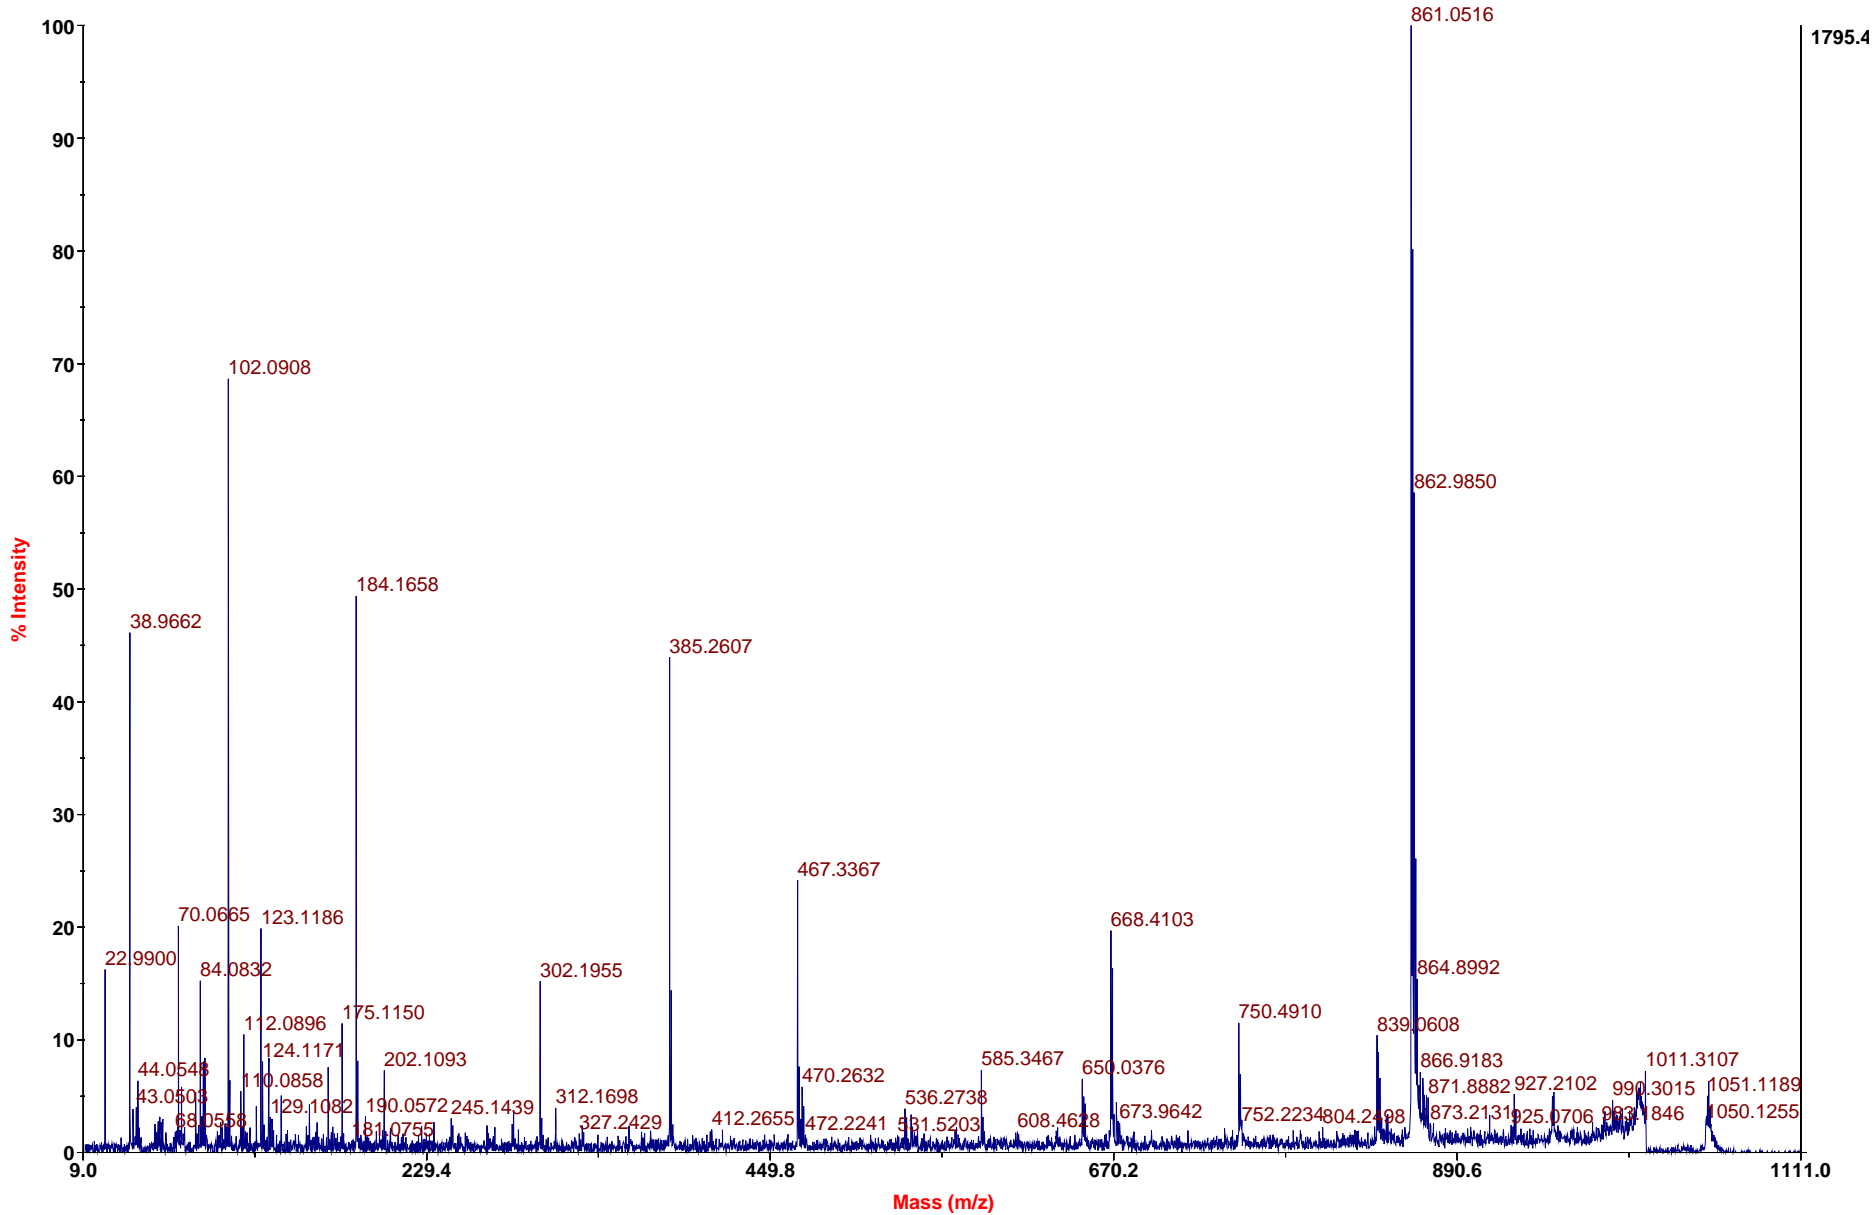



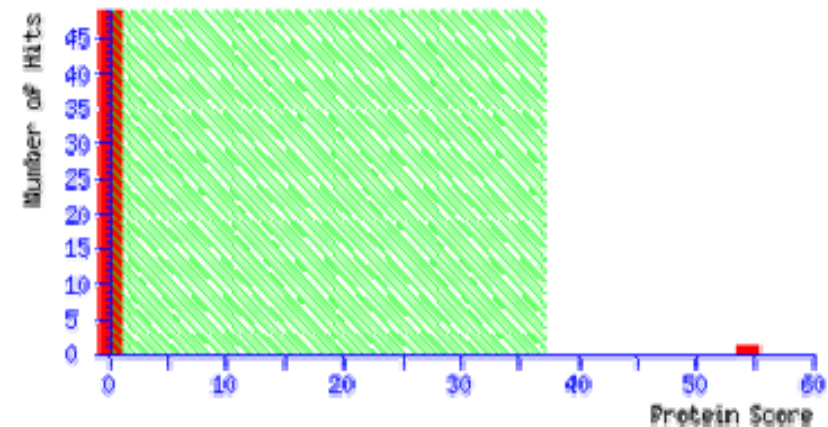

## Peptide Summary Report

Format As Peptide Summary

[Help](#)

Significance threshold  $p <$

Max. number of hits

Standard scoring  MudPIT scoring  Ions score or expect cut-off

Show sub-sets

Show pop-ups  Suppress pop-ups  Sort unassigned

Require bold red

Select All

Select None

Search Selected

Error tolerant

1. [Q3UKP2\\_MOUSE](#) Mass: 51285 Score: 55 Matches: 15(1) Sequences: 15(1) emPAI: 0.56

14 days embryo liver cDNA, RIKEN full-length enriched library, clone:I530016F13 product:hempoxin, full inser

Check to include this hit in error tolerant search

| Query                                                 | Observed  | Mr(expt)  | Mr(calc)  | ppm  | Miss | Score | Expect  | Rank | Unique | Peptide                         |
|-------------------------------------------------------|-----------|-----------|-----------|------|------|-------|---------|------|--------|---------------------------------|
| <input checked="" type="checkbox"/> <a href="#">2</a> | 975.5863  | 974.5790  | 974.5437  | 36.3 | 0    | 34    | 0.095   | 1    | U      | R.GPDSVFLIK.E                   |
| <input checked="" type="checkbox"/> <a href="#">3</a> | 1017.5754 | 1016.5681 | 1016.5331 | 34.4 | 0    | 18    | 4.7     | 1    | U      | K.VWVYPPEK.K                    |
| <input checked="" type="checkbox"/> <a href="#">6</a> | 1079.5037 | 1078.4964 | 1078.4542 | 39.1 | 0    | 25    | 1       | 1    | U      | R.YYCFQGNK.F + Carbamidomethyl  |
| <input checked="" type="checkbox"/> <a href="#">7</a> | 1100.5300 | 1099.5227 | 1099.4757 | 42.8 | 0    | 27    | 0.59    | 1    | U      | R.DYFVSCPGR.G + Carbamidomethyl |
| <input checked="" type="checkbox"/> <a href="#">8</a> | 1128.5742 | 1127.5669 | 1127.5189 | 42.6 | 0    | 4     | 1.2e+02 | 1    | U      | K.WFDFATR.T                     |



## Protein View

Match to: Q3UKP2\_MOUSE score: 55

14 days embryo liver cDNA, RIKEN full-length enriched library, clone:I530016F13 product:hemopexin, full

Found in search of ppw\_N2\_129990855913.txt

Nominal mass ( $M_r$ ): 51285; Calculated pI value: 7.92

NCBI BLAST search of [Q3UKP2\\_MOUSE](#) against nr

Unformatted [sequence string](#) for pasting into other applications

Taxonomy: [Mus musculus](#)

Links to retrieve other entries containing this sequence from NCBI Entrez:

(no taxonomy information for this entry)

Variable modifications: Carbamidomethyl (C), Deamidated (NQ), Oxidation (M)

Cleavage by Trypsin: cuts C-term side of KR unless next residue is P

Sequence Coverage: 34%

Matched peptides shown in **Bold Red**

```
1  MARTAVALNI  LVLLGLCWSL  AVASPLPTAN  GRVAEVENGT  KPDSDVPEHC
51  LDTWSFDAAT  MDHNGTMLFF  KGEFVWRGHS  GTRELISARW  KNPITSVDAA
101 FRGPDSVFLI  KEDKVWVYPP  EKKENGYPKL  FQEEFPGIPY  PPDAAVECHR
151 GECQSEGVLF  FQGNRKWFD  FATRTQKERS  WSTVGNCTAA  LRWLERYYCF
201 QGNKFLRFNP  VTGEVPPRYP  LDARDYFVSC  PGRGHGRPRN  GTAHGNSTHP
251 MHSRCSPDPG  LTALLSDHRG  ATYAFTGSHY  WRLDSSRDGW  HSWPIAHHWP
301 QGPSTVDAAF  SWDDKVYLIQ  GTQVYVFLTK  GGNNLVSGYP  KRLEKELGSP
351 PGISLETIDA  AFSCPGSSRL  YVSSGRRLWW  LDLKSGAQAT  WTEVSWPHEK
401 VDGALCLDKS  LGPNTCSSNG  SSLYFIHGPN  LYCYSSIDKL  NAAKSLPQPQ
451 KVNSILGCSQ
```

# Sample M15

4700 Reflector Spec #1 MC=>NR(2.00)[BP = 1100.5, 15842]

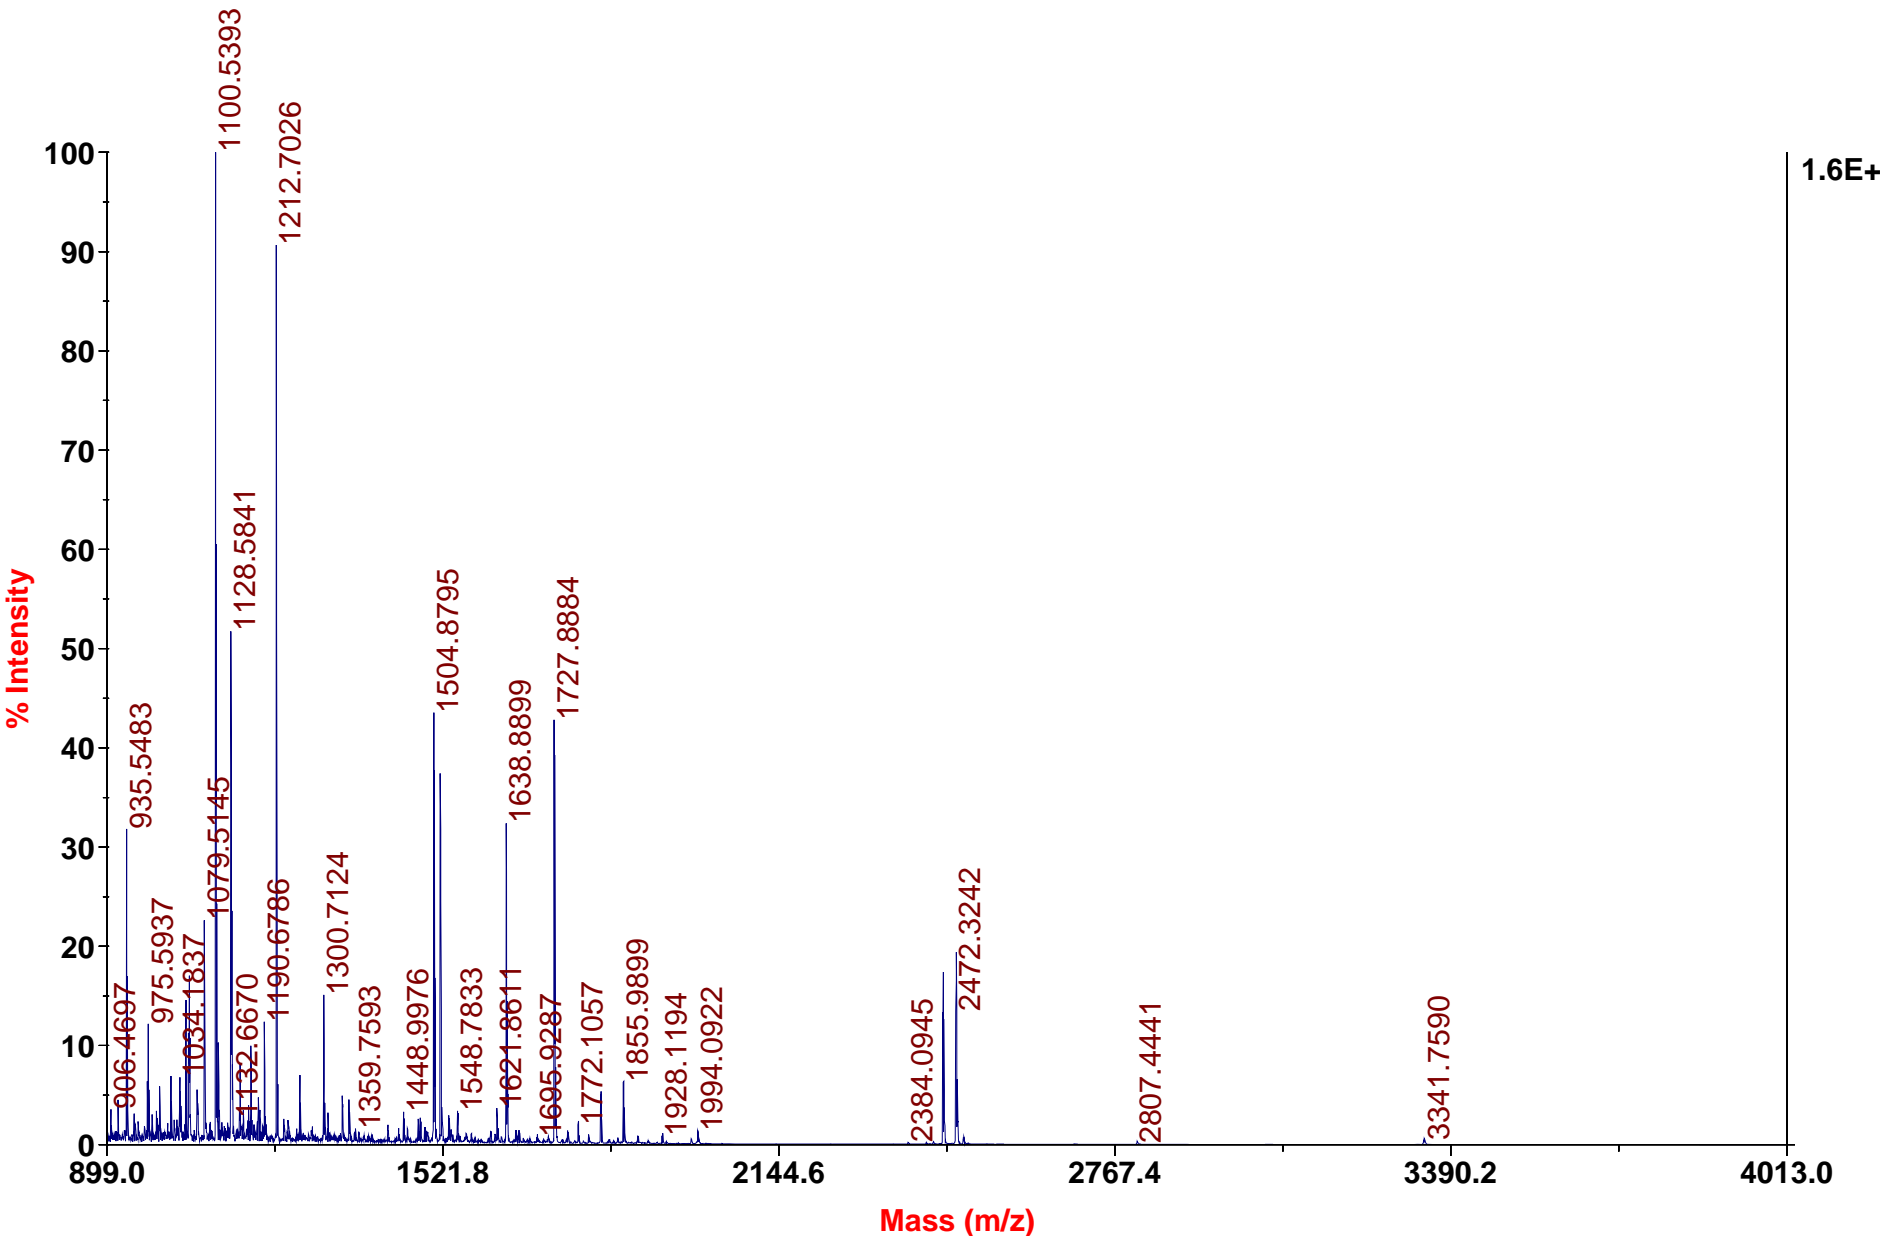

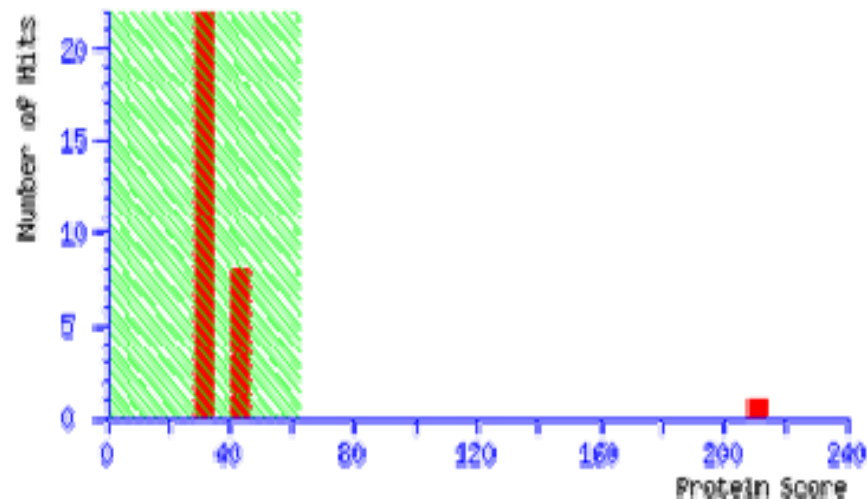

## Concise Protein Summary Report

Format As

Concise Protein Summary

[Help](#)

Significance threshold  $p <$

Max. number of hits

- [Q3UKP2\\_MOUSE](#) **Mass:** 51285 **Score:** 211 **Expect:** 7.3e-17 **Matches:** 29  
 14 days embryo liver cDNA, RIKEN full-length enriched library, clone:I530016F13 product:hempoxin, fu

[AAH11246](#) **Mass:** 51308 **Score:** 211 **Expect:** 7.3e-17 **Matches:** 29  
 BC011246 NID: - Mus musculus

[AAB49490](#) **Mass:** 50514 **Score:** 196 **Expect:** 2.3e-15 **Matches:** 27  
 MMU89889 NID: - Mus musculus

[Q8K1U6\\_MOUSE](#) **Mass:** 31027 **Score:** 134 **Expect:** 3.7e-09 **Matches:** 17  
 Hemopexin (Fragment).- Mus musculus (Mouse).

## Protein View

Match to: Q3UKP2\_MOUSE Score: 211 Expect: 7.3e-17

14 days embryo liver cDNA, RIKEN full-length enriched library, clone:I530016F13 product:hempoxin

Found in search of pmf\_o2\_129990849114.txt

Nominal mass ( $M_r$ ): 51285; Calculated pI value: 7.92

NCBI BLAST search of [Q3UKP2\\_MOUSE](#) against nr

Unformatted [sequence string](#) for pasting into other applications

Taxonomy: [Mus musculus](#)

Links to retrieve other entries containing this sequence from NCBI Entrez:  
(no taxonomy information for this entry)

Variable modifications: Carbamidomethyl (C), Deamidated (NQ), Oxidation (M)

Cleavage by Trypsin: cuts C-term side of KR unless next residue is P

Number of mass values searched: 111

Number of mass values matched: 29

Sequence Coverage: 58%

Matched peptides shown in **Bold Red**

```
1 MARIKAVLNIL LVLGLCWSL AVASPLPTAN GRVAEVNGT KPDSDVPEHC
51 LDTWSFDAAT MDHNGTMLFF KGEFVWRGHS GTRELISARW KNPITSVDAA
101 FRGPDVFLI KEDKVVYPP EKKENGYPKL FQEEFPGIPY PPDAAVECHR
151 GECQSEGVLF FQGNRKWFD FATRIQKERS WSTVGNCTAA LRWLERYYCF
201 QGNKFLRFNP VTGEVPPRY LDARDYFVSC PGRGHGRPRN GTAHGNSHP
251 MHSRCSPDPG LTALLSDHRG ATYAFTGSHY WRLDSSRDGW HSWPIAHHWP
301 QGPSTVDAAF SWDDKVYLIQ GTQVYVFLTK GGNNLVSGYP KRLEKELGSP
351 PGISLETIDA AFSCPGSSRL YVSSGRRLWW LDLKSGAQAT WTEVSWPHEK
401 VDGALCLDKS LGPNTCSSNG SSLYFIHGPN LYCYSSIDKL NAAKSLPQPQ
451 KVNSILGCSQ
```

Show predicted peptides also

Sort Peptides By

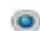

Residue Number

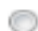

Increasing Mass

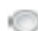

Decreasing Mass

| Start - End | Observed  | Mr(expt)  | Mr(calc)  | ppm | Miss | Sequence                         |
|-------------|-----------|-----------|-----------|-----|------|----------------------------------|
| 90 - 102    | 1504.8770 | 1503.8697 | 1503.7834 | 57  | 1    | <b>R.WKNPITSVDAAFR.G</b>         |
| 92 - 102    | 1190.6782 | 1189.6709 | 1189.6091 | 52  | 0    | <b>K.NPITSVDAAFR.G</b>           |
| 103 - 111   | 975.5938  | 974.5865  | 974.5437  | 44  | 0    | <b>R.GPDSVFLIK.E</b>             |
| 103 - 114   | 1347.7842 | 1346.7769 | 1346.7082 | 51  | 1    | <b>R.GPDSVFLIKEDK.V</b>          |
| 115 - 122   | 1017.5829 | 1016.5756 | 1016.5331 | 42  | 0    | <b>K.VWVYPPEK.K</b>              |
| 115 - 123   | 1145.6919 | 1144.6846 | 1144.6281 | 49  | 1    | <b>K.VWVYPPEKK.E</b>             |
| 130 - 150   | 2472.3220 | 2471.3147 | 2471.1580 | 63  | 0    | <b>K.LFQEEFPGIPYPPDAAVECHR.G</b> |

Carb

# M15

4700 MS/MS Precursor 1638.89 Spec #1 MC[BP = 312.1, 3207]

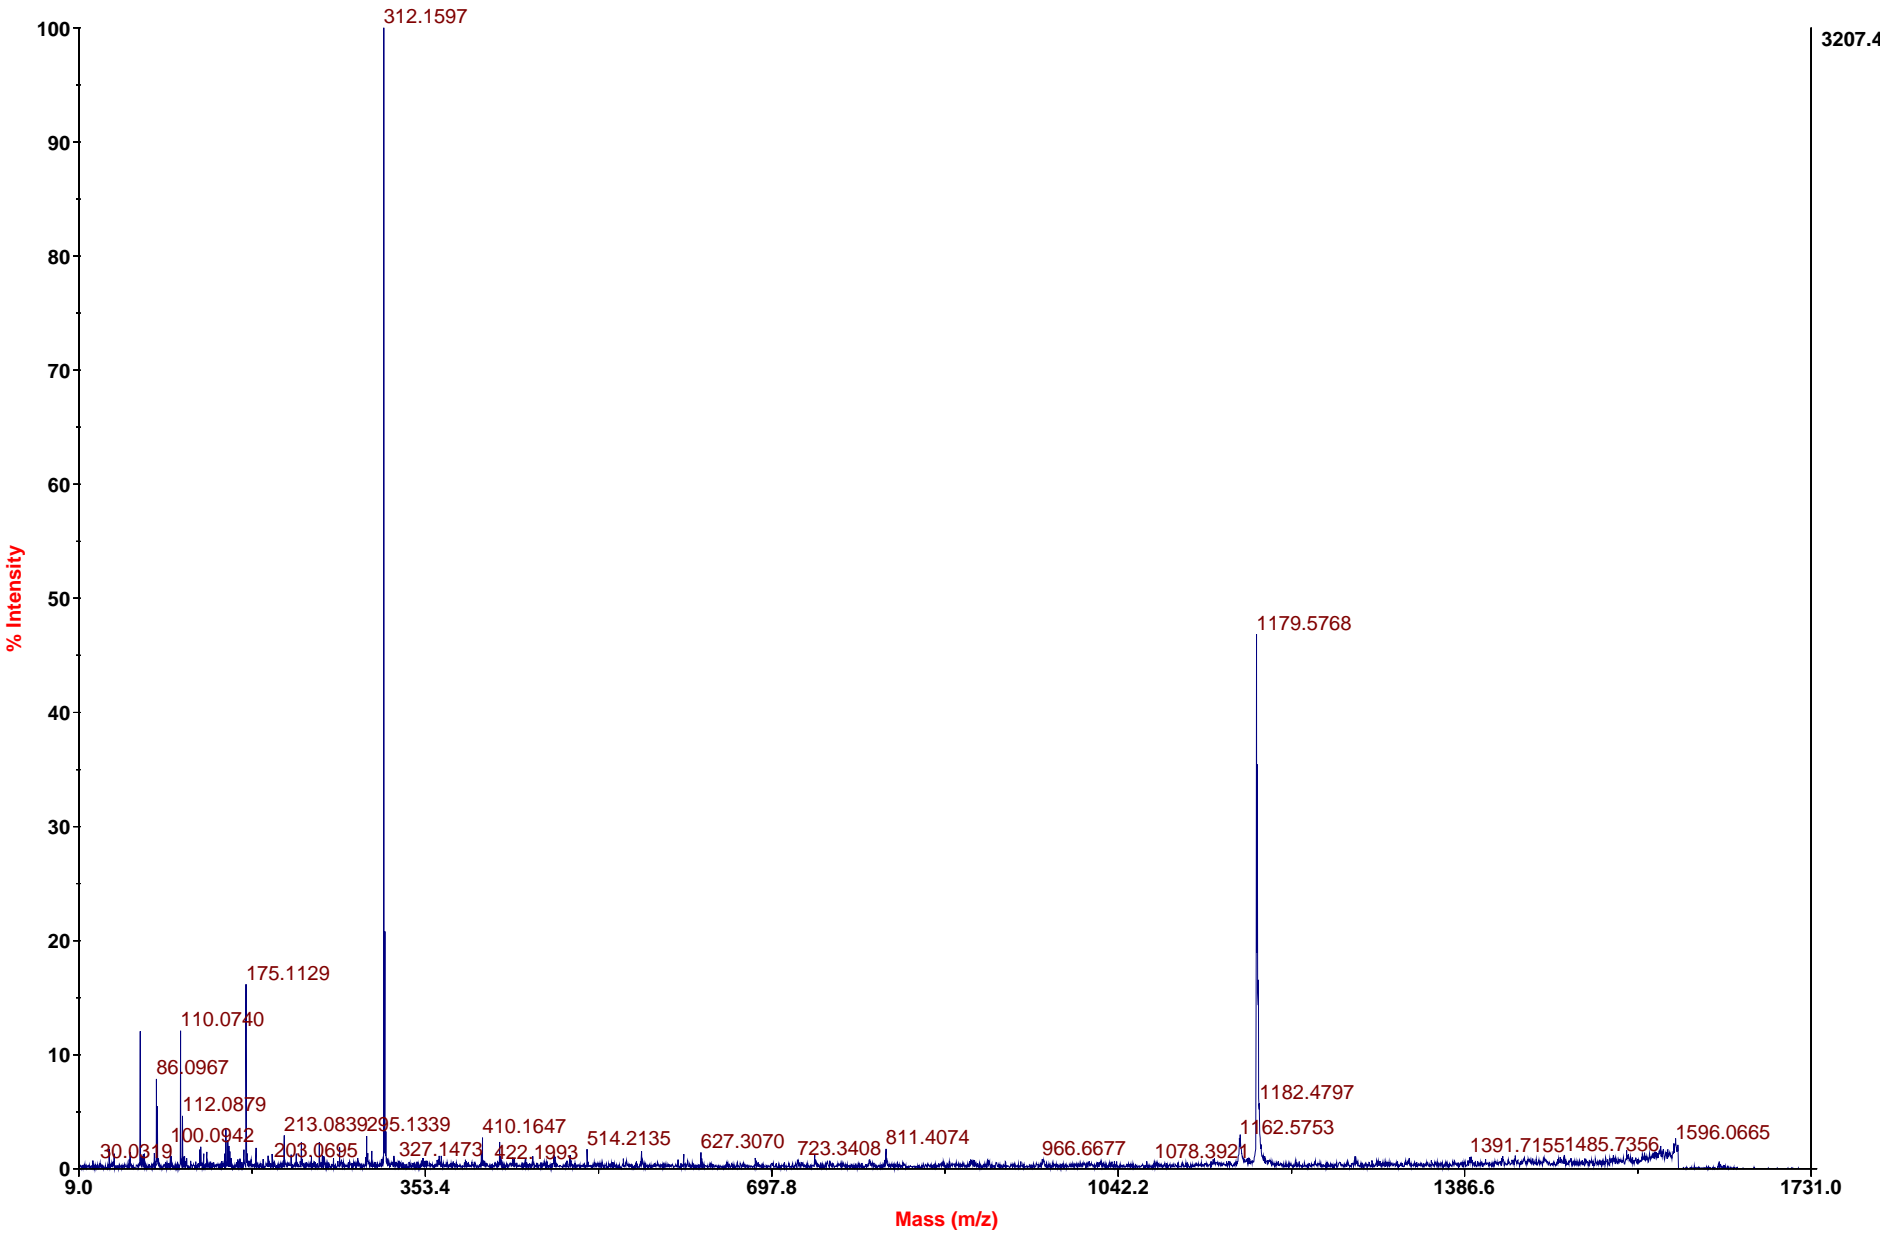

# M15

4700 MS/MS Precursor 1051.75 Spec #1 MC[BP = 861.0, 3680]

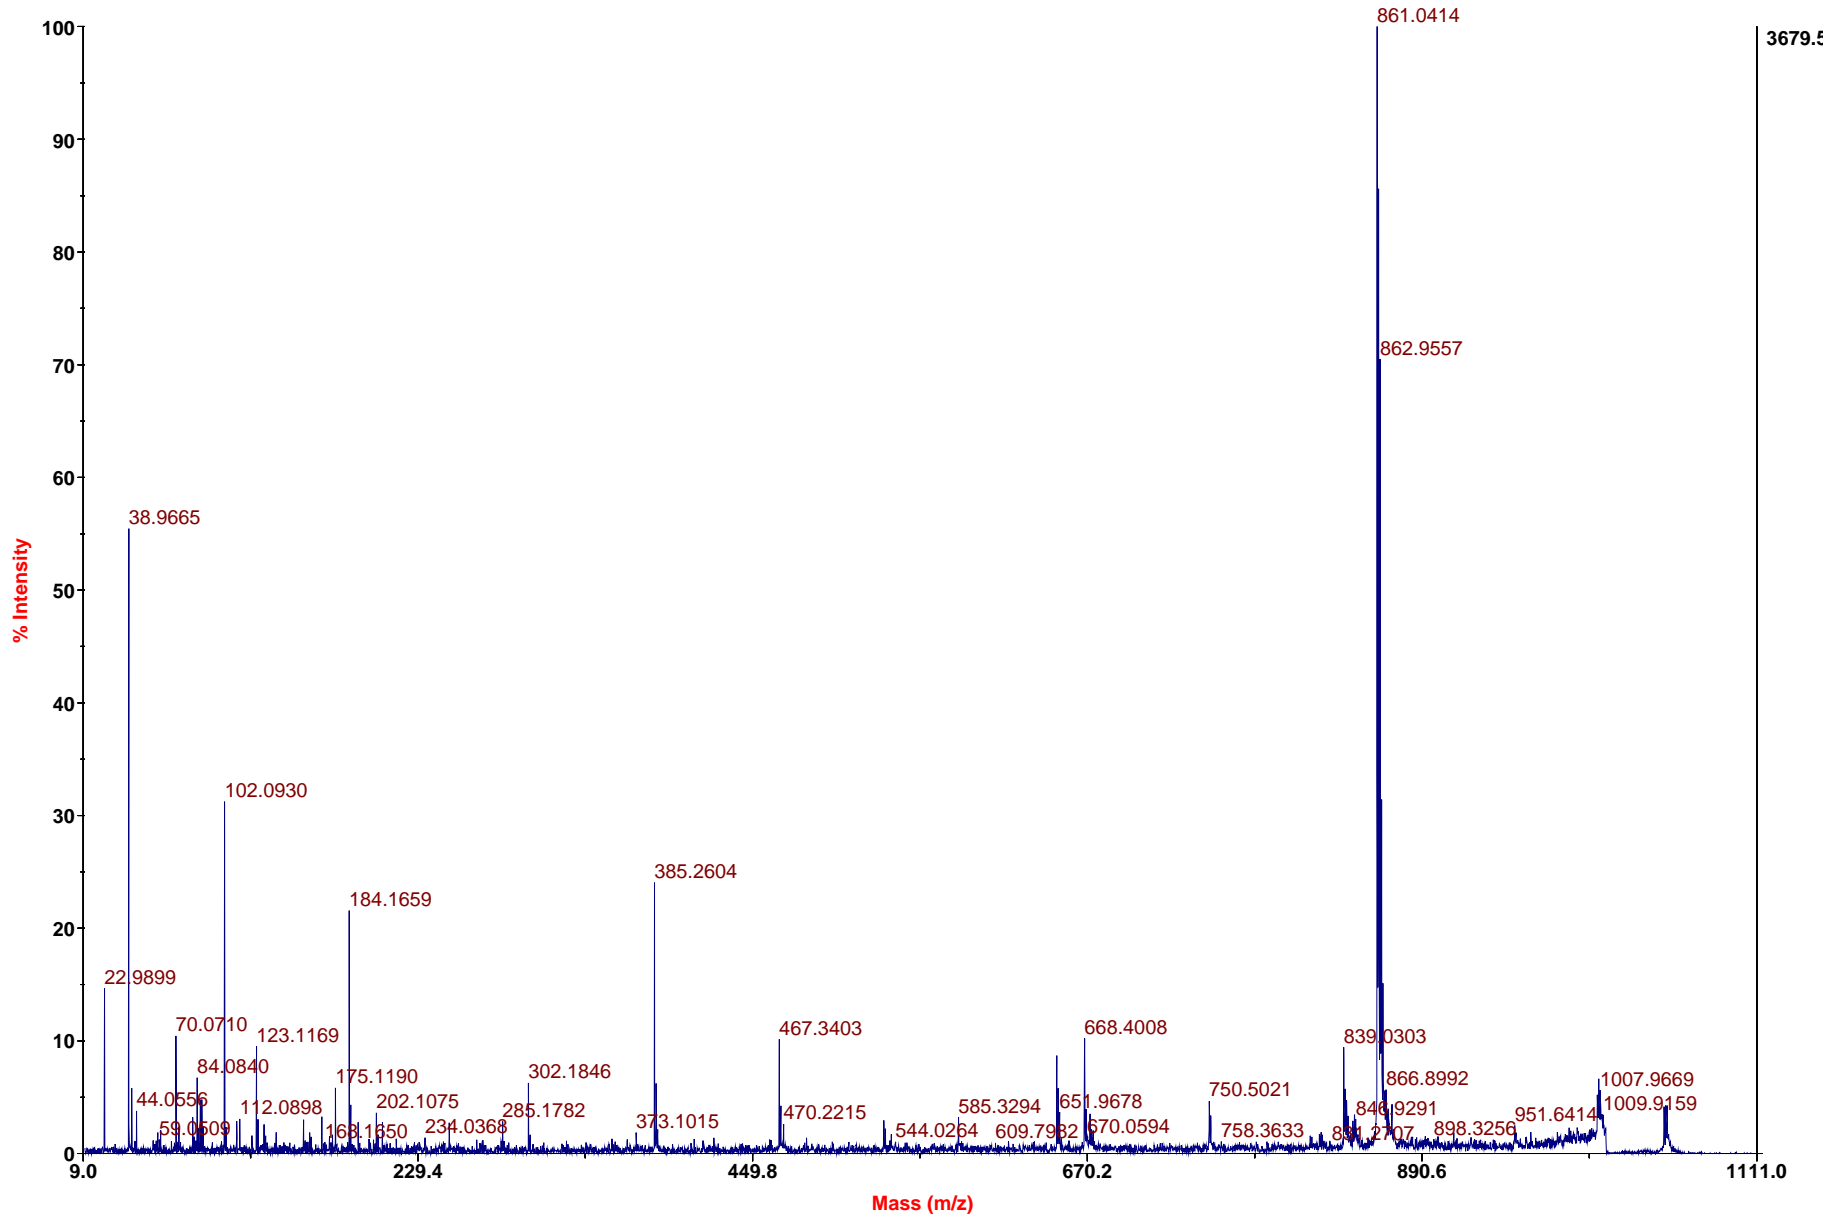

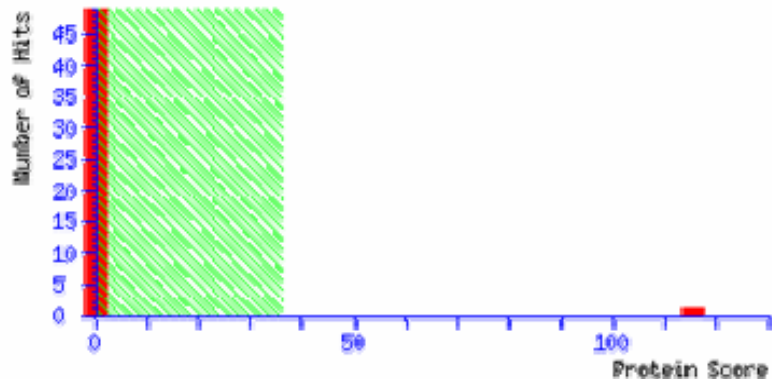

## Peptide Summary Report

Format As Peptide Summary

[Help](#)

Significance threshold  $p < 0.05$

Max. number of hits AUTO

Standard scoring  MudPIT scoring

Ions score or expect cut-off 0

Show sub-sets 0

Show pop-ups  Suppress pop-ups

Sort unassigned Decreasing Score

Require bold red

Select All

Select None

Search Selected

Error tolerant

1. [Q3UKP2\\_MOUSE](#) Mass: 51285 Score: 115 Matches: 14(3) Sequences: 14(3) emPAI: 0.95

14 days embryo liver cDNA, RIKEN full-length enriched library, clone:I530016F13 product:hempoxin, full insert seq

Check to include this hit in error tolerant search

| Query                                                  | Observed  | Mr(expt)  | Mr(calc)  | ppm  | Miss | Score | Expect  | Rank | Unique | Peptide                             |
|--------------------------------------------------------|-----------|-----------|-----------|------|------|-------|---------|------|--------|-------------------------------------|
| <a href="#">2</a>                                      | 975.5938  | 974.5865  | 974.5437  | 43.9 | 0    | 25    | 0.62    | 3    | U      | R.GPDSVFLIK.E                       |
| <a href="#">3</a>                                      | 1017.5829 | 1016.5756 | 1016.5331 | 41.8 | 0    | 14    | 13      | 3    | U      | K.VWVYPPEK.K                        |
| <input checked="" type="checkbox"/> <a href="#">6</a>  | 1079.5121 | 1078.5048 | 1078.4542 | 46.9 | 0    | 25    | 1.1     | 1    | U      | R.YYCFQGNK.F + Carbamidomethyl (C)  |
| <input checked="" type="checkbox"/> <a href="#">7</a>  | 1100.5388 | 1099.5315 | 1099.4757 | 50.8 | 0    | 22    | 1.8     | 1    | U      | R.DYFVSCPGR.G + Carbamidomethyl (C) |
| <input checked="" type="checkbox"/> <a href="#">8</a>  | 1128.5817 | 1127.5744 | 1127.5189 | 49.3 | 0    | 4     | 1.3e+02 | 1    | U      | K.WFWDFAFR.T                        |
| <a href="#">9</a>                                      | 1145.6919 | 1144.6846 | 1144.6281 | 49.4 | 1    | 6     | 46      | 2    | U      | K.VWVYPPEKK.E                       |
| <input checked="" type="checkbox"/> <a href="#">11</a> | 1190.6782 | 1189.6709 | 1189.6091 | 51.9 | 0    | 31    | 0.22    | 1    | U      | K.NPITSVDAAFR.G                     |
| <input checked="" type="checkbox"/> <a href="#">12</a> | 1212.7021 | 1211.6948 | 1211.6299 | 53.6 | 0    | 35    | 0.052   | 1    | U      | R.FNPVTGEVPPR.Y                     |
| <input checked="" type="checkbox"/> <a href="#">14</a> | 1504.8770 | 1503.8697 | 1503.7834 | 57.4 | 1    | 12    | 11      | 1    | U      | R.WKNPITSVDAAFR.G                   |



## Protein View

Match to: [Q3UKP2\\_MOUSE](#) score: 115

14 days embryo liver cDNA, RIKEN full-length enriched library, clone:I530016F13 product:hempoxin, full

Found in search of ppw\_O2\_129990856114.txt

Nominal mass ( $M_r$ ): 51285; Calculated pI value: 7.92

NCBI BLAST search of [Q3UKP2\\_MOUSE](#) against nr

Unformatted [sequence string](#) for pasting into other applications

Taxonomy: [Mus musculus](#)

Links to retrieve other entries containing this sequence from NCBI Entrez:

(no taxonomy information for this entry)

Variable modifications: Carbamidomethyl (C), Deamidated (NQ), Oxidation (M)

Cleavage by Trypsin: cuts C-term side of KR unless next residue is P

Sequence Coverage: 33%

Matched peptides shown in **Bold Red**

```
1 MARTAVALNI LVLLGLCWSL AVASPLPTAN GRVAEVENGT KPDSDVPEHC
51 LDTWSFDAAT MDHNGTMLFF KGEFVWRGHS GTRELISARW KNPITSVDAA
101 FRGPDVFLI KEDKVWVYPP EKKENGYPKL FQEEFPGIPY PPDAAVECHR
151 GECQSEGVLF FQGNRKWFD FATRIQKERS WSTVGNCTAA LRWLERYYCF
201 QGNKFLRFNP VTGEVPPRYP LDARDYFVSC PGRGHGRPRN GTAHGNSTHP
251 MHSRCSPDPG LTALLSDHRG ATYAFTGSHY WRLDSSRDGW HSWPIAHHWP
301 QGPSTVDAAF SWDDKVYLIQ GTQVYVFLTK GGNNLVSGYP KRLEKELGSP
351 PGISLETIDA AFSCPGSSRL YVSSGRRLWW LDLKSGAQAT WTEVSWPHEK
401 VDGAICLDKS LGFNTICSSNG SSLYFIHGPN LYCYSSIDKL NAAKSLPQPQ
451 KVNSILGCSQ
```

Show predicted peptides also

Sort Peptides By

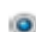

Residue Number

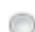

Increasing Mass

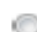

Decreasing Mass

| Start - End | Observed  | Mr(expt)  | Mr(calc)  | ppm | Miss | Sequence                                                   |
|-------------|-----------|-----------|-----------|-----|------|------------------------------------------------------------|
| 90 - 102    | 1504.8770 | 1503.8697 | 1503.7834 | 57  | 1    | <b>R.WKNPITSVDAAFR.G</b> ( <a href="#">Ions score 12</a> ) |
| 92 - 102    | 1190.6782 | 1189.6709 | 1189.6091 | 52  | 0    | <b>K.NPITSVDAAFR.G</b> ( <a href="#">Ions score 31</a> )   |
| 103 - 111   | 975.5938  | 974.5865  | 974.5437  | 44  | 0    | <b>R.GPDSVFLIK.E</b> ( <a href="#">Ions score 25</a> )     |
| 115 - 122   | 1017.5829 | 1016.5756 | 1016.5331 | 42  | 0    | <b>K.VWVYPPEK.K</b> ( <a href="#">Ions score 14</a> )      |
| 115 - 123   | 1145.6919 | 1144.6846 | 1144.6281 | 49  | 1    | <b>K.VWVYPPEKK.E</b> ( <a href="#">Ions score 6</a> )      |
| 130 - 150   | 2472.3220 | 2471.3147 | 2471.1580 | 63  | 0    | <b>K.LFQEEFPGIPYPPDAAVECHR.G</b> Carbamidomethyl           |
| 151 - 165   | 1727.8873 | 1726.8800 | 1726.7733 | 62  | 0    | <b>R.GECQSEGVLFQGNR.K</b> Carbamidomethyl                  |
| 167 - 174   | 1128.5817 | 1127.5744 | 1127.5189 | 49  | 0    | <b>K.WFWDFAFR.T</b> ( <a href="#">Ions score 4</a> )       |
| 197 - 204   | 1079.5121 | 1078.5048 | 1078.4542 | 47  | 0    | <b>R.YYCFQGNK.F</b> Carbamidomethyl (C) (I                 |



Sample M16

4700 Reflector Spec #1 MC=>NR(2.00)[BP = 1397.8, 35164]

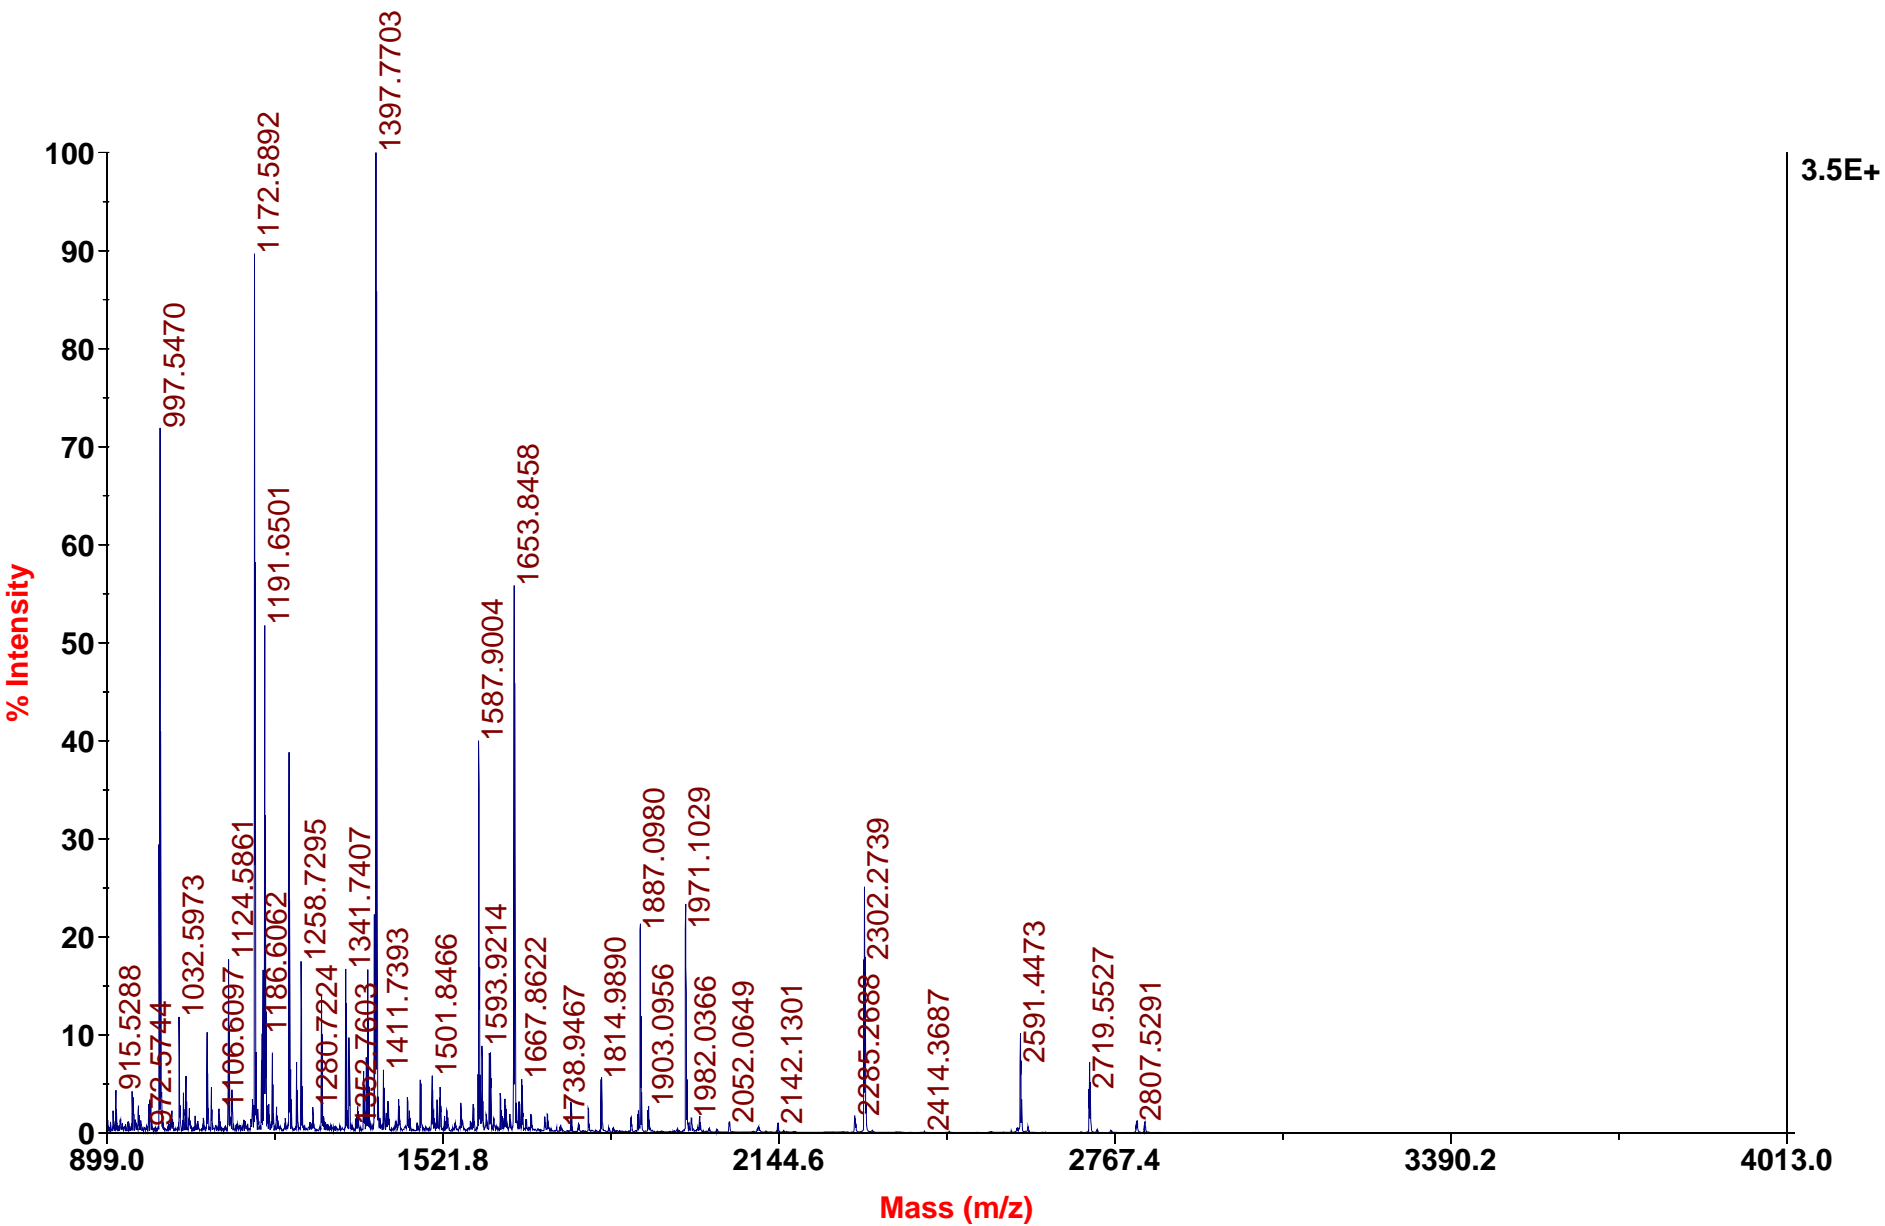

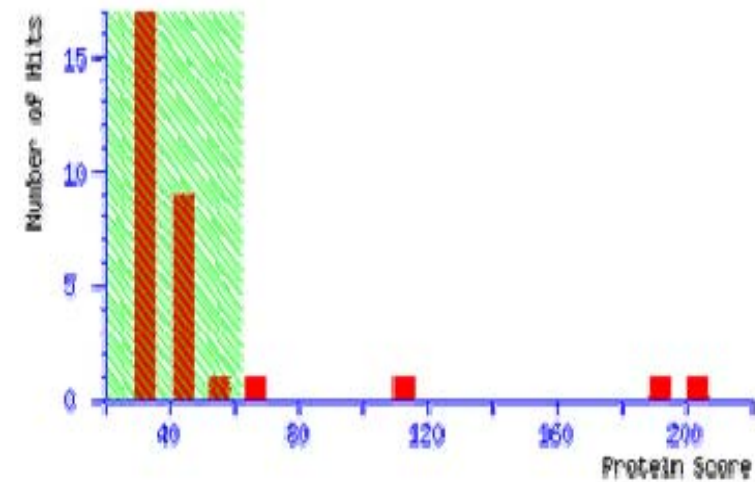

## Concise Protein Summary Report

Format As

Concise Protein Summary

[Help](#)

Significance threshold  $p <$

Max. number of hits

- [Q8C2F4](#) [MOUSE](#)    **Mass:** 56590    **Score:** 203    **Expect:** 4.6e-16    **Matches:** 45  
 2 days neonate thymus thymic cells cDNA, RIKEN full-length enriched library, clone:E430024F21 product:glucose regulated

[Q99LF6](#) [MOUSE](#)    **Mass:** 56643    **Score:** 203    **Expect:** 4.6e-16    **Matches:** 45  
 Protein disulfide isomerase associated 3.- Mus musculus (Mouse).

[Q3TEI9](#) [MOUSE](#)    **Mass:** 55393    **Score:** 190    **Expect:** 9.2e-15    **Matches:** 44  
 2 days neonate thymus thymic cells cDNA, RIKEN full-length enriched library, clone:E430002E15 product:glucose regulated

[Q3UZK8](#) [MOUSE](#)    **Mass:** 55446    **Score:** 190    **Expect:** 9.2e-15    **Matches:** 44  
 8 days embryo whole body cDNA, RIKEN full-length enriched library, clone:5730420K02 product:glucose regulated protein,

[AAA39944](#)    **Mass:** 56586    **Score:** 151    **Expect:** 7.3e-11    **Matches:** 42

## Protein View

Match to: Q8C2F4\_MOUSE score: 203 Expect: 4.6e-16

2 days neonate thymus thymic cells cDNA, RIKEN full-length enriched library, clone:E430024F21 product:glucose regulated pr

Found in search of pmf\_P2\_129990849115.txt

Nominal mass (M<sub>r</sub>): 56590; Calculated pI value: 5.78

NCBI BLAST search of [Q8C2F4\\_MOUSE](#) against nr

Unformatted [sequence string](#) for pasting into other applications

Taxonomy: [Mus musculus](#)

Links to retrieve other entries containing this sequence from NCBI Entrez:

(no taxonomy information for this entry)

Variable modifications: Carbamidomethyl (C), Deamidated (NQ), Oxidation (M)

Cleavage by Trypsin: cuts C-term side of KR unless next residue is P

Number of mass values searched: 170

Number of mass values matched: 45

Sequence Coverage: 69%

Matched peptides shown in **Bold Red**

```
1 MRFSC LALLP GVALLLASAC LAAASDVLEL TDENFESRVS DTGSAGLMLV
51 EFFAPWCGHC KRLAPEYEAA ATRLKGI VPL AKVDCTANTN TCNKYGVSGY
101 PTLKIFRDGE EAGAYDGPRT ADGIVSHLKK QAGPASVPLR TEEEFKKFIS
151 DKDASVVGFF RDLFSDGHSE FLKAASNLRD NYRFAHTNIE SLVKEYDDNG
201 EGITIFRPLH LANKFEDKTV AYTEKKMTSG KIKKFIQDSI FGLCPHMTED
251 NKDLIQGKDL LTAYYDV DYE KNAKGSNYWR NRVMVAKKF LDAGHKL NFA
301 VASRKTFSHE LSDFGLEST GEVPPVAIRT AKGEKFVMQE EFSRDGKALE
351 QFLQEYFDGN LKRYLKSEPI PESNEGPVKV VVAENFDDIV NEEDKDV LIE
401 FYAPWCGHCK NLEPKYKELG EKLSKDPNIV IAKMDATAND VPSPYEVKGF
451 PTIYFSPANK KLTPKKYEGG RELNDFISYL QREATNPPII QEEKPKKKKK
501 AQEDL
```

Show predicted peptides also

Sort Peptides By

Residue Number  Increasing Mass  Decreasing Mass

| Start - End | Observed  | Mr(expt)  | Mr(calc)  | ppm | Miss | Sequence                    |                             |
|-------------|-----------|-----------|-----------|-----|------|-----------------------------|-----------------------------|
| 39 - 61     | 2585.3071 | 2584.2998 | 2584.1549 | 56  | 0    | R.VSDTGSAGLMLVEFFAPWCGHCK.R | 2 Carbamidomethyl (C); Oxid |
| 62 - 73     | 1347.7603 | 1346.7530 | 1346.6942 | 44  | 1    | K.RLAPEYEAAAATR.L           |                             |
| 63 - 73     | 1191.6493 | 1190.6420 | 1190.5931 | 41  | 0    | R.LAPEYEAAAATR.L            |                             |
| 95 - 104    | 1084.6094 | 1083.6021 | 1083.5601 | 39  | 0    | K.YGVSGYPTLK.I              |                             |
| 95 - 107    | 1500.7830 | 1499.7757 | 1499.8136 | -25 | 1    | K.YGVSGYPTLKIFR.D           |                             |
| 105 - 119   | 1652.8489 | 1651.8416 | 1651.7590 | 50  | 1    | K.IFRDGE EAGAYDGPR.T        |                             |
| 108 - 119   | 1236.5663 | 1235.5590 | 1235.5054 | 43  | 0    | R.DGEEAGAYDGPR.T            |                             |
| 120 - 129   | 1040.6093 | 1039.6020 | 1039.5662 | 34  | 0    | R.TADGIVSHLK.K              |                             |
| 120 - 130   | 1168.7041 | 1167.6968 | 1167.6612 | 31  | 1    | R.TADGIVSHLKK.Q             |                             |
| 130 - 140   | 1123.6980 | 1122.6907 | 1122.6509 | 35  | 1    | K.QAGPASVPLR.T              |                             |

# M16

4700 MS/MS Precursor 1397.77 Spec #1 MC[BP = 86.1, 4255]

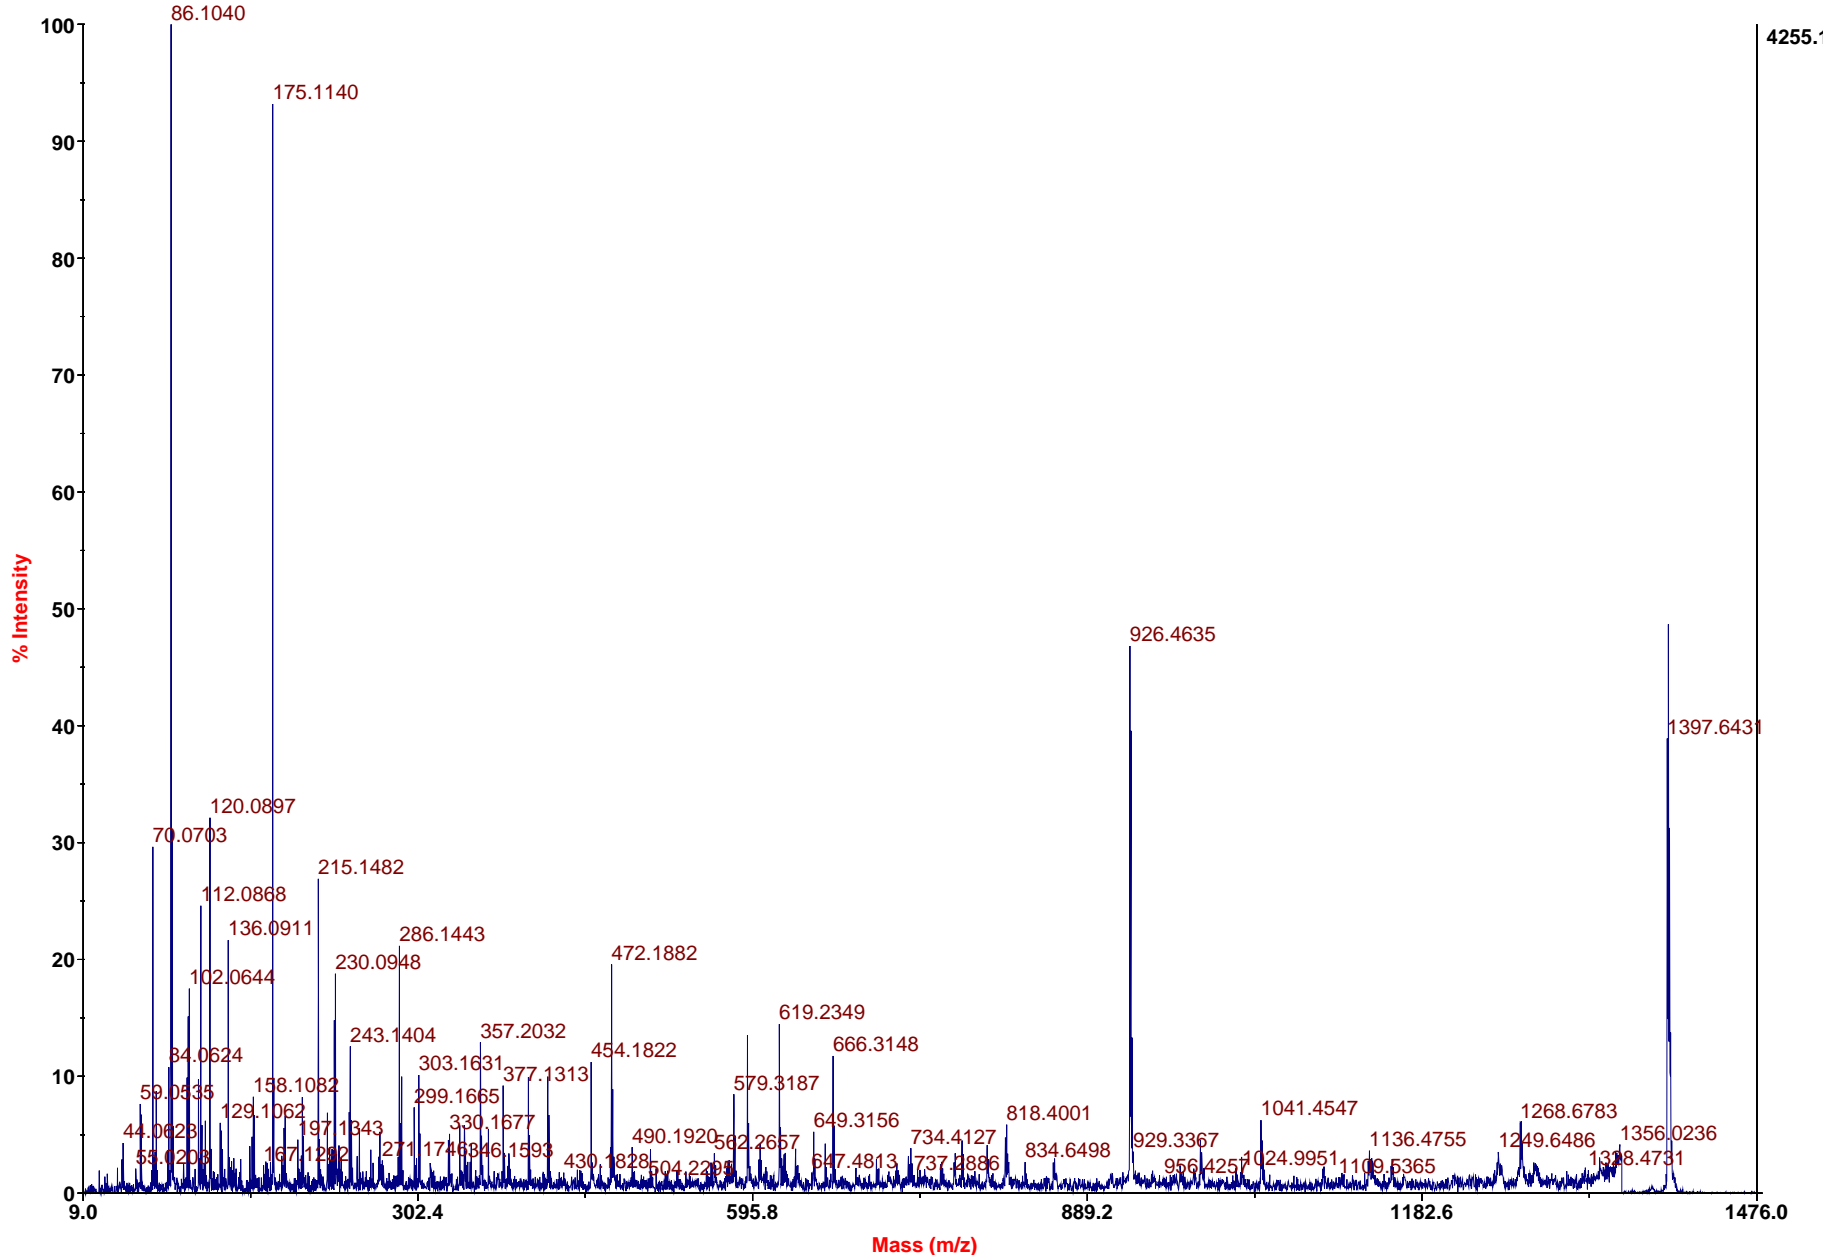

# M16

4700 MS/MS Precursor 1172.59 Spec #1 MC[BP = 120.1, 3468]

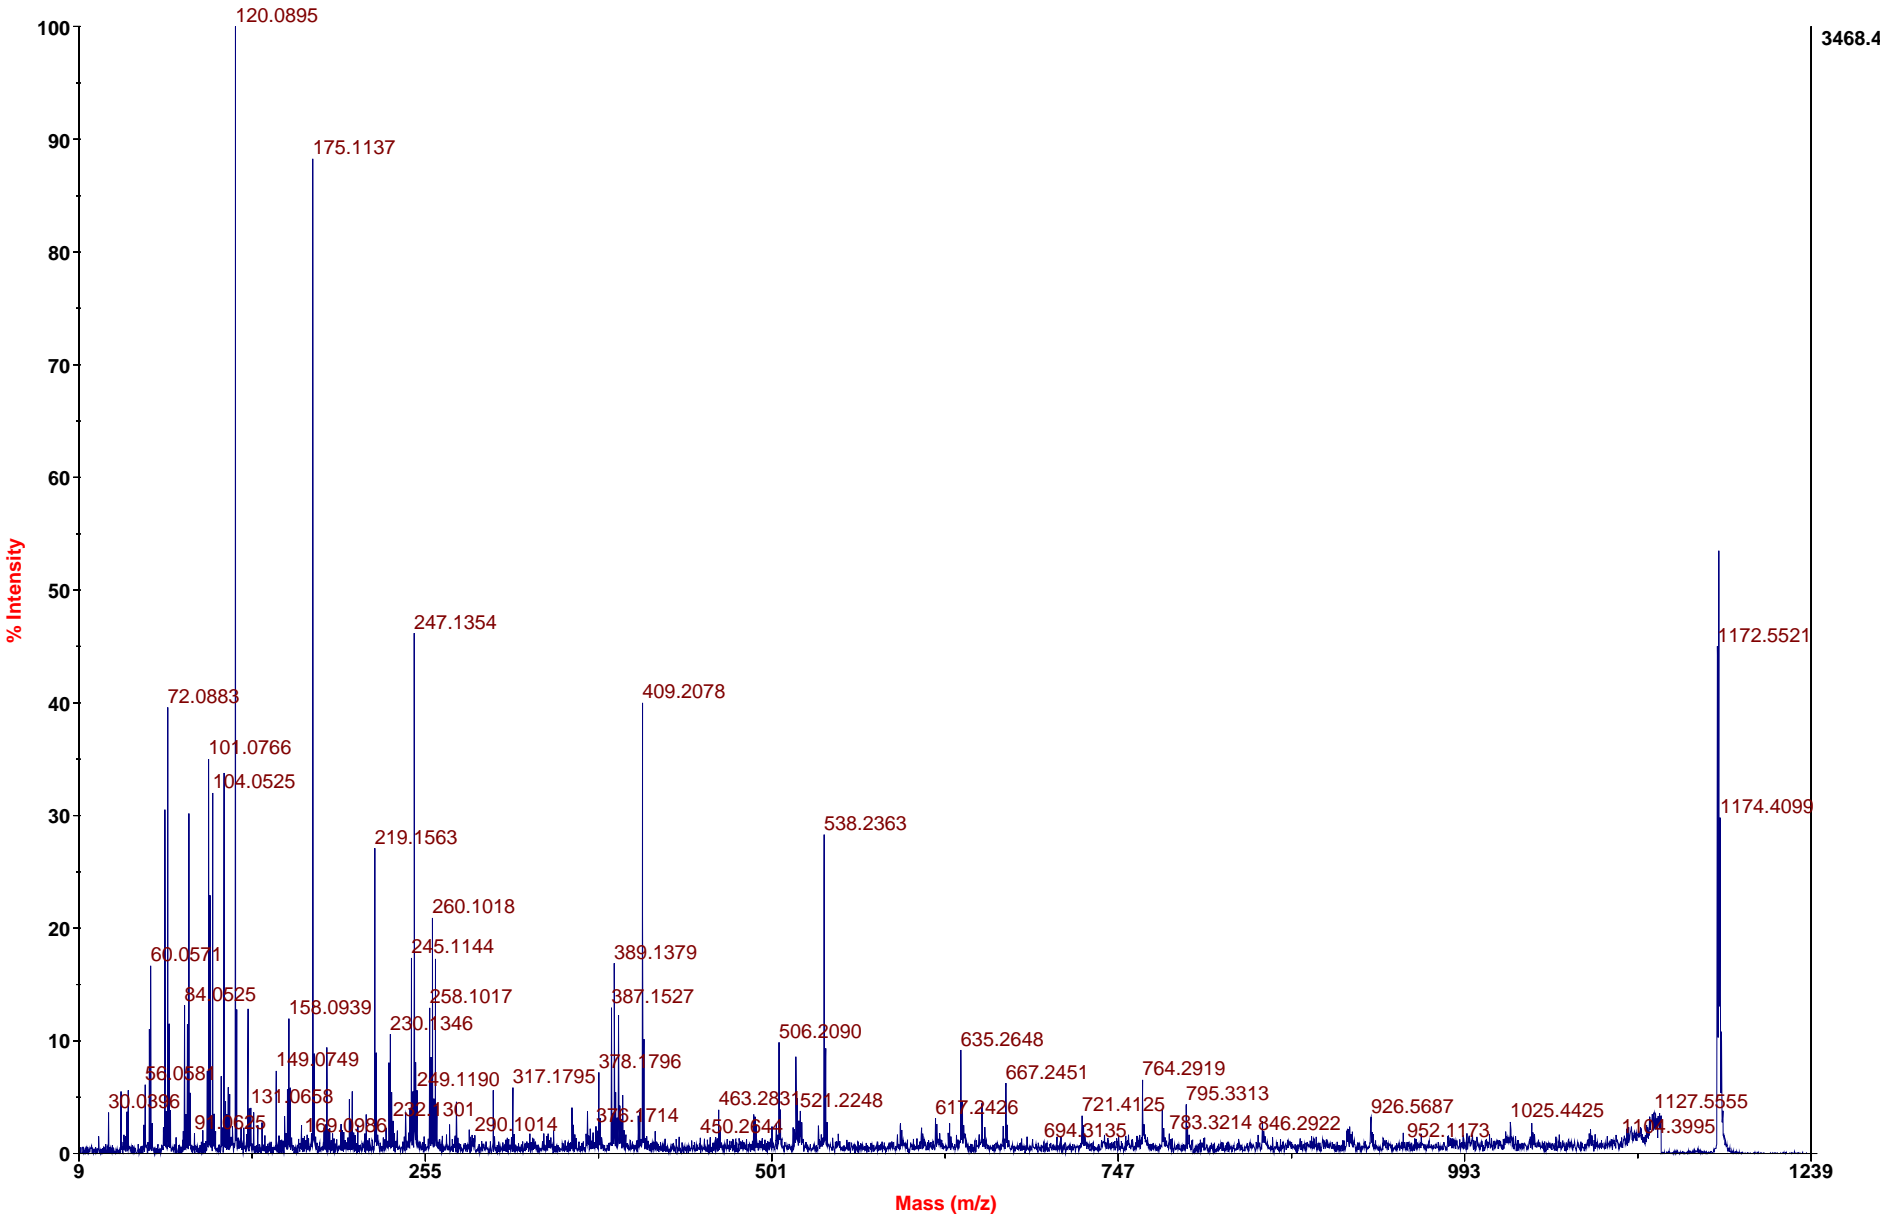

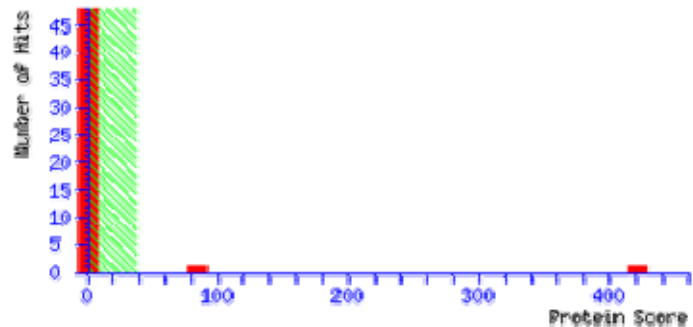

## Peptide Summary Report

Format As Peptide Summary

[Help](#)

Significance threshold  $p <$   Max. number of hits

Standard scoring  MudPIT scoring  Ions score or expect cut-off  Show sub-sets

Show pop-ups  Suppress pop-ups  Sort unassigned  Require bold red

Error tolerant

1. [Q3TEI9\\_MOUSE](#) Mass: 55393 Score: 421 Matches: 15(11) Sequences: 15(11) emPAI: 3.06

2 days neonate thymus thymic cells cDNA, RIKEN full-length enriched library, clone:E430002E15 product:glucose regulated protein

Check to include this hit in error tolerant search

| Query                                                  | Observed  | Mr(expt)  | Mr(calc)  | ppm  | Miss | Score | Expect  | Rank | Unique | Peptide                       |
|--------------------------------------------------------|-----------|-----------|-----------|------|------|-------|---------|------|--------|-------------------------------|
| <input checked="" type="checkbox"/> <a href="#">1</a>  | 997.5465  | 996.5392  | 996.5029  | 36.5 | 0    | 45    | 0.0075  | 1    | U      | K.DASVVGFFR.D                 |
| <input checked="" type="checkbox"/> <a href="#">3</a>  | 1084.6094 | 1083.6021 | 1083.5601 | 38.8 | 0    | 27    | 0.43    | 1    | U      | K.YGVSGYPTLK.I                |
| <input checked="" type="checkbox"/> <a href="#">5</a>  | 1172.5880 | 1171.5807 | 1171.5332 | 40.6 | 0    | 41    | 0.023   | 1    | U      | K.FVMQEEFSR.D                 |
| <input checked="" type="checkbox"/> <a href="#">6</a>  | 1191.6493 | 1190.6420 | 1190.5931 | 41.1 | 0    | 43    | 0.014   | 1    | U      | R.LAPEYEAATR.L                |
| <input checked="" type="checkbox"/> <a href="#">7</a>  | 1236.5663 | 1235.5590 | 1235.5054 | 43.4 | 0    | 72    | 1.7e-05 | 1    | U      | R.DGEEAGAYDGPR.T              |
| <input checked="" type="checkbox"/> <a href="#">9</a>  | 1258.7286 | 1257.7213 | 1257.6717 | 39.4 | 0    | 70    | 2.6e-05 | 1    | U      | R.FAHTNIESLVK.E               |
| <input checked="" type="checkbox"/> <a href="#">10</a> | 1341.7379 | 1340.7306 | 1340.6765 | 40.4 | 0    | 29    | 0.32    | 1    | U      | K.GFPTIYFSPANK.K              |
| <input checked="" type="checkbox"/> <a href="#">11</a> | 1382.7344 | 1381.7271 | 1381.6725 | 39.5 | 0    | 17    | 5.5     | 1    | U      | K.SEPIPESNEGPVK.V             |
| <input checked="" type="checkbox"/> <a href="#">12</a> | 1397.7692 | 1396.7619 | 1396.6987 | 45.3 | 0    | 58    | 0.0004  | 1    | U      | R.ELNDFISYLQR.E               |
| <input checked="" type="checkbox"/> <a href="#">13</a> | 1587.8975 | 1586.8902 | 1586.8093 | 51.0 | 1    | 59    | 0.00029 | 1    | U      | K.FISDKDASVVGFFR.D            |
| <input checked="" type="checkbox"/> <a href="#">14</a> | 1607.8287 | 1606.8214 | 1606.7403 | 50.5 | 0    | 32    | 0.22    | 1    | U      | K.DLLTAYYDVYDK.N              |
| <input checked="" type="checkbox"/> <a href="#">29</a> | 1971.0990 | 1970.0917 | 1969.9897 | 51.8 | 1    | 68    | 4.4e-05 | 1    | U      | K.ALEQLQYFDGNLKR.Y            |
| <input checked="" type="checkbox"/> <a href="#">50</a> | 2302.2703 | 2301.2630 | 2301.1389 | 53.9 | 0    | 75    | 7e-06   | 1    | U      | K.EYDDNGEGITIFRPLHLANK.F      |
| <input checked="" type="checkbox"/> <a href="#">74</a> | 2591.4419 | 2590.4346 | 2590.2915 | 55.2 | 0    | 98    | 3.5e-08 | 1    | U      | K.TFSHELSDFGLESTTGEVPVVAIR.T  |
| <input checked="" type="checkbox"/> <a href="#">79</a> | 2719.5447 | 2718.5374 | 2718.3865 | 55.5 | 1    | 79    | 2.4e-06 | 1    | U      | R.KTFSHELSDFGLESTTGEVPVVAIR.T |

## Protein View

Match to: [Q3TEI9\\_MOUSE](#) Score: 421

2 days neonate thymus thymic cells cDNA, RIKEN full-length enriched library, clone:E430002E15 product:gl

Found in search of ppw\_F2\_129990856215.txt

Nominal mass ( $M_r$ ): 55393; Calculated pI value: 5.53

NCBI BLAST search of [Q3TEI9\\_MOUSE](#) against nr

Unformatted [sequence string](#) for pasting into other applications

Taxonomy: [Mus musculus](#)

Links to retrieve other entries containing this sequence from NCBI Entrez:  
(no taxonomy information for this entry)

Variable modifications: Carbamidomethyl (C), Deamidated (NQ), Oxidation (M)

Cleavage by Trypsin: cuts C-term side of KR unless next residue is P

Sequence Coverage: 35%

Matched peptides shown in **Bold Red**

```
1 MRFSCLLALP GVALLLASAC LAAASDVLEL TDENFESRVS DTGSAGLMLV
51 EFFAPWCGHC KRLAPEYEAA ATRLKGIVPL AKVDCTANTN TCNKYGVSGY
101 PTLKIFRDGE EAGAYDGPRT ADGIVSHLKK QAGPASVPLR TEEEFKKFIS
151 DKDASVVGFF RDLFSDGHSE FLKAASNLRD NYRFAHTNIE SLVKEYDDNG
201 EGITIFRPLH LANKFEDKTV AYTEKKMTSG KIKKFIQDSI FGLCPHMTED
251 NKDLIQGKDL LTAYYDVDYE KNAKGSNYWR NRVMMVAKKF LDAGHKLNFA
301 VASRKTFSHE LSDFGLESTT GEVPVVAIRT AKGEKFVMQE EFSRDGKALE
351 QFLQEYFDGN LKRYLKSEPI PESNEGPVKV VVAENFDDIV NEEDKDVLIE
401 FYAPWCGHCK NLEPKYKELG EKLSKDPNIV IAKMDATAND VSPPYEVKGF
451 PTIYFSPANK KLTPKKYEGG RELNDFISYL QREATNPPII QEEKP
```

Show predicted peptides also

Sort Peptides By

Residue Number  Increasing Mass  Decreasing Mass

| Start - End | Observed  | Mr(expt)  | Mr(calc)  | ppm | Miss | Sequence                                                      |
|-------------|-----------|-----------|-----------|-----|------|---------------------------------------------------------------|
| 63 - 73     | 1191.6493 | 1190.6420 | 1190.5931 | 41  | 0    | R. <b>LAPEYEAA</b> TR.L ( <a href="#">Ions score 43</a> )     |
| 95 - 104    | 1084.6094 | 1083.6021 | 1083.5601 | 39  | 0    | K. <b>YGV</b> SGYPTLK.I ( <a href="#">Ions score 27</a> )     |
| 108 - 119   | 1236.5663 | 1235.5590 | 1235.5054 | 43  | 0    | R. <b>DGEEAGAYDGPRT</b> .T ( <a href="#">Ions score 72</a> )  |
| 148 - 161   | 1587.8975 | 1586.8902 | 1586.8093 | 51  | 1    | K. <b>FISDKDASVVGFFR</b> .D ( <a href="#">Ions score 59</a> ) |



# Sample M17

4700 Reflector Spec #1 MC=>NR(2.00)[BP = 953.5, 9563]

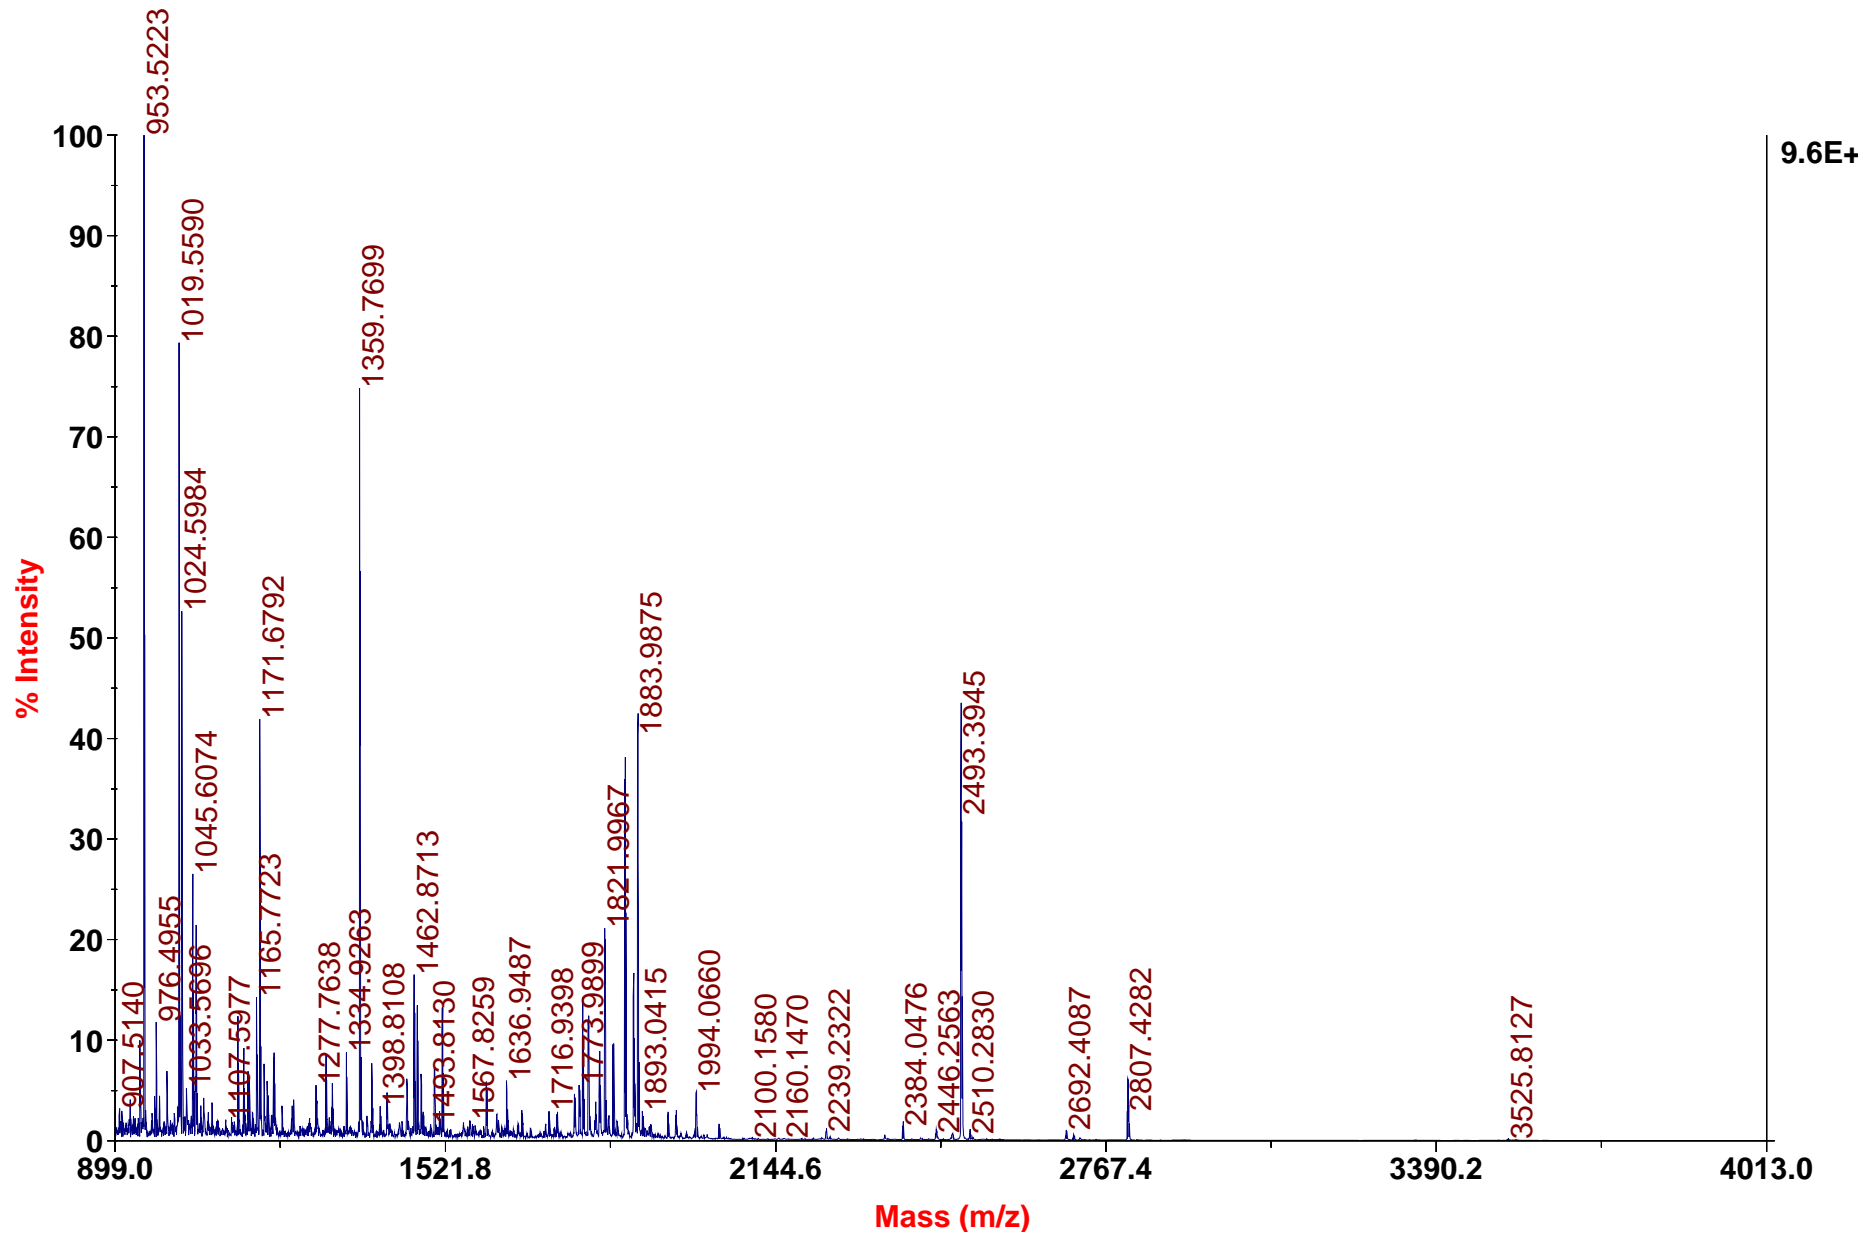



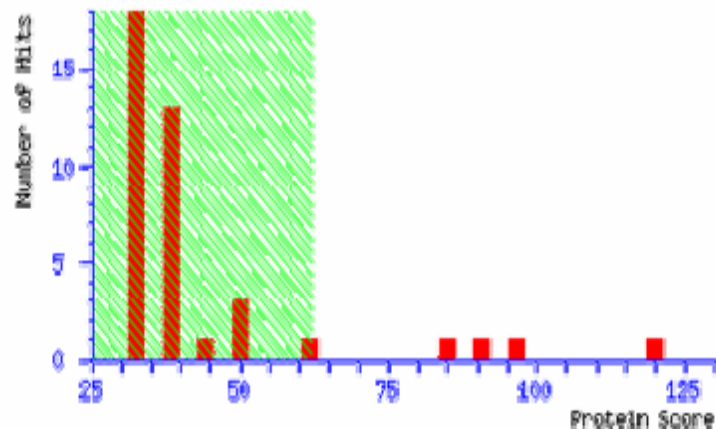

## Concise Protein Summary Report

Format As

Concise Protein Summary

[Help](#)

Significance threshold  $p <$

Max. number of hits

- [Q3U1X3\\_MOUSE](#) **Mass:** 43138 **Score:** 120 **Expect:** 9.2e-08 **Matches:** 35  
 B6-derived CD11 +ve dendritic cells cDNA, RIKEN full-length enriched library, clone:F730110C17 product:pyruvate kinase, mu
- [Q4VC20\\_MOUSE](#) **Mass:** 57808 **Score:** 99 **Expect:** 1.1e-05 **Matches:** 38  
 Pyruvate kinase 3.- Mus musculus (Mouse).

[Q3TBW5\\_MOUSE](#) **Mass:** 57807 **Score:** 99 **Expect:** 1.1e-05 **Matches:** 38  
 NOD-derived CD11c +ve dendritic cells cDNA, RIKEN full-length enriched library, clone:F630218007 product:pyruvate kinase,

[Q3TC59\\_MOUSE](#) **Mass:** 57809 **Score:** 99 **Expect:** 1.1e-05 **Matches:** 37  
 NOD-derived CD11c +ve dendritic cells cDNA, RIKEN full-length enriched library, clone:F630207021 product:pyruvate kinase,

[Q3U5P6\\_MOUSE](#) **Mass:** 57820 **Score:** 99 **Expect:** 1.1e-05 **Matches:** 36  
 Bone marrow macrophage cDNA, RIKEN full-length enriched library, clone:I830166F06 product:pyruvate kinase, muscle, full i

[Q3TBV8\\_MOUSE](#) **Mass:** 57750 **Score:** 90 **Expect:** 8.4e-05 **Matches:** 37  
 NOD-derived CD11c +ve dendritic cells cDNA, RIKEN full-length enriched library, clone:F630220E24 product:pyruvate kinase,

## Protein View

Match to: Q3U1X3\_MOUSE Score: 120 Expect: 9.2e-08

B6-derived CD11 +ve dendritic cells cDNA, RIKEN full-length enriched library, clone:F730110C17 product:pyruvate kinase, muscle

Found in search of pmf\_A6\_129990866000.txt

Nominal mass (M<sub>r</sub>): 43138; Calculated pI value: 5.88

NCBI BLAST search of [Q3U1X3\\_MOUSE](#) against nr

Unformatted [sequence string](#) for pasting into other applications

Taxonomy: [Mus musculus](#)

Links to retrieve other entries containing this sequence from NCBI Entrez:

(no taxonomy information for this entry)

Variable modifications: Carbamidomethyl (C), Deamidated (NQ), Oxidation (M)

Cleavage by Trypsin: cuts C-term side of KR unless next residue is P

Number of mass values searched: 159

Number of mass values matched: 35

Sequence Coverage: 83%

Matched peptides shown in **Bold Red**

```
1  MPKPHSEAGT AFIQTQQLHA AMADTFLEHM CRLDIDSAPI TARNTGIICT
51  IGPASRSVEM LKEMIKSGMN VARLNFSHGT HEYHAETIKN VREATESFAS
101 DPILYRPVAV ALDTKGPEIR TGLIKGSGTA EVELKKGATL KITLDNAYME
151 KCDENILWLD YKNICKVVEV GSKIYVDDGL ISLQVKEKGA DFLVTEVENG
201 GSLGSKKGVN LPGAAVDLPA VSEKDIQDLK FGVEQDQDMV FASFIRKAAD
251 VHEVRKVLGE KGNIKIISK IENHEGVRRE DEILEASDGI MVARGLGIE
301 IPAQKVFLLAQ KMMIGRCNRA GKPVICATQM LESMIKKPRP TRAEQSDVAN
351 AVLDGADCIM LSGETAKGDY PLEAVRMQHL IAREAEAAMF HRLLF
```

Show predicted peptides also

Sort Peptides By

Residue Number  Increasing Mass  Decreasing Mass

| Start - End | Observed  | Mr(expt)  | Mr(calc)  | ppm | Miss | Sequence                                     |                     |
|-------------|-----------|-----------|-----------|-----|------|----------------------------------------------|---------------------|
| 2 - 32      | 3523.7729 | 3522.7656 | 3522.6595 | 30  | 0    | <b>M. PKPHSEAGTAFIQTQQLHAAMADTFLEHMCR. L</b> | Carbamidomethyl (C) |
| 33 - 43     | 1171.6792 | 1170.6719 | 1170.6244 | 41  | 0    | <b>R. LDIDSAPITAR. N</b>                     |                     |
| 44 - 56     | 1302.7417 | 1301.7344 | 1301.6762 | 45  | 0    | <b>R. NTGIICTIGPASR. S</b>                   |                     |
| 44 - 56     | 1359.7695 | 1358.7622 | 1358.6976 | 48  | 0    | <b>R. NTGIICTIGPASR. S</b>                   | Carbamidomethyl (C) |
| 44 - 62     | 1990.0870 | 1989.0797 | 1989.0387 | 21  | 1    | <b>R. NTGIICTIGPASRSVEMLK. E</b>             |                     |
| 63 - 73     | 1235.6343 | 1234.6270 | 1234.6162 | 9   | 1    | <b>K. EMIKSGMVAR. L</b>                      |                     |
| 74 - 89     | 1883.9849 | 1882.9776 | 1882.8962 | 43  | 0    | <b>R. LNFSGTHEYHAETIK. N</b>                 |                     |
| 93 - 115    | 2493.3906 | 2492.3833 | 2492.2798 | 42  | 0    | <b>R. EATESFASDPILYRPVAVALDTK. G</b>         |                     |
| 126 - 136   | 1118.6117 | 1117.6044 | 1117.5979 | 6   | 1    | <b>K. GSGTAEVELKK. G</b>                     |                     |
| 142 - 151   | 1197.6309 | 1196.6236 | 1196.5747 | 41  | 0    | <b>K. ITLDNAYMEK. C</b>                      |                     |
| 142 - 151   | 1213.6306 | 1212.6233 | 1212.5696 | 44  | 0    | <b>K. ITLDNAYMEK. C</b>                      | Oxidation (M)       |
| 152 - 162   | 1411.7306 | 1410.7233 | 1410.6400 | 50  | 0    | <b>K. CDENILWLDYK. N</b>                     |                     |

# M17

4700 MS/MS Precursor 1051.74 Spec #1 MC[BP = 861.0, 4180]

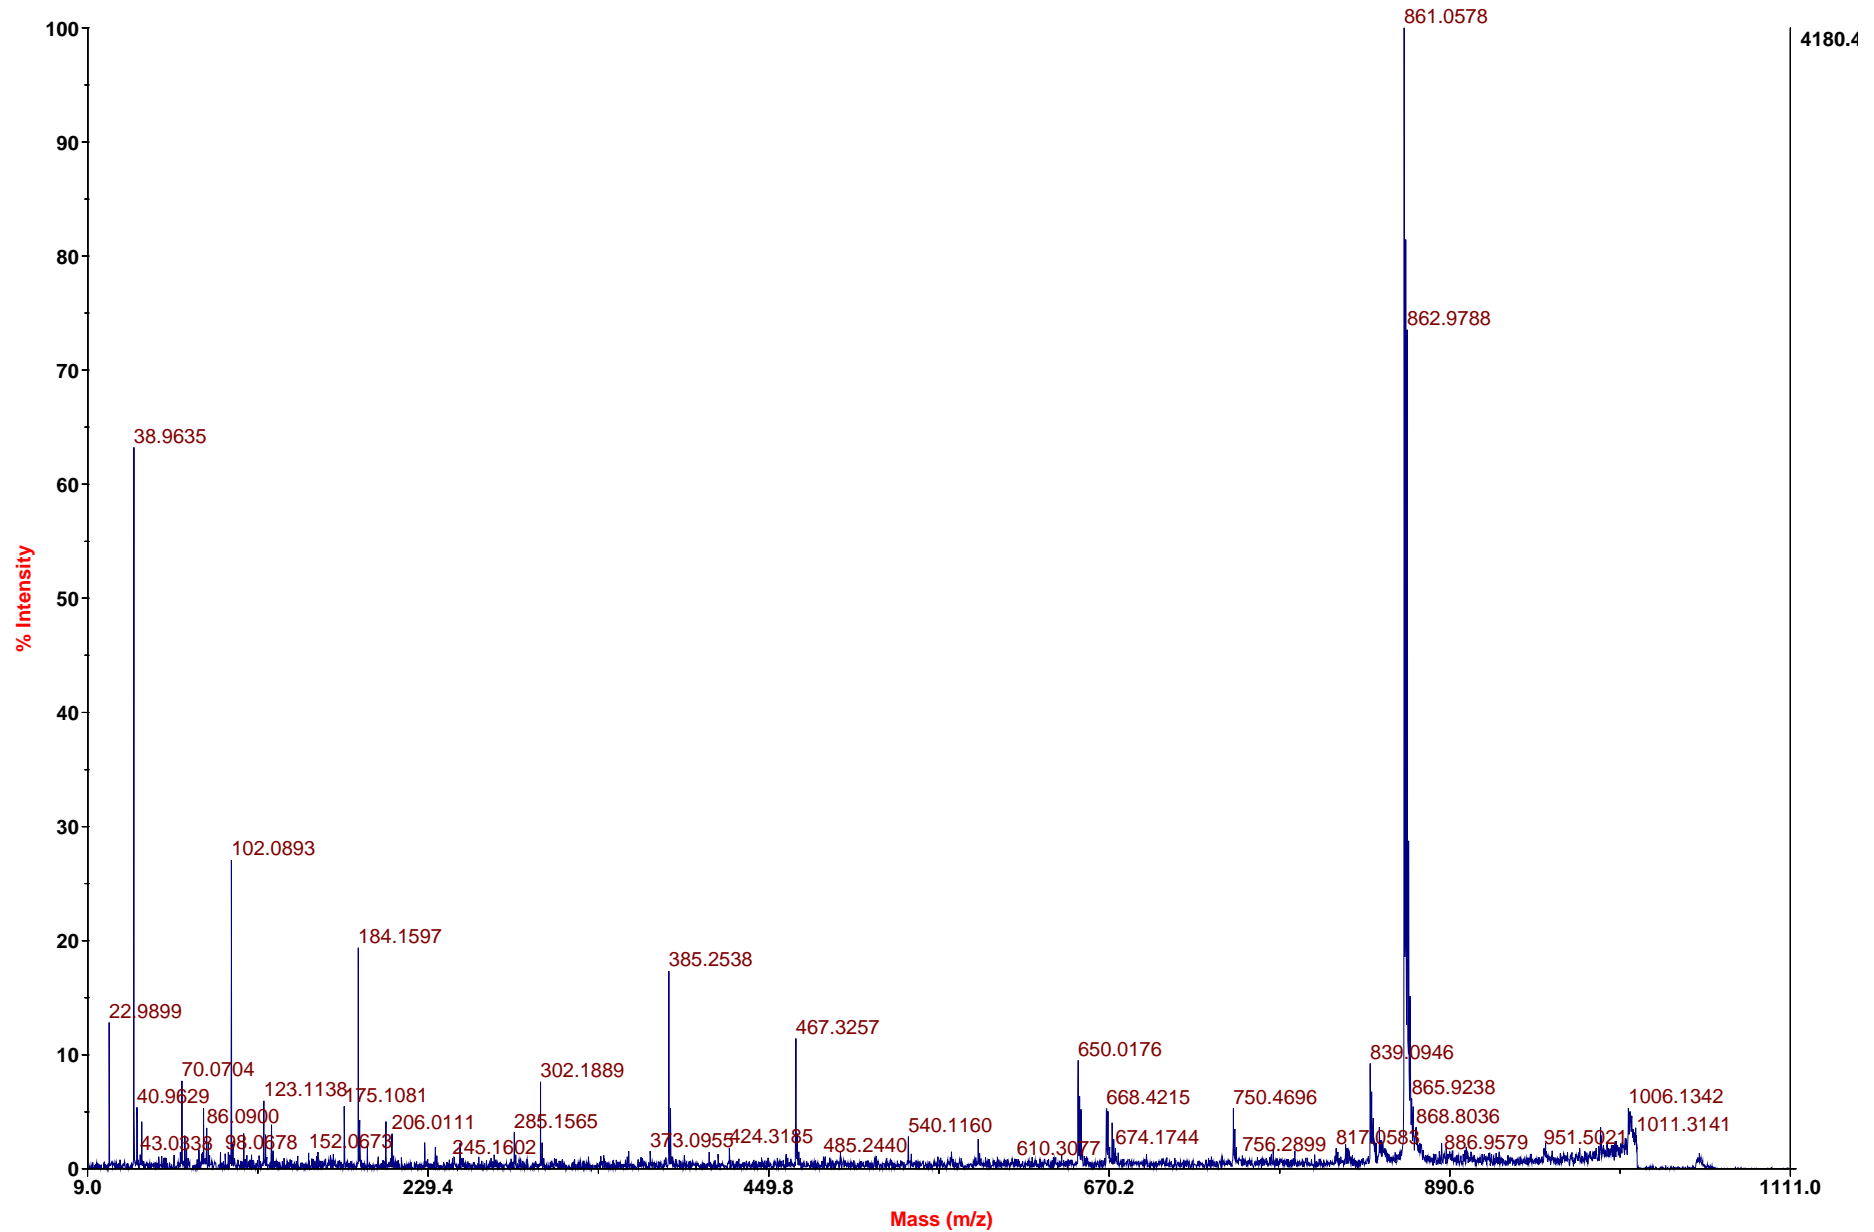

# M17

4700 MS/MS Precursor 976.496 Spec #1 MC[BP = 343.2, 1047]

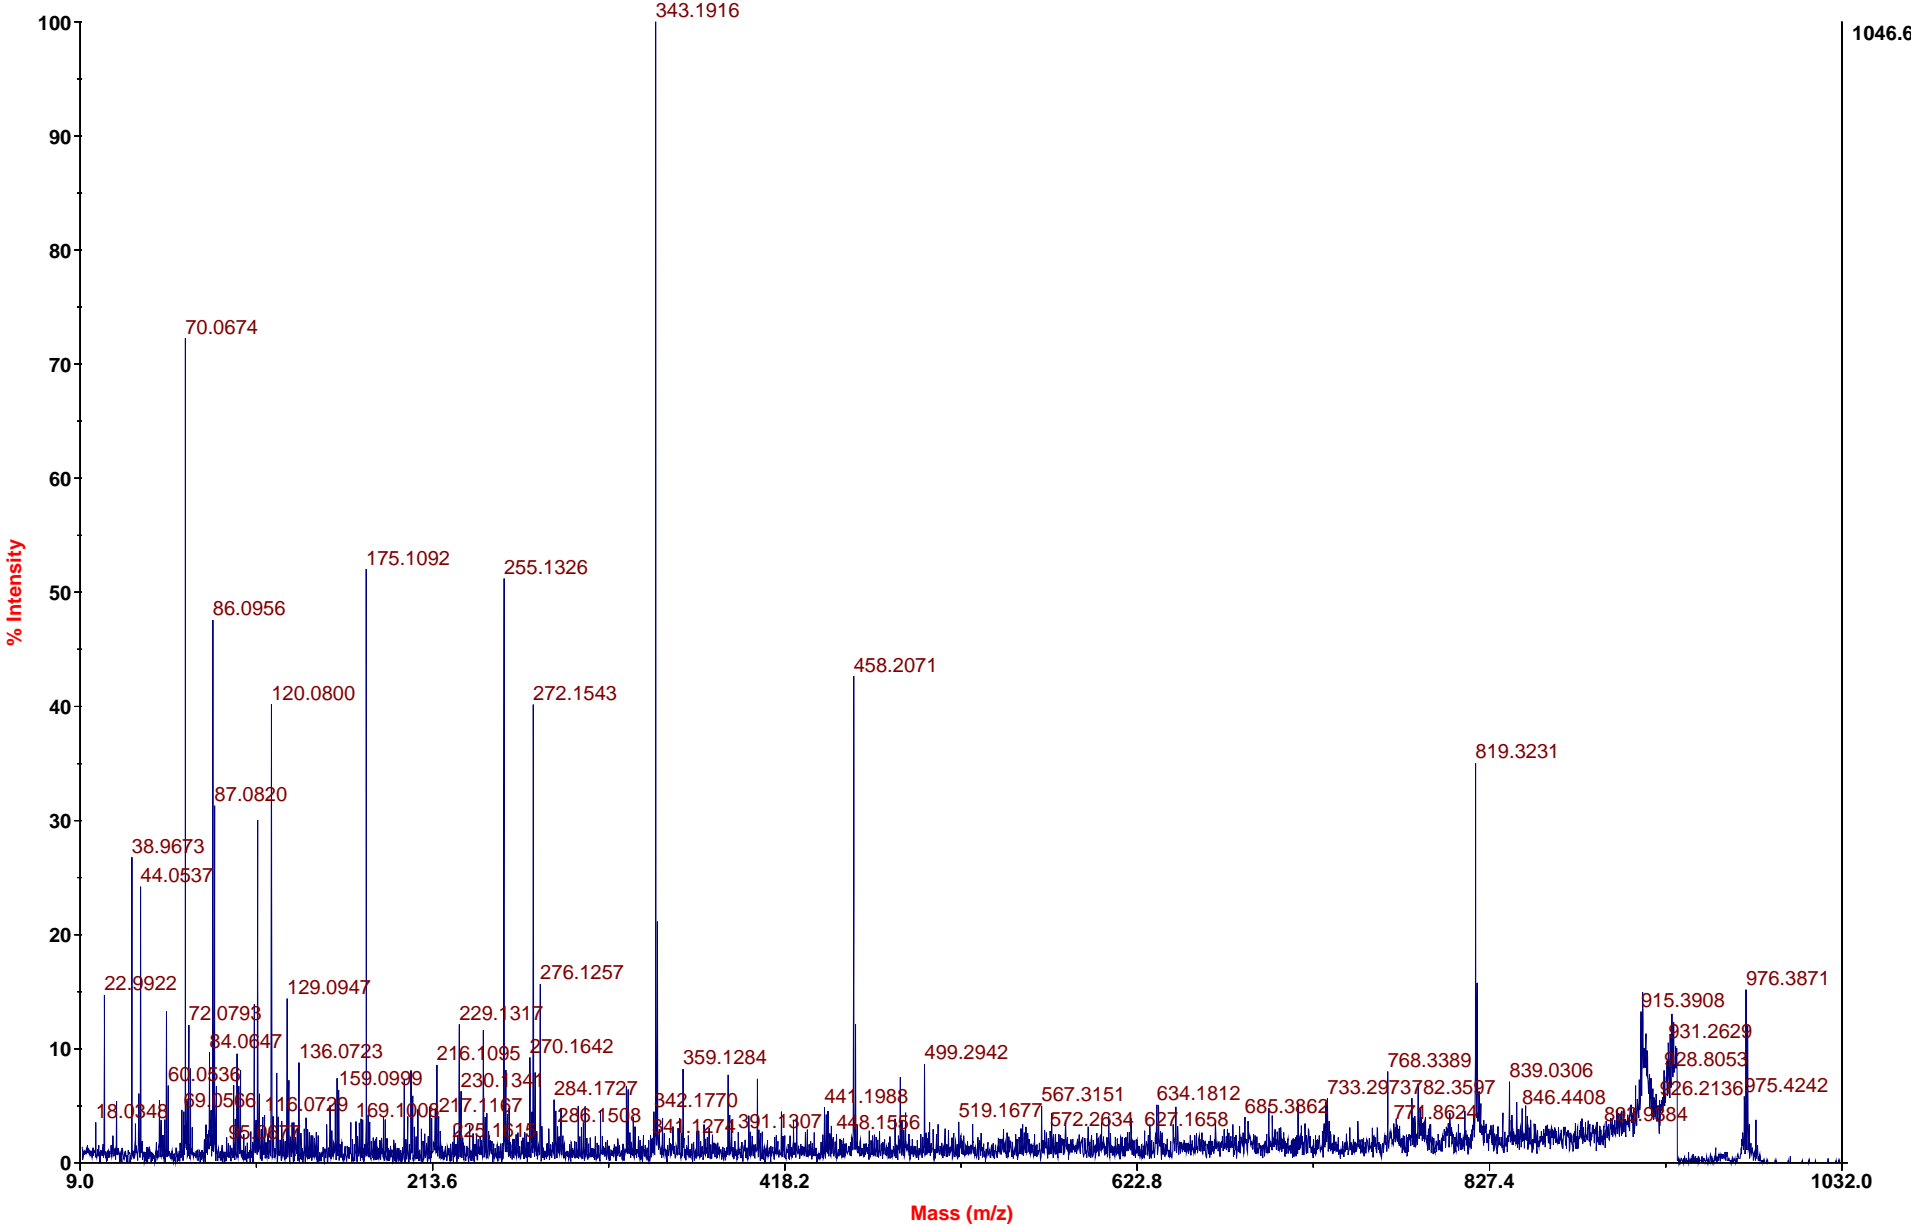

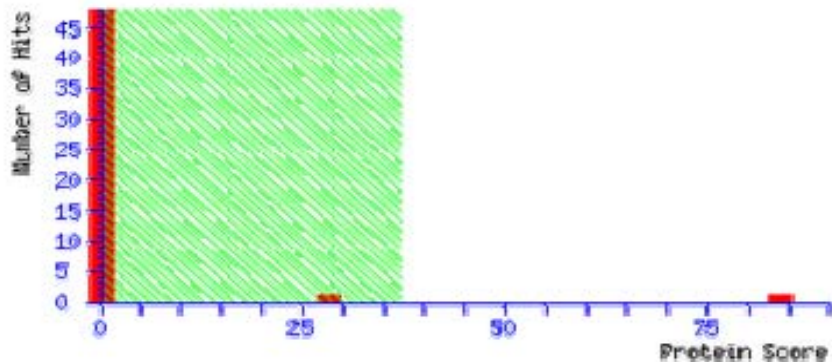

## Peptide Summary Report

Format As

Peptide Summary

[Help](#)

Significance threshold  $p <$

Max. number of hits

Standard scoring

MudPIT scoring

Ions score or expect cut-off

Show sub-sets

Show pop-ups  Suppress pop-ups

Sort unassigned

Require bold red

Select All

Select None

Search Selected

Error tolerant

1. [KPYM MOUSE](#) Mass: 57719 Score: 84 Matches: 10(3) Sequences: 10(3) emPAI: 0.98

Pyruvate kinase isozyme M2 (EC 2.7.1.40).- Mus musculus (Mouse).

Check to include this hit in error tolerant search

| Query                                                  | Observed  | Mr(expt)  | Mr(calc)  | ppm  | Miss | Score | Expect | Rank | Unique | Peptide                     |
|--------------------------------------------------------|-----------|-----------|-----------|------|------|-------|--------|------|--------|-----------------------------|
| <input checked="" type="checkbox"/> <a href="#">1</a>  | 953.5208  | 952.5135  | 952.4726  | 42.9 | 0    | 37    | 0.037  | 1    | U      | K.IENHEGVR.R                |
| <input checked="" type="checkbox"/> <a href="#">3</a>  | 1019.5587 | 1018.5514 | 1018.5083 | 42.3 | 0    | 31    | 0.23   | 1    | U      | K.GDYPLEAVR.M               |
| <a href="#">7</a>                                      | 1141.6431 | 1140.6358 | 1140.6026 | 29.1 | 0    | 22    | 1.4    | 3    |        | R.GDLGIEIPA EK.V            |
| <input checked="" type="checkbox"/> <a href="#">8</a>  | 1171.6792 | 1170.6719 | 1170.6244 | 40.6 | 0    | 39    | 0.029  | 1    | U      | R.LDIDSAPITAR.N             |
| <input checked="" type="checkbox"/> <a href="#">9</a>  | 1359.7695 | 1358.7622 | 1358.6976 | 47.5 | 0    | 34    | 0.11   | 1    | U      | R.NTGIICTIGPASR.S + Carbami |
| <input checked="" type="checkbox"/> <a href="#">10</a> | 1462.8705 | 1461.8632 | 1461.8079 | 37.9 | 0    | 34    | 0.06   | 1    | U      | K.IYVDDGLISLQVK.E           |
| <input checked="" type="checkbox"/> <a href="#">13</a> | 1779.9463 | 1778.9390 | 1778.8687 | 39.6 | 0    | 46    | 0.0075 | 1    | U      | K.GADFLVTEVENGGSLGSK.K      |
| <input checked="" type="checkbox"/> <a href="#">18</a> | 1821.9973 | 1820.9900 | 1820.9091 | 44.5 | 1    | 23    | 1.6    | 1    | U      | R.RFDEILEASDGIMVAR.G        |
| <input checked="" type="checkbox"/> <a href="#">22</a> | 1859.9863 | 1858.9790 | 1858.8924 | 46.6 | 0    | 16    | 7.9    | 1    | U      | K.FGVEQDVMVFASFIR.K         |
| <input checked="" type="checkbox"/> <a href="#">24</a> | 1883.9849 | 1882.9776 | 1882.8962 | 43.2 | 0    | 26    | 0.72   | 1    | U      | R.LNFSGTHEYHAETIK.N         |



## Protein View

Match to: **KPYM\_MOUSE** Score: 84  
Pyruvate kinase isozyme M2 (EC 2.7.1.40). - *Mus musculus* (Mouse).  
Found in search of ppw\_A6\_129990871300.txt

Nominal mass ( $M_r$ ): 57719; Calculated pI value: 7.42  
NCBI BLAST search of [KPYM\\_MOUSE](#) against nr  
Unformatted [sequence string](#) for pasting into other applications

Taxonomy: [Mus musculus](#)

Variable modifications: Carbamidomethyl (C), Deamidated (NQ), Oxidation (M)  
Cleavage by Trypsin: cuts C-term side of KR unless next residue is P  
Sequence Coverage: 24%

Matched peptides shown in **Bold Red**

```
1 PKPHSEAGTA FIQTQQLHAA MADTFLEHMC RLDIDSAPIT ARNTGIICTI
51 GPASRSVEML KEMIKSGMNV ARLNFSHGTH EYHAETIKNV REATESFASD
101 PILYRPFVAVA LDTKGPFIPT GLIKGSGTAE VELKKGATLK ITLDNAYMEK
151 CDENILWLDY KNICKVVEVG SKIYVDDGLI SLQVKEKGAD FLVTEVENGG
201 SLGSKKGVNLF GAAVDLPVAV SEKDIQDLKF GVEQDVMVF ASFIRKAADV
251 HEVRKVLGEEK GKNIKIISKI ENHEGVRRFD EILEASDGIM VARGDLGIEI
301 PAEKVFLAQQ MMIGRCNRAG KPVICSTQML EIMIKKPRPT RAEGSDVANA
351 VLDGADCIML SGETAKGDYP LEAVRMQHLI AREAEAAIYH LQLFEELRRL
401 APITSDPTEA AAVGAVEASF KCCSGAIIVL TKSGRSAHQV ARYRFRAPII
451 AVTRNPQTAR QAHLYRGIFF VLCKDAVLNA WAEDVDLRVN LAMDVGKARG
501 FFKKGDVVIV LIGWRPGSGF INTMRVVPVF
```

Show predicted peptides also

Sort Peptides By

Residue Number  Increasing Mass  Decreasing Mass

| Start | End | Observed  | Mr(expt)  | Mr(calc)  | ppm | Miss | Sequence                                                        |
|-------|-----|-----------|-----------|-----------|-----|------|-----------------------------------------------------------------|
| 32    | 42  | 1171.6792 | 1170.6719 | 1170.6244 | 41  | 0    | <b>R.LDIDSAPITAR.N</b> ( <a href="#">Ions score 39</a> )        |
| 43    | 55  | 1359.7695 | 1358.7622 | 1358.6976 | 48  | 0    | <b>R.NTGIICTIGPASR.S</b> Carbamidomethyl (C)                    |
| 73    | 88  | 1883.9849 | 1882.9776 | 1882.8962 | 43  | 0    | <b>R.LNFSHGTHEYHAETIK.N</b> ( <a href="#">Ions score 26</a> )   |
| 173   | 185 | 1462.8705 | 1461.8632 | 1461.8079 | 38  | 0    | <b>K.IYVDDGLISLQVK.E</b> ( <a href="#">Ions score 34</a> )      |
| 188   | 205 | 1779.9463 | 1778.9390 | 1778.8687 | 40  | 0    | <b>K.GADFLVTEVENGGSLGSK.K</b> ( <a href="#">Ions score 46</a> ) |
| 230   | 245 | 1859.9863 | 1858.9790 | 1858.8924 | 47  | 0    | <b>K.FGVEQDVMVFASFIR.K</b> ( <a href="#">Ions score 16</a> )    |
| 270   | 277 | 953.5208  | 952.5135  | 952.4726  | 43  | 0    | <b>K.IENHEGVR.R</b> ( <a href="#">Ions score 37</a> )           |
| 278   | 293 | 1821.9973 | 1820.9900 | 1820.9091 | 44  | 1    | <b>R.RFDEILEASDGIMVAR.G</b> ( <a href="#">Ions score 23</a> )   |
| 294   | 304 | 1141.6431 | 1140.6358 | 1140.6026 | 29  | 0    | <b>R.GDLGIEIPAEC.V</b> ( <a href="#">Ions score 22</a> )        |
| 367   | 375 | 1019.5587 | 1018.5514 | 1018.5083 | 42  | 0    | <b>K.GDYPLEAVR.M</b> ( <a href="#">Ions score 31</a> )          |

# Sample M18

4700 Reflector Spec #1 MC=>NR(2.00)[BP = 1032.6, 17735]

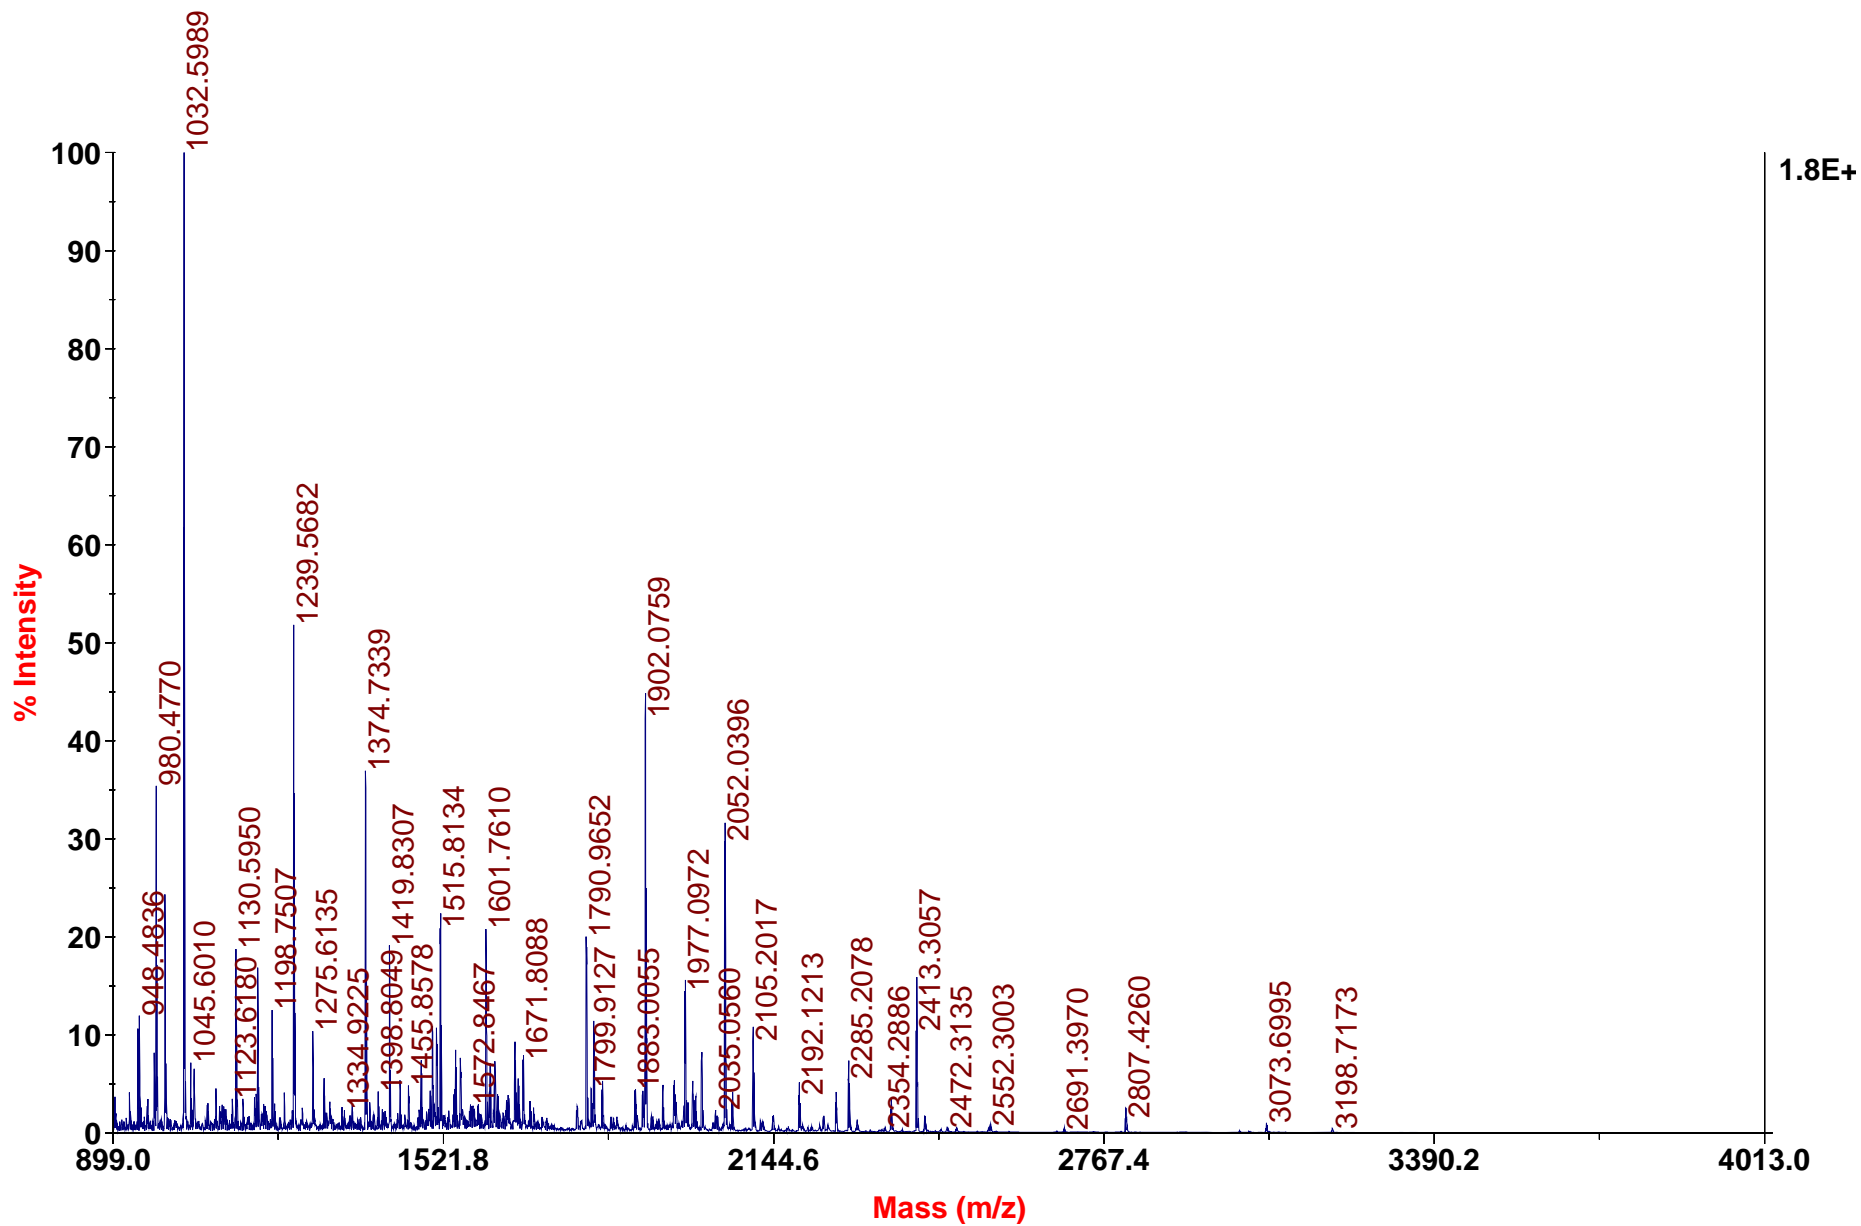

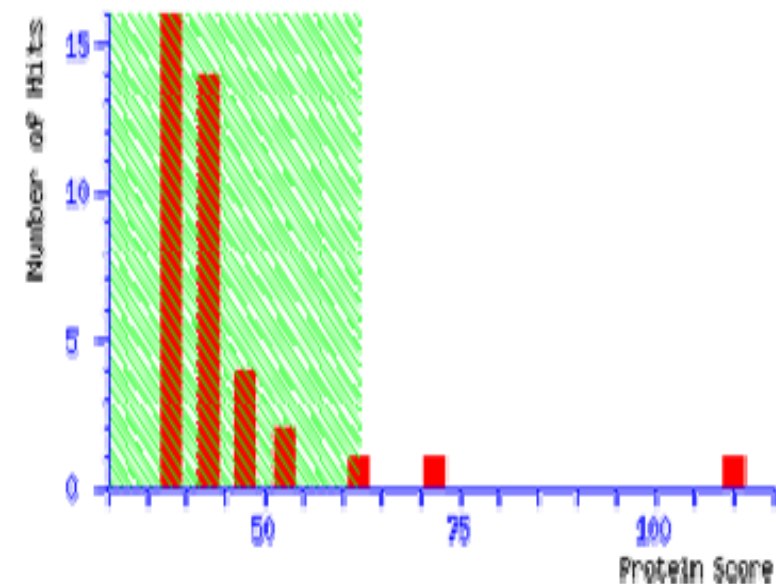

## Concise Protein Summary Report

Format As

Concise Protein Summary

[Help](#)

Significance threshold  $p <$

Max. number of hits

- [Q3TGR2 MOUSE](#) Mass: 54718 Score: **110** Expect: 9.2e-07 Matches: 42  
 17 days pregnant adult female amnion cDNA, RIKEN full-length enriched library, clone:I920039H17 product:fibrinogen,

[AAL02225](#) Mass: 27037 Score: **71** Expect: 0.0072 Matches: 26  
 AF413205 NID: - Mus musculus



## Protein View

Match to: Q3TGR2\_MOUSE Score: 110 Expect: 9.2e-07

17 days pregnant adult female amnion cDNA, RIKEN full-length enriched library, clone:I920039H17 product:fibrinogen

Found in search of pmf\_B6\_129990866001.txt

Nominal mass ( $M_r$ ): 54718; Calculated pI value: 6.68

NCBI BLAST search of [Q3TGR2\\_MOUSE](#) against nr

Unformatted [sequence string](#) for pasting into other applications

Taxonomy: [Mus musculus](#)

Links to retrieve other entries containing this sequence from NCBI Entrez:

(no taxonomy information for this entry)

Variable modifications: Carbamidomethyl (C), Deamidated (NQ), Oxidation (M)

Cleavage by Trypsin: cuts C-term side of KR unless next residue is P

Number of mass values searched: 182

Number of mass values matched: 42

Sequence Coverage: 66%

Matched peptides shown in **Bold Red**

```
1 MRHLWLLLLL CVFSVQTQAA DDDYDEPTDS LDARGHRPVD RRKKEEPPSLR
51 PAPPPISGGG YRARPAKATA NQKKVERRRP DAGGCLHADT DMGVLCPTGC
101 TLQQTLLNQE RPIKSSIAEL NNNIQSVSDT SSVTFQYLTL LKDMWKKKQA
151 QVKENENVIN EYSSILEDQR LYIDETVNDN IPLNLRVLS ILEDLRSKIQ
201 KLESDISAQM EYCRTPCTVS CNIPVVSGKE CEEIIRKGGG TSEMYLIQPD
251 TSIKPYRVYC DMKTENGGWT VIQNRQDGSV DFGRKWDFYK KGFGNIATNE
301 DAKKYCGLPG EYWLGNDKIS QLTRMGPTL LIEMEDWKGD KVKAHYGGFT
351 VQNEASKYQV SVNKYKGTAG NALMDGASQL VGENRTMTIH NGMFFSTYDR
401 DNDGWVTTDP RKQCSKEDGG GWWYNRCHAA NPNGRYWGG LYSWDMSKHG
451 TDDGVVWMNW KGSWYSMRM SMKIRPFFPQ Q
```

Show predicted peptides also

Sort Peptides By

Residue Number  Increasing Mass  Decreasing Mass

| Start - End | Observed  | Mr(expt)  | Mr(calc)  | ppm | Miss | Sequence                                         |
|-------------|-----------|-----------|-----------|-----|------|--------------------------------------------------|
| 43 - 62     | 2105.2007 | 2104.1934 | 2104.1065 | 41  | 1    | R. <b>KKEEPPSLRPAPPPISGGGYR.A</b>                |
| 44 - 62     | 1977.0981 | 1976.0908 | 1976.0116 | 40  | 0    | K. <b>EPEPPSLRPAPPPISGGGYR.A</b>                 |
| 115 - 142   | 3072.7024 | 3071.6951 | 3071.5663 | 42  | 0    | K. <b>SSIAELNNNIQSVSDTSSVTFQYLTLK.D</b>          |
| 154 - 170   | 2052.0364 | 2051.0291 | 2050.9443 | 41  | 0    | K. <b>ENENVINEYSSILEDQR.L</b>                    |
| 171 - 186   | 1902.0759 | 1901.0686 | 1900.9894 | 42  | 0    | R. <b>LYIDETVNDNIPLNLR.V</b>                     |
| 199 - 214   | 1971.0605 | 1970.0532 | 1969.9237 | 66  | 1    | K. <b>IQKLESDISAQMEYCR.T</b> Carbamidomethyl (C) |
| 202 - 214   | 1601.7582 | 1600.7509 | 1600.6861 | 40  | 0    | K. <b>LESDISAQMEYCR.T</b> Carbamidomethyl (C)    |

# M18

4700 MS/MS Precursor 2052.04 Spec #1 MC[BP = 303.1, 3349]

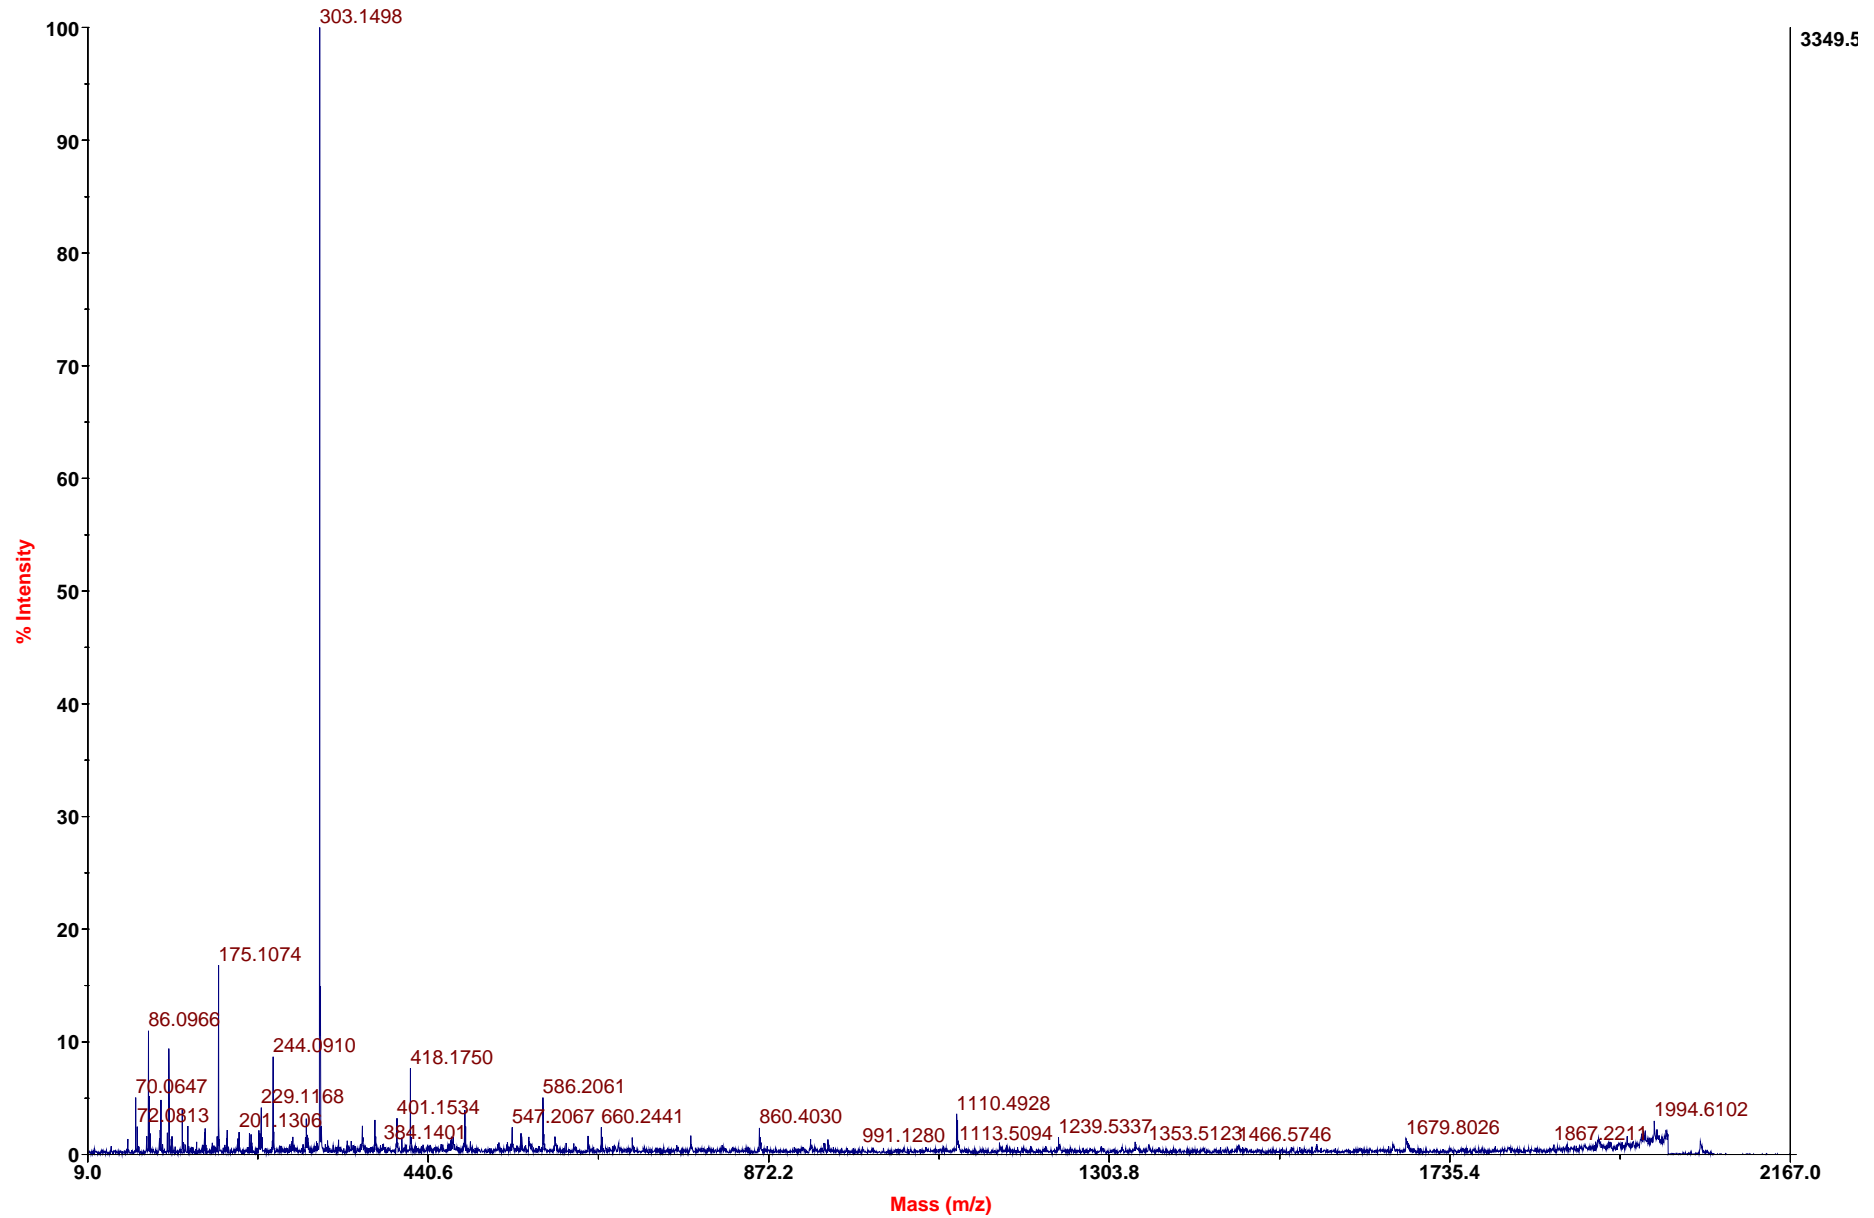

# M18

4700 MS/MS Precursor 1419.83 Spec #1 MC[BP = 110.1, 1416]

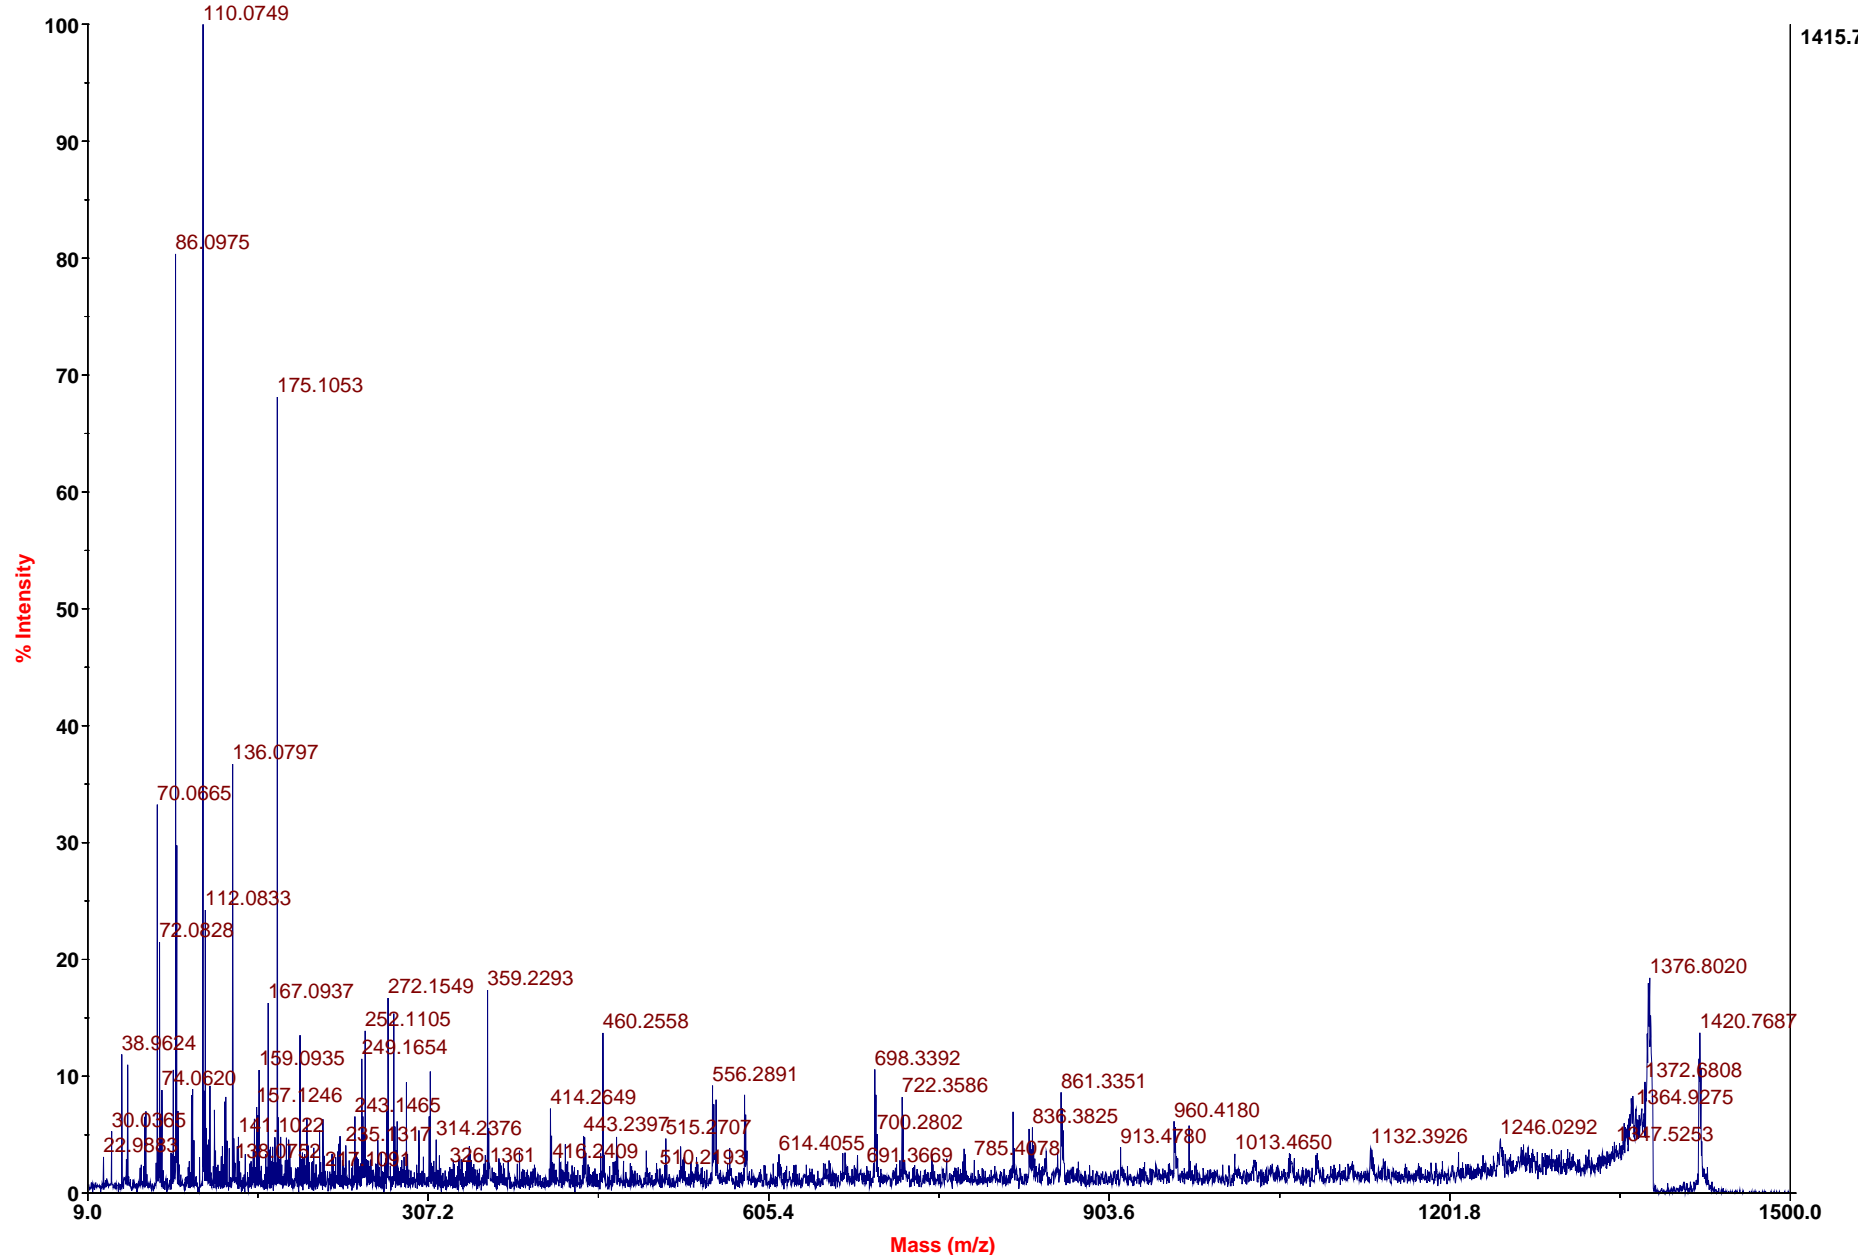

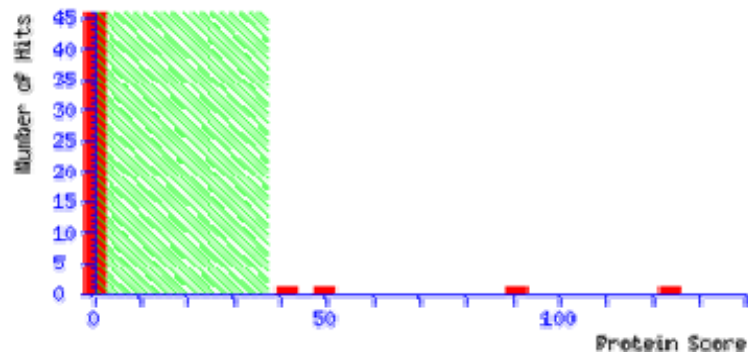

## Peptide Summary Report

Format As

Peptide Summary

[Help](#)

Significance threshold  $p <$

Max. number of hits

Standard scoring  MudPIT scoring  Ions score or expect cut-off

Show sub-sets

Show pop-ups  Suppress pop-ups  Sort unassigned

Require bold red

Error tolerant

1. [Q3TGR2 MOUSE](#) Mass: 54718 Score: 124 Matches: 12(3) Sequences: 12(3) emPAI: 0.68  
 17 days pregnant adult female amnion cDNA, RIKEN full-length enriched library, clone:I920039H17 product:fibrinogen,  
 Check to include this hit in error tolerant search

| Query                                                  | Observed  | Mr(expt)  | Mr(calc)  | ppm  | Miss | Score | Expect  | Rank | Unique | Peptide                                 |                                         |
|--------------------------------------------------------|-----------|-----------|-----------|------|------|-------|---------|------|--------|-----------------------------------------|-----------------------------------------|
| <input checked="" type="checkbox"/> <a href="#">1</a>  | 980.4769  | 979.4697  | 979.4359  | 34.4 | 0    | 27    | 0.52    | 1    | U      | R.QDGSVDFGR.K                           |                                         |
| <input checked="" type="checkbox"/> <a href="#">2</a>  | 996.4788  | 995.4715  | 995.4355  | 36.2 | 0    | 33    | 0.11    | 1    | U      | R.CHANPNGR.Y + Carbamidomethyl (C)      |                                         |
| <input checked="" type="checkbox"/> <a href="#">3</a>  | 1032.5969 | 1031.5896 | 1031.5553 | 33.3 | 0    | 18    |         | 5    | 1      | U                                       | K.IRPFPPQQ.-                            |
| <input checked="" type="checkbox"/> <a href="#">7</a>  | 1239.5681 | 1238.5608 | 1238.5105 | 40.6 | 0    | 6     |         | 65   | 4      | U                                       | K.EDGGGWYNR.C                           |
| <input checked="" type="checkbox"/> <a href="#">8</a>  | 1374.7316 | 1373.7243 | 1373.6688 | 40.4 | 0    | 22    | 2.2     | 1    | U      | K.TENGGWTVIQNR.Q                        |                                         |
| <input checked="" type="checkbox"/> <a href="#">12</a> | 1601.7582 | 1600.7509 | 1600.6861 | 40.5 | 0    | 15    | 9.6     | 1    | U      | K.LESDISAQMEYCR.T + Carbamidomethyl (C) |                                         |
| <input checked="" type="checkbox"/> <a href="#">13</a> | 1671.8080 | 1670.8007 | 1670.7399 | 36.4 | 0    | 15    |         | 11   | 1      | U                                       | K.YCGLPGEYWLGNK.I + Carbamidomethyl (C) |
| <input checked="" type="checkbox"/> <a href="#">23</a> | 1902.0759 | 1901.0686 | 1900.9894 | 41.7 | 0    | 42    | 0.015   | 1    | U      | R.LYIDETVNDNIPLNLR.V                    |                                         |
| <input checked="" type="checkbox"/> <a href="#">29</a> | 1977.0981 | 1976.0908 | 1976.0116 | 40.1 | 0    | 17    | 6.1     | 1    | U      | K.EEPPSLRPAPPPISGGGYR.A                 |                                         |
| <input checked="" type="checkbox"/> <a href="#">32</a> | 2052.0364 | 2051.0291 | 2050.9443 | 41.4 | 0    | 51    | 0.0023  | 1    | U      | K.ENENVINEYSSILEDQR.L                   |                                         |
| <input checked="" type="checkbox"/> <a href="#">36</a> | 2105.2007 | 2104.1934 | 2104.1065 | 41.3 | 1    | 19    | 2.6     | 1    | U      | R.KEEPPSLRPAPPPISGGGYR.A                |                                         |
| <input checked="" type="checkbox"/> <a href="#">57</a> | 2413.3040 | 2412.2967 | 2412.1995 | 40.3 | 1    | 70    | 2.6e-05 | 1    | U      | R.KGGETSEMYLIQPDTSIKPYR.V               |                                         |

# Protein View

Match to: Q3TGR2\_MOUSE Score: 124

17 days pregnant adult female amnion cDNA, RIKEN full-length enriched library, clone:I920039H17 product:fibrinogen, B beta  
Found in search of ppw\_B6\_129990871401.txt

Nominal mass (M<sub>r</sub>): 54718; Calculated pI value: 6.68

NCBI BLAST search of [Q3TGR2\\_MOUSE](#) against nr

Unformatted [sequence string](#) for pasting into other applications

Taxonomy: [Mus musculus](#)

Links to retrieve other entries containing this sequence from NCBI Entrez:

(no taxonomy information for this entry)

Variable modifications: Carbamidomethyl (C), Deamidated (NQ), Oxidation (M)

Cleavage by Trypsin: cuts C-term side of KR unless next residue is P

Sequence Coverage: 30%

Matched peptides shown in **Bold Red**

```
1 MRHLWLLLLL CVFSVQIQAA DDDYDEPTDS LDARGHRFVD RRKEEPPSLR
51 PAPPPISGGG YRARPAKATA NQKKVERRFP DAGGCLHADT DMGVLCPTGC
101 TLQQTLLNQE RPIKSSIAEL NNNIQSVSDT SSVTFQYLTL LKDMWKKKQA
151 QVKENENVIN EYSSILEDQR LYIDETVNDN IPLNLRVLR ILEDLRSKIQ
201 KLESDISAQM EYCRTPCTVS CNIPVVSQKE CEEIIRKGG TSEMYLIQPD
251 TSIKPYRVYC DMKTENGGWT VIQNRQDGSV DFGRKWDQYK KGFGNIATNE
301 DAKKYCGLPG EYWLGNDKIS QLTRMGFTEL LIEMEDWKGD KVKAHYGGFT
351 VQNEASKYQV SVNKYKGTAG NALMDGASQL VGENRTMTIH NGMFFSTYDR
401 DNDGWVTTDP RKQCSKEDGG GWWYNRCHAA NPNGRYYWGG LYSWDMSKHG
451 TDDGVVWMNW KGSWYSMRM SMKIRPFFPQ Q
```

Show predicted peptides also

Sort Peptides By

Residue Number  Increasing Mass  Decreasing Mass

| Start - End | Observed  | Mr(expt)  | Mr(calc)  | ppm | Miss | Sequence                                                                 |
|-------------|-----------|-----------|-----------|-----|------|--------------------------------------------------------------------------|
| 43 - 62     | 2105.2007 | 2104.1934 | 2104.1065 | 41  | 1    | R.KEEPPSLRPAPPPISGGGYR.A ( <a href="#">Ions score 19</a> )               |
| 44 - 62     | 1977.0981 | 1976.0908 | 1976.0116 | 40  | 0    | K.EEPPSLRPAPPPISGGGYR.A ( <a href="#">Ions score 17</a> )                |
| 154 - 170   | 2052.0364 | 2051.0291 | 2050.9443 | 41  | 0    | K.ENENVINEYSSILEDQR.L ( <a href="#">Ions score 51</a> )                  |
| 171 - 186   | 1902.0759 | 1901.0686 | 1900.9894 | 42  | 0    | R.LYIDETVNDNIPLNLR.V ( <a href="#">Ions score 42</a> )                   |
| 202 - 214   | 1601.7582 | 1600.7509 | 1600.6861 | 40  | 0    | R.LESDISAQMEYCR.T Carbamidomethyl (C) ( <a href="#">Ions score 15</a> )  |
| 237 - 257   | 2413.3040 | 2412.2967 | 2412.1995 | 40  | 1    | R.KGGETSEMYLIQPDTSIKPYR.V ( <a href="#">Ions score 70</a> )              |
| 264 - 275   | 1374.7316 | 1373.7243 | 1373.6688 | 40  | 0    | K.TENGGWTVIQNR.Q ( <a href="#">Ions score 22</a> )                       |
| 276 - 284   | 980.4769  | 979.4697  | 979.4359  | 34  | 0    | R.QDGSVDFGR.K ( <a href="#">Ions score 27</a> )                          |
| 305 - 318   | 1671.8080 | 1670.8007 | 1670.7399 | 36  | 0    | K.YCGLPGEYWLGNDK.I Carbamidomethyl (C) ( <a href="#">Ions score 15</a> ) |
| 417 - 426   | 1239.5681 | 1238.5608 | 1238.5105 | 41  | 0    | K.EDGGGWWYNR.C ( <a href="#">Ions score 6</a> )                          |
| 427 - 435   | 996.4788  | 995.4715  | 995.4355  | 36  | 0    | R.CHAANPNGR.Y Carbamidomethyl (C) ( <a href="#">Ions score 33</a> )      |
| 474 - 481   | 1032.5969 | 1031.5896 | 1031.5553 | 33  | 0    | K.IRPFFPQ.- ( <a href="#">Ions score 18</a> )                            |

# Sample M19

4700 Reflector Spec #1 MC=>NR(2.00)[BP = 1040.6, 44962]

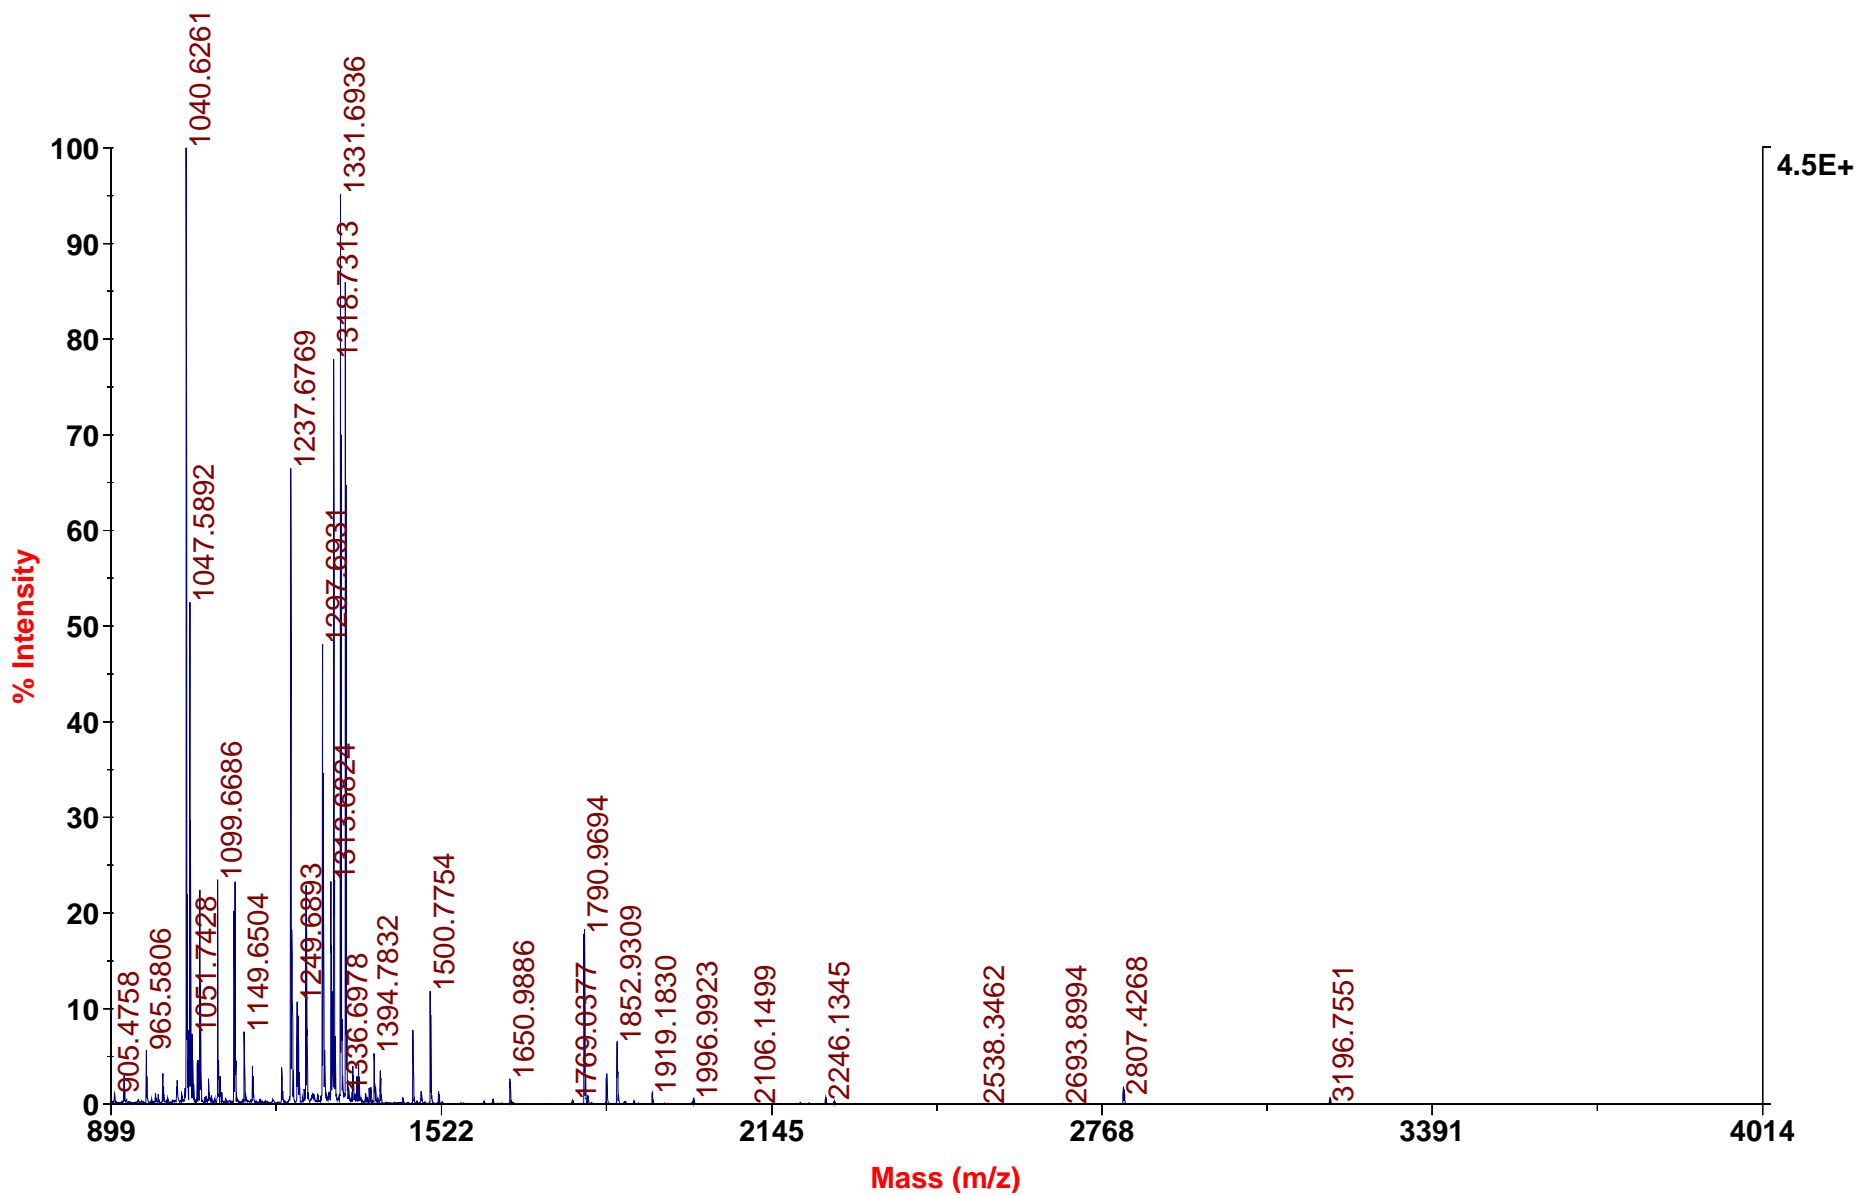

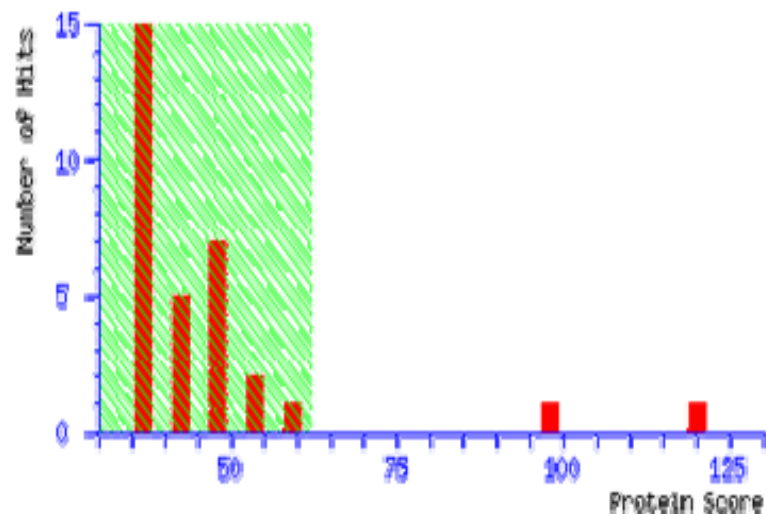

## Concise Protein Summary Report

Format As

Concise Protein Summary

[Help](#)

Significance threshold  $p <$

Max. number of hits

1. [Q3V2G1 MOUSE](#) **Mass:** 30666 **Score:** 120 **Expect:** 9.2e-08 **Matches:** 24

Adult male small intestine cdna, RIKEN full-length enriched library, clone:2010012G12 product:apolipoprotein A-I,

[JC1237](#) **Mass:** 30358 **Score:** 113 **Expect:** 4.6e-07 **Matches:** 22

apolipoprotein A-I precursor - mouse

[Q8BPD5 MOUSE](#) **Mass:** 30597 **Score:** 110 **Expect:** 9.2e-07 **Matches:** 23

18 days pregnant adult female placenta and extra embryonic tissue cdna, RIKEN full-length enriched library, clone:

[S22420](#) **Mass:** 30569 **Score:** 110 **Expect:** 9.2e-07 **Matches:** 22

apolipoprotein A-I precursor - mouse



## Protein View

Match to: Q3V2G1\_MOUSE Score: 120 Expect: 9.2e-08

Adult male small intestine cDNA, RIKEN full-length enriched library, clone:2010012G12 product:apolipoprotein

Found in search of pmf\_C6\_129990866002.txt

Nominal mass ( $M_r$ ): 30666; Calculated pI value: 5.64

NCBI BLAST search of [Q3V2G1\\_MOUSE](#) against nr

Unformatted [sequence string](#) for pasting into other applications

Taxonomy: [Mus musculus](#)

Links to retrieve other entries containing this sequence from NCBI Entrez:  
(no taxonomy information for this entry)

Variable modifications: Carbamidomethyl (C), Deamidated (NQ), Oxidation (M)

Cleavage by Trypsin: cuts C-term side of KR unless next residue is P

Number of mass values searched: 147

Number of mass values matched: 24

Sequence Coverage: 60%

Matched peptides shown in **Bold Red**

```
1 MKAVVLAVAL VFLTGRQAWH VVQQDEPQSQ WDKVKDFANV YDAVKDSGR
51 DYVSQFESS LGQQNLNLL ENWDTLGSTV SQLQERLGPL TRDFWDNLEK
101 ETDWRQEMN KDLEEVKQKV QPYLDEFQKK WKEDVELYRQ KVAPLGAELO
151 ESARQKLQEL QGRSLPVAEE FRDRMRTHVD SLRTQLAPHS EQMRESLAQR
201 LAELKSNPTL NEYHTRAKTH LKTLGEEKARP ALEDLRHSLM PMLETCLKTQV
251 QSVIDKASET LTAQ
```

Show predicted peptides also

Sort Peptides By

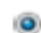

Residue Number

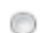

Increasing Mass

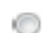

Decreasing Mass

| Start | End | Observed  | Mr(expt)  | Mr(calc)  | ppm | Miss | Sequence                      |                   |
|-------|-----|-----------|-----------|-----------|-----|------|-------------------------------|-------------------|
| 17    | 33  | 2198.1162 | 2197.1089 | 2196.9501 | 72  | 0    | <b>R. QAWHVWQQDEPQSQWDK.V</b> | 2 Deamidated (NQ) |
| 34    | 46  | 1467.8397 | 1466.8324 | 1466.7769 | 38  | 1    | <b>K. VKDFANVYVDAVK.D</b>     |                   |
| 36    | 46  | 1240.6721 | 1239.6648 | 1239.6136 | 41  | 0    | <b>K. DFANVYVDAVK.D</b>       |                   |
| 36    | 50  | 1655.8489 | 1654.8416 | 1654.7951 | 28  | 1    | <b>K. DFANVYVDAVKDSGR.D</b>   |                   |
| 93    | 100 | 1066.5186 | 1065.5113 | 1065.4767 | 32  | 0    | <b>R. DFWDNLEK.E</b>          |                   |
| 93    | 106 | 1852.9277 | 1851.9204 | 1851.8428 | 42  | 1    | <b>R. DFWDNLEKETDWVR.Q</b>    |                   |
| 107   | 117 | 1362.7241 | 1361.7168 | 1361.6496 | 49  | 1    | <b>R. QEMNKDLEEVK.Q</b>       |                   |
| 107   | 117 | 1378.7196 | 1377.7123 | 1377.6446 | 49  | 1    | <b>R. QEMNKDLEEVK.Q</b>       | Oxidation (M)     |
| 120   | 129 | 1266.6832 | 1265.6759 | 1265.6292 | 37  | 0    | <b>K. VQPYLDEFQK.K</b>        |                   |
| 120   | 130 | 1394.7819 | 1393.7746 | 1393.7242 | 36  | 1    | <b>K. VQPYLDEFQKK.W</b>       |                   |
| 131   | 139 | 1237.6746 | 1236.6673 | 1236.6139 | 43  | 1    | <b>K. WKEDVELYR.Q</b>         |                   |
| 133   | 139 | 923.4918  | 922.4845  | 922.4396  | 49  | 0    | <b>K. EDVELYR.Q</b>           |                   |



# M19

4700 MS/MS Precursor 1040.63 Spec #1 MC[BP = 884.4, 8838]

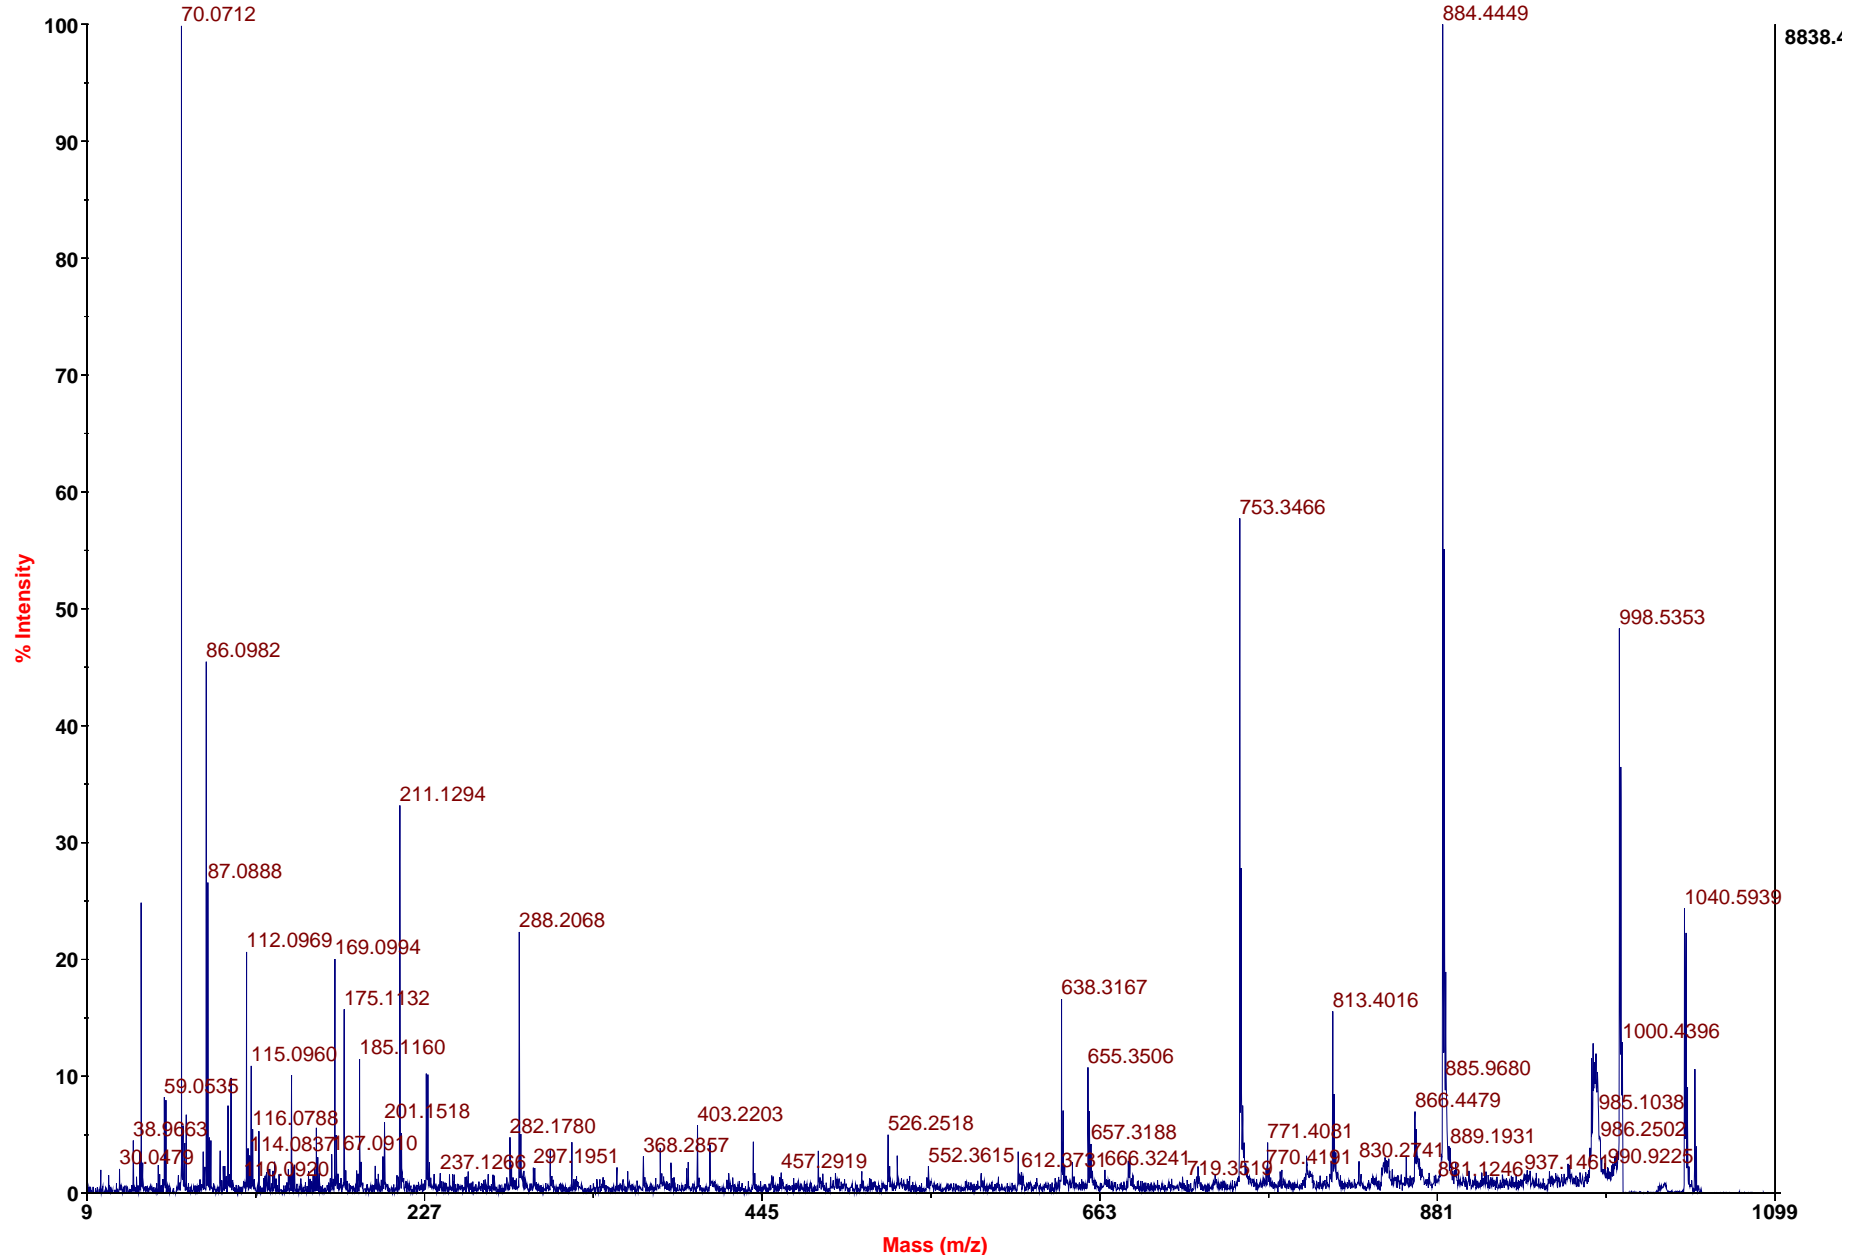

# M19

4700 MS/MS Precursor 1340.78 Spec #1 MC[BP = 70.1, 10449]

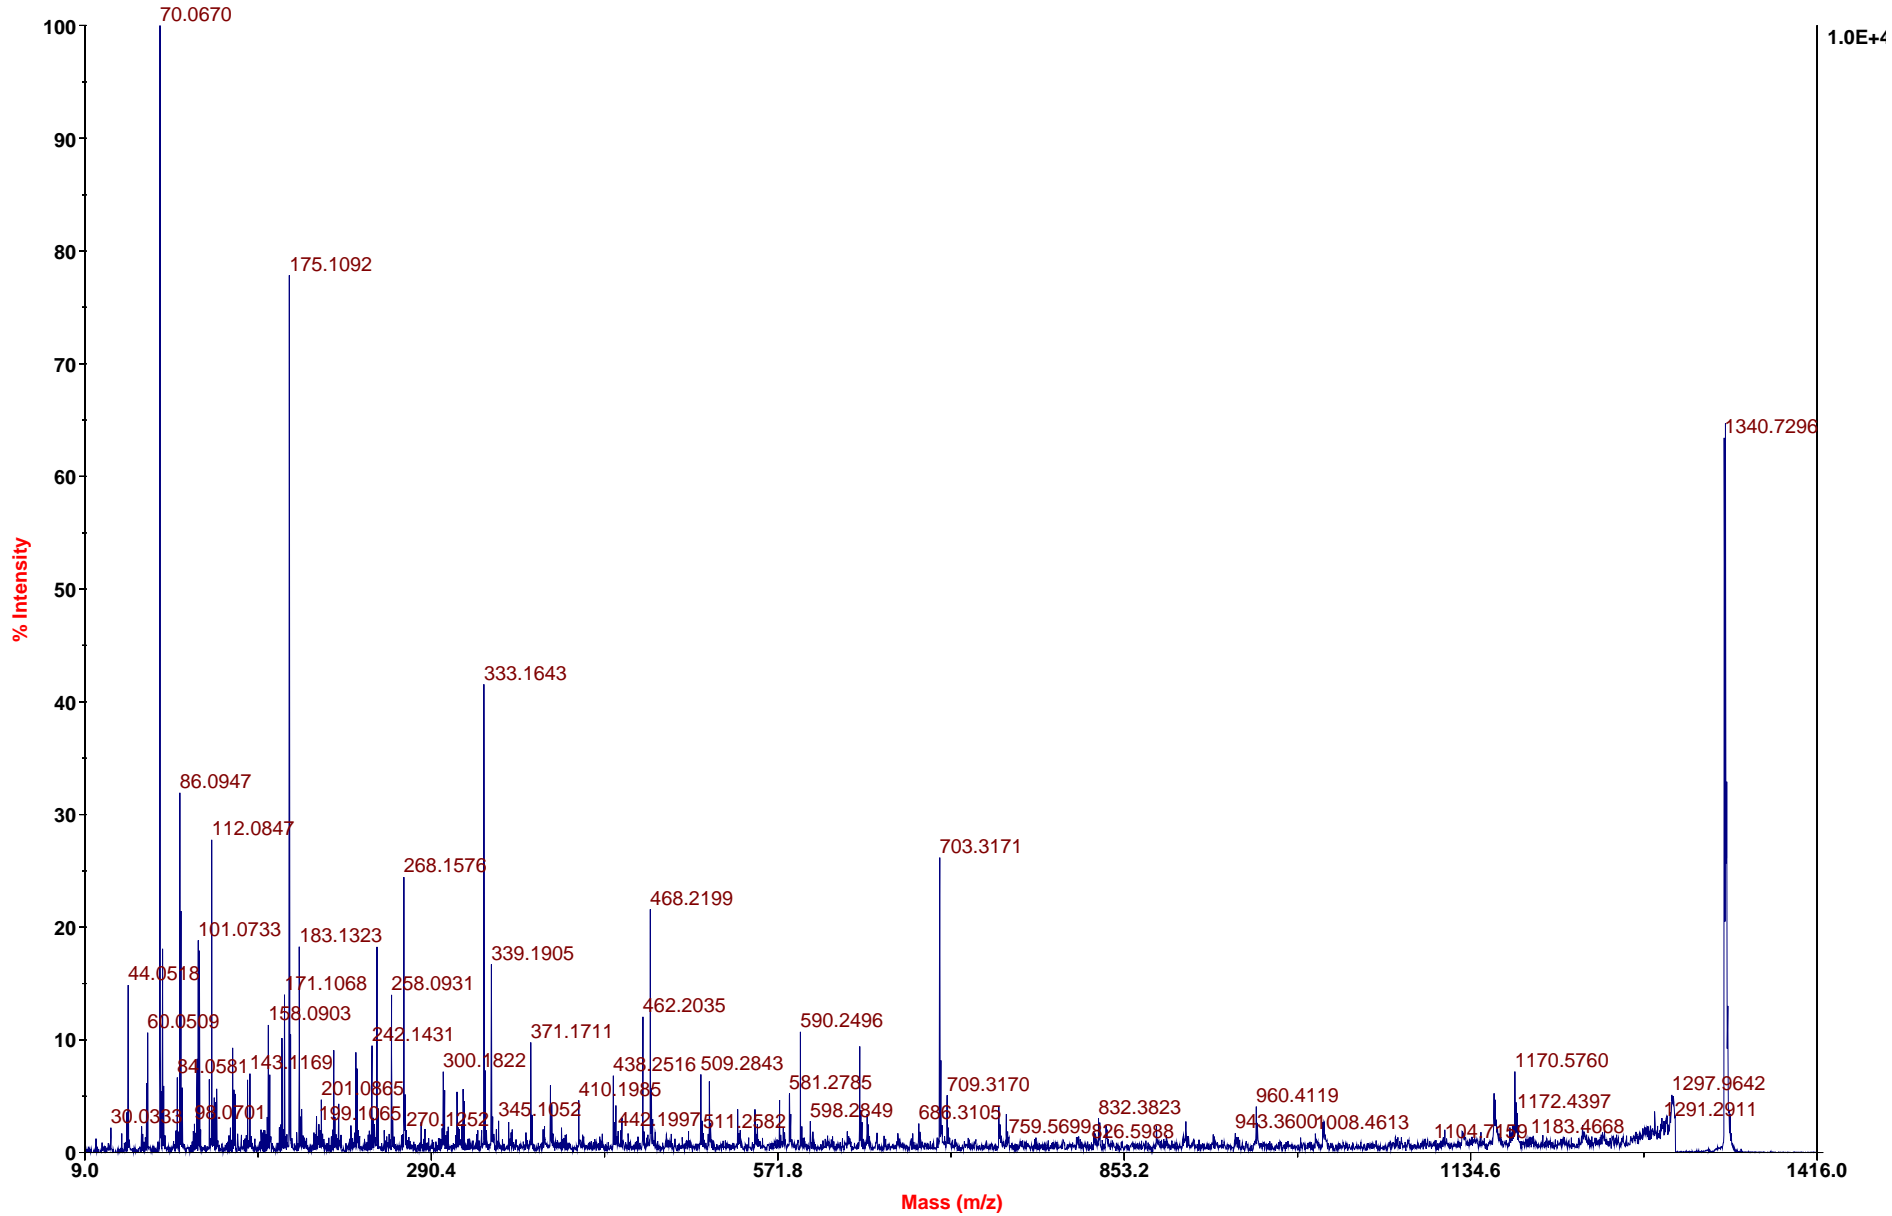

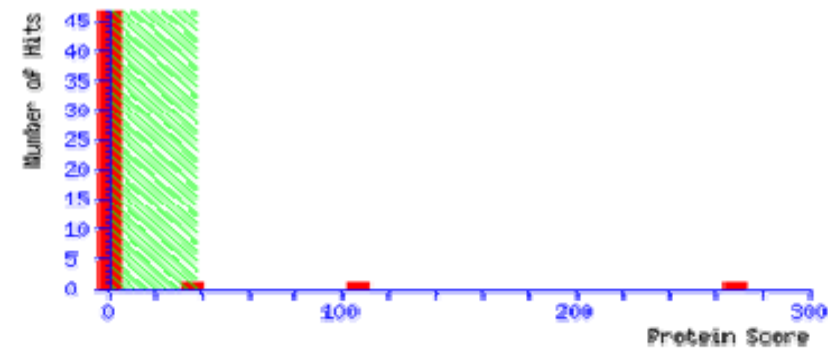

## Peptide Summary Report

Format As Peptide Summary

[Help](#)

Significance threshold  $p <$

Max. number of hits

Standard scoring  MudPIT scoring

Ions score or expect cut-off

Show sub-sets

Show pop-ups  Suppress pop-ups

Sort unassigned

Require bold red

Error tolerant

1. [Q3V2G1\\_MOUSE](#) Mass: 30666 Score: 268 Matches: 12(9) Sequences: 12(9) emPAI: 5.37

Adult male small intestine cDNA, RIKEN full-length enriched library, clone:2010012G12 product:apolipoprotein A

Check to include this hit in error tolerant search

| Query                                                  | Observed  | Mr(expt)  | Mr(calc)  | ppm  | Miss | Score | Expect  | Rank | Unique | Peptide           |
|--------------------------------------------------------|-----------|-----------|-----------|------|------|-------|---------|------|--------|-------------------|
| <input checked="" type="checkbox"/> <a href="#">2</a>  | 1040.6257 | 1039.6184 | 1039.5774 | 39.5 | 0    | 17    | 2.7     | 1    | U      | K.ARPALEDLR.H     |
| <input checked="" type="checkbox"/> <a href="#">3</a>  | 1047.5887 | 1046.5814 | 1046.5396 | 39.9 | 0    | 31    | 0.24    | 1    | U      | R.LSPVAEEFR.D     |
| <input checked="" type="checkbox"/> <a href="#">4</a>  | 1099.6685 | 1098.6612 | 1098.6145 | 42.5 | 1    | 39    | 0.019   | 1    | U      | R.QKLQELQGR.L     |
| <input checked="" type="checkbox"/> <a href="#">8</a>  | 1237.6746 | 1236.6673 | 1236.6139 | 43.2 | 1    | 64    | 0.0001  | 1    | U      | K.WKEDVELYR.Q     |
| <input checked="" type="checkbox"/> <a href="#">10</a> | 1266.6832 | 1265.6759 | 1265.6292 | 36.9 | 0    | 40    | 0.029   | 1    | U      | K.VQPYLDEFQK.K    |
| <input checked="" type="checkbox"/> <a href="#">11</a> | 1297.6907 | 1296.6834 | 1296.6245 | 45.5 | 0    | 45    | 0.01    | 1    | U      | R.TQLAPHSEQMR.E   |
| <input checked="" type="checkbox"/> <a href="#">12</a> | 1318.7311 | 1317.7238 | 1317.6677 | 42.6 | 1    | 23    | 1.6     | 1    | U      | R.LSPVAEEFRDR.M   |
| <input checked="" type="checkbox"/> <a href="#">13</a> | 1331.6930 | 1330.6857 | 1330.6266 | 44.5 | 0    | 56    | 0.00071 | 1    | U      | K.SNPTLNEYHTR.A   |
| <input checked="" type="checkbox"/> <a href="#">14</a> | 1340.7750 | 1339.7677 | 1339.7095 | 43.4 | 0    | 48    | 0.0033  | 1    | U      | K.VAPLGAELQESAR.Q |
| <input checked="" type="checkbox"/> <a href="#">16</a> | 1394.7819 | 1393.7746 | 1393.7242 | 36.2 | 1    | 38    | 0.041   | 1    | U      | K.VQPYLDEFQKK.W   |
| <input checked="" type="checkbox"/> <a href="#">17</a> | 1467.8397 | 1466.8324 | 1466.7769 | 37.8 | 1    | 86    | 5.6e-07 | 1    | U      | K.VKDFANVYVDAVK.D |
| <input checked="" type="checkbox"/> <a href="#">23</a> | 1852.9277 | 1851.9204 | 1851.8428 | 41.9 | 1    | 80    | 3.4e-06 | 1    | U      | R.DFDNLEKETDWVR.Q |

## Protein View

Match to: Q3V2G1\_MOUSE score: 268

Adult male small intestine cDNA, RIKEN full-length enriched library, clone:2010012G12 product:apolipoprotein A-I,  
Found in search of ppw\_C6\_129990871602.txt

Nominal mass ( $M_r$ ): 30666; Calculated pI value: 5.64

NCBI BLAST search of [Q3V2G1\\_MOUSE](#) against nr

Unformatted [sequence string](#) for pasting into other applications

Taxonomy: [Mus musculus](#)

Links to retrieve other entries containing this sequence from NCBI Entrez:  
(no taxonomy information for this entry)

Variable modifications: Carbamidomethyl (C), Deamidated (NQ), Oxidation (M)

Cleavage by Trypsin: cuts C-term side of KR unless next residue is P

Sequence Coverage: 42%

Matched peptides shown in **Bold Red**

```
1 MKAVVLAVAL VFLTGRQAWH VWQQDEPQSQ WDKVKDFANV YDAVKDSGR
51 DYVSQFESS LGQQLNLNLL ENWDTLGSTV SQLQERLGPL TRDFWNLEK
101 ETDWRQEMN KDLEEVKQKV QPYLDEFQKK WKEDVELYRQ KVAPLGAELQ
151 ESARQKLQEL QGRLSPVAEE FRDRMRTHVD SLRTQLAPHS EQMRESLAQR
201 LAELKSNPTL NEYHTRAKTH LKTLGEKARP ALEDLRHSLM PMLETLKTQV
251 QSVIDKASET LTAQ
```

Show predicted peptides also

Sort Peptides By

Residue Number  Increasing Mass  Decreasing Mass

| Start - End | Observed  | Mr(expt)  | Mr(calc)  | ppm | Miss | Sequence                                                   |
|-------------|-----------|-----------|-----------|-----|------|------------------------------------------------------------|
| 34 - 46     | 1467.8397 | 1466.8324 | 1466.7769 | 38  | 1    | <b>K.VKDFANVYDAVK.D</b> ( <a href="#">Ions score 86</a> )  |
| 93 - 106    | 1852.9277 | 1851.9204 | 1851.8428 | 42  | 1    | <b>R.DFDNLEKETDWRV.R</b> ( <a href="#">Ions score 80</a> ) |
| 120 - 129   | 1266.6832 | 1265.6759 | 1265.6292 | 37  | 0    | <b>K.VQPYLDEFQK.K</b> ( <a href="#">Ions score 40</a> )    |
| 120 - 130   | 1394.7819 | 1393.7746 | 1393.7242 | 36  | 1    | <b>K.VQPYLDEFQKK.W</b> ( <a href="#">Ions score 38</a> )   |
| 131 - 139   | 1237.6746 | 1236.6673 | 1236.6139 | 43  | 1    | <b>K.WKEDVELYR.Q</b> ( <a href="#">Ions score 64</a> )     |
| 142 - 154   | 1340.7750 | 1339.7677 | 1339.7095 | 43  | 0    | <b>K.VAPLGAELQESAR.Q</b> ( <a href="#">Ions score 48</a> ) |
| 155 - 163   | 1099.6685 | 1098.6612 | 1098.6145 | 43  | 1    | <b>R.QKLQELQGR.L</b> ( <a href="#">Ions score 39</a> )     |
| 164 - 172   | 1047.5887 | 1046.5814 | 1046.5396 | 40  | 0    | <b>R.LSPVAEEFR.D</b> ( <a href="#">Ions score 31</a> )     |
| 164 - 174   | 1318.7311 | 1317.7238 | 1317.6677 | 43  | 1    | <b>R.LSPVAEEFRDR.M</b> ( <a href="#">Ions score 23</a> )   |
| 184 - 194   | 1297.6907 | 1296.6834 | 1296.6245 | 45  | 0    | <b>R.TQLAPHSEQMR.E</b> ( <a href="#">Ions score 45</a> )   |
| 206 - 216   | 1331.6930 | 1330.6857 | 1330.6266 | 44  | 0    | <b>K.SNPTLNEYHTR.A</b> ( <a href="#">Ions score 56</a> )   |
| 228 - 236   | 1040.6257 | 1039.6184 | 1039.5774 | 39  | 0    | <b>K.ARPALDLR.H</b> ( <a href="#">Ions score 17</a> )      |

Sample M20

4700 Reflector Spec #1 MC=>NR(2.00)[BP = 906.5, 19962]

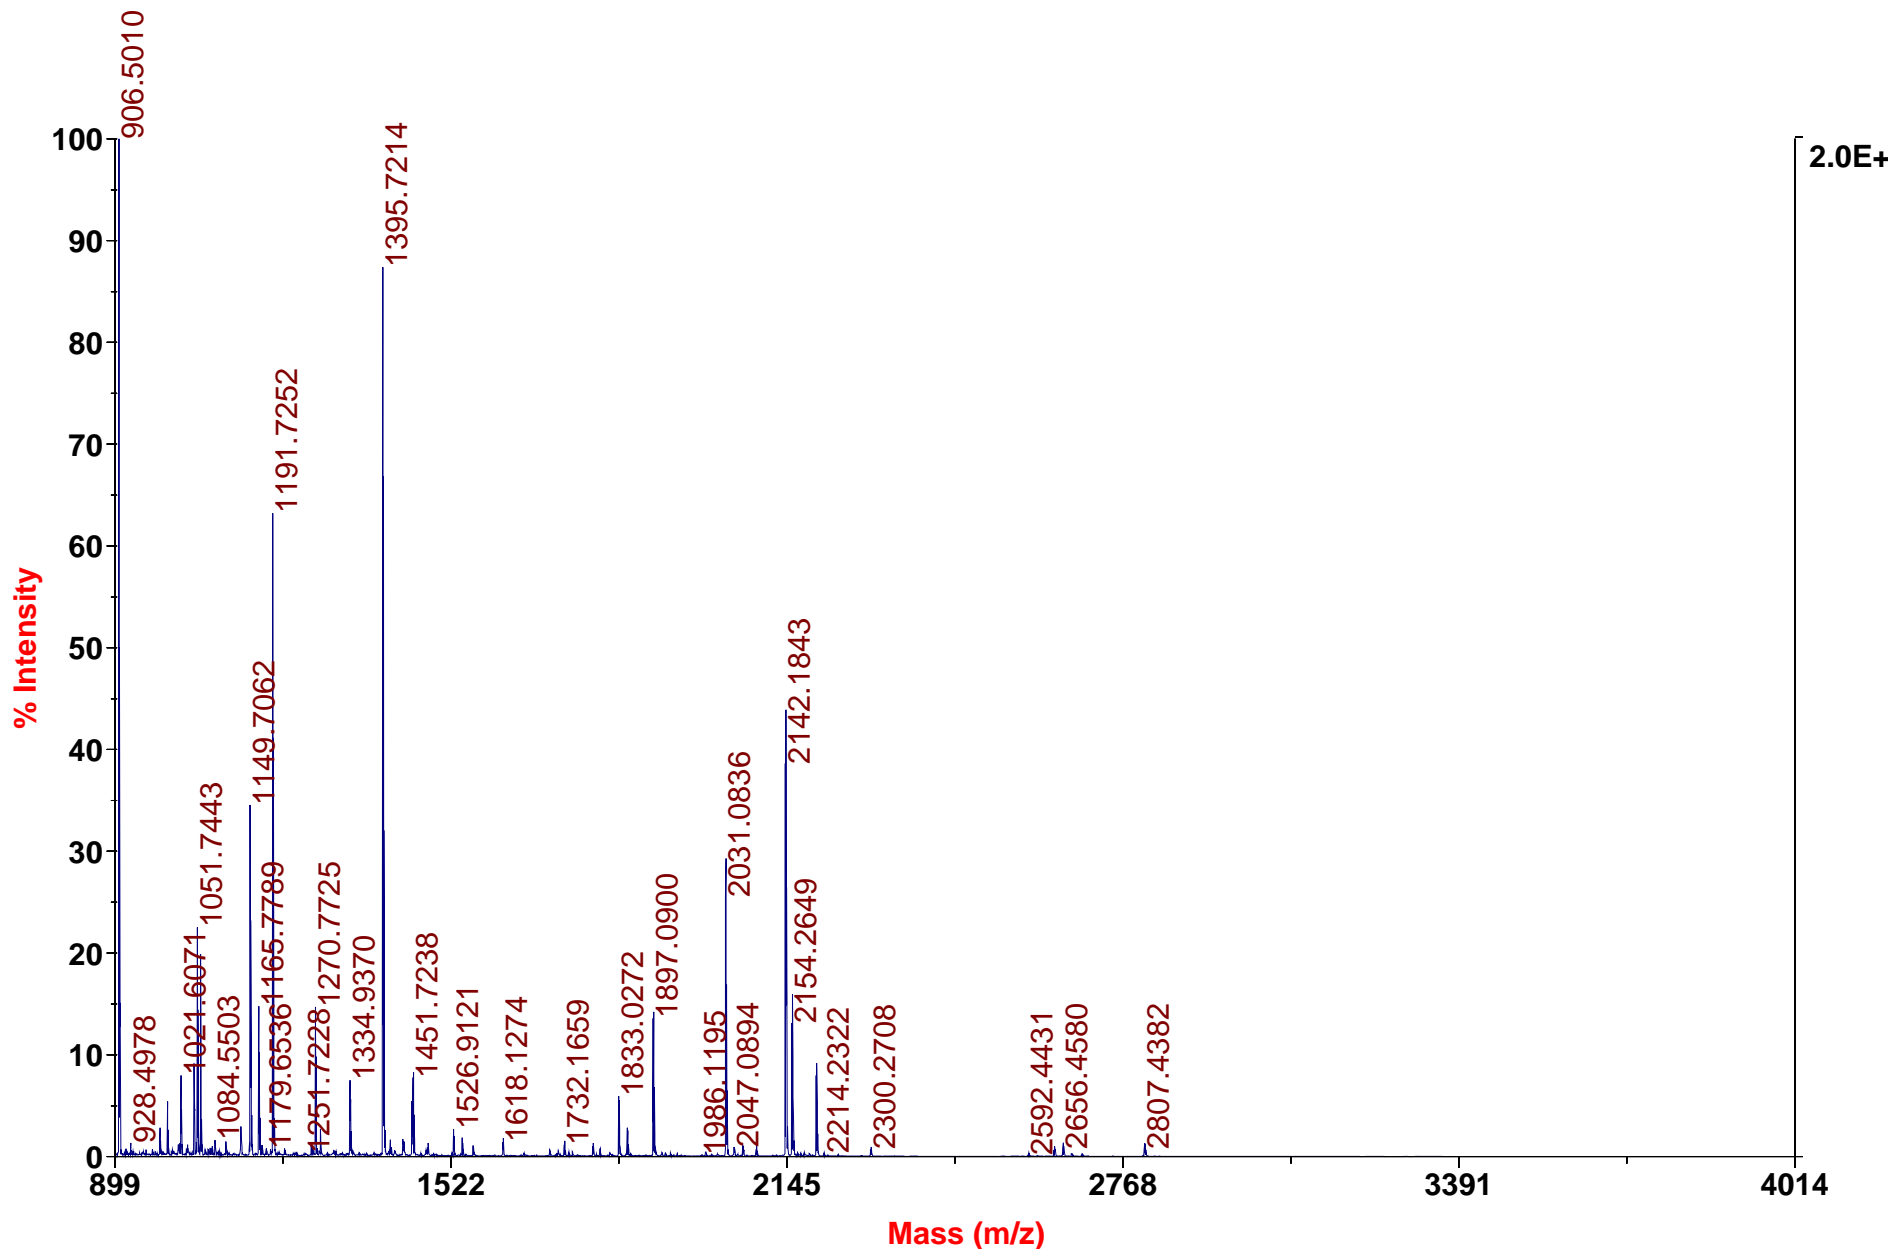

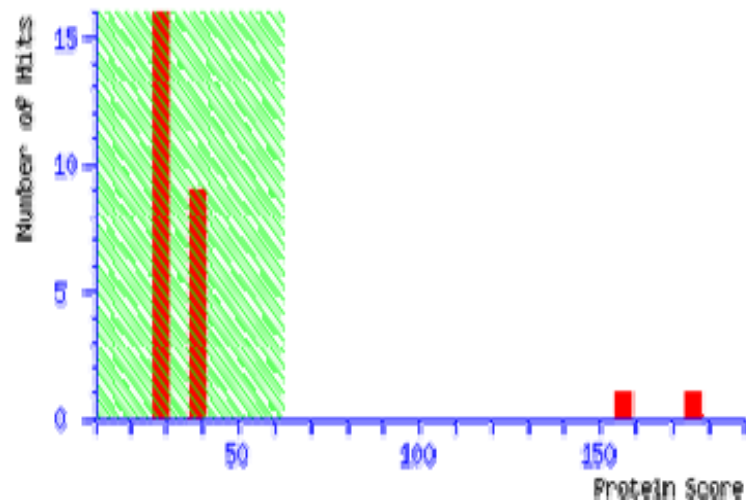

## Concise Protein Summary Report

Format As

Concise Protein Summary

[Help](#)

Significance threshold  $p <$

Max. number of hits

- [PRDX6 MOUSE](#)    **Mass:** 24724    **Score:** 176    **Expect:** 2.3e-13    **Matches:** 30  
 Peroxiredoxin-6 (EC 1.11.1.15) (Antioxidant protein 2) (1-Cys peroxiredoxin) (1-Cys PRX) (Acidic calcium-independent p

[Q53ZU7 MOUSE](#)    **Mass:** 24855    **Score:** 176    **Expect:** 2.3e-13    **Matches:** 30  
 Peroxiredoxin 6 (CRL-1722 L5178Y-R cDNA, RIKEN full-length enriched library, clone:I730069G09 product:peroxiredoxin 6,

[AAD03716](#)    **Mass:** 24825    **Score:** 162    **Expect:** 5.8e-12    **Matches:** 28  
 MMCYSP4 NID: - Mus musculus

[AAC67553](#)    **Mass:** 24885    **Score:** 148    **Expect:** 1.5e-10    **Matches:** 28  
 AF093853 NID: - Mus musculus

## Protein View

Match to: PRDX6\_MOUSE Score: 176 Expect: 2.3e-13

Peroxiredoxin-6 (EC 1.11.1.15) (Antioxidant protein 2) (1-Cys peroxiredoxin) (1-Cys PRX) (Acidic calci  
Found in search of pmf\_D6\_129990866103.txt

Nominal mass ( $M_r$ ): 24724; Calculated pI value: 5.72

NCBI BLAST search of [PRDX6\\_MOUSE](#) against nr

Unformatted [sequence string](#) for pasting into other applications

Taxonomy: [Mus musculus](#)

Variable modifications: Carbamidomethyl (C), Deamidated (NQ), Oxidation (M)

Cleavage by Trypsin: cuts C-term side of KR unless next residue is P

Number of mass values searched: 119

Number of mass values matched: 30

Sequence Coverage: 88%

Matched peptides shown in **Bold Red**

```
1  PGGLLLGDEA PNFEANTTIG RIRFHDFLGD SWGILFSHPR DFTPVCTTEL
51 GRAAKLAPEF AKRNVKLIAL SIDSVEDHLA WSKDINAYNG ETPTEKLPEP
101 IIDDKGRDLA ILLGMLDPVE KDDNNMPVTA RVVFIFGPKD KLKLSILYPA
151 TTGRNFLDEIL RVVDSLQLTG TKPVATPVDW KKGESVMVVP TLSEEEAKQC
201 FPKGVFTKEL PSGKKYLRYT PQP
```

Show predicted peptides also

Sort Peptides By

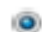

Residue Number

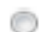

Increasing Mass

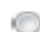

Decreasing Mass

| Start | End | Observed  | Mr(expt)  | Mr(calc)  | ppm | Miss | Sequence                                     |
|-------|-----|-----------|-----------|-----------|-----|------|----------------------------------------------|
| 1     | 21  | 2142.1814 | 2141.1741 | 2141.0753 | 46  | 0    | <b>-. PGGLLLGDEAPNFEANTTIGR.I</b>            |
| 22    | 40  | 2300.2776 | 2299.2703 | 2299.1651 | 46  | 1    | <b>R. IRFHDFLGDSWGILFSHPR.D</b>              |
| 24    | 40  | 2031.0808 | 2030.0735 | 2029.9799 | 46  | 0    | <b>R. FHFDFLGDSWGILFSHPR.D</b>               |
| 41    | 52  | 1338.7070 | 1337.6997 | 1337.6286 | 53  | 0    | <b>R. DFTPVCTTELGR.A</b>                     |
| 41    | 52  | 1395.7209 | 1394.7136 | 1394.6500 | 46  | 0    | <b>R. DFTPVCTTELGR.A</b> Carbamidomethyl (C) |
| 53    | 62  | 1045.6050 | 1044.5977 | 1044.5967 | 1   | 1    | <b>R. AAKLAPEFAK.R</b>                       |
| 64    | 83  | 2239.2366 | 2238.2293 | 2238.1896 | 18  | 1    | <b>R. NVKLIALSIDSVEDHLAWSK.D</b> Deamidated  |
| 67    | 83  | 1897.0906 | 1896.0833 | 1895.9993 | 44  | 0    | <b>K. LIALSIDSVEDHLAWSK.D</b>                |
| 84    | 96  | 1451.7247 | 1450.7174 | 1450.6576 | 41  | 0    | <b>K. DINAYNGETPTEK.L</b>                    |
| 97    | 105 | 1057.6310 | 1056.6237 | 1056.5855 | 36  | 0    | <b>K. LPFPIIDDK.G</b>                        |
| 97    | 107 | 1270.7704 | 1269.7631 | 1269.7081 | 43  | 1    | <b>K. LPFPIIDDKGR.D</b>                      |
| 106   | 121 | 1740.0472 | 1739.0399 | 1738.9651 | 43  | 1    | <b>K. GRDLAILLGMLDPVEK.D</b>                 |
| 108   | 121 | 1526.9110 | 1525.9037 | 1525.8425 | 40  | 0    | <b>R. DLAILLGMMLDPVEK.D</b>                  |
| 108   | 121 | 1542.9082 | 1541.9009 | 1541.8375 | 41  | 0    | <b>R. DLAILLGMMLDPVEK.D</b> Oxidation (M)    |

# M20

4700 MS/MS Precursor 906.502 Spec #1 MC[BP = 175.1, 3389]

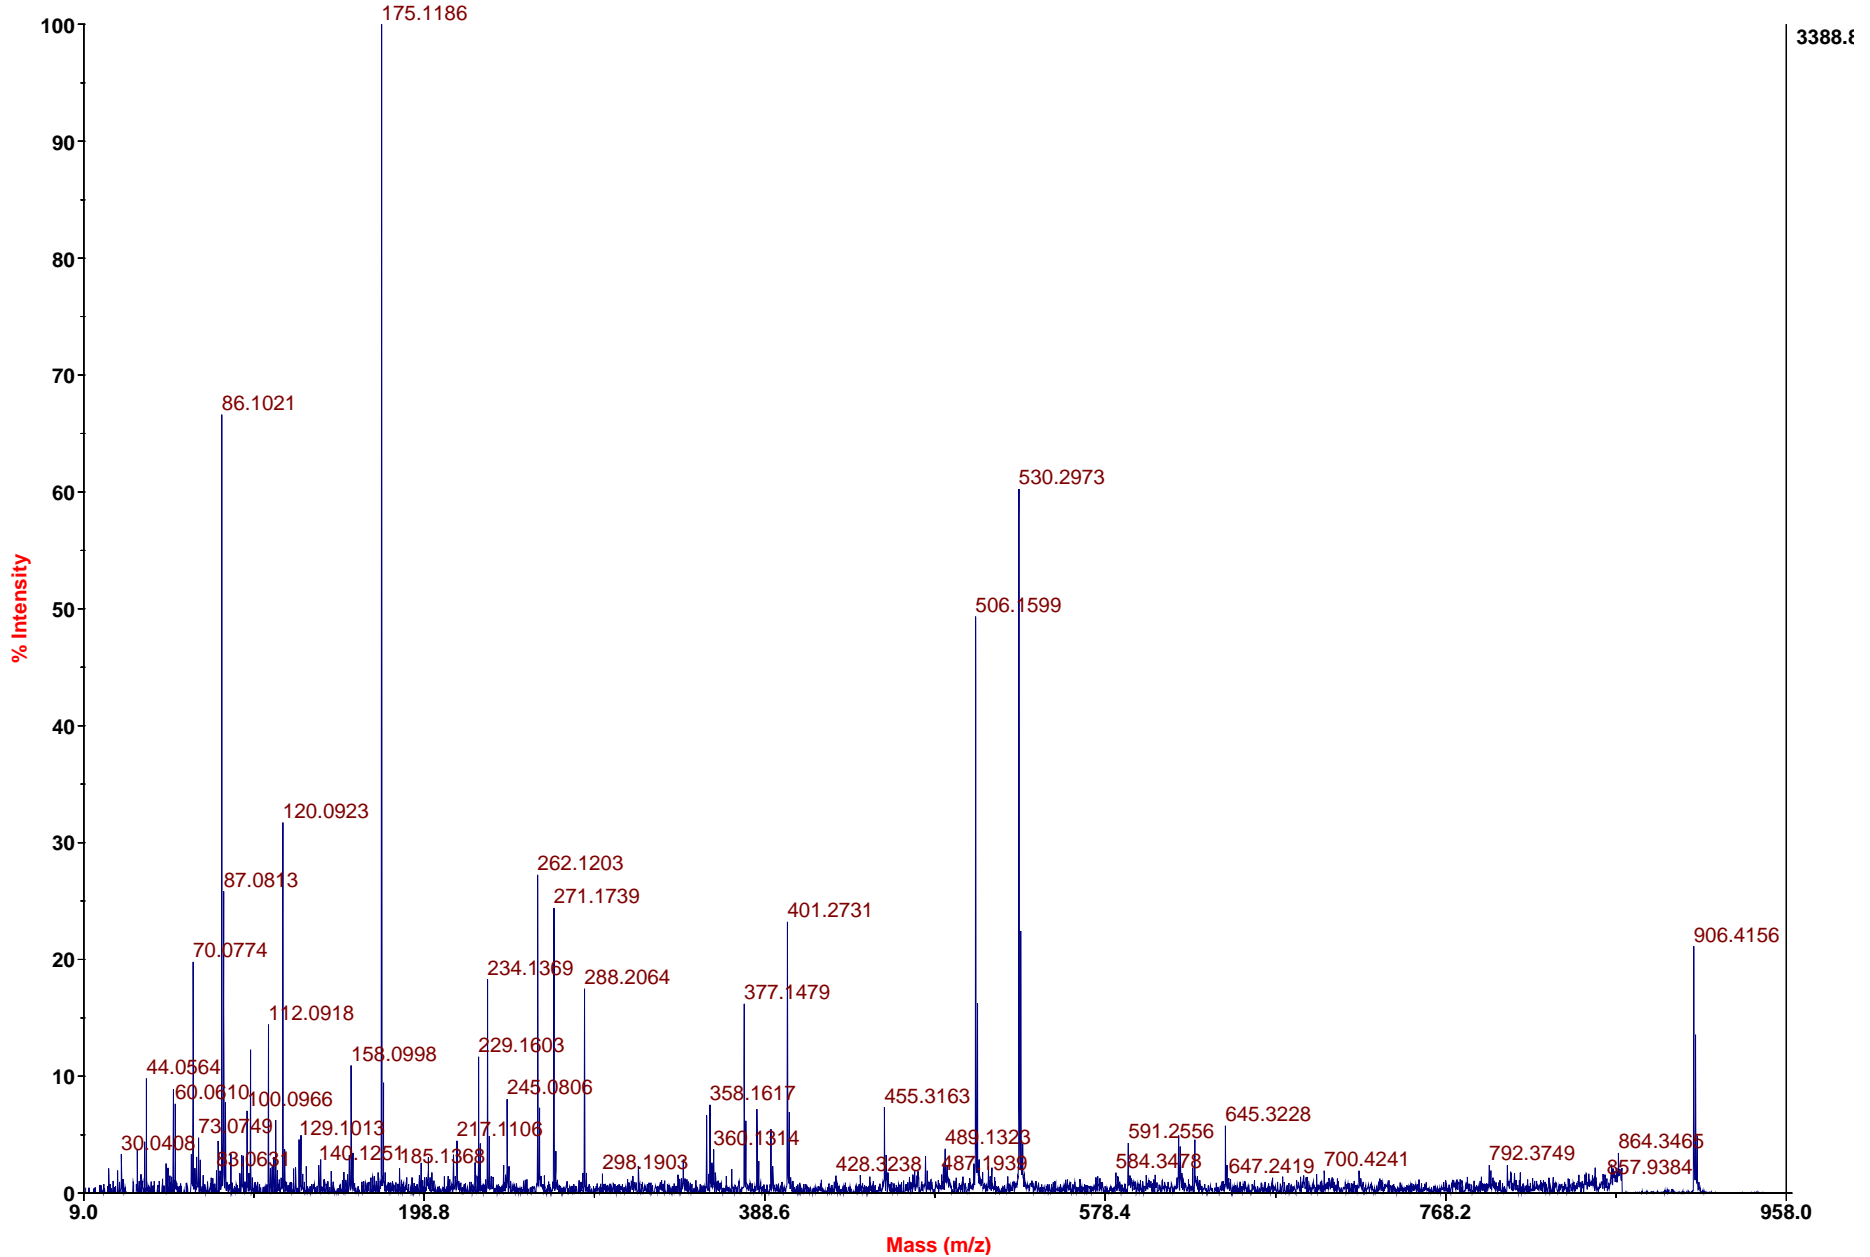



# M20

4700 MS/MS Precursor 1149.7 Spec #1 MC[BP = 544.3, 2164]

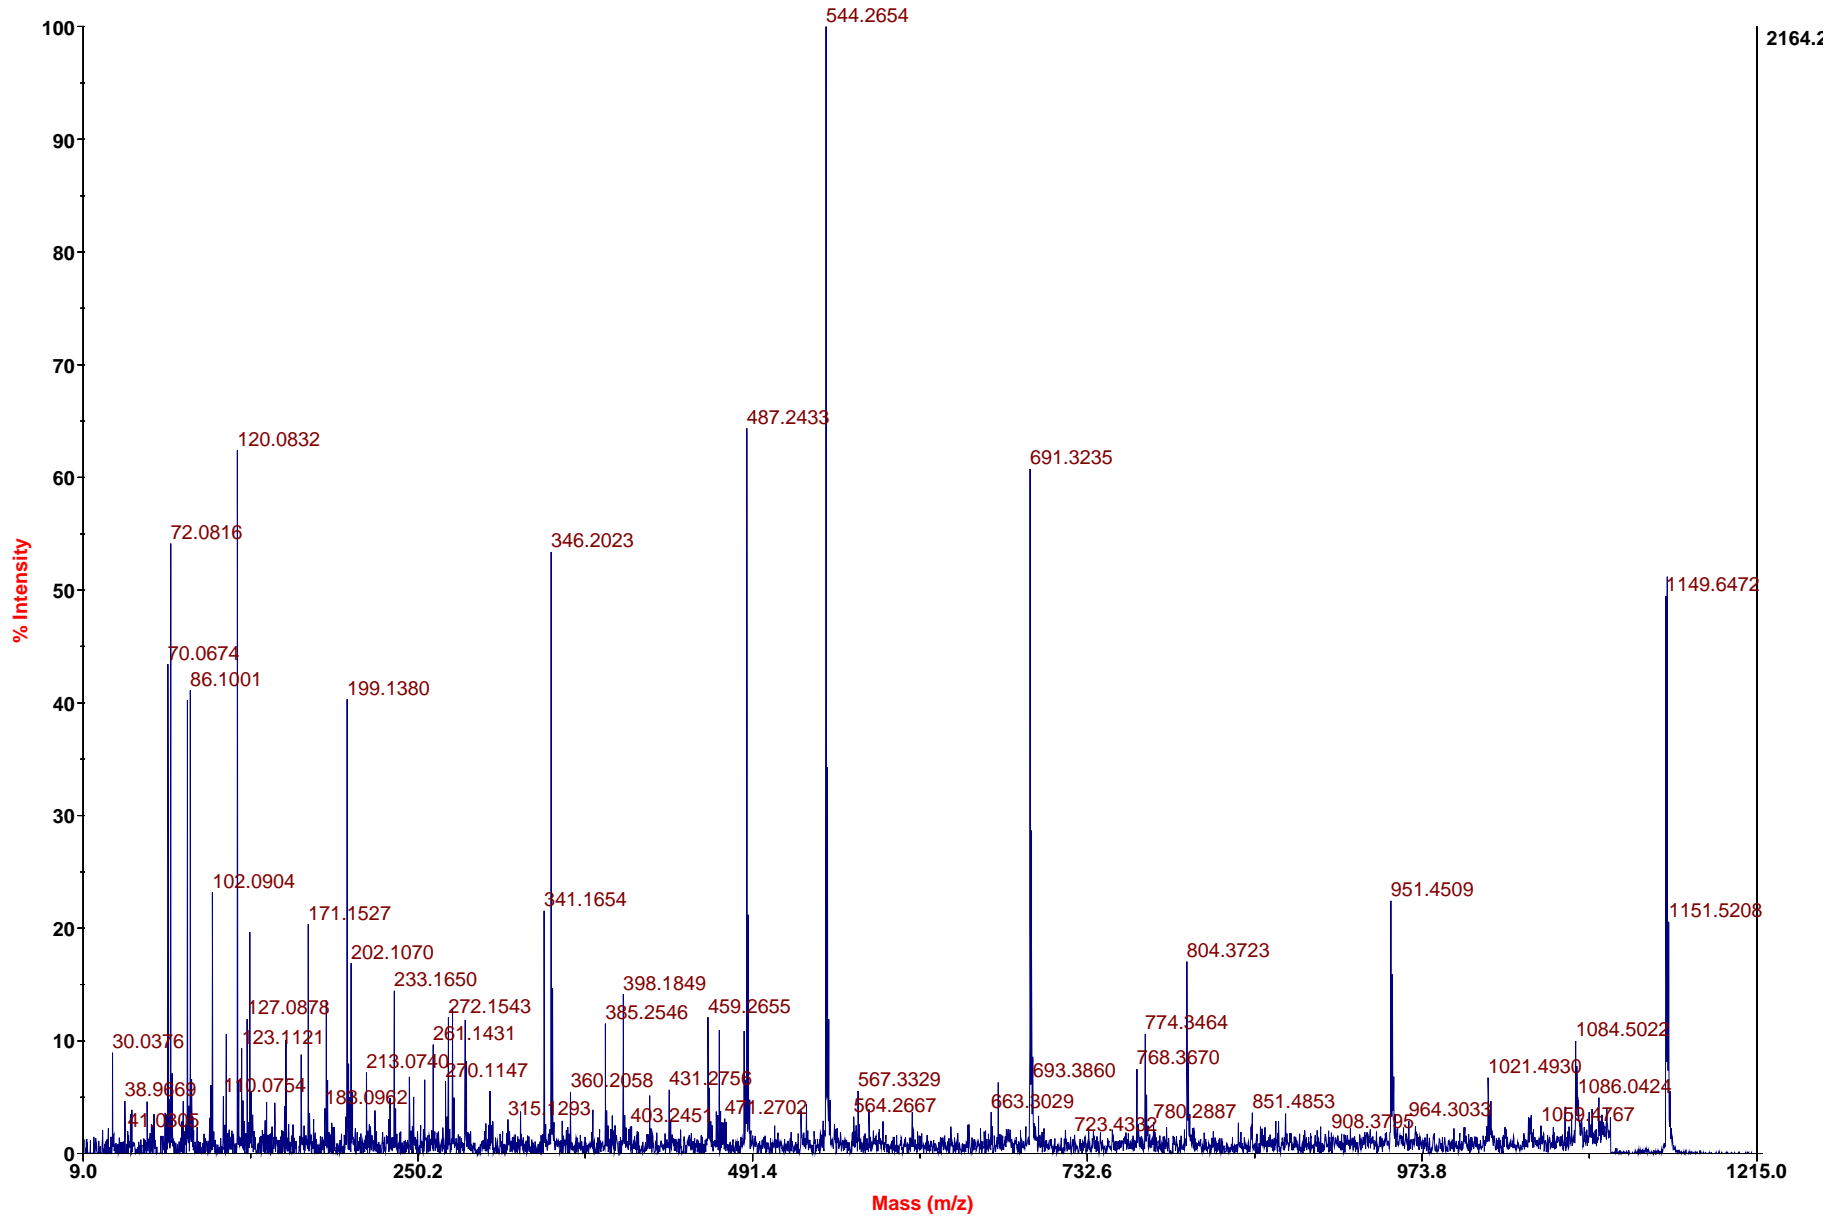

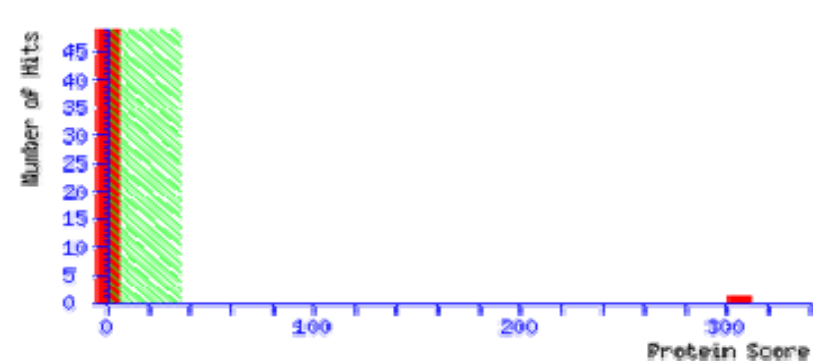

## Peptide Summary Report

Format As Peptide Summary

[Help](#)

Significance threshold  $p <$

Max. number of hits

Standard scoring  MudPIT scoring  Ions score or expect cut-off

Show sub-sets

Show pop-ups  Suppress pop-ups  Sort unassigned

Require bold red

Select All

Select None

Search Selected

Error tolerant

1. [PRDX6\\_MOUSE](#) Mass: 24724 Score: 306 Matches: 13(11) Sequences: 13(11) emPAI: 17.46

Peroxiredoxin-6 (EC 1.11.1.15) (Antioxidant protein 2) (1-Cys peroxiredoxin) (1-Cys PRX) (Acidic calcium-inducible)

Check to include this hit in error tolerant search

| Query                                                  | Observed  | Mr(expt)  | Mr(calc)  | ppm  | Miss | Score | Expect  | Rank | Unique | Peptide                                           |
|--------------------------------------------------------|-----------|-----------|-----------|------|------|-------|---------|------|--------|---------------------------------------------------|
| <input checked="" type="checkbox"/> <a href="#">1</a>  | 906.5024  | 905.4952  | 905.4607  | 38.1 | 0    | 40    | 0.031   | 1    | U      | R.NFDEILR.V                                       |
| <input checked="" type="checkbox"/> <a href="#">4</a>  | 1021.6072 | 1020.5999 | 1020.5644 | 34.8 | 0    | 43    | 0.0088  | 1    | U      | R.VVFIFGPK.K                                      |
| <input checked="" type="checkbox"/> <a href="#">7</a>  | 1057.6310 | 1056.6237 | 1056.5855 | 36.1 | 0    | 59    | 0.00024 | 1    | U      | K.LPFPIIDDK.G                                     |
| <input checked="" type="checkbox"/> <a href="#">8</a>  | 1149.7048 | 1148.6975 | 1148.6594 | 33.2 | 1    | 35    | 0.044   | 1    | U      | R.VVFIFGPK.K                                      |
| <input checked="" type="checkbox"/> <a href="#">9</a>  | 1191.7252 | 1190.7179 | 1190.6659 | 43.7 | 0    | 36    | 0.034   | 1    | U      | K.LSILYPATTGR.N                                   |
| <input checked="" type="checkbox"/> <a href="#">10</a> | 1270.7704 | 1269.7631 | 1269.7081 | 43.3 | 1    | 42    | 0.0098  | 1    | U      | K.LPFPIIDDKGR.D                                   |
| <input checked="" type="checkbox"/> <a href="#">12</a> | 1395.7209 | 1394.7136 | 1394.6500 | 45.6 | 0    | 71    | 2.3e-05 | 1    | U      | R.DFTPVC <sup>u</sup> TTTELGR.A + Carbamidomethyl |
| <input checked="" type="checkbox"/> <a href="#">13</a> | 1451.7247 | 1450.7174 | 1450.6576 | 41.3 | 0    | 45    | 0.0095  | 1    | U      | K.DINAYNGETPTEK.L                                 |
| <input checked="" type="checkbox"/> <a href="#">15</a> | 1833.0288 | 1832.0215 | 1831.9237 | 53.4 | 1    | 24    | 0.94    | 1    | U      | K.KGESVMVVPTLSEEEAK.Q                             |
| <input checked="" type="checkbox"/> <a href="#">19</a> | 1897.0906 | 1896.0833 | 1895.9993 | 44.3 | 0    | 72    | 1.2e-05 | 1    | U      | K.LIALSIDSVEDHLAWSK.D                             |
| <input checked="" type="checkbox"/> <a href="#">26</a> | 2031.0808 | 2030.0735 | 2029.9799 | 46.1 | 0    | 30    | 0.28    | 1    | U      | R.FHDFLGDSWGILFSHPR.D                             |
| <input checked="" type="checkbox"/> <a href="#">40</a> | 2142.1814 | 2141.1741 | 2141.0753 | 46.2 | 0    | 71    | 2.2e-05 | 1    | U      | -.PGLLLGDEAPNFEANTTIGR.I                          |
| <input checked="" type="checkbox"/> <a href="#">42</a> | 2154.2661 | 2153.2588 | 2153.1732 | 39.7 | 0    | 55    | 0.00047 | 1    | U      | R.VVDSLQLTGTKPVATPVDWK.K                          |

# Protein View

Match to: PRDX6\_MOUSE score: 306

Peroxiredoxin-6 (EC 1.11.1.15) (Antioxidant protein 2) (1-Cys peroxiredoxin) (1-Cys PRX) (Acidic calcium-independent)  
Found in search of ppw\_D6\_129990871703.txt

Nominal mass (M<sub>r</sub>): 24724; Calculated pI value: 5.72

NCBI BLAST search of [PRDX6\\_MOUSE](#) against nr  
Unformatted [sequence string](#) for pasting into other applications

Taxonomy: [Mus musculus](#)

Variable modifications: Carbamidomethyl (C), Deamidated (NQ), Oxidation (M)  
Cleavage by Trypsin: cuts C-term side of KR unless next residue is P  
Sequence Coverage: 69%

Matched peptides shown in **Bold Red**

1 **PGGLLLGDEA PNFEANTTIG RIRFHDFLGD SWGILFSHPR DFTPVCTTEL**  
51 **GRAAKLAPEF AKRNVKLIAL SIDSVEDHLA WSKDINAYNG ETPTEKLPFP**  
101 **IIDDKGRDLA ILLGMLDPVE KDDNNMPVTA RVVVFIFGPK KLKLSILYPA**  
151 **TTGRNFDEIL RVVDSLQLTG TKPVATPVDW KKGESVMVVP TLSEEEAKQC**  
201 **FPGKGVFTKEL PSGKKYLRYT PQP**

Show predicted peptides also

Sort Peptides By  Residue Number  Increasing Mass  Decreasing Mass

| Start - End | Observed  | Mr(expt)  | Mr(calc)  | ppm | Miss | Sequence                                                                |
|-------------|-----------|-----------|-----------|-----|------|-------------------------------------------------------------------------|
| 1 - 21      | 2142.1814 | 2141.1741 | 2141.0753 | 46  | 0    | - . PGGLLLGDEAPNFEANTTIGR.I ( <a href="#">Ions score 71</a> )           |
| 24 - 40     | 2031.0808 | 2030.0735 | 2029.9799 | 46  | 0    | R. FHDFLGDSWGILFSHPR.D ( <a href="#">Ions score 30</a> )                |
| 41 - 52     | 1395.7209 | 1394.7136 | 1394.6500 | 46  | 0    | R. DFTPVCTTELGR.A Carbamidomethyl (C) ( <a href="#">Ions score 71</a> ) |
| 67 - 83     | 1897.0906 | 1896.0833 | 1895.9993 | 44  | 0    | K. LIALSIDSVEDHLAWK.D ( <a href="#">Ions score 72</a> )                 |
| 84 - 96     | 1451.7247 | 1450.7174 | 1450.6576 | 41  | 0    | K. DINAYNGETPTEK.L ( <a href="#">Ions score 45</a> )                    |
| 97 - 105    | 1057.6310 | 1056.6237 | 1056.5855 | 36  | 0    | K. LPFPIIDDK.G ( <a href="#">Ions score 59</a> )                        |
| 97 - 107    | 1270.7704 | 1269.7631 | 1269.7081 | 43  | 1    | K. LPFPIIDDKGR.D ( <a href="#">Ions score 42</a> )                      |
| 132 - 140   | 1021.6072 | 1020.5999 | 1020.5644 | 35  | 0    | R. VVFIFGPK.K ( <a href="#">Ions score 43</a> )                         |
| 132 - 141   | 1149.7048 | 1148.6975 | 1148.6594 | 33  | 1    | R. VVFIFGPKK.L ( <a href="#">Ions score 35</a> )                        |
| 144 - 154   | 1191.7252 | 1190.7179 | 1190.6659 | 44  | 0    | K. LSILYPATTGR.N ( <a href="#">Ions score 36</a> )                      |
| 155 - 161   | 906.5024  | 905.4952  | 905.4607  | 38  | 0    | R. NFDEILR.V ( <a href="#">Ions score 40</a> )                          |
| 162 - 181   | 2154.2661 | 2153.2588 | 2153.1732 | 40  | 0    | R. VVDSLQLTGTPVATPVDWK.K ( <a href="#">Ions score 55</a> )              |
| 182 - 198   | 1833.0288 | 1832.0215 | 1831.9237 | 53  | 1    | K. KGESVMVVP TLSEEEAK.Q ( <a href="#">Ions score 24</a> )               |

Sample M21

4700 Reflector Spec #1 MC=>NR(2.00)[BP = 1149.6, 49685]

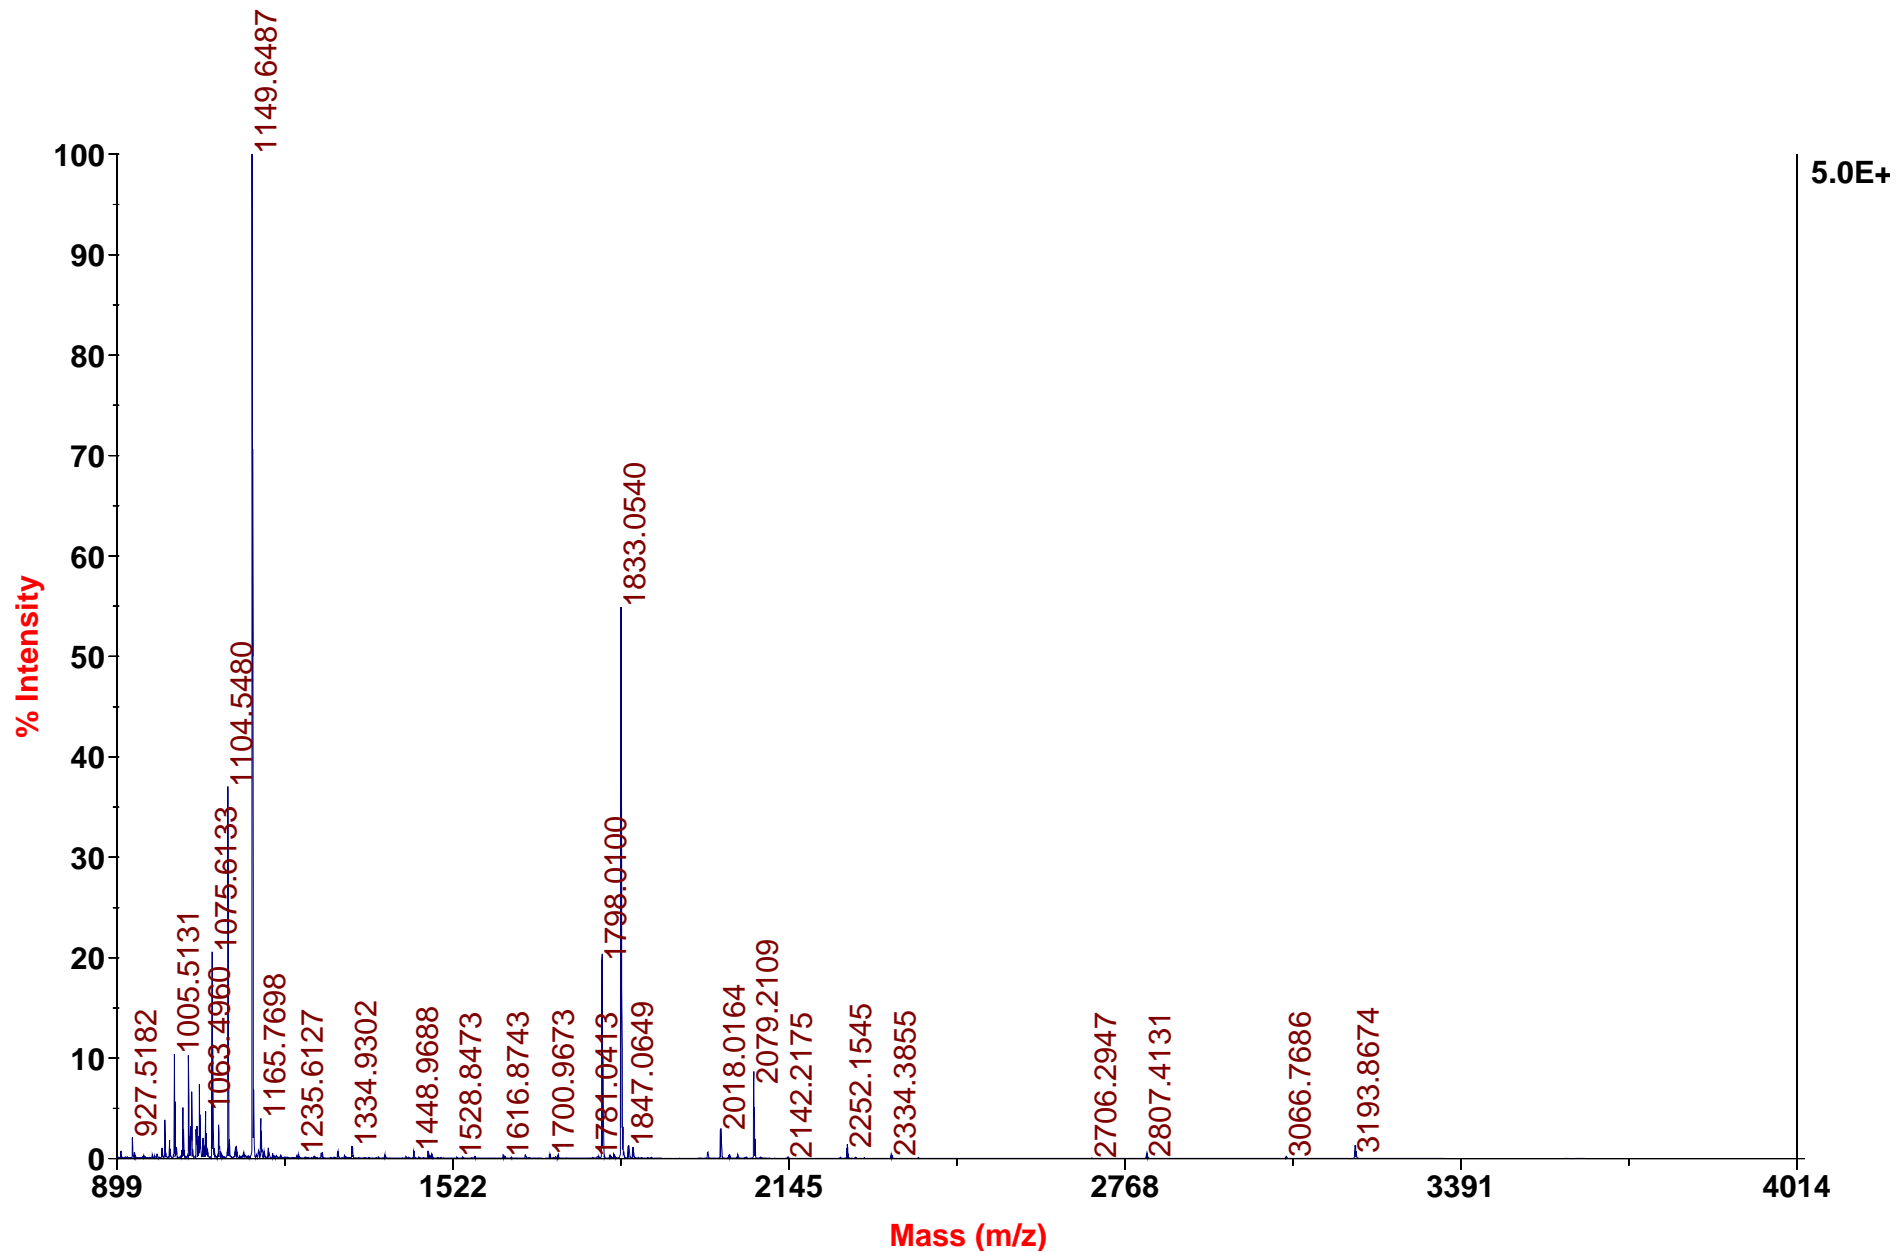

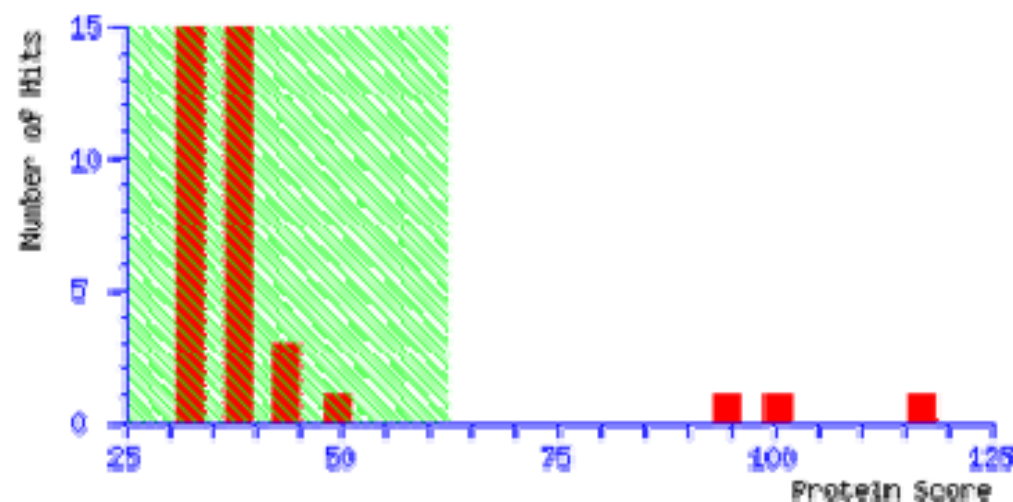

## Concise Protein Summary Report

Format As

Concise Protein Summary

[Help](#)

Significance threshold  $p <$

Max. number of hits

- [JN0679](#)    **Mass:** 23000    **Score:** 117    **Expect:** 1.8e-07    **Matches:** 18  
 heat shock protein 25 - mouse

[S02143](#)    **Mass:** 22868    **Score:** 106    **Expect:** 2.3e-06    **Matches:** 17  
 stress protein, 25K - mouse

[CAB37341](#)    **Mass:** 22838    **Score:** 94    **Expect:** 3.6e-05    **Matches:** 16  
 MURSPH NID: - Mus sp.

[A53423](#)    **Mass:** 22887    **Score:** 93    **Expect:** 4.6e-05    **Matches:** 15  
 HSP27-related protein (form a) - mouse

## Protein View

Match to: **JN0679** Score: 117 Expect: 1.8e-07

**heat shock protein 25 - mouse**

Found in search of pmf\_E6\_129990866104.txt

Nominal mass ( $M_r$ ): 23000; Calculated pI value: 6.12

NCBI BLAST search of [JN0679](#) against nr

Unformatted [sequence string](#) for pasting into other applications

Taxonomy: [Mus musculus](#)

Links to retrieve other entries containing this sequence from NCBI Entrez:

(no taxonomy information for this entry)  
(no taxonomy information for this entry)

Variable modifications: Carbamidomethyl (C), Deamidated (NQ), Oxidation (M)

Cleavage by Trypsin: cuts C-term side of KR unless next residue is P

Number of mass values searched: 110

Number of mass values matched: 18

Sequence Coverage: 71%

Matched peptides shown in **Bold Red**

1 MTER**RVPFSL** **LRSPSWEPFR** **DWYPAHSRLF** **DQAFGVPR**LP DEWSQWFSAA  
51 GWPGYVRPLP AATAEGPAAV TLAAPAFSRA LNR**QLSSGV**S **EIR**QTADRWR  
101 **VSLDVNHFAP** **EELTVKTKEG** **VVEITGKHEE** **RQDEHGYISR** CFTR**KYTLPP**  
151 **GVDPTLVSS** **LSPEGLTVE** **APLPKAVTQS** **AEITIPVTFE** **ARAQIGGPEA**  
201 **GKSEQSGAK**

Show predicted peptides also

Sort Peptides By

Residue Number  Increasing Mass  Decreasing Mass

| Start | End | Observed  | Mr(expt)  | Mr(calc)  | ppm | Miss | Sequence               |
|-------|-----|-----------|-----------|-----------|-----|------|------------------------|
| 5     | 12  | 987.6417  | 986.6344  | 986.6025  | 32  | 1    | R. RVPFSLLR. S         |
| 6     | 20  | 1818.0321 | 1817.0248 | 1816.9624 | 34  | 1    | R. VPFSLLRSPSWEPFR. D  |
| 13    | 20  | 1005.5128 | 1004.5055 | 1004.4716 | 34  | 0    | R. SPSWEPFR. D         |
| 13    | 28  | 2018.0139 | 2017.0066 | 2016.9231 | 41  | 1    | R. SPSWEPFRDWYPAHSR. L |
| 21    | 28  | 1031.5046 | 1030.4973 | 1030.4621 | 34  | 0    | R. DWYPAHSR. L         |
| 29    | 38  | 1149.6465 | 1148.6392 | 1148.5979 | 36  | 0    | R. LFDQAFGVPR. L       |
| 84    | 93  | 1075.6113 | 1074.6040 | 1074.5669 | 35  | 0    | R. QLSSGVSEIR. Q       |
| 101   | 116 | 1798.0094 | 1797.0021 | 1796.9309 | 40  | 0    | R. VSLDVNHFAPEELTVK. T |
| 117   | 127 | 1160.6812 | 1159.6739 | 1159.6449 | 25  | 1    | K. TKEGVVEITGK. H      |
| 119   | 127 | 931.5301  | 930.5228  | 930.5022  | 22  | 0    | K. EGVVEITGK. H        |

# M21

4700 MS/MS Precursor 1149.65 Spec #1 MC[BP = 774.4, 6510]

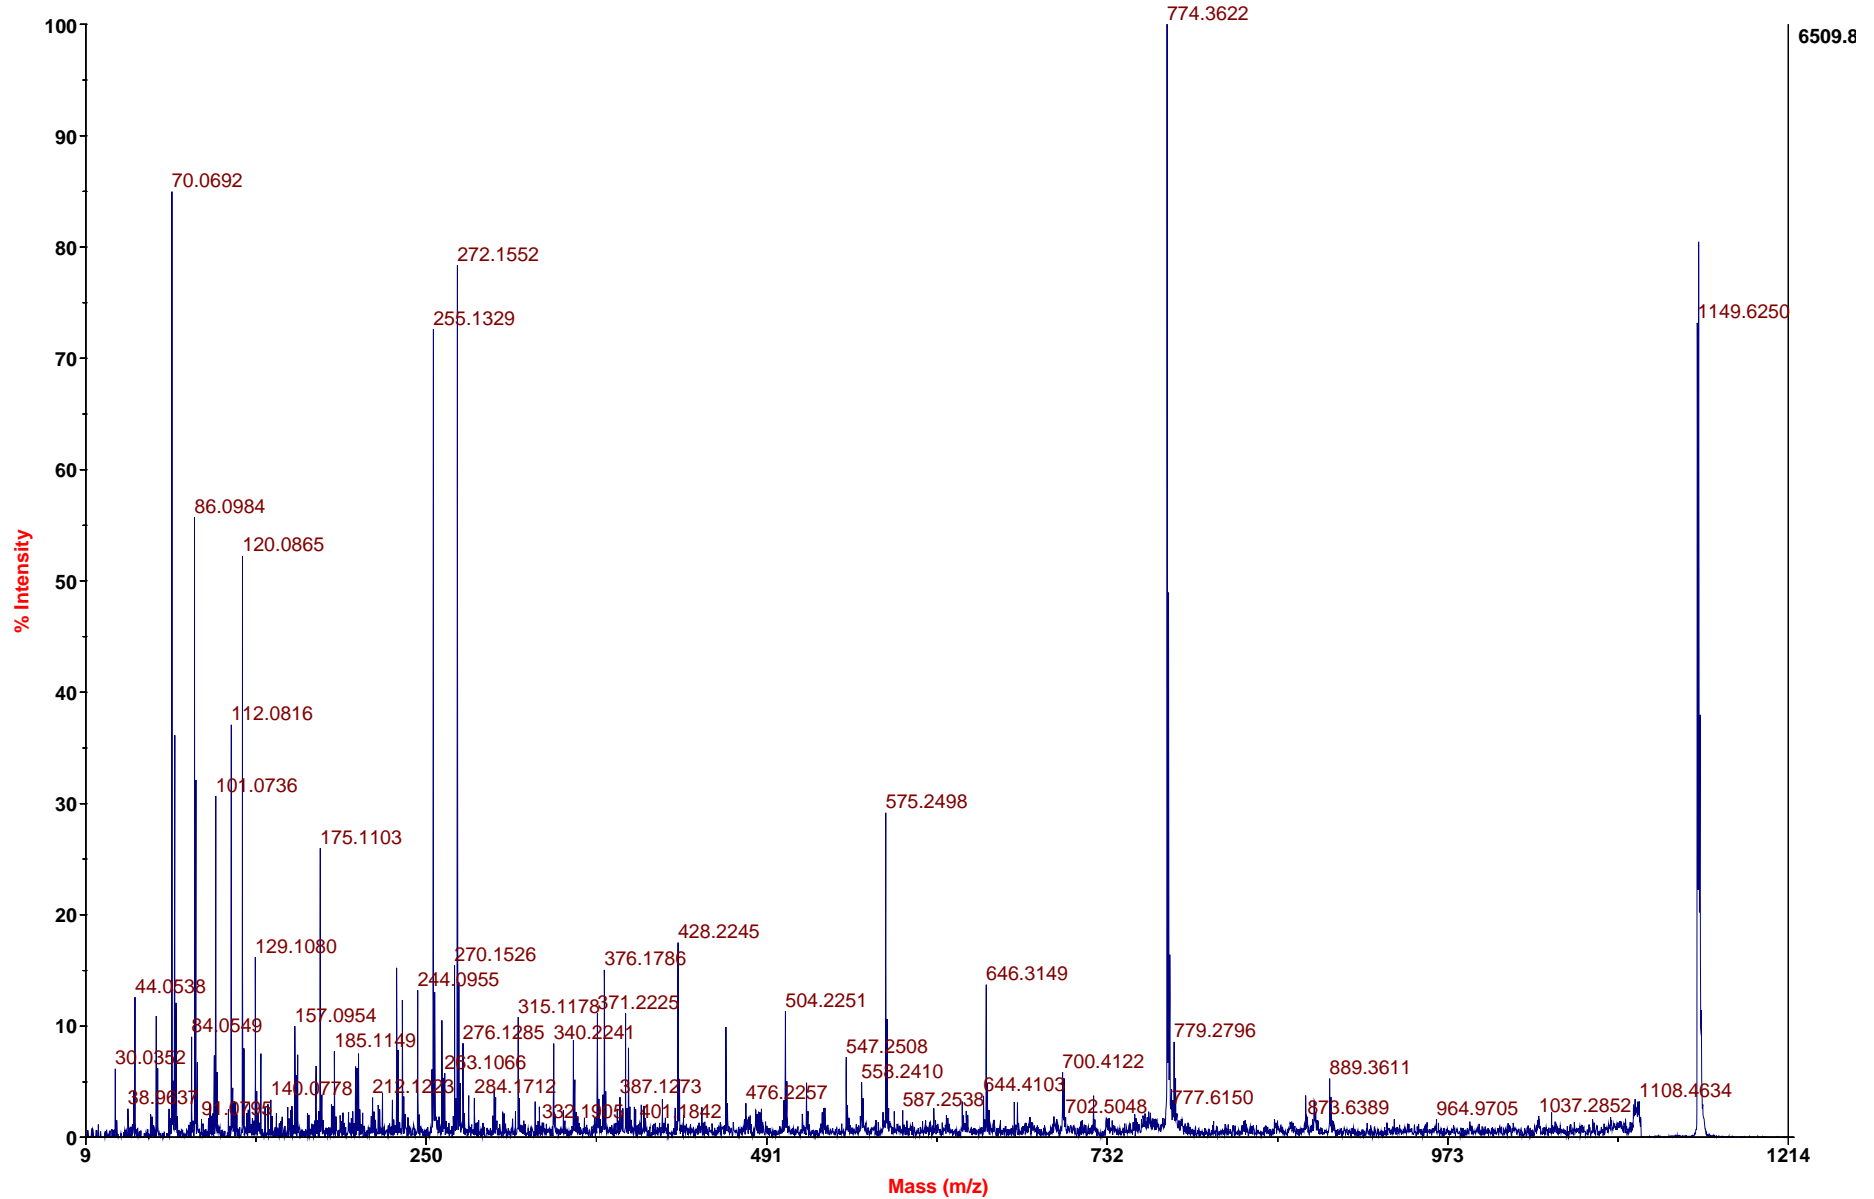

# M21

4700 MS/MS Precursor 1051.74 Spec #1 MC[BP = 102.1, 2464]

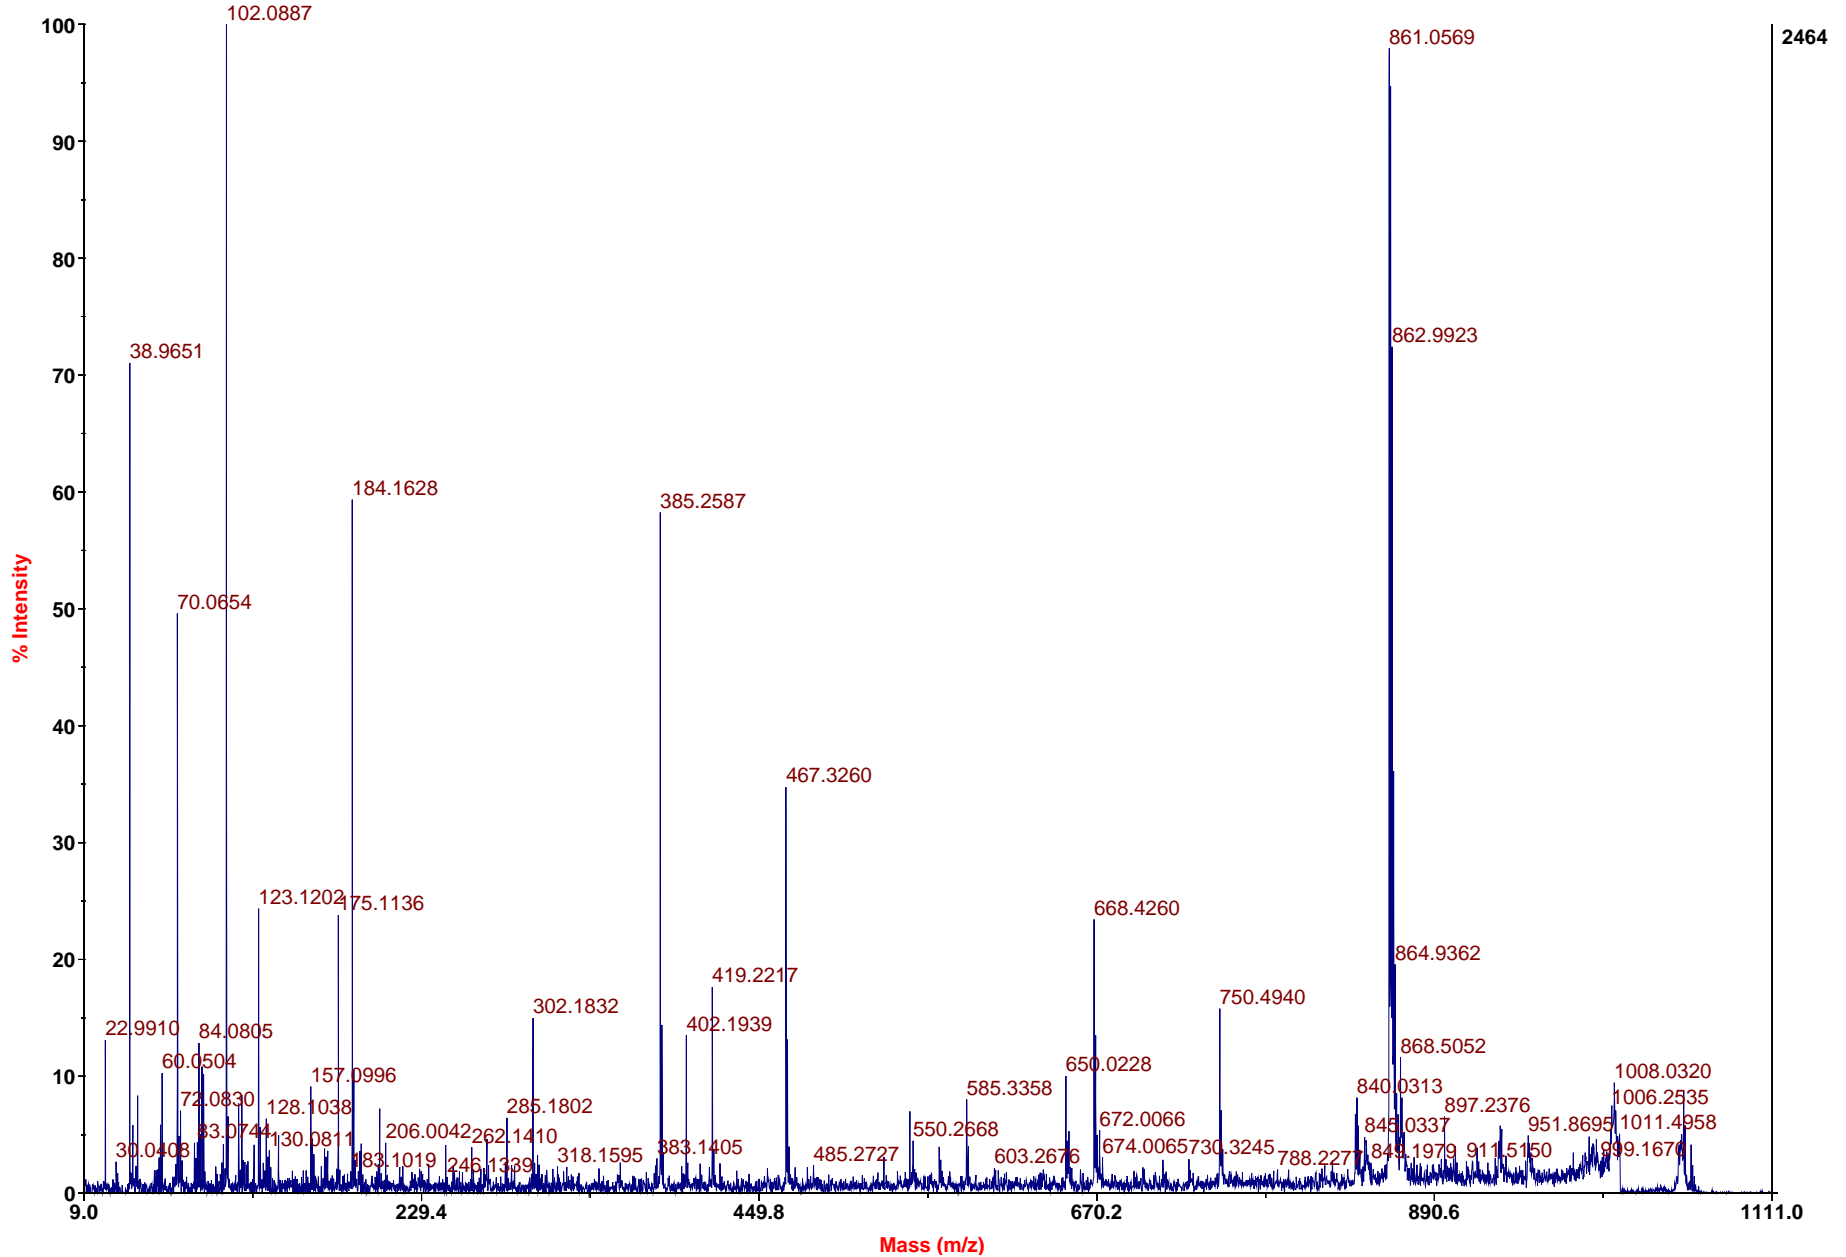



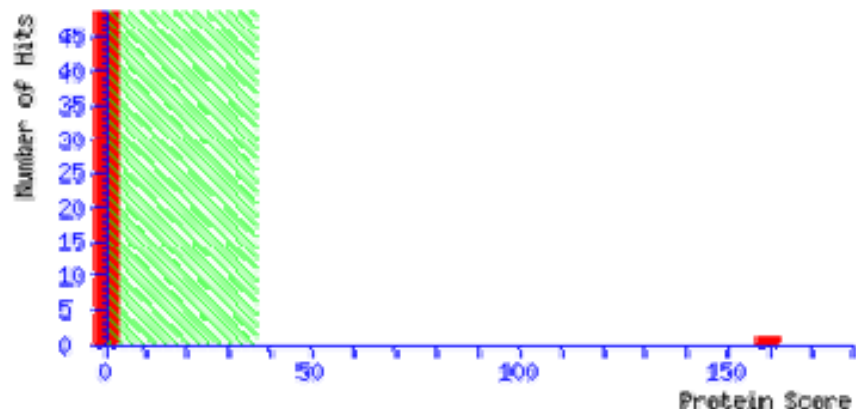

## Peptide Summary Report

Format As

Peptide Summary

[Help](#)

Significance threshold  $p <$

Max. number of hits

Standard scoring  MudPIT scoring

Ions score or expect cut-off

Show sub-sets

Show pop-ups  Suppress pop-ups

Sort unassigned

Require bold red

Select All

Select None

Search Selected

Error tolerant

1. [JN0679](#) Mass: 23000 Score: 160 Matches: 9 (5) Sequences: 9 (5) emPAI: 2.46

heat shock protein 25 - mouse

Check to include this hit in error tolerant search

| Query                                                  | Observed  | Mr(expt)  | Mr(calc)  | ppm  | Miss | Score | Expect  | Rank | Unique | Peptide              |
|--------------------------------------------------------|-----------|-----------|-----------|------|------|-------|---------|------|--------|----------------------|
| <input checked="" type="checkbox"/> <a href="#">1</a>  | 927.5178  | 926.5105  | 926.4821  | 30.7 | 0    | 36    | 0.051   | 1    | U      | R.AQIGGPEAGK.S       |
| <input checked="" type="checkbox"/> <a href="#">2</a>  | 987.6417  | 986.6344  | 986.6025  | 32.4 | 1    | 18    | 2.1     | 1    | U      | R.RVPFSLLR.S         |
| <input checked="" type="checkbox"/> <a href="#">6</a>  | 1031.5046 | 1030.4973 | 1030.4621 | 34.2 | 0    | 22    | 2.3     | 1    | U      | R.DWYPAHSR.L         |
| <input checked="" type="checkbox"/> <a href="#">9</a>  | 1075.6113 | 1074.6040 | 1074.5669 | 34.5 | 0    | 46    | 0.0067  | 1    | U      | R.QLSSGVSEIR.Q       |
| <input checked="" type="checkbox"/> <a href="#">12</a> | 1149.6465 | 1148.6392 | 1148.5979 | 36.0 | 0    | 62    | 0.00016 | 1    | U      | R.LFDQAFGVPR.L       |
| <input checked="" type="checkbox"/> <a href="#">14</a> | 1798.0094 | 1797.0021 | 1796.9309 | 39.7 | 0    | 68    | 3.6e-05 | 1    | U      | R.VSLDVNHFAPEELTVK.T |

## Protein View

Match to: **JN0679** Score: 160  
**heat shock protein 25 - mouse**  
Found in search of ppw\_E6\_129990871804.txt

Nominal mass ( $M_r$ ): 23000; Calculated pI value: 6.12  
NCBI BLAST search of [JN0679](#) against nr  
Unformatted [sequence string](#) for pasting into other applications

Taxonomy: [Mus musculus](#)

Links to retrieve other entries containing this sequence from NCBI Entrez:

(no taxonomy information for this entry)  
(no taxonomy information for this entry)

Variable modifications: Carbamidomethyl (C), Deamidated (NQ), Oxidation (M)  
Cleavage by Trypsin: cuts C-term side of KR unless next residue is P  
Sequence Coverage: 56%

Matched peptides shown in **Bold Red**

1 MTER**RVPFSL** **LRSPSWEPFR** **DWYPAHSRLF** **DQAFGVPR**LP DEWSQWFSAA  
51 GWPGYVRPLP AATAEGPAAV TLAAPAFSRA LNR**QLSSGV**S **EIR**QTADRWR  
101 **VSLDVNHFA**P **EELTVK**TKEG VVEITGKHEE RQDEHGYISR CFTR**KYTLPP**  
151 **GVDPTLVSS** **LSPEGLTVE** **APLPKAVTQS** **AEITIPVTFE** **ARAQIGGPEA**  
201 **GK**SEQSGAK

Show predicted peptides also

Sort Peptides By

Residue Number  Increasing Mass  Decreasing Mass

| Start - End | Observed  | Mr (expt) | Mr (calc) | ppm | Miss | Sequence                                                                     |
|-------------|-----------|-----------|-----------|-----|------|------------------------------------------------------------------------------|
| 5 - 12      | 987.6417  | 986.6344  | 986.6025  | 32  | 1    | <b>R.RVPFSL</b> LR.S ( <a href="#">Ions score 18</a> )                       |
| 13 - 28     | 2018.0139 | 2017.0066 | 2016.9231 | 41  | 1    | <b>R.SPSWEPFR</b> DWYPAHSR.L ( <a href="#">Ions score 14</a> )               |
| 21 - 28     | 1031.5046 | 1030.4973 | 1030.4621 | 34  | 0    | <b>R.DWYPAHSR</b> .L ( <a href="#">Ions score 22</a> )                       |
| 29 - 38     | 1149.6465 | 1148.6392 | 1148.5979 | 36  | 0    | <b>R.LFDQAFGVPR</b> .L ( <a href="#">Ions score 62</a> )                     |
| 84 - 93     | 1075.6113 | 1074.6040 | 1074.5669 | 35  | 0    | <b>R.QLSSGVSEIR</b> .Q ( <a href="#">Ions score 46</a> )                     |
| 101 - 116   | 1798.0094 | 1797.0021 | 1796.9309 | 40  | 0    | <b>R.VSLDVNHFAPEELTVK</b> .T ( <a href="#">Ions score 68</a> )               |
| 145 - 175   | 3193.8574 | 3192.8501 | 3192.7170 | 42  | 1    | <b>R.KYTLPPGVDPTLVSSSL</b> SPEGLTVEAPLPK.A ( <a href="#">Ions score 69</a> ) |
| 176 - 192   | 1833.0530 | 1832.0457 | 1831.9680 | 42  | 0    | <b>K.AVTQSAEITIPVTFEAR</b> .A ( <a href="#">Ions score 69</a> )              |
| 193 - 202   | 927.5178  | 926.5105  | 926.4821  | 31  | 0    | <b>R.AQIGGPEAGK</b> .S ( <a href="#">Ions score 36</a> )                     |

Sample M22

4700 Reflector Spec #1 MC=>NR(2.00)[BP = 966.5, 20298]

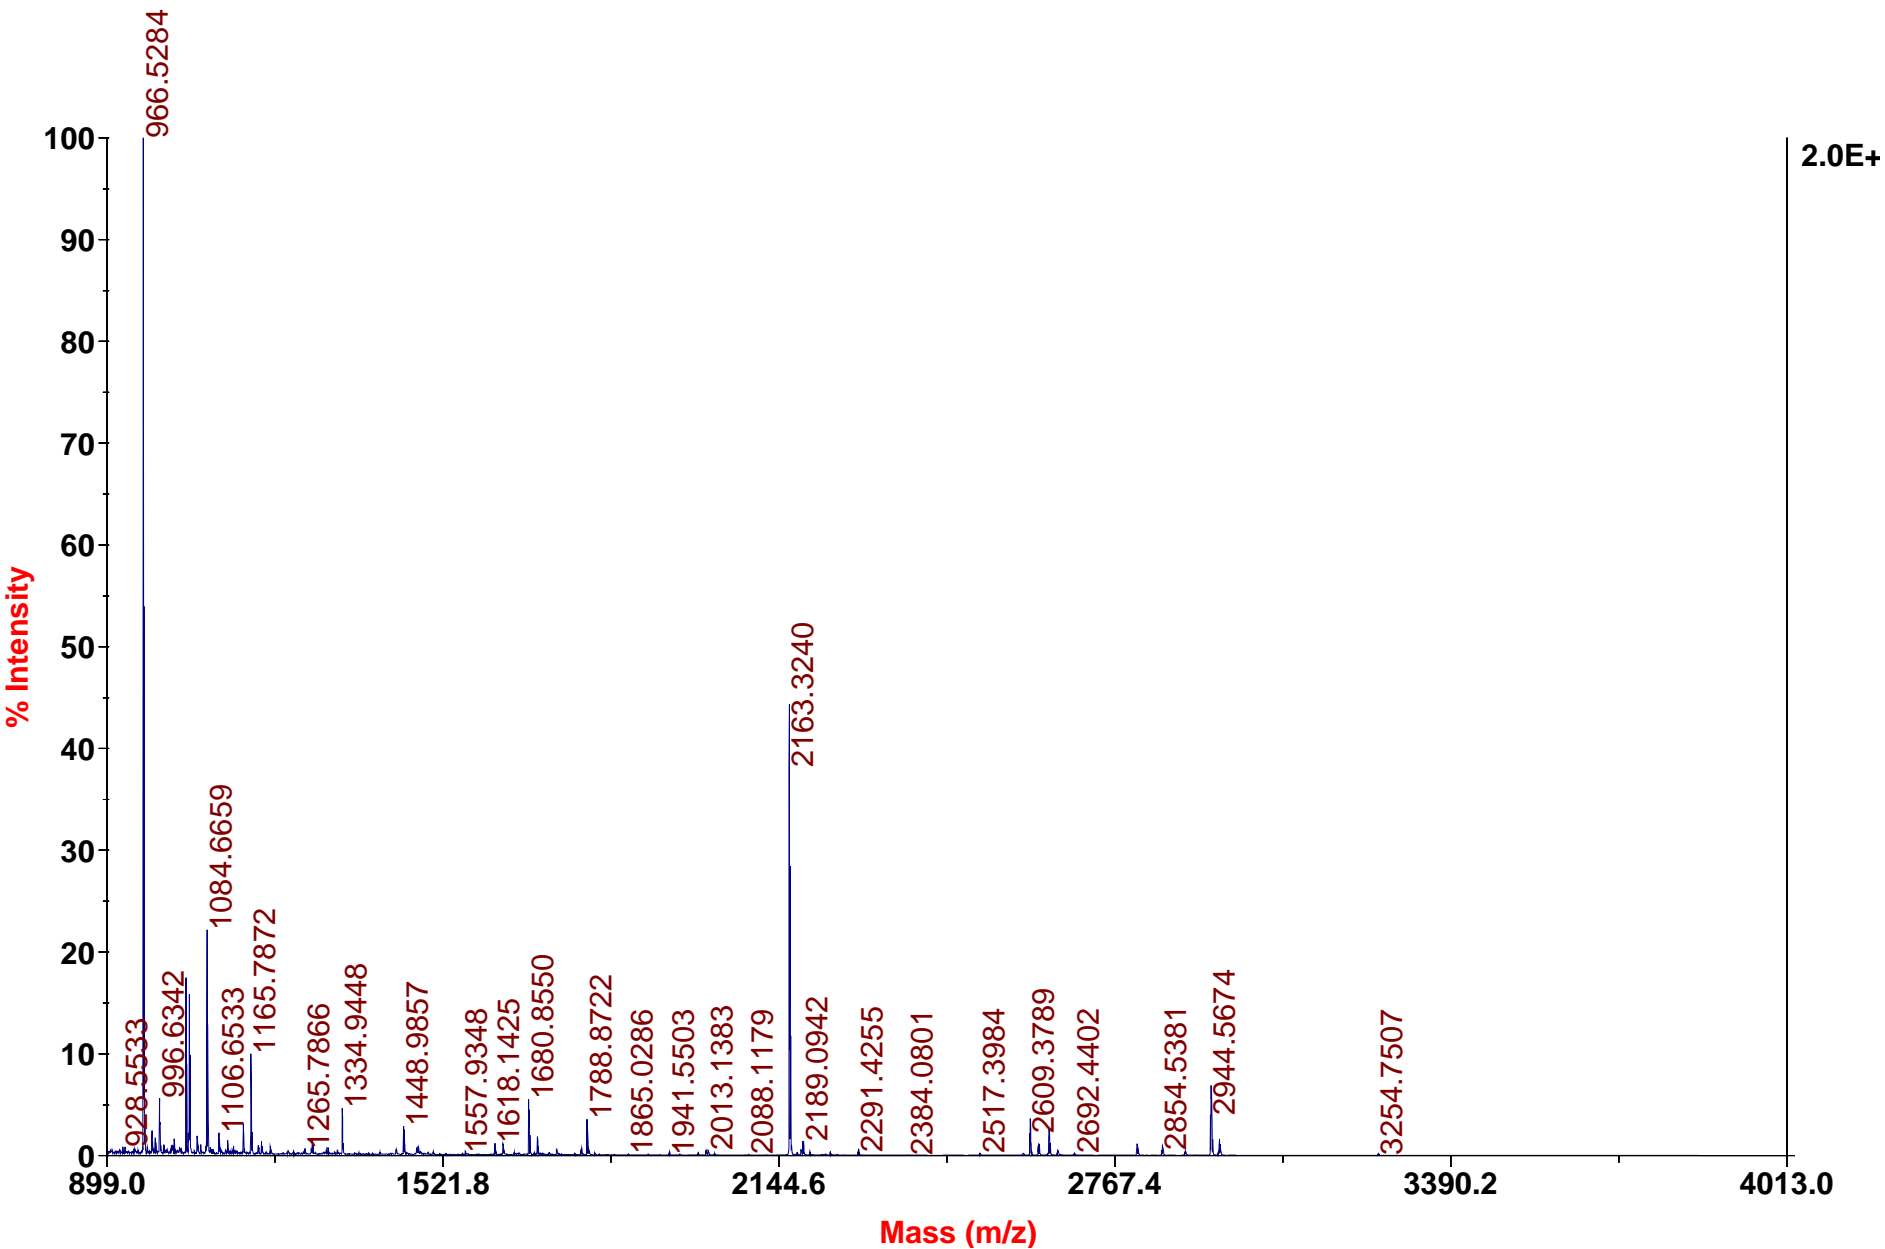

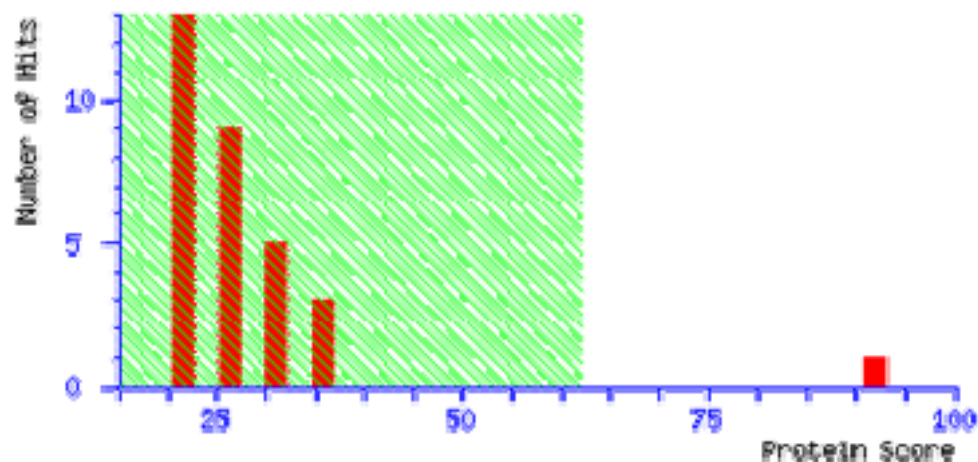

## Concise Protein Summary Report

Format As

Concise Protein Summary

[Help](#)

Significance threshold  $p <$

Max. number of hits

- [GDIS MOUSE](#)    **Mass:** 22705    **Score:** 92    **Expect:** 6.1e-05    **Matches:** 17  
 Rho GDP-dissociation inhibitor 2 (Rho GDI 2) (Rho-GDI beta) (D4).- Mus musculus (Mouse  
[I49687](#)    **Mass:** 22836    **Score:** 92    **Expect:** 6.2e-05    **Matches:** 17  
 GDP-dissociation inhibitor - mouse

## Protein View

Match to: **GDIS\_MOUSE** score: 92 Expect: 6.1e-05

**Rho GDP-dissociation inhibitor 2 (Rho GDI 2) (Rho-GDI beta) (D4) - Mus musculus (Mouse)**.

Found in search of pmf\_F6\_129990866105.txt

Nominal mass ( $M_r$ ): 22705; Calculated pI value: 4.97

NCBI BLAST search of [GDIS\\_MOUSE](#) against nr

Unformatted [sequence string](#) for pasting into other applications

Taxonomy: [Mus musculus](#)

Variable modifications: Carbamidomethyl (C), Deamidated (NQ), Oxidation (M)

Cleavage by Trypsin: cuts C-term side of KR unless next residue is P

Number of mass values searched: 97

Number of mass values matched: 17

Sequence Coverage: 81%

Matched peptides shown in **Bold Red**

```
1  TEKDAQPQLE EADDDLDSKL NYKPPPQKSL KELQEMDKDD ESLTKYKCTL
51 LGDVPVADP TVPNVTVTRL SLVCD SAPGP ITMDLTGDLE ALKKDTFVLK
101 EGIEYRVKIN FKVNKDIVSG LKYVQHTYRT GMRVDKATFM VGSYGPRPEE
151 YEFLTPVEEA PKGMLARGTY HNKSFFTDDD KQDHLTWEWN LAIKKDWTE
```

Show predicted peptides also

Sort Peptides By

Residue Number  Increasing Mass  Decreasing Mass

| Start - End | Observed  | Mr(expt)  | Mr(calc)  | ppm | Miss | Sequence                                 |
|-------------|-----------|-----------|-----------|-----|------|------------------------------------------|
| 4 - 19      | 1788.8712 | 1787.8639 | 1787.7697 | 53  | 0    | <b>K.DAQPQLEEADDDLDSK.L</b>              |
| 4 - 28      | 2854.5359 | 2853.5286 | 2853.3668 | 57  | 1    | <b>K.DAQPQLEEADDDLDSKLNKPPPQK.S</b>      |
| 20 - 28     | 1084.6661 | 1083.6588 | 1083.6077 | 47  | 0    | <b>K.LNKPPPQK.S</b>                      |
| 32 - 45     | 1680.8522 | 1679.8449 | 1679.7560 | 53  | 1    | <b>K.ELQEMDKDDESLTK.Y</b>                |
| 32 - 45     | 1696.8540 | 1695.8467 | 1695.7509 | 57  | 1    | <b>K.ELQEMDKDDESLTK.Y</b> Oxidation (M)  |
| 48 - 69     | 2291.4194 | 2290.4121 | 2290.2897 | 53  | 1    | <b>K.KTL LGDVPVADPTVPNVTVTR.L</b>        |
| 49 - 69     | 2163.3232 | 2162.3159 | 2162.1947 | 56  | 0    | <b>K.TLLGDVPVADPTVPNVTVTR.L</b>          |
| 70 - 93     | 2516.4006 | 2515.3933 | 2515.2550 | 55  | 0    | <b>R.LSLVCD SAPGPITMDLTGDLEALK.K</b> Car |
| 70 - 94     | 2644.5061 | 2643.4988 | 2643.3499 | 56  | 1    | <b>R.LSLVCD SAPGPITMDLTGDLEALKK.D</b> Ca |
| 70 - 94     | 2660.5107 | 2659.5034 | 2659.3448 | 60  | 1    | <b>R.LSLVCD SAPGPITMDLTGDLEALKK.D</b> Ca |
| 95 - 106    | 1469.8688 | 1468.8615 | 1468.7562 | 72  | 1    | <b>K.DTFVLKEGIEYR.V</b>                  |
| 113 - 122   | 1072.6866 | 1071.6793 | 1071.6288 | 47  | 1    | <b>K.VNKDIVSGLK.Y</b>                    |
| 123 - 129   | 966.5283  | 965.5210  | 965.4719  | 51  | 0    | <b>K.YVQHTYR.T</b>                       |
| 137 - 162   | 2944.5640 | 2943.5567 | 2943.4000 | 53  | 0    | <b>K.ATFMVGSYGPRPEEYEFLTPVEEAPK.G</b>    |
| 137 - 162   | 2960.5784 | 2959.5711 | 2959.3950 | 60  | 0    | <b>K.ATFMVGSYGPRPEEYEFLTPVEEAPK.G</b> O  |
| 174 - 194   | 2609.3772 | 2608.3699 | 2608.2234 | 56  | 1    | <b>K.SFFTDDDKQDHLTWEWNLAIK.K</b>         |
| 182 - 194   | 1653.9197 | 1652.9124 | 1652.8311 | 49  | 0    | <b>K.QDHLTWEWNLAIK.K</b>                 |

# M22

4700 MS/MS Precursor 1084.67 Spec #1 MC[BP = 566.3, 1640]

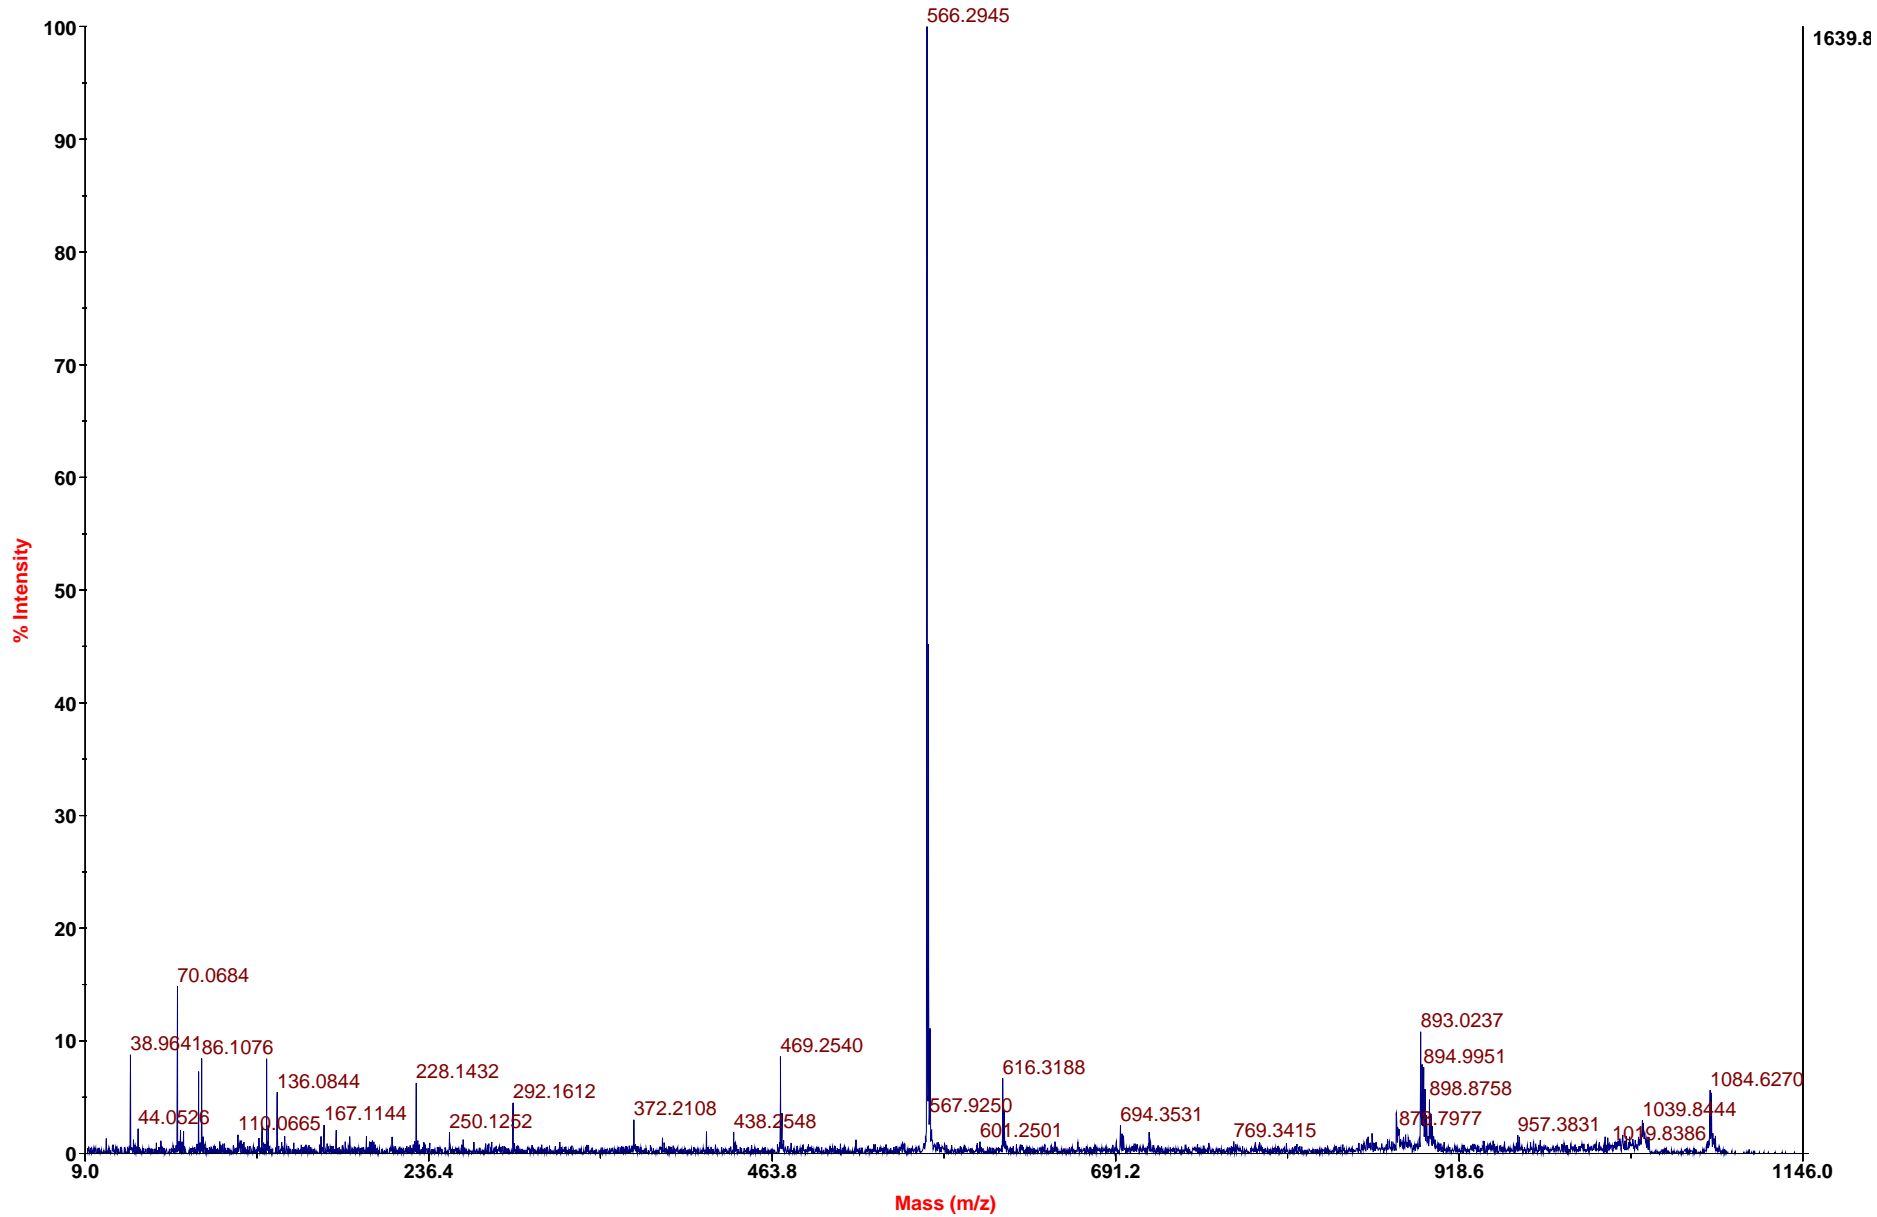

# M22

4700 MS/MS Precursor 1045.62 Spec #1 MC[BP = 860.9, 1326]

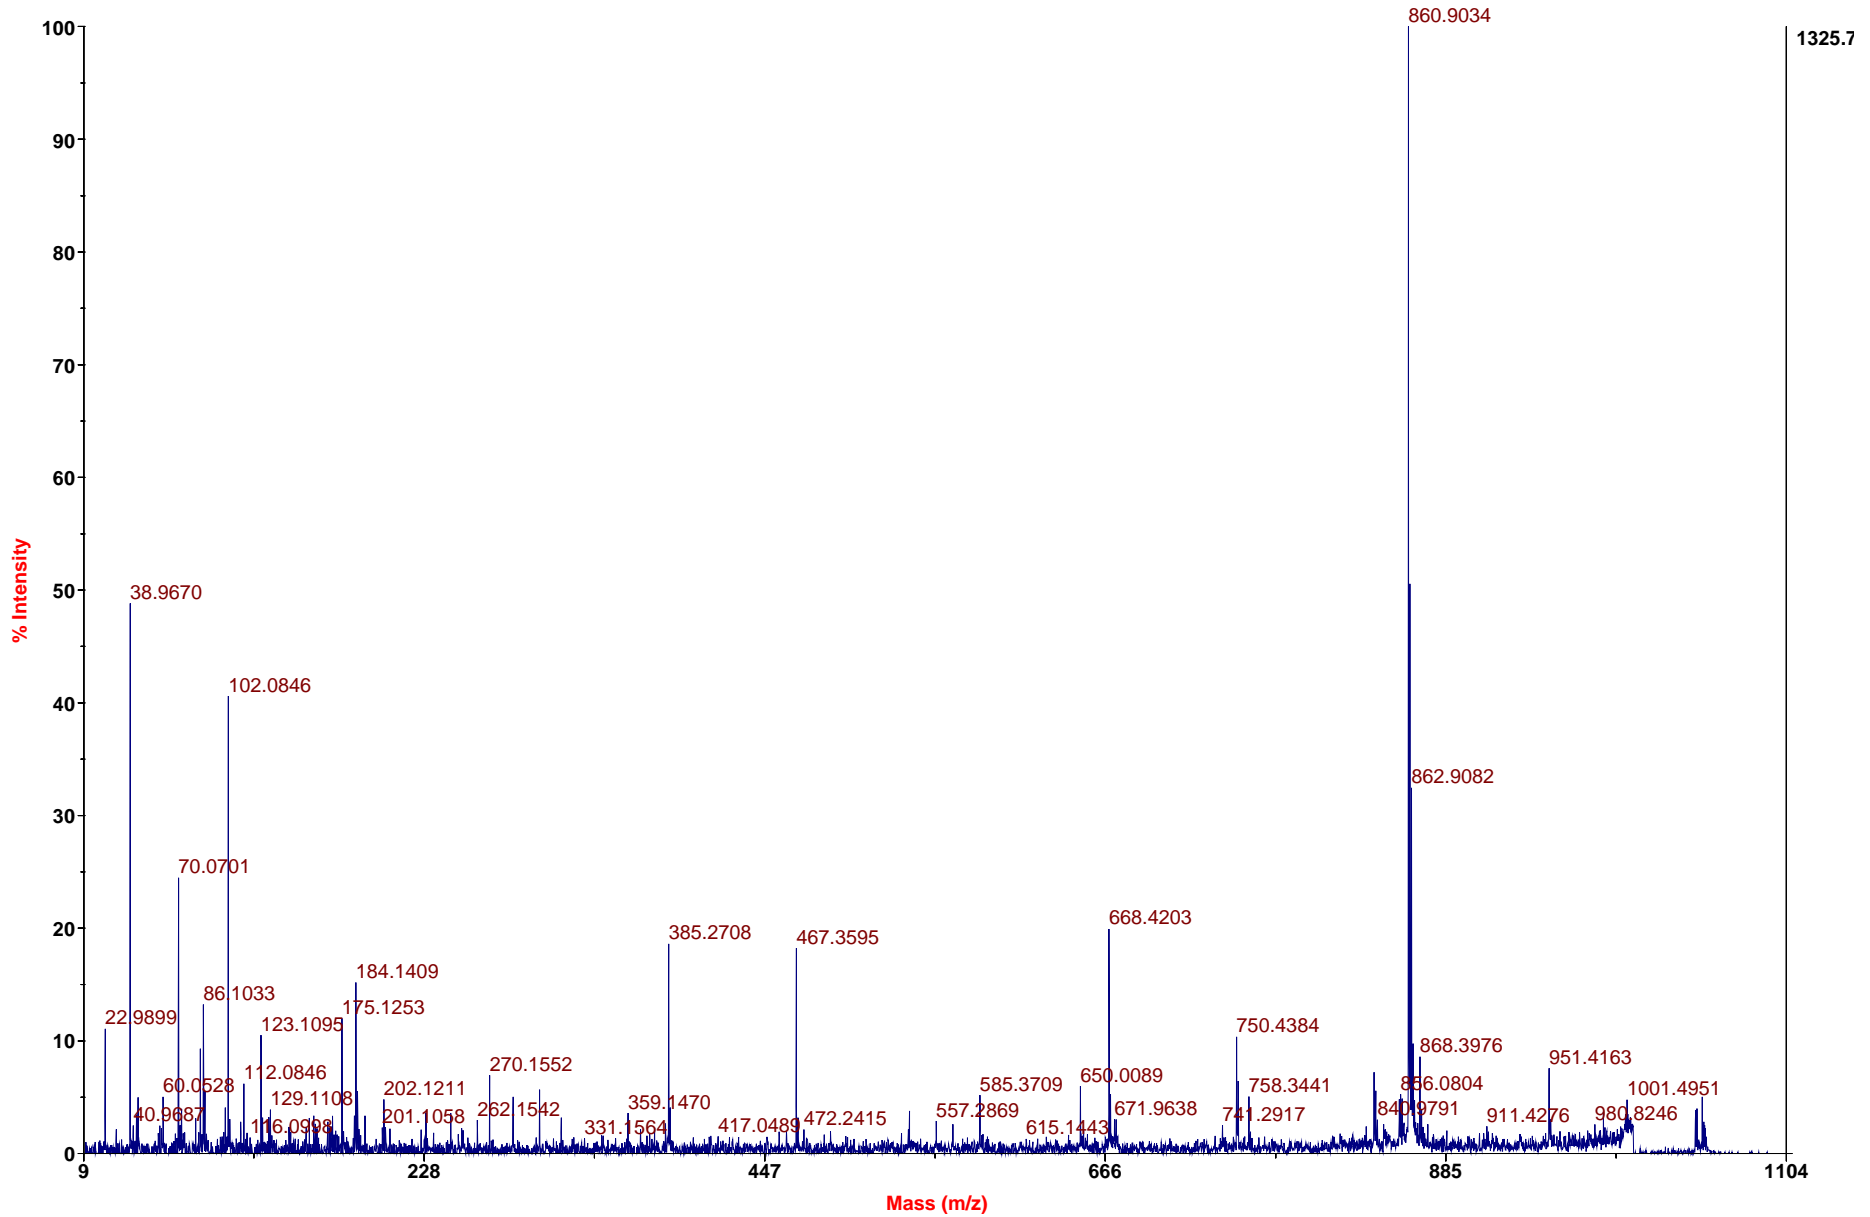



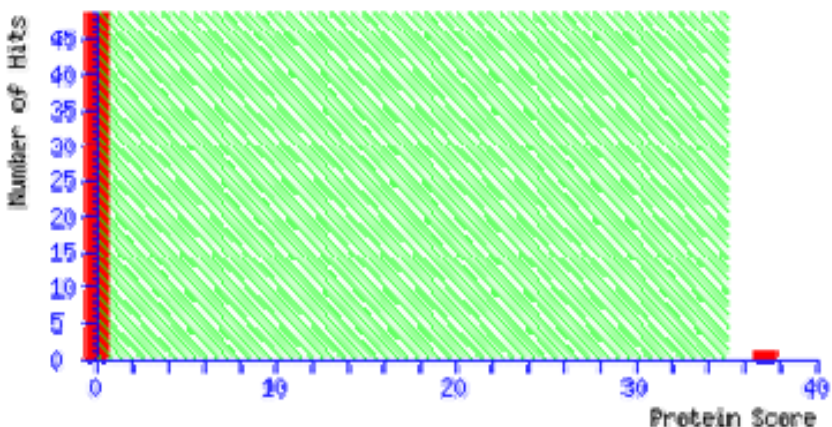

## Peptide Summary Report

Format As Peptide Summary

[Help](#)

Significance threshold  $p <$

Max. number of hits

Standard scoring  MudPIT scoring  Ions score or expect cut-off

Show sub-sets

Show pop-ups  Suppress pop-ups  Sort unassigned

Require bold red

Select All

Select None

Search Selected

Error tolerant

1. [GDIS\\_MOUSE](#) Mass: 22705 Score: 37 Matches: 5(0) Sequences: 5(0) emPAI: 0.65  
 Rho GDP-dissociation inhibitor 2 (Rho GDI 2) (Rho-GDI beta) (D4).- Mus musculus (Mouse).

Check to include this hit in error tolerant search

| Query                                                  | Observed  | Mr(expt)  | Mr(calc)  | ppm  | Miss | Score | Expect | Rank | Unique | Peptide                     |
|--------------------------------------------------------|-----------|-----------|-----------|------|------|-------|--------|------|--------|-----------------------------|
| <input checked="" type="checkbox"/> <a href="#">1</a>  | 966.5283  | 965.5210  | 965.4719  | 50.8 | 0    | 31    | 0.18   | 1    | U      | K. YVQHTYR. T               |
| <a href="#">6</a>                                      | 1084.6661 | 1083.6588 | 1083.6077 | 47.2 | 0    | 7     | 30     | 5    | U      | K. LNYKPPPQK. S             |
| <input checked="" type="checkbox"/> <a href="#">14</a> | 1788.8712 | 1787.8639 | 1787.7697 | 52.7 | 0    | 16    | 9.1    | 1    | U      | K. DAQPQLEEADDDLDISK. L     |
| <input checked="" type="checkbox"/> <a href="#">33</a> | 2163.3232 | 2162.3159 | 2162.1947 | 56.0 | 0    | 30    | 0.077  | 1    | U      | K. TLLGDVPVWADPTVPNVTVTR. L |
| <input checked="" type="checkbox"/> <a href="#">55</a> | 2644.5061 | 2643.4988 | 2643.3499 | 56.3 | 1    | 9     | 24     | 1    | U      | R. LSLVCDSPRCRITMDLTGDLK. L |



## Protein View

Match to: [GDIS\\_MOUSE](#) Score: 37

Rho GDP-dissociation inhibitor 2 (Rho GDI 2) (Rho-GDI beta) (D4). - Mus musculus (Mouse).

Found in search of ppw\_F6\_129990872005.txt

Nominal mass ( $M_r$ ): 22705; Calculated pI value: 4.97

NCBI BLAST search of [GDIS\\_MOUSE](#) against nr

Unformatted [sequence string](#) for pasting into other applications

Taxonomy: [Mus musculus](#)

Variable modifications: Carbamidomethyl (C), Deamidated (NQ), Oxidation (M)

Cleavage by Trypsin: cuts C-term side of KR unless next residue is P

Sequence Coverage: 39%

Matched peptides shown in **Bold Red**

1 **TEKDAQPQLE EADDDLDL SKL NYKPPPQKSL** KELQEMDKDD ESLTKYKK**TL**  
51 **LGDVPVVADP TVPNVTVTRL SLVCDSAPGP ITMDLTGDLE ALKK**DTFVLK  
101 EGIEYRVKIN FKNKDIVSG **LKYVQHTYRT** GMRVDKATFM VGSYGPRPEE  
151 YEFLTPVEEA PKGMLARGTY HNKSFDTDDD KQDHLTWENW LAIKKDWTE

Show predicted peptides also

Sort Peptides By

Residue Number  Increasing Mass  Decreasing Mass

| Start - End | Observed  | Mr(expt)  | Mr(calc)  | ppm | Miss | Sequence                                                            |
|-------------|-----------|-----------|-----------|-----|------|---------------------------------------------------------------------|
| 4 - 19      | 1788.8712 | 1787.8639 | 1787.7697 | 53  | 0    | <b>K.DAQPQLEEADDDLDL SK.L</b> ( <a href="#">Ions score 16</a> )     |
| 20 - 28     | 1084.6661 | 1083.6588 | 1083.6077 | 47  | 0    | <b>K.LNYKPPPQK.S</b> ( <a href="#">Ions score 7</a> )               |
| 49 - 69     | 2163.3232 | 2162.3159 | 2162.1947 | 56  | 0    | <b>K.TLLGDVPVVADPTV PNVTVTR.L</b> ( <a href="#">Ions score 30</a> ) |
| 70 - 94     | 2644.5061 | 2643.4988 | 2643.3499 | 56  | 1    | <b>R.LSLVCDSAPGPITMDLTGDLEALKK.D</b> Carbamidomethyl (C)            |
| 123 - 129   | 966.5283  | 965.5210  | 965.4719  | 51  | 0    | <b>K.YVQHTYR.T</b> ( <a href="#">Ions score 31</a> )                |

Sample M23

4700 Reflector Spec #1 MC=>NR(2.00)[BP = 1515.8, 14221]

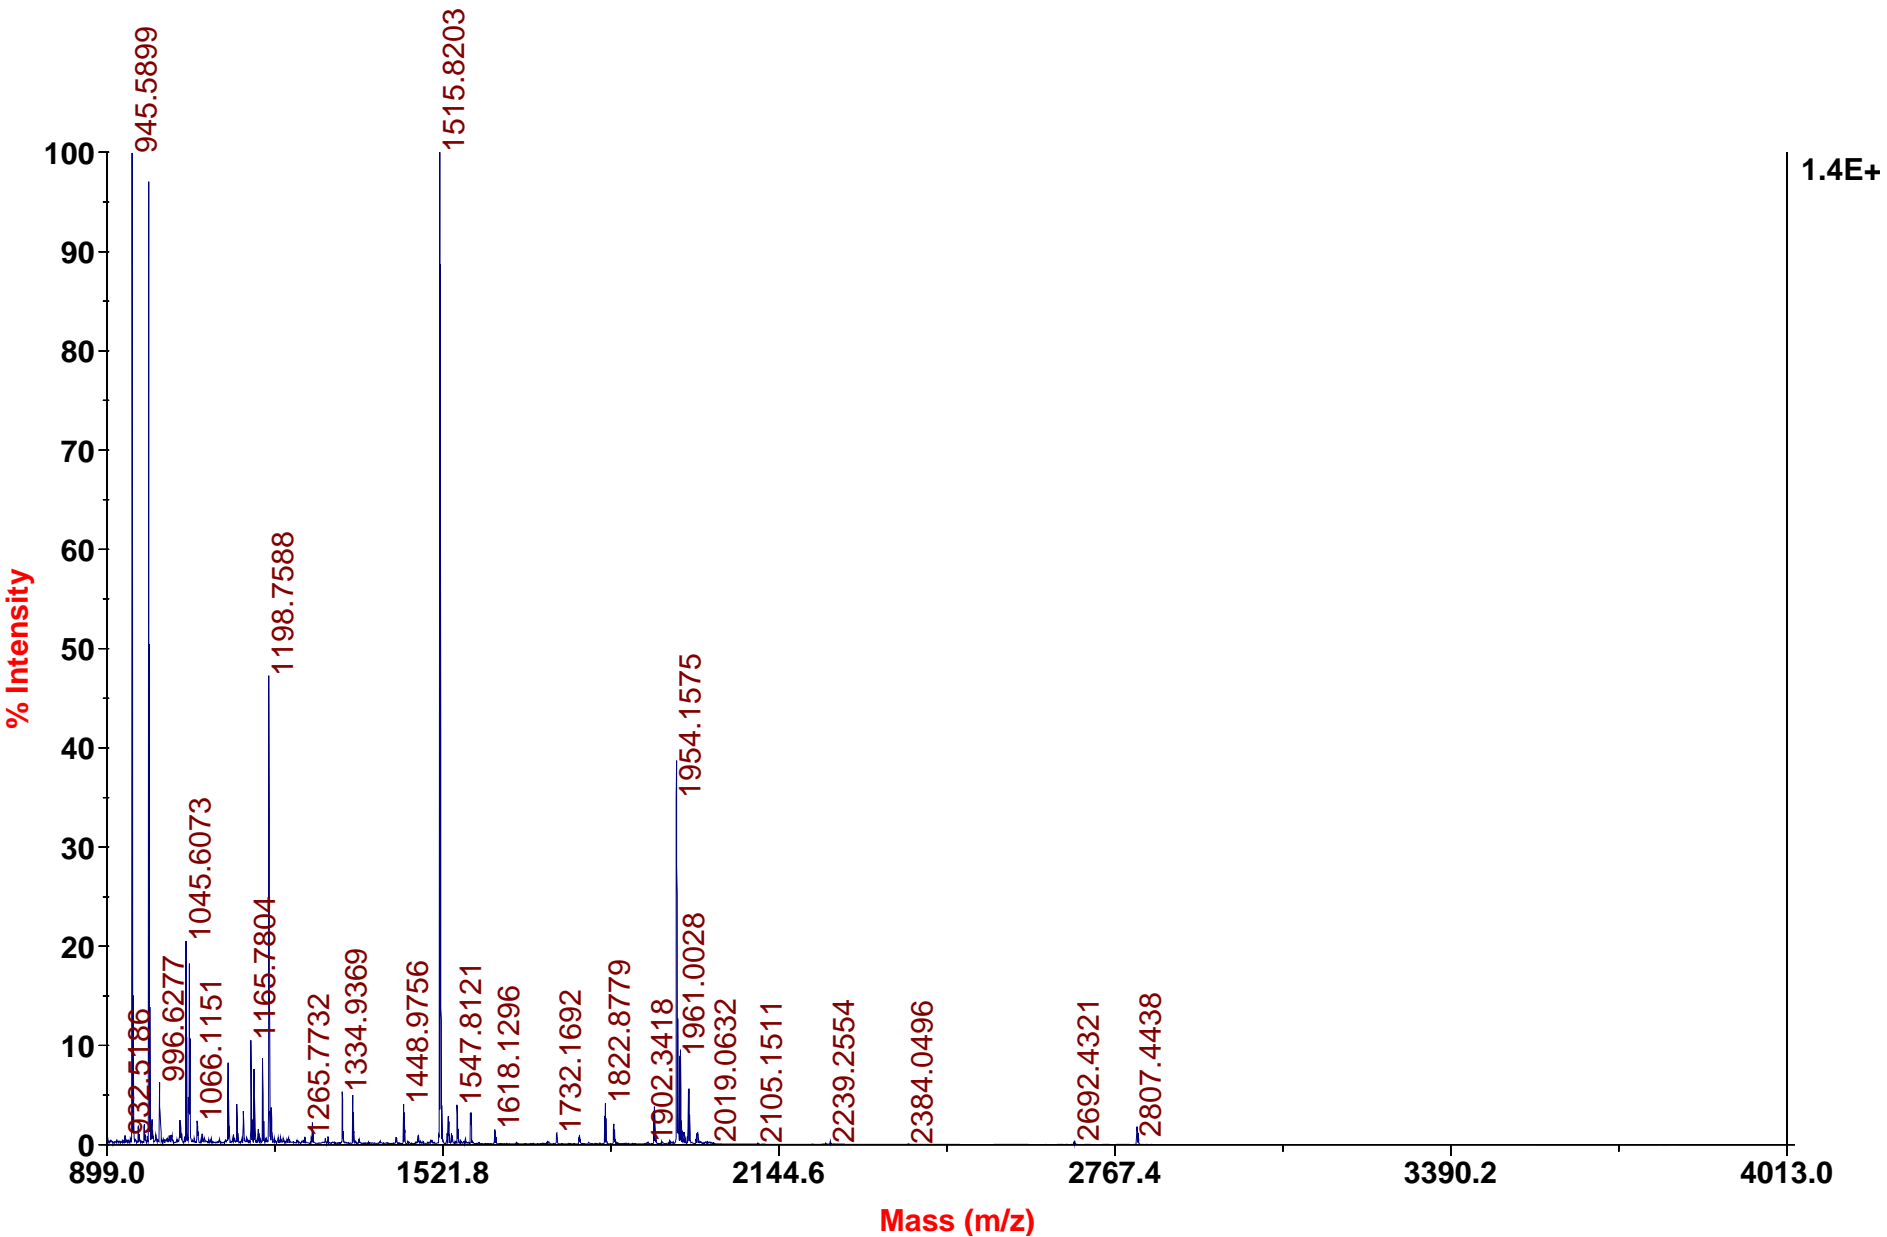

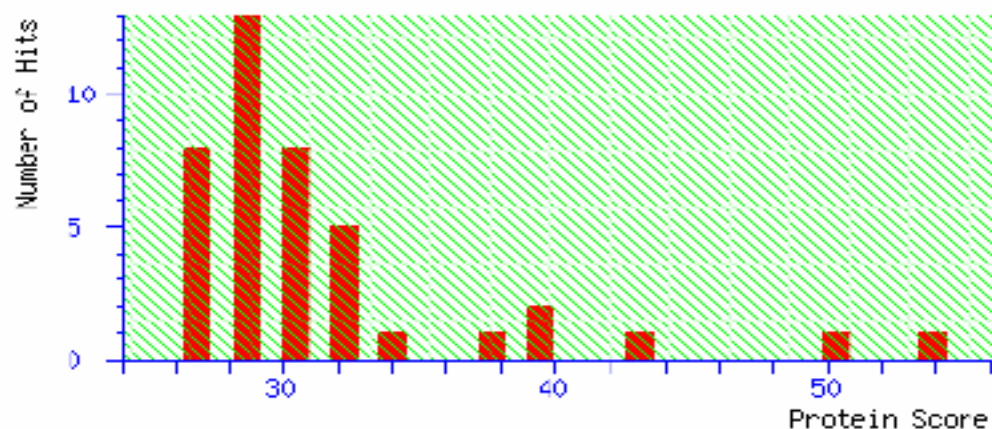

## Concise Protein Summary Report

[Help](#)

Significance threshold  $p <$

Max. number of hits

- [AAF99333](#)    **Mass:** 115840    **Score:** 54    **Expect:** 0.38    **Matches:** 29  
 AF289664 NID: - Mus musculus

[AAH39162](#)    **Mass:** 111802    **Score:** 49    **Expect:** 1.2    **Matches:** 26  
 BC039162 NID: - Mus musculus

[AAH53048](#)    **Mass:** 111787    **Score:** 48    **Expect:** 1.3    **Matches:** 26

## Protein View

Match to: **AAF99333** Score: **54** Expect: **0.38**

**AF289664** NID: - **Mus musculus**

Found in search of E:\Dekstop 30.5.2011\Muscle\Dekstop 2.5.11\Muscle DU\Muscle data  
\sample M23\pmf\_G6\_129990866106.txt

Nominal mass ( $M_r$ ): **115840**; Calculated pI value: **6.07**

NCBI BLAST search of [AAF99333](#) against nr

Unformatted [sequence string](#) for pasting into other applications

Taxonomy: [Mus musculus](#)

Links to retrieve other entries containing this sequence from NCBI Entrez:

(no taxonomy information for this entry)

(no taxonomy information for this entry)

Variable modifications: Carbamidomethyl (C), Deamidated (NQ), Oxidation (M)

Cleavage by Trypsin: cuts C-term side of KR unless next residue is P

Number of mass values searched: **83**

Number of mass values matched: **29**

Sequence Coverage: **24%**

Matched peptides shown in **Bold Red**

|      |                   |                   |                   |                   |                    |
|------|-------------------|-------------------|-------------------|-------------------|--------------------|
| 1    | <b>MQKPSGLKPP</b> | <b>GRGGKHSSPV</b> | GRPSVGSASS        | SVVASTSGSK        | EGSPLHKQAS         |
| 51   | GPSSSGAATT        | VSEKPGPKAA        | EVGDDFLGDF        | VVGERVWVNG        | VKPGVVQYLG         |
| 101  | ETQFAPGQWA        | GVVLDDPVGK        | NDGAVGGVRY        | FECPALQGIF        | TRPSKLTRQP         |
| 151  | TAEGSGSDTH        | SVESLTAQNL        | SLHSGTATPP        | LTGRVIPLRE        | SVLNSSVKTG         |
| 201  | NESGSNLSDS        | GSVKRGDKDL        | HLGDRVLVGG        | TKTGVVRYVG        | ETDFAK <b>GEWC</b> |
| 251  | <b>GVELDEPLGK</b> | NDGAVAGTRY        | FQCPPKFGFL        | APIHKVIRIG        | <b>FPSTSPAKAK</b>  |
| 301  | KTKRMAMGVS        | ALTHSPSSSS        | ISSVSSVASS        | VGGRPSRSGL        | LTETSSRYAR         |
| 351  | <b>KISGTTALQE</b> | <b>ALKEKQOHIE</b> | <b>QLLAERDLER</b> | AEVAKATSHI        | CEVEKEIALL         |
| 401  | KAQHEQYVAE        | AEEKLQRARL        | LVENVRKEKV        | DLSNQLEER         | RK <b>VEDLQFRV</b> |
| 451  | <b>EEESITKGD</b>  | ETQTQLEHAR        | <b>IGELEQSLLL</b> | <b>EKAQAERLLR</b> | ELADNRLTTV         |
| 501  | <b>AEKSRVLQLE</b> | <b>EELSLRRGEI</b> | EELQHCLLQS        | GPPPADHPEA        | AETLRLRERL         |
| 551  | LSASKEHQRD        | STLLQDKYEH        | MLKTYQTEVD        | KLRAANEKYA        | <b>QEVADLKAKV</b>  |
| 601  | QQATTENMGL        | MDNWKSKLDS        | LASDHQKSLE        | DLKATLNSGP        | <b>GAQQKEIGEL</b>  |
| 651  | <b>KALVEGIKME</b> | <b>HQLELGNLQA</b> | <b>KHDLETAMHG</b> | <b>KEKEGLRQKL</b> | <b>QEVQEELAGL</b>  |
| 701  | <b>QQHWREQLEE</b> | <b>QASQHRLELQ</b> | <b>EAQDQCRDAQ</b> | <b>LRAQELEGLD</b> | <b>VEYRGQAQAI</b>  |
| 751  | <b>EFLKEQISLA</b> | <b>EKKMLDYEML</b> | QRAEAQSRQE        | AERLREKLLV        | AENRLQAAES         |
| 801  | LCSAQHSHVI        | ESSDLSEETI        | <b>RMKETVEGLQ</b> | <b>DKLNKRDKEV</b> | TALTSQMDML         |
| 851  | RAQVSALENK        | CKSGEKKIDS        | <b>LLKEKRRLEA</b> | ELEAVSRKTH        | DASGQLVHIS         |
| 901  | QELLRKERSL        | NELRVLLLEA        | NRHSPGPERD        | LSREVVHKAEW       | RIKEQKLKDD         |
| 951  | IRGLREKLTG        | <b>LDKEKSLSEQ</b> | <b>RRYSLIDPAS</b> | <b>PELLLKLQHQ</b> | <b>LVSTEDALRD</b>  |
| 1001 | <b>ALNQAQQVER</b> | <b>LVEALRGCSD</b> | RTQTISNSGS        | ANGIHQPDKA        | HKQEDKH            |

# M23

4700 MS/MS Precursor 976.488 Spec #1 MC[BP = 343.2, 2779]

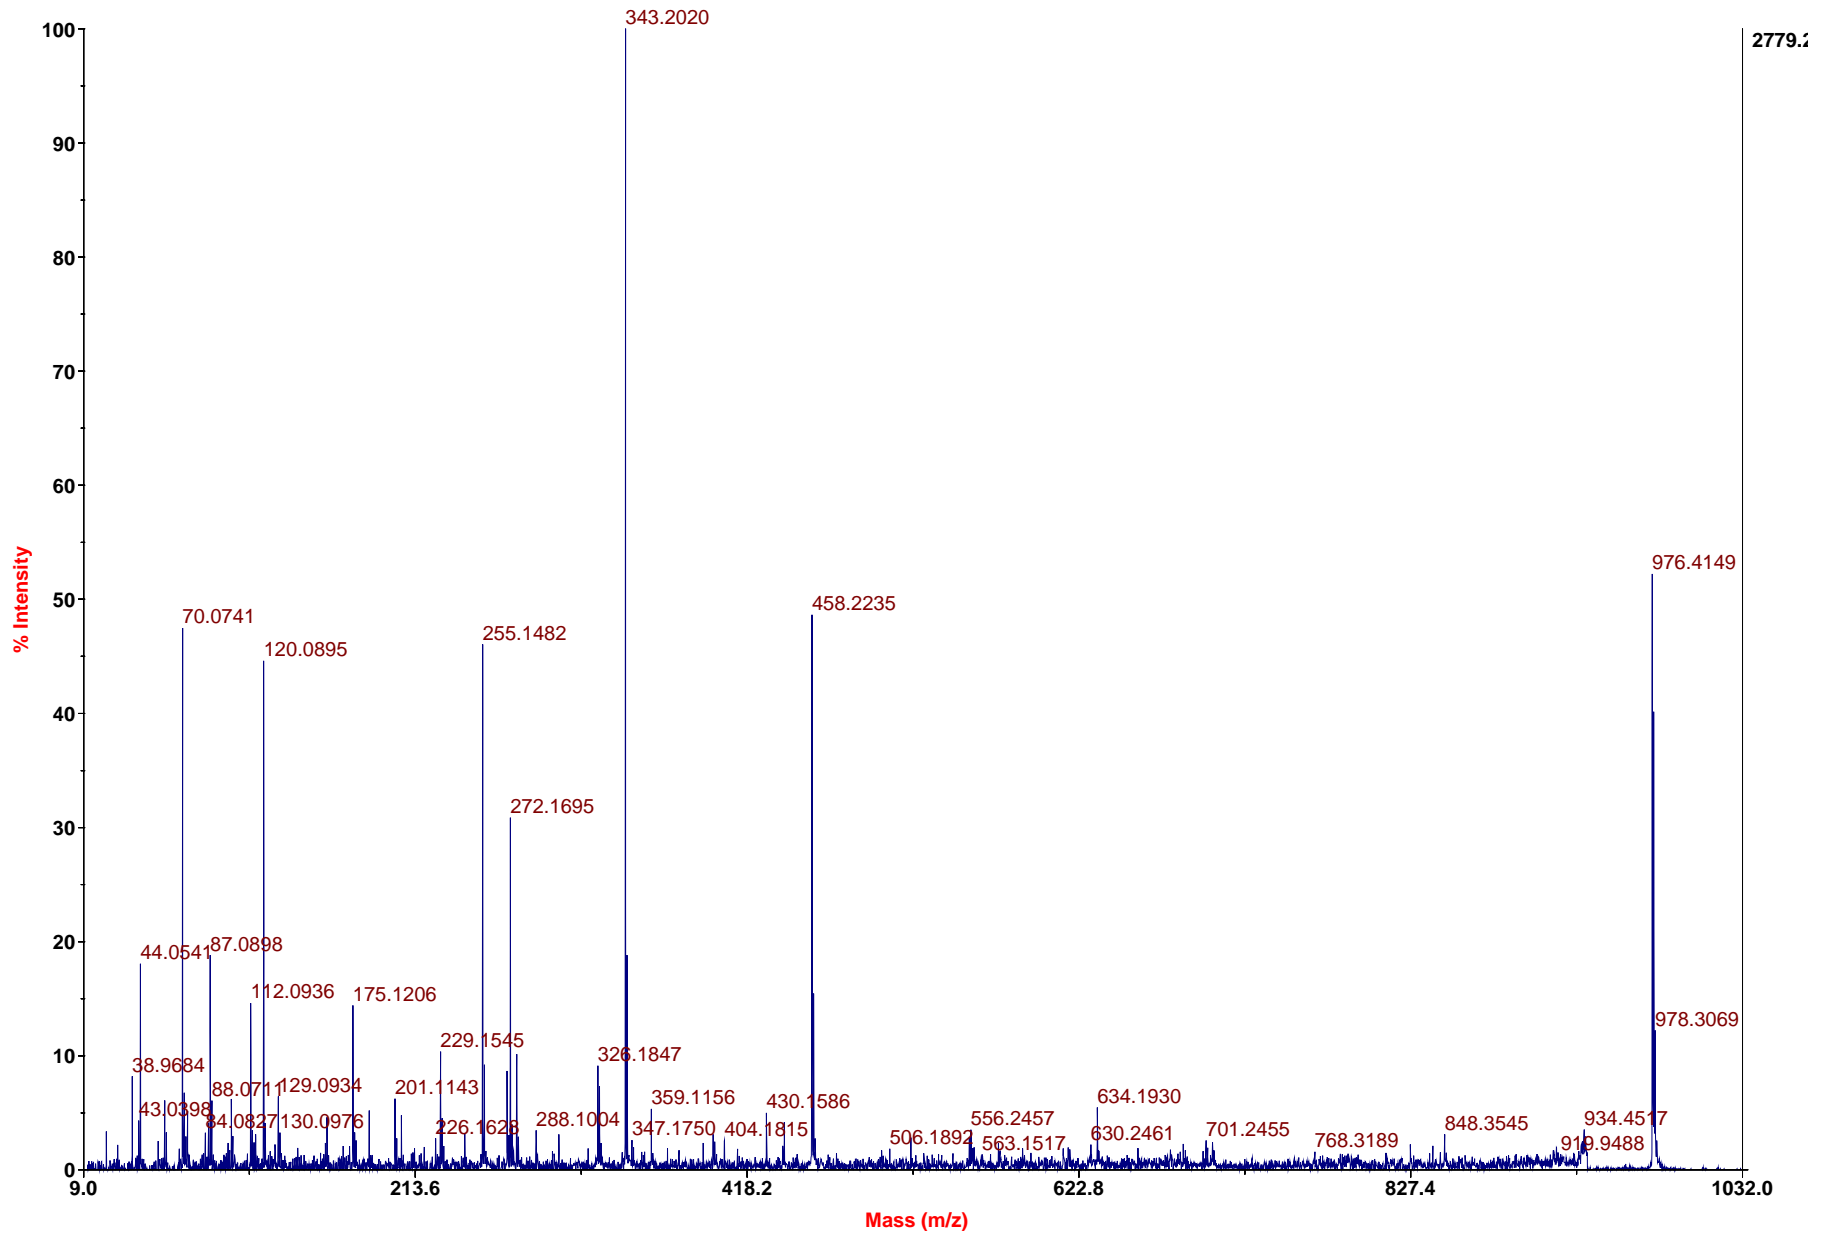

# M23

4700 MS/MS Precursor 1045.61 Spec #1 MC[BP = 860.9, 2224]

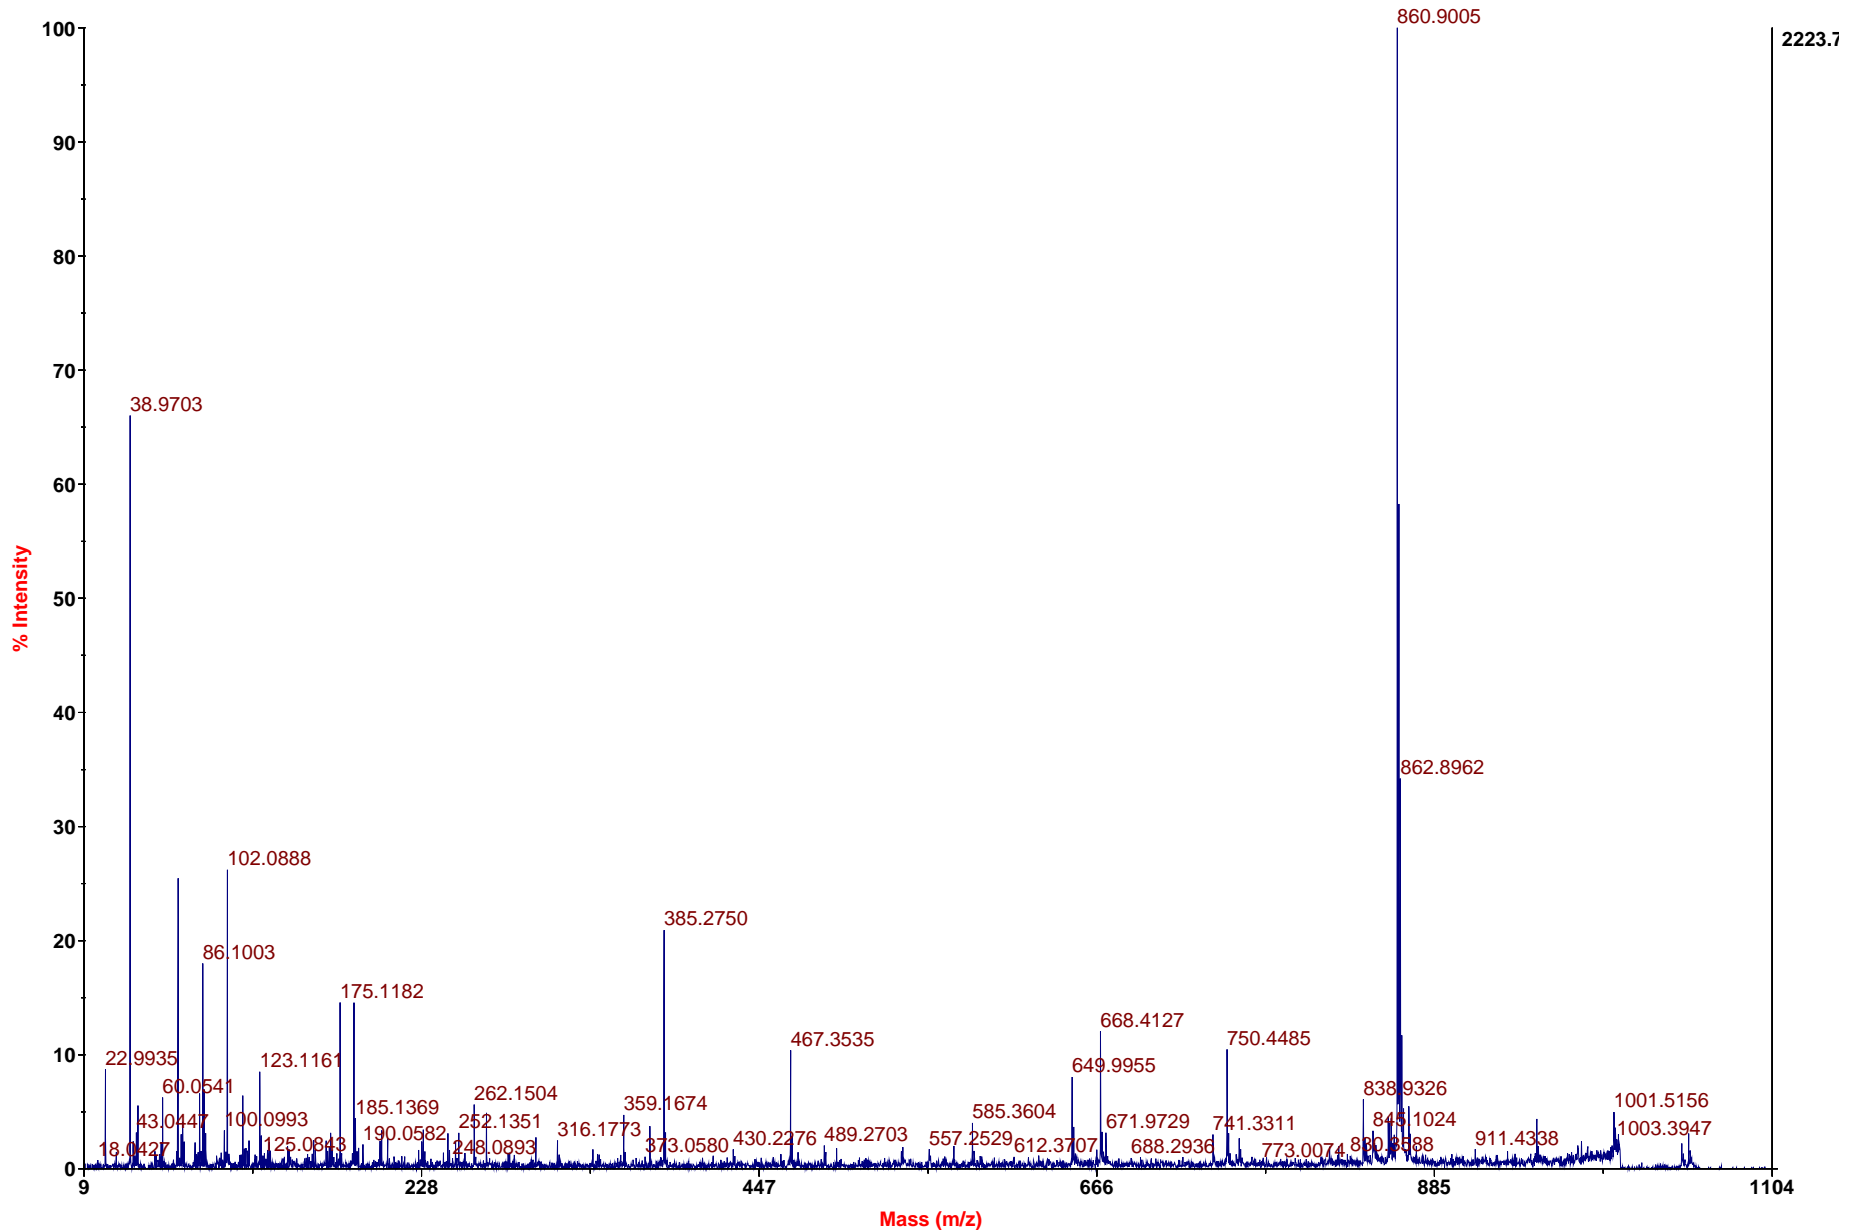

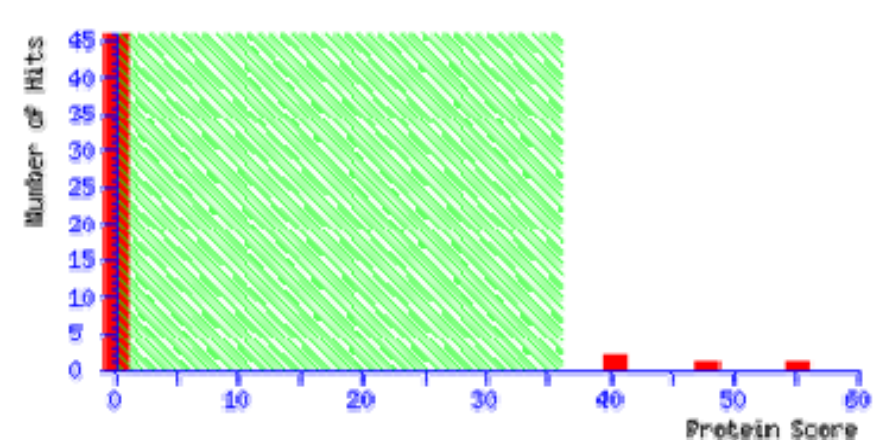

## Peptide Summary Report

Format As

Peptide Summary

[Help](#)

Significance threshold  $p <$

Max. number of hits

Standard scoring  MudPIT scoring

Ions score or expect cut-off

Show sub-sets

Show pop-ups  Suppress pop-ups

Sort unassigned

Require bold red

Select All

Select None

Search Selected

Error tolerant

1. [CAA27396](#) Mass: 39161 Score: 55 Matches: 5(3) Sequences: 5(3) emPAI: 0.59

MMACTBR2 NID: - Mus musculus

Check to include this hit in error tolerant search

| Query                                                  | Observed  | Mr(expt)  | Mr(calc)  | ppm  | Miss | Score | Expect | Rank | Unique | Peptide                |
|--------------------------------------------------------|-----------|-----------|-----------|------|------|-------|--------|------|--------|------------------------|
| <input checked="" type="checkbox"/> <a href="#">1</a>  | 945.5899  | 944.5826  | 944.5444  | 40.5 | 0    | 42    | 0.014  | 1    | U      | R.AVFPSIVGR.S          |
| <input checked="" type="checkbox"/> <a href="#">8</a>  | 1171.6173 | 1170.6100 | 1170.5638 | 39.5 | 0    | 42    | 0.017  | 1    |        | R.HQGVVMVGMGQK.D       |
| <input checked="" type="checkbox"/> <a href="#">12</a> | 1354.6886 | 1353.6813 | 1353.6161 | 48.2 | 1    | 27    | 0.6    | 1    |        | K.DSYVGDEAQSKR.G       |
| <input checked="" type="checkbox"/> <a href="#">14</a> | 1515.8197 | 1514.8124 | 1514.7419 | 46.6 | 0    | 18    | 4.4    | 1    |        | K.IWHHTFYNELR.V        |
| <input checked="" type="checkbox"/> <a href="#">26</a> | 1954.1547 | 1953.1474 | 1953.0571 | 46.2 | 0    | 37    | 0.032  | 1    |        | R.VAPEEHPVLLTEAPLNPK.A |



## Protein View

Match to: [CAA27396](#) Score: 55

MMACTBR2 NID: - *Mus musculus*

Found in search of ppw\_G6\_129990872106.txt

Nominal mass ( $M_r$ ): 39161; Calculated pI value: 5.78

NCBI BLAST search of [CAA27396](#) against nr

Unformatted [sequence string](#) for pasting into other applications

Taxonomy: [Mus musculus](#)

Links to retrieve other entries containing this sequence from NCBI Entrez:  
(no taxonomy information for this entry)

Variable modifications: Carbamidomethyl (C), Deamidated (NQ), Oxidation (M)

Cleavage by Trypsin: cuts C-term side of KR unless next residue is P

Sequence Coverage: 17%

Matched peptides shown in **Bold Red**

```
1  PRAVFPSIVG RSRHQGMVG MGQKDSYVGD EAQSKRGILT LKYPIEHGIV
51  TNWDDMEKIW HHTFYNELRV APEEHPVLLT EAPLNPKANR EKMTQIMFET
101 FNTPAMYVAI QAVLSLYASG RTTGIVMDSG DGVTHTVPIY EGYALPHAIL
151 RLDLAGRDLT DYLKILTER GYSFTTTAER EIVRDIKEKL CYVALDFEQE
201 MATAASSSSL EKSYELPDGQ VITIGNERFR CPEALFQPSF LGMESCGIHE
251 TTFNSIMKCD VDIRKDLYAN TVLSGGTMY PGIADRMQKE ITALAPSTMK
301 IKIIAPPERK YSVWIGGSIL ASLSTFQQMW ISKQEQYDESG PSIVHRKCF
```

Show predicted peptides also

Sort Peptides By

Residue Number  Increasing Mass  Decreasing Mass

| Start - End    | Observed         | Mr(expt)         | Mr(calc)         | ppm       | Miss     | Sequence                                                        |
|----------------|------------------|------------------|------------------|-----------|----------|-----------------------------------------------------------------|
| <b>3 - 11</b>  | <b>945.5899</b>  | <b>944.5826</b>  | <b>944.5444</b>  | <b>41</b> | <b>0</b> | <b>R.AVFPSIVGR.S</b> ( <a href="#">Ions score 42</a> )          |
| <b>14 - 24</b> | <b>1171.6173</b> | <b>1170.6100</b> | <b>1170.5638</b> | <b>39</b> | <b>0</b> | <b>R.HQGMVGMGQK.D</b> ( <a href="#">Ions score 42</a> )         |
| <b>25 - 36</b> | <b>1354.6886</b> | <b>1353.6813</b> | <b>1353.6161</b> | <b>48</b> | <b>1</b> | <b>K.DSYVGDEAQSKR.G</b> ( <a href="#">Ions score 27</a> )       |
| <b>59 - 69</b> | <b>1515.8197</b> | <b>1514.8124</b> | <b>1514.7419</b> | <b>47</b> | <b>0</b> | <b>K.IWHHTFYNELR.V</b> ( <a href="#">Ions score 18</a> )        |
| <b>70 - 87</b> | <b>1954.1547</b> | <b>1953.1474</b> | <b>1953.0571</b> | <b>46</b> | <b>0</b> | <b>R.VAPEEHPVLLTEAPLNPK.A</b> ( <a href="#">Ions score 37</a> ) |



# Sample M24

4700 Reflector Spec #1 MC=>NR(2.00)[BP = 1475.8, 16515]

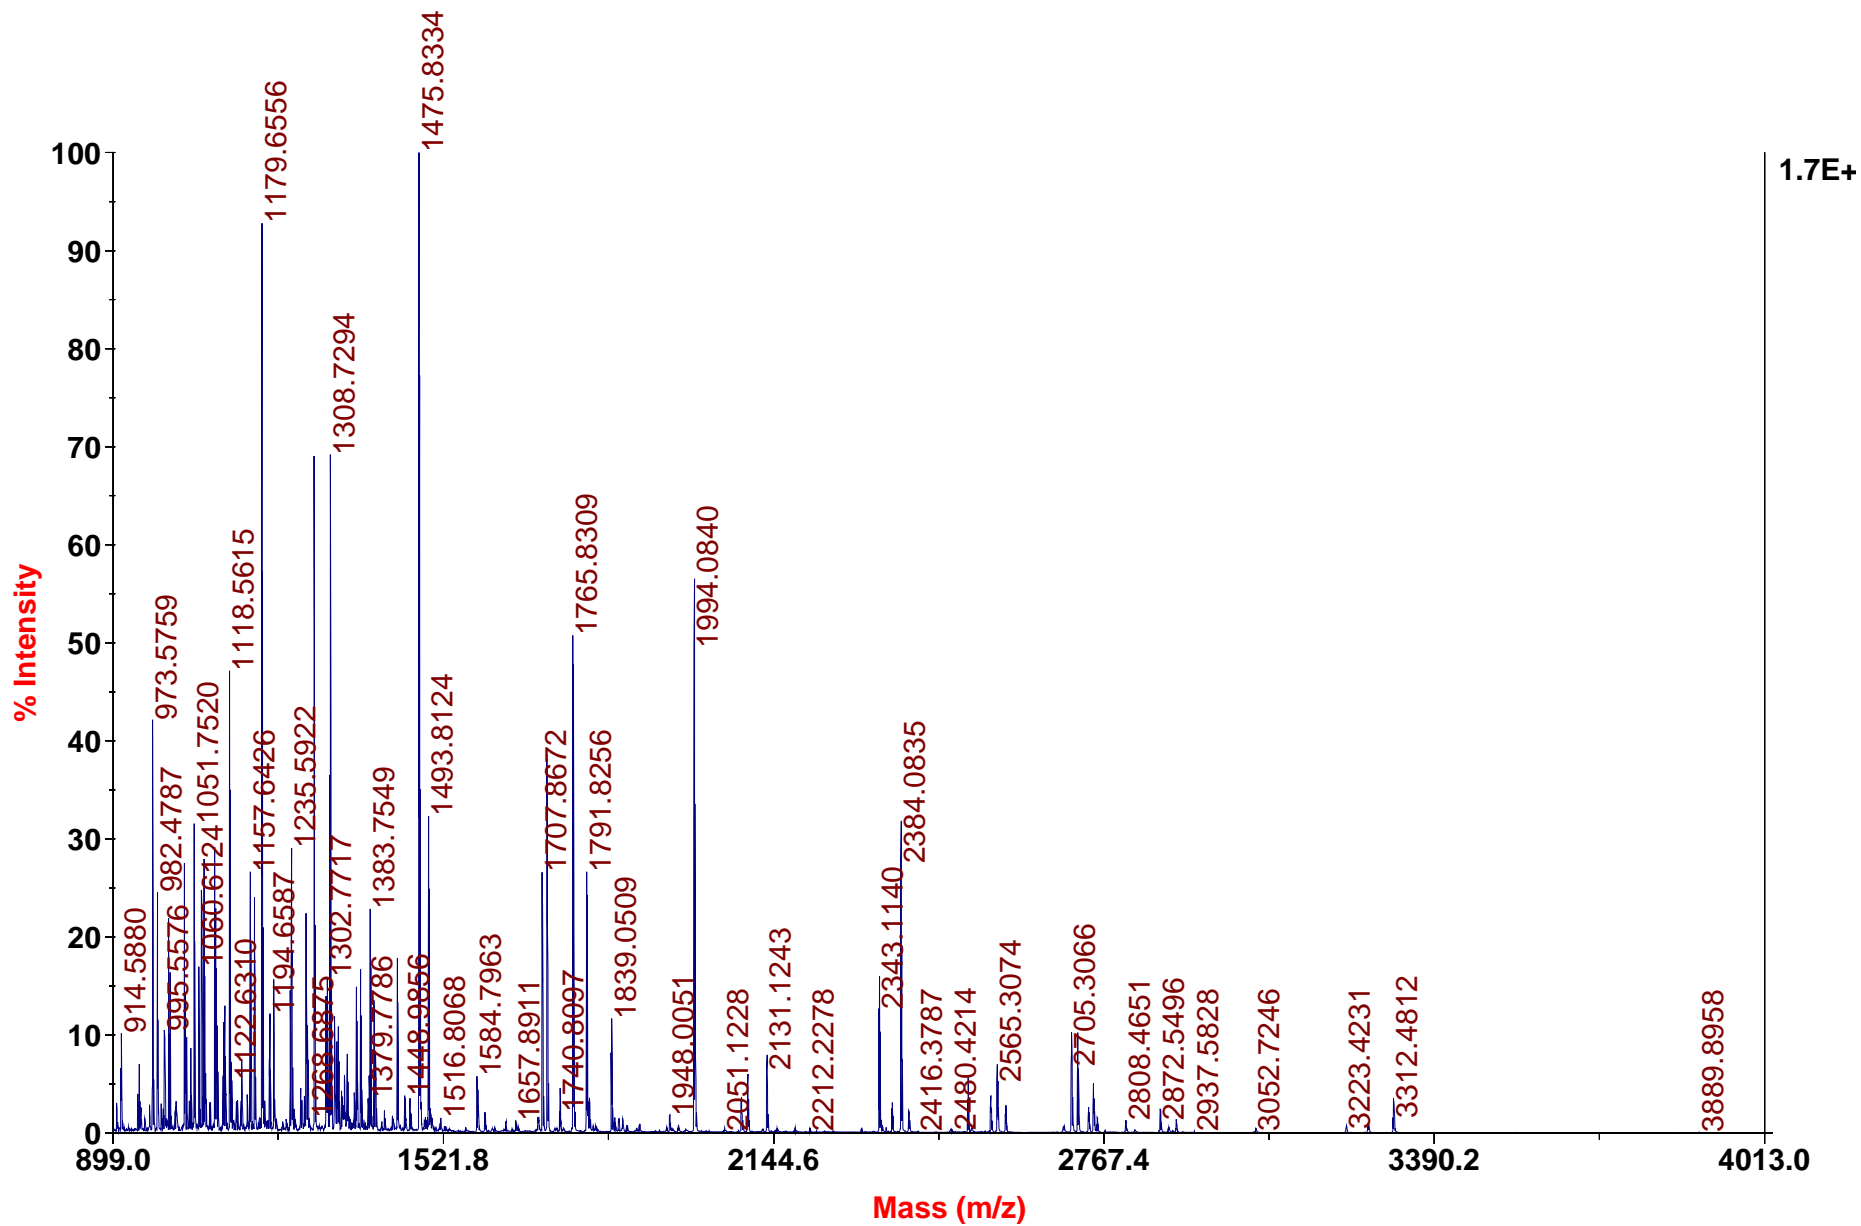

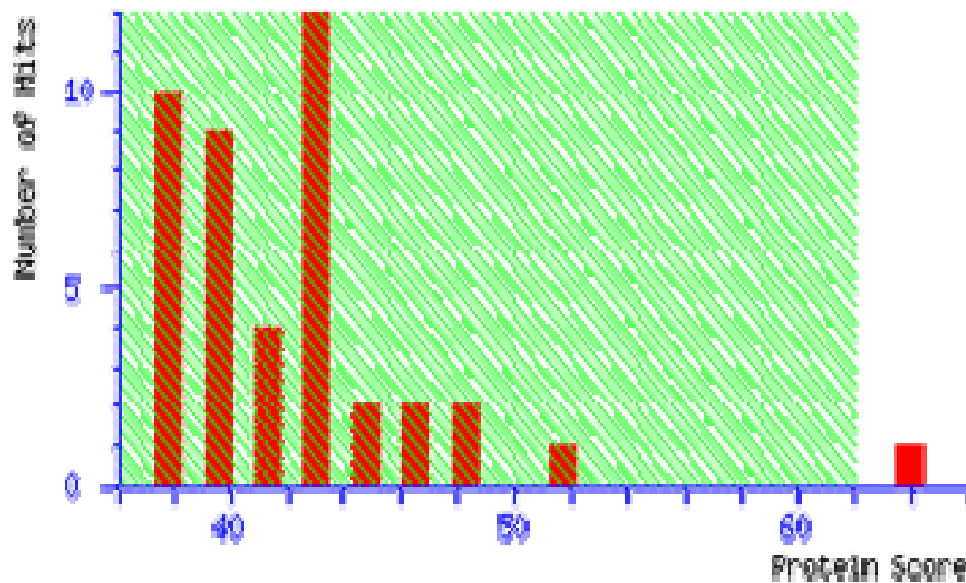

## Concise Protein Summary Report

Format As

Concise Protein Summary

[Help](#)

Significance threshold  $p <$

Max. number of hits

- [Q6ZQK2 MOUSE](#)    **Mass:** 191193    **Score:** 64    **Expect:** 0.038    **Matches:** 65  
 MKIAA0051 protein (Fragment).- Mus musculus (Mouse).

[Q8CGH5 MOUSE](#)    **Mass:** 106421    **Score:** 51    **Expect:** 0.72    **Matches:** 45  
 Iqgap1 protein (Fragment).- Mus musculus (Mouse).

## Protein View

Match to: **Q6ZQK2\_MOUSE** Score: 64 Expect: 0.038  
**MKIAA0051** protein (Fragment). - **Mus musculus (Mouse)**.  
 Found in search of pmf\_H6\_129990866107.txt

Nominal mass ( $M_r$ ): 191193; Calculated pI value: 6.15  
 NCBI BLAST search of **Q6ZQK2\_MOUSE** against nr  
 Unformatted [sequence string](#) for pasting into other applications

Taxonomy: [Mus musculus](#)  
 Links to retrieve other entries containing this sequence from NCBI Entrez:  
 (no taxonomy information for this entry)

Variable modifications: Carbamidomethyl (C), Deamidated (NQ), Oxidation (M)  
 Cleavage by Trypsin: cuts C-term side of KR unless next residue is P  
 Number of mass values searched: 180  
 Number of mass values matched: 65  
 Sequence Coverage: 37%

Matched peptides shown in **Bold Red**

```

1 LLLLRSPASS RSLRFLTGD L DSAAMSAEEE VDGLGVVRPH YGSVLDNERL
51 TAEEMDERRR QNVAYEYLCH LEEAKRWMEA CLGEDLPPTT ELEEGLRNGV
101 YLAKLGNFFS PKVVSLKKIY DREQTRYKAT GLHFRHTDNV IQWLNAMDEI
151 GLPKIFYPET TDIYDRKNMP RCIYCIHALS LYLFKLG LGLAP QIODLYGKVD
201 FTEEEINNMK IEEKYIQM PAFSKIGGIL ANELSVDEAA LHAAVIAINE
251 AIDRRVAADT FTALKPNP NAM LVNLEEGLAP TYQDVLYQAK QDKMTN AKNR
301 TENSDRERDV YEELLTQAEI QGNVNKVN TS SALANISLAL EOGCAV TLLK
351 ALQSLALGLR GLQTSNDWY MKQLQSDLQQ KRQSGQTDPL QKEEVQAGVD
401 AANSAAQQYQ RRLAAVAAIN AAIQKGI A EK TVLELMNPEA QLPQVY PFAA
451 DLYQKELATL QQQSPEHSLT HPELTVAVEM LSSVALINRA LESGDM TTVW
501 KQLSSSVTGL TNIEEENCQR YLDELMLKKA QAHAENNAFI TWNDIQACVD
551 HVNLLVHHEH ERILAIGLIN EALDEGDAQK TLQALQIPAA KLEGV LAEVA
601 QHYQDTLIRA KREKAQETQD ESAVLWLDEI QGGIWQSNKD TQEAQR FALG
651 ISAINAEVDS GDVGR TLSAL RSPDVGLYGV IPECGETYRS DLAEAKKKRL
701 AAGDNN SKWV KHVVKGGYHY YHNLETQAGG WAEPFDFVQN SVQLS REEIQ
751 SSISGVTAAY NREQLWLANE GLITKLQACC RGYLVRQEFR SRMNF LKKQI
801 PAITCIQSQW RGYKQKKAYQ DRLAYLHSHK DEVVKIQSLA RMHQARKRYR
851 DRLOQYFRDHI NDIKIQA F I RANKARDDYK TLINAEDPPM IVVRKFVHLL
901 DQSDQDFQEE LDLMKMREEV ITLIRSNQQL ENDLNLMDIK IGLIVKNKIT
951 LQDVVSHSKK LTKKNKEQLS DMMMINKQKG GLKALSKEKR EKLEAYQHLE
1001 YLLQTNPTYL AKLIFQMPQN KSTLIFMDSVI FTLYNYASNQ REEYLLRLR
1051 QTALQEEIKS KVDQIQEIVT GNPTVIKMOV SFNRGARGQN ALRQILAPVV
1101 KEIMDDKSLN IKTD PVDIYK SWVNQMESQT GEASKLPYDV TPEQALSHEE
1151 VKTRLDNSIR NMRVATDKEL SAIVSSVDKI PYGMRFI AKV LKDSLHEKFP
1201 DAGEDELLKI IGNLLYYRYM NPAIVAFDAF DIIDLSAGGQ LTTDQRRNLG
1251 SIAKMLQHAA SNKMF LGDNA HLSIINEYLS QSYQKFR RFF QVACDVPELQ
1301 DKFNVDEYSD LVTLT KPVYI ISIGEINTH TLLLDHQDAI AFEHNDPIHE
1351 LLDDLGEVPT IESLIGESCG NSNDPNKEAL AKTEVSLTLT NKFDVPGDEN
1401 AEMDARTILL NTKRLIVDVI RFQPGETL TE ILETPATNEQ EAEHQRAMQR
1451 RAIRDAKTPD KMKKSKPMKE DNNLSLQ EKK EKIQTGLKKL TELGTVDFPN
1501 RYQELINDIA KDIRNQRRYR QRRKAELVKL QQTYSALNSK ATFYGEQVDY
1551 YKSYIKTKLD NLASGK VSK KPREMKGKKS KKI SLKYTAA RLHEKGV LLE
1601 IEDLQANQFK NVIFEIGPTE EVGDFEVKAK FMGVQMETFM LHYQDLLQLQ
1651 YEGVAVMKLF DRAKVN VNLL IFLLNKKFYG K
  
```

Show predicted peptides also

Sort Peptides By

Residue Number  Increasing Mass  Decreasing Mass

| Start | End | Observed  | $M_r$ (expt) | $M_r$ (calc) | ppm | Miss | Sequence                       |
|-------|-----|-----------|--------------|--------------|-----|------|--------------------------------|
| 50    | 58  | 1109.5443 | 1108.5370    | 1108.4706    | 60  | 0    | R.LTAEEMDER.R Oxidation (M)    |
| 50    | 59  | 1265.7042 | 1264.6969    | 1264.5717    | 99  | 1    | R.LTAEEMDERR.R Oxidation (M)   |
| 61    | 75  | 1868.0181 | 1867.0108    | 1866.8458    | 88  | 0    | R.QNVAYEYLCHLEEK.R Carbamido   |
| 119   | 126 | 1081.5437 | 1080.5364    | 1080.5200    | 15  | 1    | K.IYDREQTR.Y Deamidated (NQ)   |
| 127   | 135 | 1092.5634 | 1091.5561    | 1091.5876    | -29 | 1    | R.YKATGLHFR.H                  |
| 168   | 185 | 2315.2419 | 2314.2346    | 2314.1424    | 40  | 1    | K.NMPCRCIYCIHALSLYLFK.L 2 Carb |

# M24

4700 MS/MS Precursor 1051.75 Spec #1 MC[BP = 102.1, 1283]

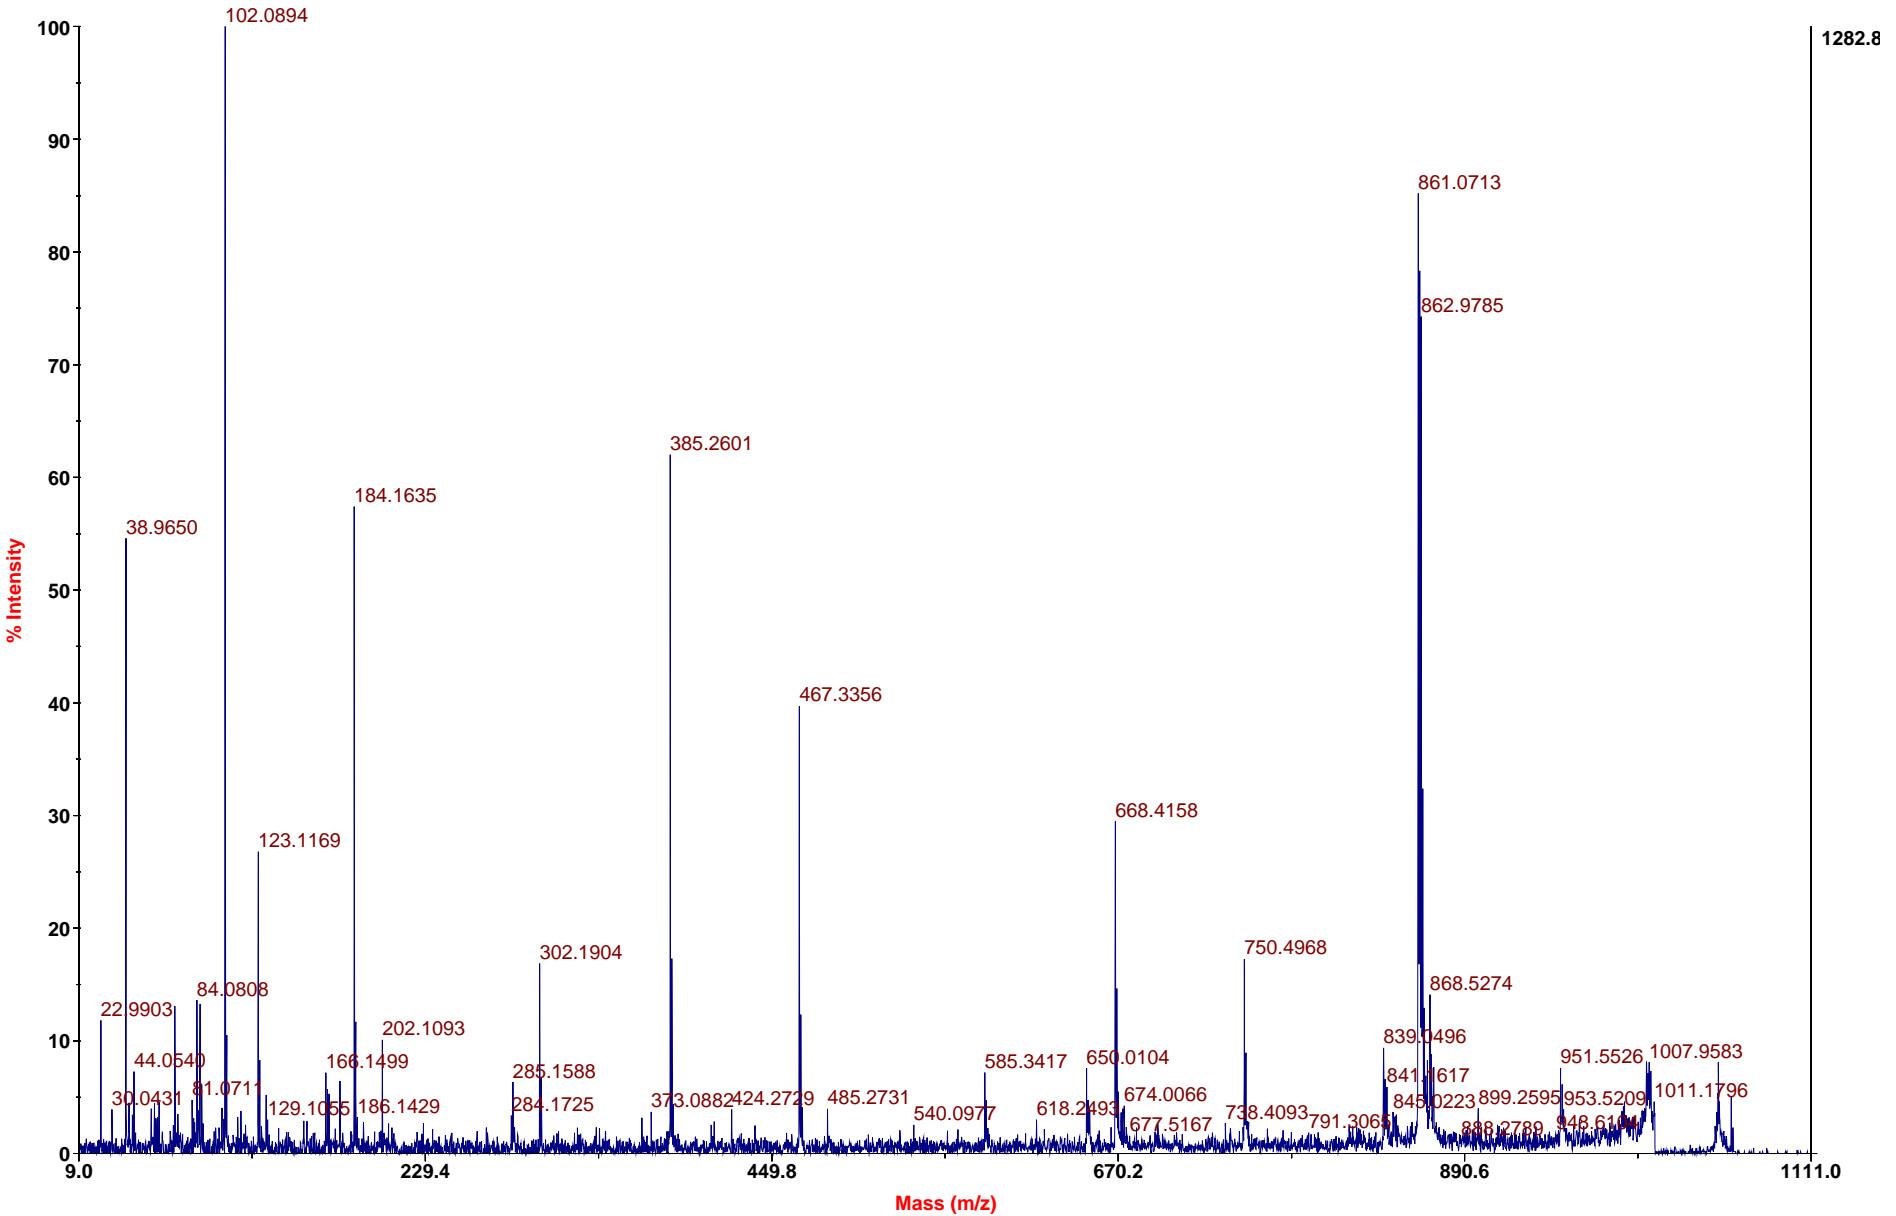

# M24

4700 MS/MS Precursor 1090.58 Spec #1 MC[BP = 175.1, 1795]

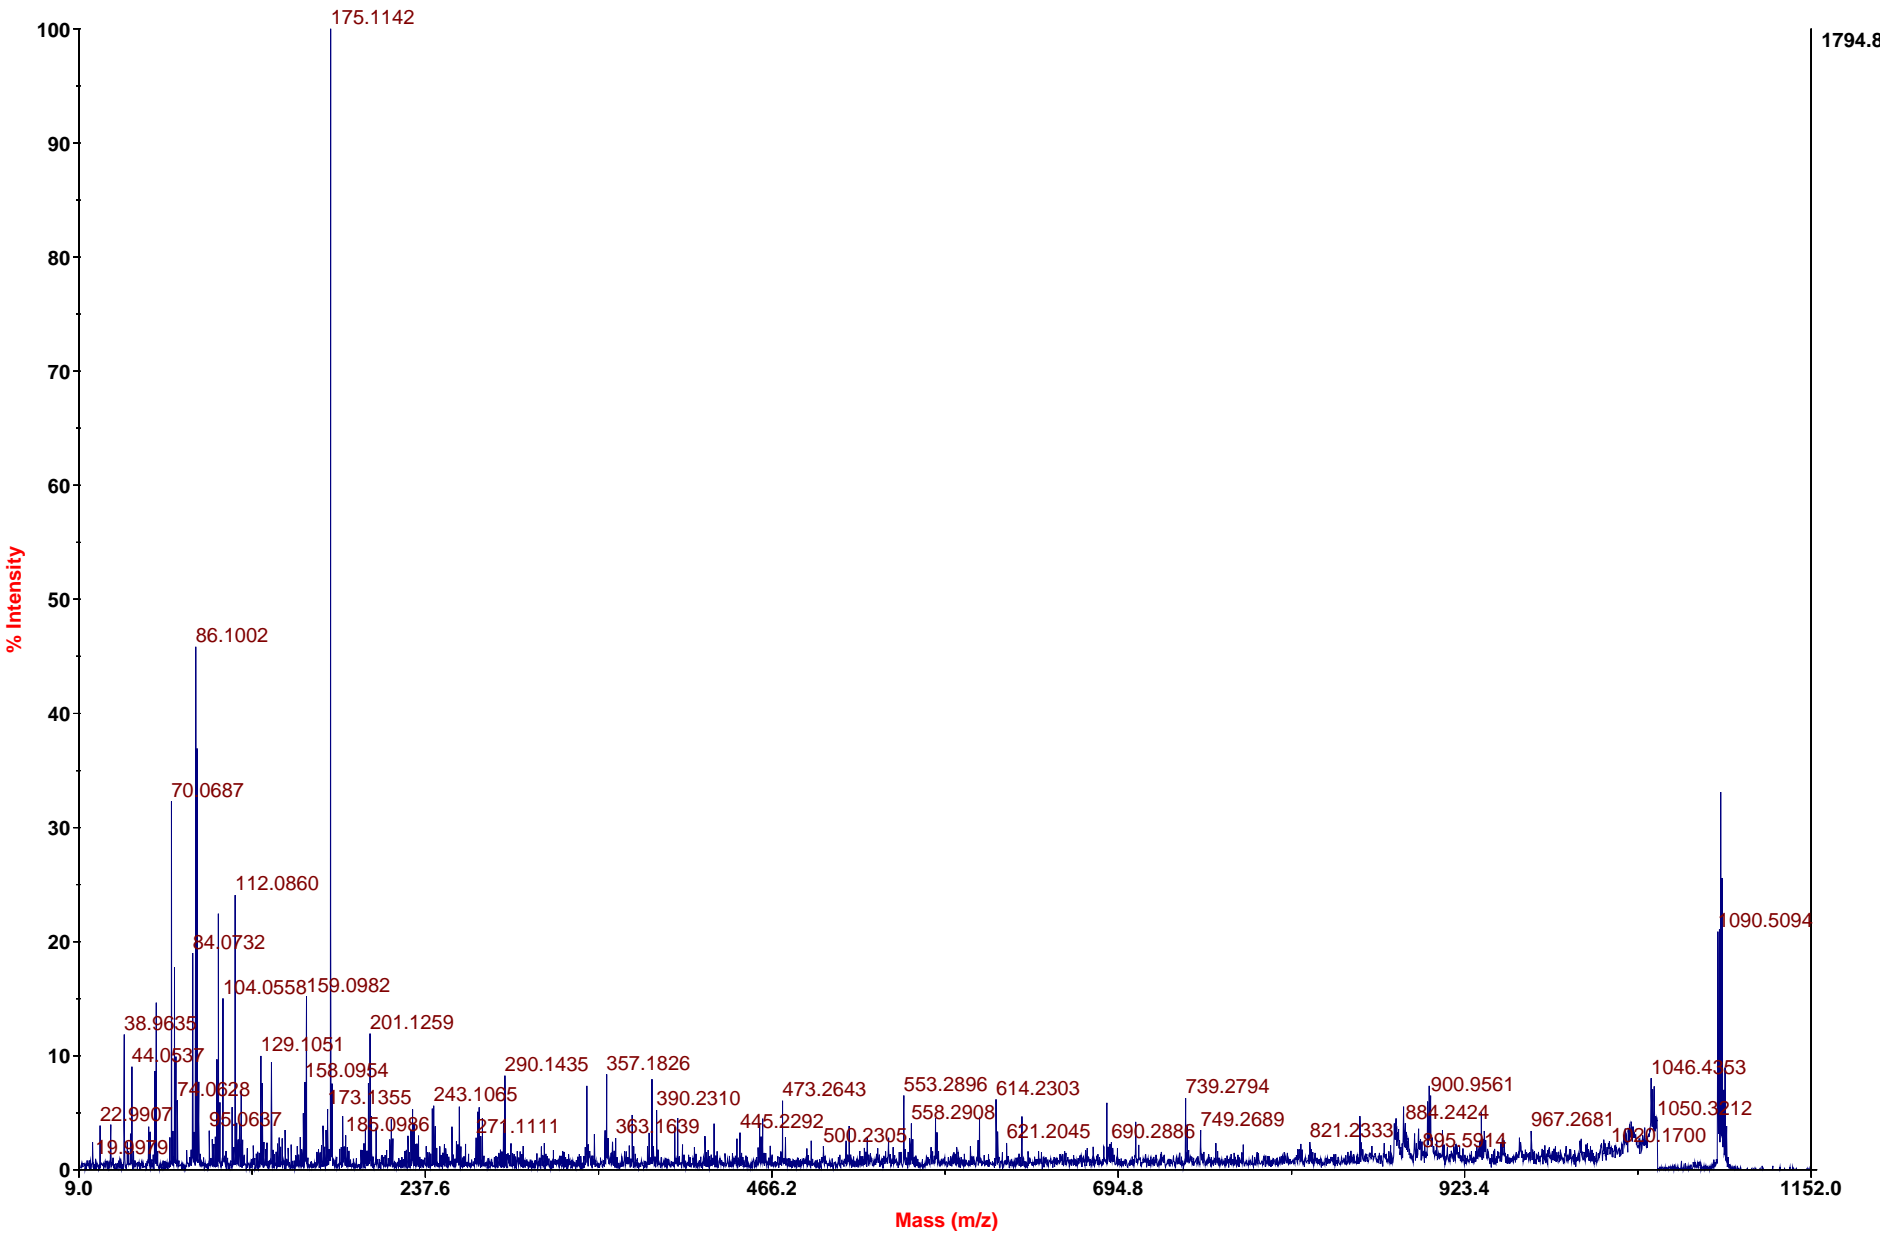

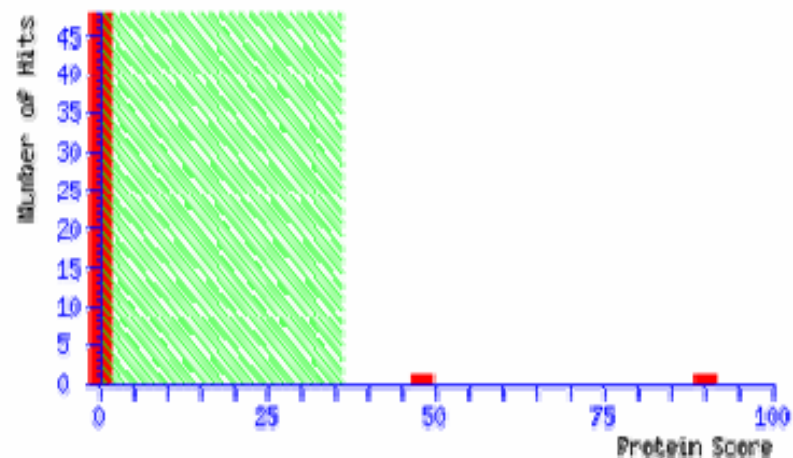

## Peptide Summary Report

Format As

Peptide Summary

[Help](#)

Significance threshold  $p <$

Max. number of hits

Standard scoring  MudPIT scoring  Ions score or expect cut-off

Show sub-sets

Show pop-ups  Suppress pop-ups  Sort unassigned

Require bold red

Select All

Select None

Search Selected

Error tolerant

1. [Q3TK56\\_MOUSE](#) Mass: 10117 Score: 90 Matches: 2(1) Sequences: 2(1) emPAI: 0.70

Blastocyst blastocyst cdna, RIKEN full-length enriched library, clone:11C0034H10 product:actin related protein 2/

Check to include this hit in error tolerant search

| Query                                                  | Observed  | Mr(expt)  | Mr(calc)  | ppm  | Miss | Score | Expect | Rank | Unique | Peptide                        |
|--------------------------------------------------------|-----------|-----------|-----------|------|------|-------|--------|------|--------|--------------------------------|
| <input checked="" type="checkbox"/> <a href="#">4</a>  | 1070.6798 | 1069.6725 | 1069.6244 | 45.0 | 0    | 16    | 2.5    | 1    | U      | <b>K.ALAAGGVGSIVR.V</b>        |
| <input checked="" type="checkbox"/> <a href="#">44</a> | 2131.1230 | 2130.1157 | 2130.0018 | 53.5 | 0    | 90    | 3e-07  | 1    | U      | <b>K.GFESPSDNSSAVLLQWHEK.A</b> |

## Protein View

Match to: Q3TK56\_MOUSE Score: 90

Blastocyst blastocyst cDNA, RIKEN full-length enriched library, clone:I1C0034H10 product:actin related protein 2/3

Found in search of ppw\_H6\_129990872207.txt

Nominal mass ( $M_r$ ): 10117; Calculated pI value: 9.79

NCBI BLAST search of [Q3TK56\\_MOUSE](#) against nr

Unformatted [sequence string](#) for pasting into other applications

Taxonomy: [Mus musculus](#)

Links to retrieve other entries containing this sequence from NCBI Entrez:

(no taxonomy information for this entry)

Variable modifications: Carbamidomethyl (C), Deamidated (NQ), Oxidation (M)

Cleavage by Trypsin: cuts C-term side of KR unless next residue is P

Sequence Coverage: 32%

Matched peptides shown in **Bold Red**

1 ALKNPPINTK SQAVKDRAGS IVLKVLI~~SFK~~ ANDIEKAVQS LDKNGVDLLM

51 KYIYK**GFESP SDNSSAVLLQ WHEKALAAGG VGSIVR**VLTA RKTV

Show predicted peptides also

Sort Peptides By

Residue Number  Increasing Mass  Decreasing Mass

| Start - End | Observed  | Mr(expt)  | Mr(calc)  | ppm | Miss | Sequence                                                           |
|-------------|-----------|-----------|-----------|-----|------|--------------------------------------------------------------------|
| 56 - 74     | 2131.1230 | 2130.1157 | 2130.0018 | 53  | 0    | K.GFESP <b>SDNSSAVLLQWHEK</b> .A ( <a href="#">Ions score 90</a> ) |
| 75 - 86     | 1070.6798 | 1069.6725 | 1069.6244 | 45  | 0    | K. <b>ALAAGGVGSIVR</b> .V ( <a href="#">Ions score 16</a> )        |

# Sample M25

4700 Reflector Spec #1 MC=>NR(2.00)[BP = 2785.5, 12229]

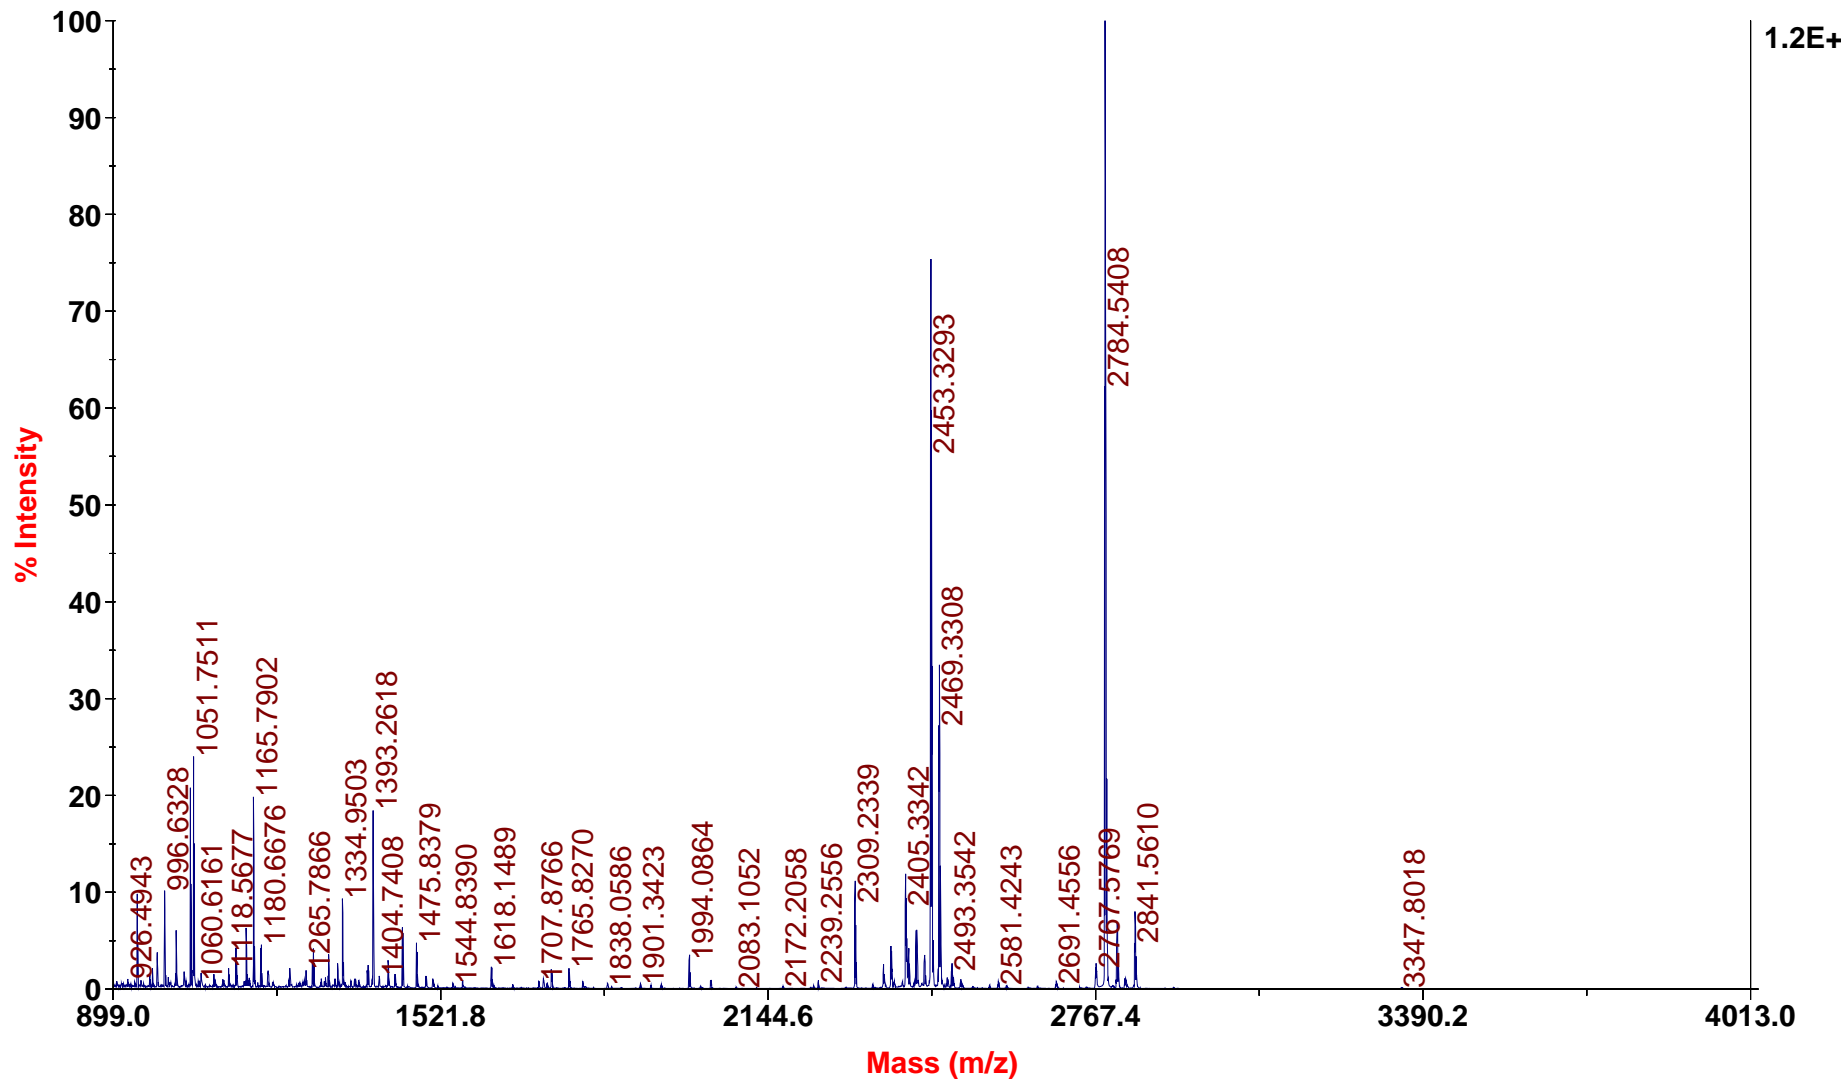



# M25

4700 MS/MS Precursor 1045.61 Spec #1 MC[BP = 860.9, 1151]

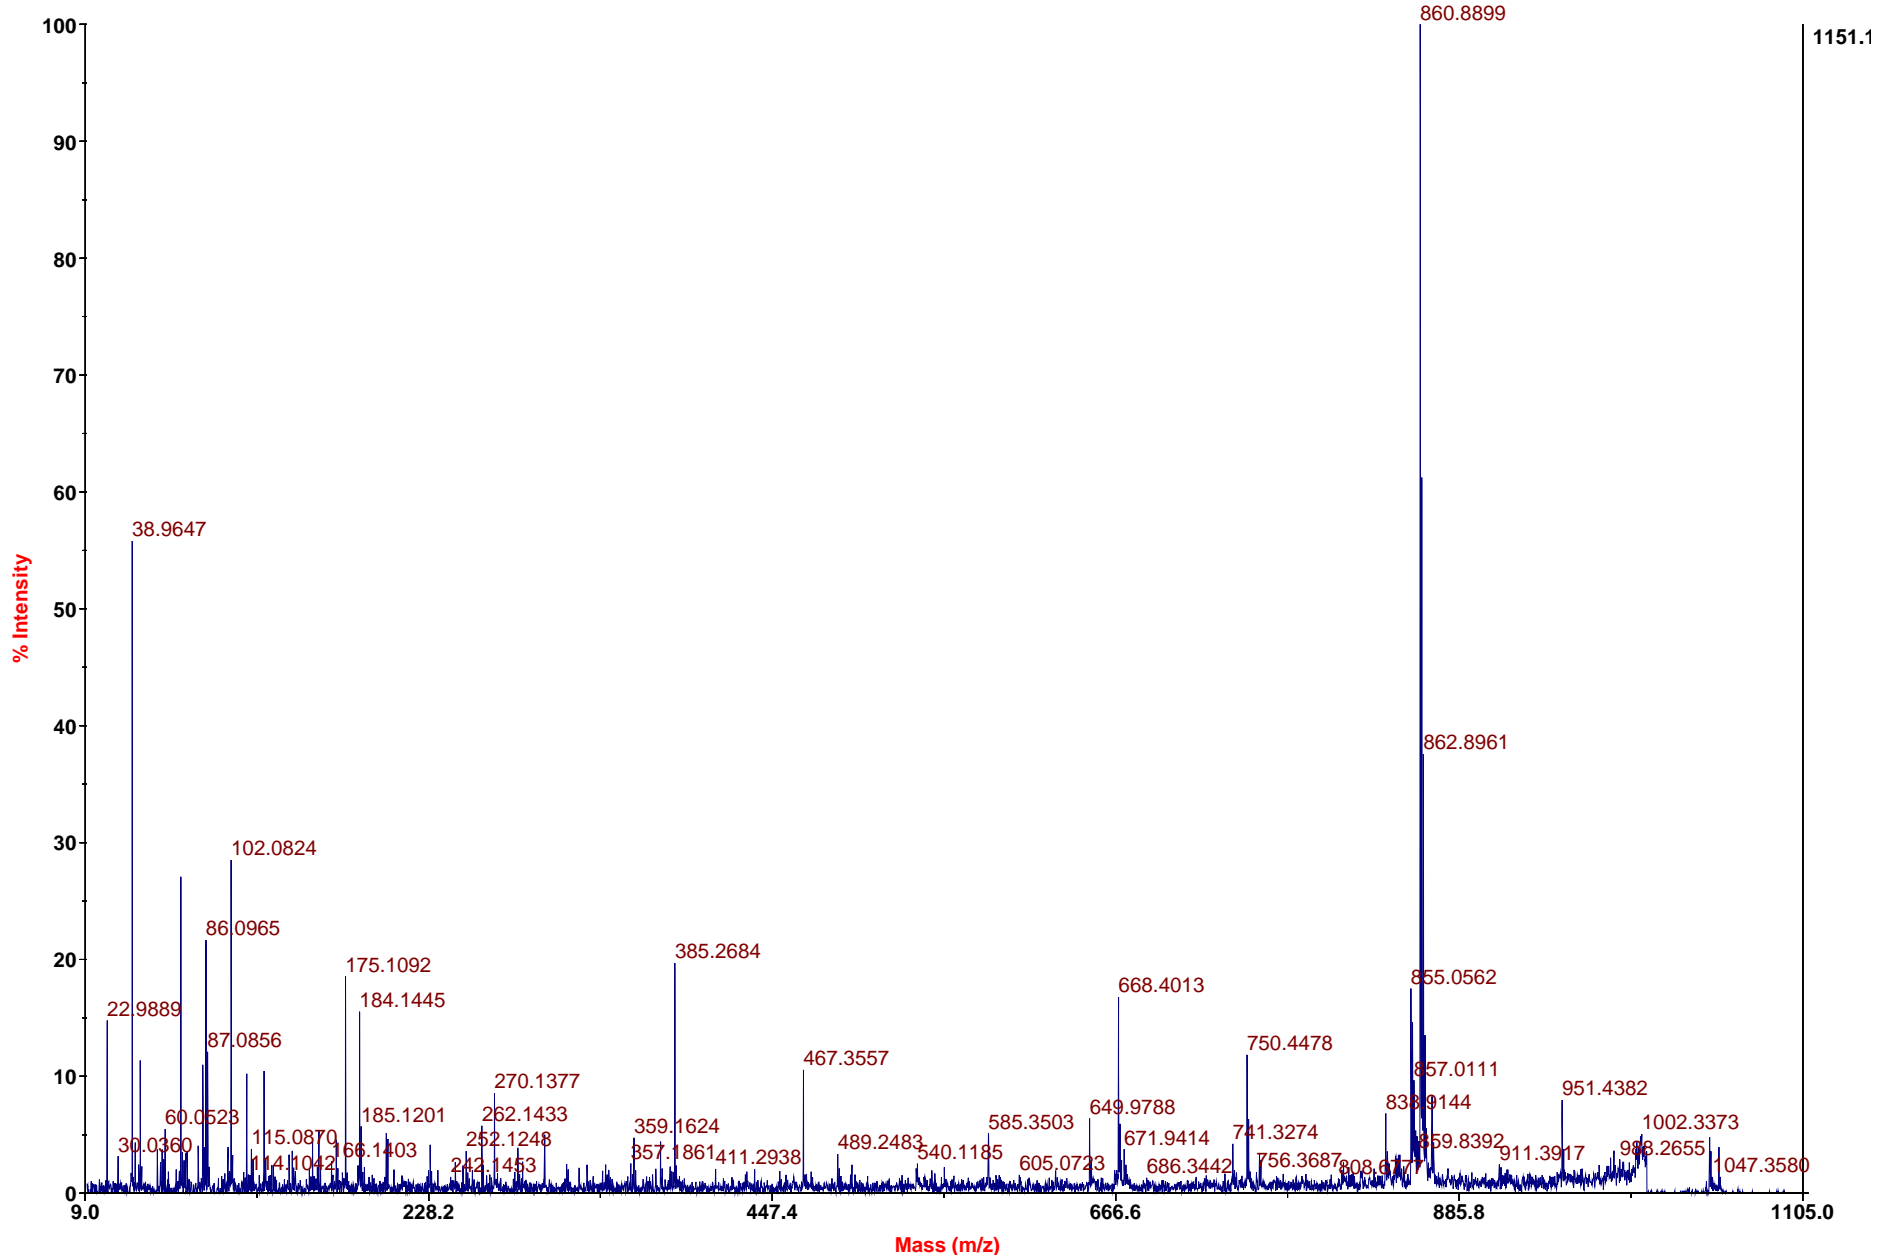

# M25

4700 MS/MS Precursor 996.633 Spec #1 MC[BP = 216.1, 1537]

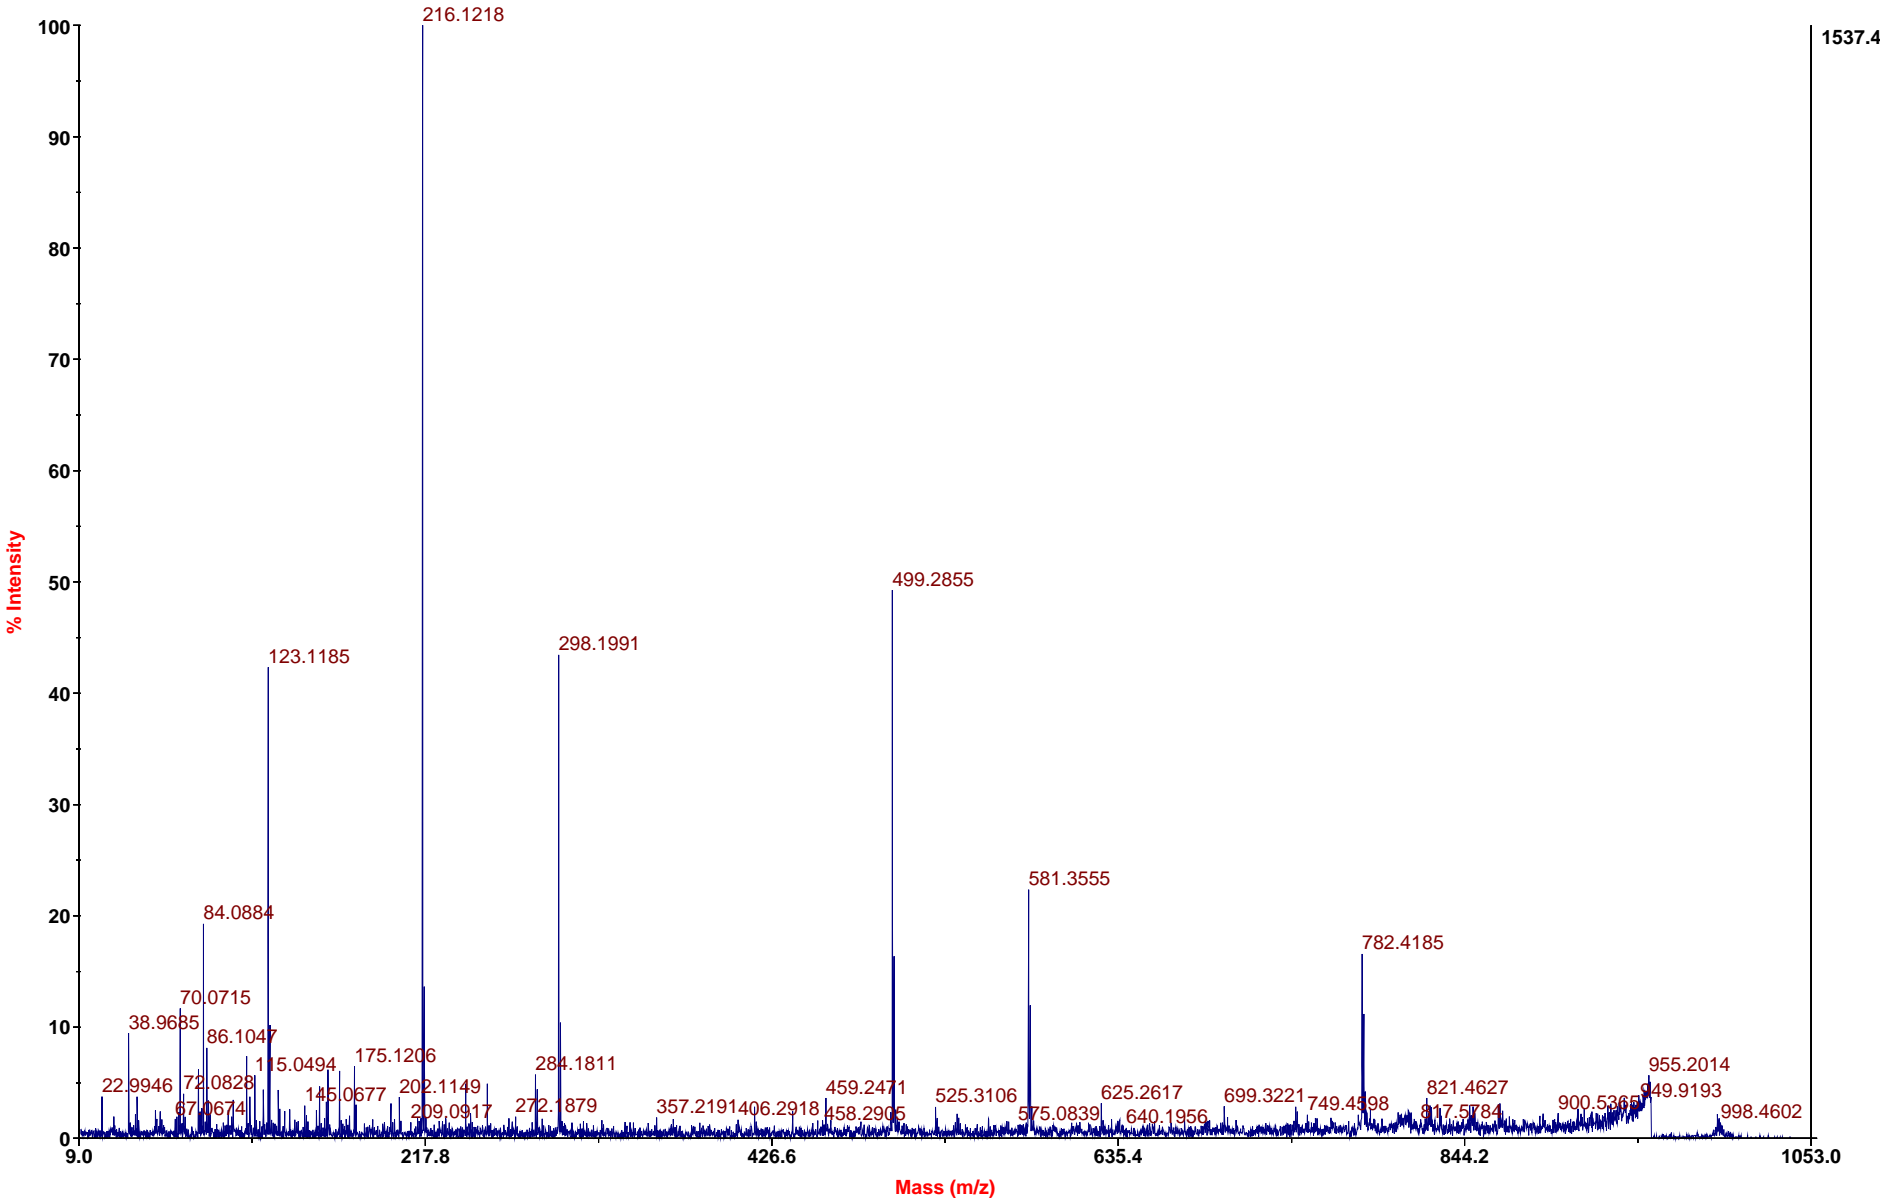

Sample M26

4700 Reflector Spec #1 MC=>NR(2.00)[BP = 1298.8, 57153]

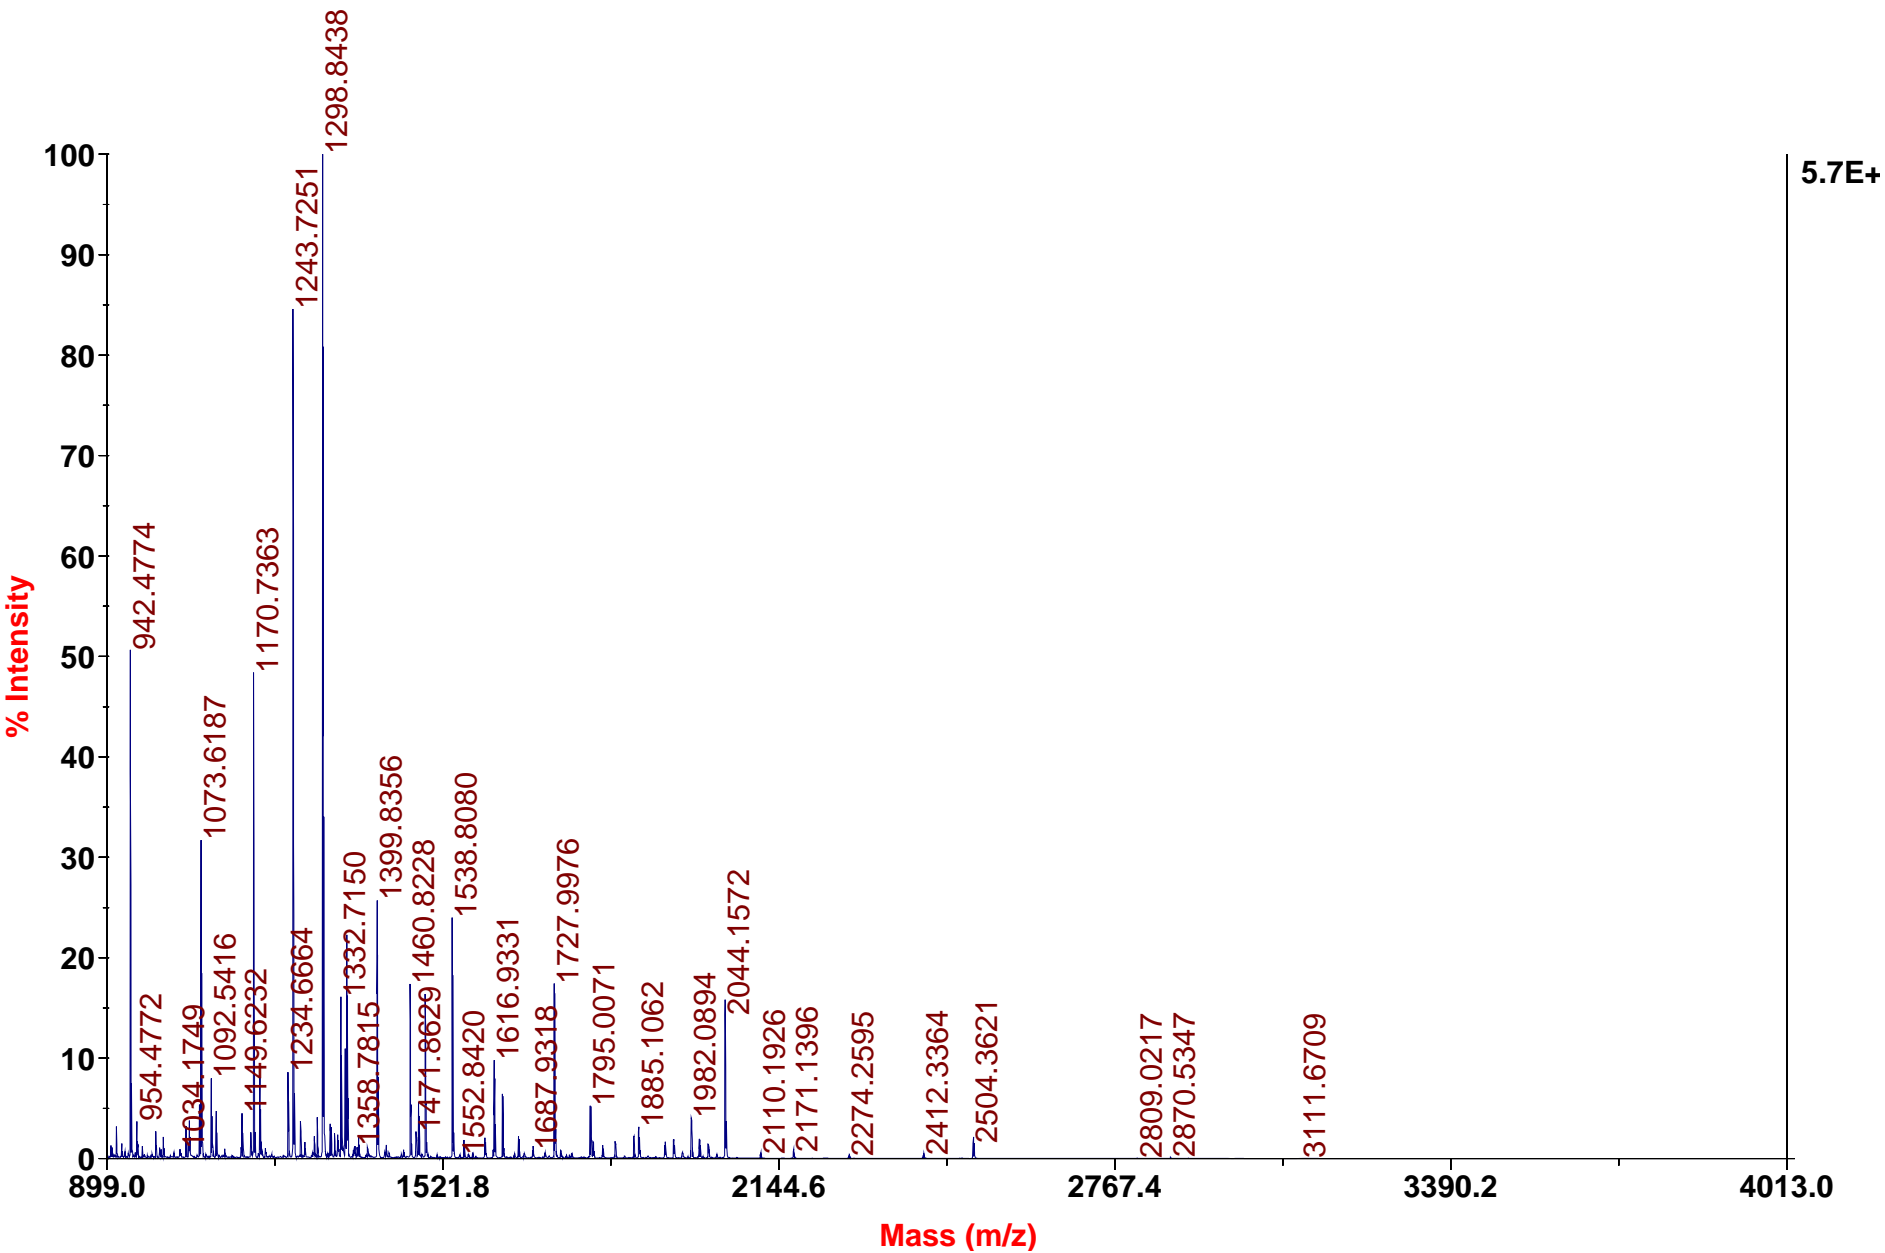

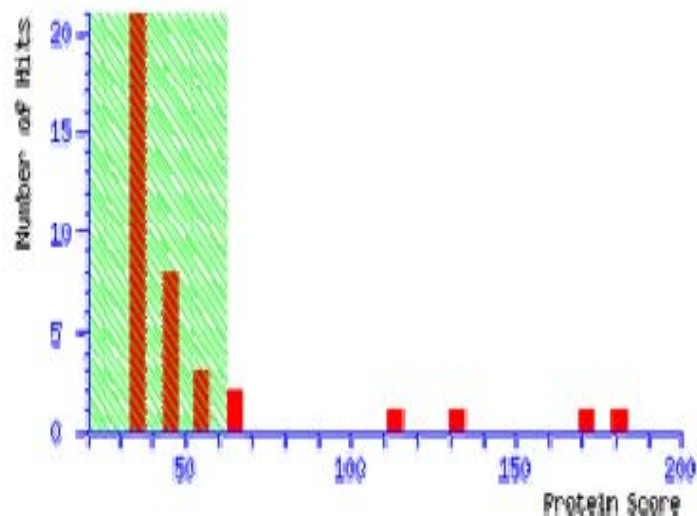

## Concise Protein Summary Report

Format As

Concise Protein Summary

[Help](#)

Significance threshold  $p <$

Max. number of hits

1. **Mixture 1** Total score: **181** Expect:  $7.3e-14$  Matches: 45

Components (only one family member shown for each component):

[Q9D1R6](#) MOUSE Mass: 32804 Score: **167** Expect:  $1.8e-12$  Matches: 35

18-day embryo whole body cDNA, RIKEN full-length enriched library, clone:1100001K11 product:tropomyosin 2, beta, full insert sequ

[Q9CY74](#) MOUSE Mass: 17645 Score: **53** Expect: 0.43 Matches: 11

8 days embryo whole body cDNA, RIKEN full-length enriched library, clone:5730592G18 product:RIKEN cDNA 5730592G18.- Mus musculus

# Protein View

Match to: **Q9D1R6\_MOUSE** score: **167** Expect: **1.8e-12**  
**18-day embryo whole body cDNA, RIKEN full-length enriched library, clone:1100001K11 product:tropomyosin 2, beta, full**  
Found in search of pmf\_J6\_129990866209.txt

Nominal mass ( $M_r$ ): **32804**; Calculated pI value: **4.64**  
NCBI BLAST search of [Q9D1R6\\_MOUSE](#) against nr  
Unformatted [sequence string](#) for pasting into other applications

Taxonomy: [Mus musculus](#)  
Links to retrieve other entries containing this sequence from NCBI Entrez:  
(no taxonomy information for this entry)

Variable modifications: Carbamidomethyl (C), Deamidated (NQ), Oxidation (M)  
Cleavage by Trypsin: cuts C-term side of KR unless next residue is P  
Number of mass values searched: **129**  
Number of mass values matched: **35**  
Sequence Coverage: **70%**

Matched peptides shown in **Bold Red**

```
1 MDAIKKKMQM LKLDKENAID RADEAEADKK QAEDRCKQLE EEQQALQKKL
51 KGTEDEVEKY SESVKDAQEK LEQAEKKATD AEADVASLNR RIQLVEEELD
101 RAQERLATAL QKLEEAEKAA DESERGMKVI ENRAMKDEEK MELQEMQLKE
151 AKHIAEDSDR KYEEVARKLV ILEGELERSE ERAEVAESKG GDLEEELKIV
201 TNNLKSLEAQ ADKYSTKEDK YEEEIKLLEE KLKEAETRAE FAERSVAKLE
251 KTIDDLEDEV YAQKMKYKAI SEELDNALND ITSL
```

Show predicted peptides also

Sort Peptides By

Residue Number  Increasing Mass  Decreasing Mass

| Start | End | Observed  | Mr(expt)  | Mr(calc)  | ppm | Miss | Sequence                                          |
|-------|-----|-----------|-----------|-----------|-----|------|---------------------------------------------------|
| 13    | 21  | 1073.6161 | 1072.6088 | 1072.5513 | 54  | 1    | K.LDKENAIDR.A                                     |
| 31    | 37  | 906.4929  | 905.4856  | 905.4025  | 92  | 1    | K.QAEDRCK.Q Carbamidomethyl (C)                   |
| 36    | 48  | 1576.7727 | 1575.7654 | 1575.7450 | 13  | 1    | R.CKQLEEEQQALQK.K 2 Deamidated (NQ)               |
| 36    | 48  | 1631.8989 | 1630.8916 | 1630.7984 | 57  | 1    | R.CKQLEEEQQALQK.K Carbamidomethyl (C)             |
| 38    | 48  | 1343.7493 | 1342.7420 | 1342.6728 | 52  | 0    | K.QLEEEQQALQK.K                                   |
| 38    | 49  | 1471.8601 | 1470.8528 | 1470.7678 | 58  | 1    | K.QLEEEQQALQK.L                                   |
| 38    | 49  | 1475.8446 | 1474.8373 | 1474.7038 | 91  | 1    | K.QLEEEQQALQK.L 4 Deamidated (NQ)                 |
| 50    | 59  | 1147.6428 | 1146.6355 | 1146.5768 | 51  | 1    | K.LKGTEDEVEK.Y                                    |
| 52    | 65  | 1599.8319 | 1598.8246 | 1598.7311 | 58  | 1    | K.GTEDEVEKYSESVK.D                                |
| 60    | 70  | 1283.6857 | 1282.6784 | 1282.6041 | 58  | 1    | K.YSESVKDAQEK.L                                   |
| 66    | 76  | 1288.7073 | 1287.7000 | 1287.6306 | 54  | 1    | K.DAQEKLEQAEK.K                                   |
| 77    | 90  | 1460.8223 | 1459.8150 | 1459.7267 | 61  | 1    | K.KATDAEADVASLNR.R                                |
| 78    | 90  | 1332.7152 | 1331.7079 | 1331.6317 | 57  | 0    | K.ATDAEADVASLNR.R                                 |
| 78    | 91  | 1488.8296 | 1487.8223 | 1487.7328 | 60  | 1    | K.ATDAEADVASLNR.R.I                               |
| 91    | 101 | 1399.8350 | 1398.8277 | 1398.7467 | 58  | 1    | R.RIQLVEEELDR.A                                   |
| 92    | 101 | 1243.7239 | 1242.7166 | 1242.6456 | 57  | 0    | R.IQLVEEELDR.A                                    |
| 92    | 105 | 1727.9966 | 1726.9893 | 1726.8849 | 60  | 1    | R.IQLVEEELDRAQER.L                                |
| 113   | 125 | 1476.7725 | 1475.7652 | 1475.6739 | 62  | 1    | K.LEEAEKAADESER.G                                 |
| 141   | 149 | 1149.6221 | 1148.6148 | 1148.5569 | 50  | 0    | K.MELQEMQLK.E                                     |
| 141   | 149 | 1165.6195 | 1164.6122 | 1164.5518 | 52  | 0    | K.MELQEMQLK.E Oxidation (M)                       |
| 141   | 152 | 1510.8165 | 1509.8092 | 1509.7054 | 69  | 1    | K.MELQEMQLKEAK.H Deamidated (NQ); 2 Oxidation (M) |
| 153   | 160 | 942.4771  | 941.4698  | 941.4203  | 53  | 0    | K.HIAEDSDR.K                                      |
| 153   | 161 | 1070.5800 | 1069.5727 | 1069.5152 | 54  | 1    | K.HIAEDSDRK.Y                                     |
| 168   | 178 | 1298.8428 | 1297.8355 | 1297.7605 | 58  | 1    | R.KLVILEGELER.S                                   |
| 169   | 178 | 1170.7357 | 1169.7284 | 1169.6656 | 54  | 0    | K.LVILEGELER.S                                    |
| 169   | 182 | 1671.9833 | 1670.9760 | 1670.8839 | 55  | 1    | K.LVILEGELERSEER.A                                |
| 179   | 189 | 1234.6641 | 1233.6568 | 1233.5837 | 59  | 1    | R.SEERAEVAESK.C                                   |
| 183   | 198 | 1749.9827 | 1748.9754 | 1748.8138 | 92  | 1    | R.AEVAESKCGDLEEELK.I                              |
| 190   | 198 | 1092.5413 | 1091.5340 | 1091.4805 | 49  | 0    | K.CGDLEEELK.I Carbamidomethyl (C)                 |
| 190   | 205 | 1817.9924 | 1816.9851 | 1816.9240 | 34  | 1    | K.CGDLEEELKIVTNNLK.S                              |
| 190   | 205 | 1875.0626 | 1874.0553 | 1873.9455 | 59  | 1    | K.CGDLEEELKIVTNNLK.S Carbamidomethyl (C)          |
| 206   | 217 | 1340.7412 | 1339.7339 | 1339.6619 | 54  | 1    | K.SLEAQADKYSTK.E                                  |
| 218   | 226 | 1182.6132 | 1181.6059 | 1181.5452 | 51  | 1    | K.EDKYEELK.L                                      |
| 234   | 244 | 1308.7366 | 1307.7293 | 1307.6106 | 91  | 1    | K.EAETRAEFAER.S                                   |
| 252   | 264 | 1538.8053 | 1537.7980 | 1537.7148 | 54  | 0    | K.TIDDLEDEVYAQK.M                                 |

4700 MS/MS Precursor 1243.72 Spec #1 MC[BP = 175.1, 6847]

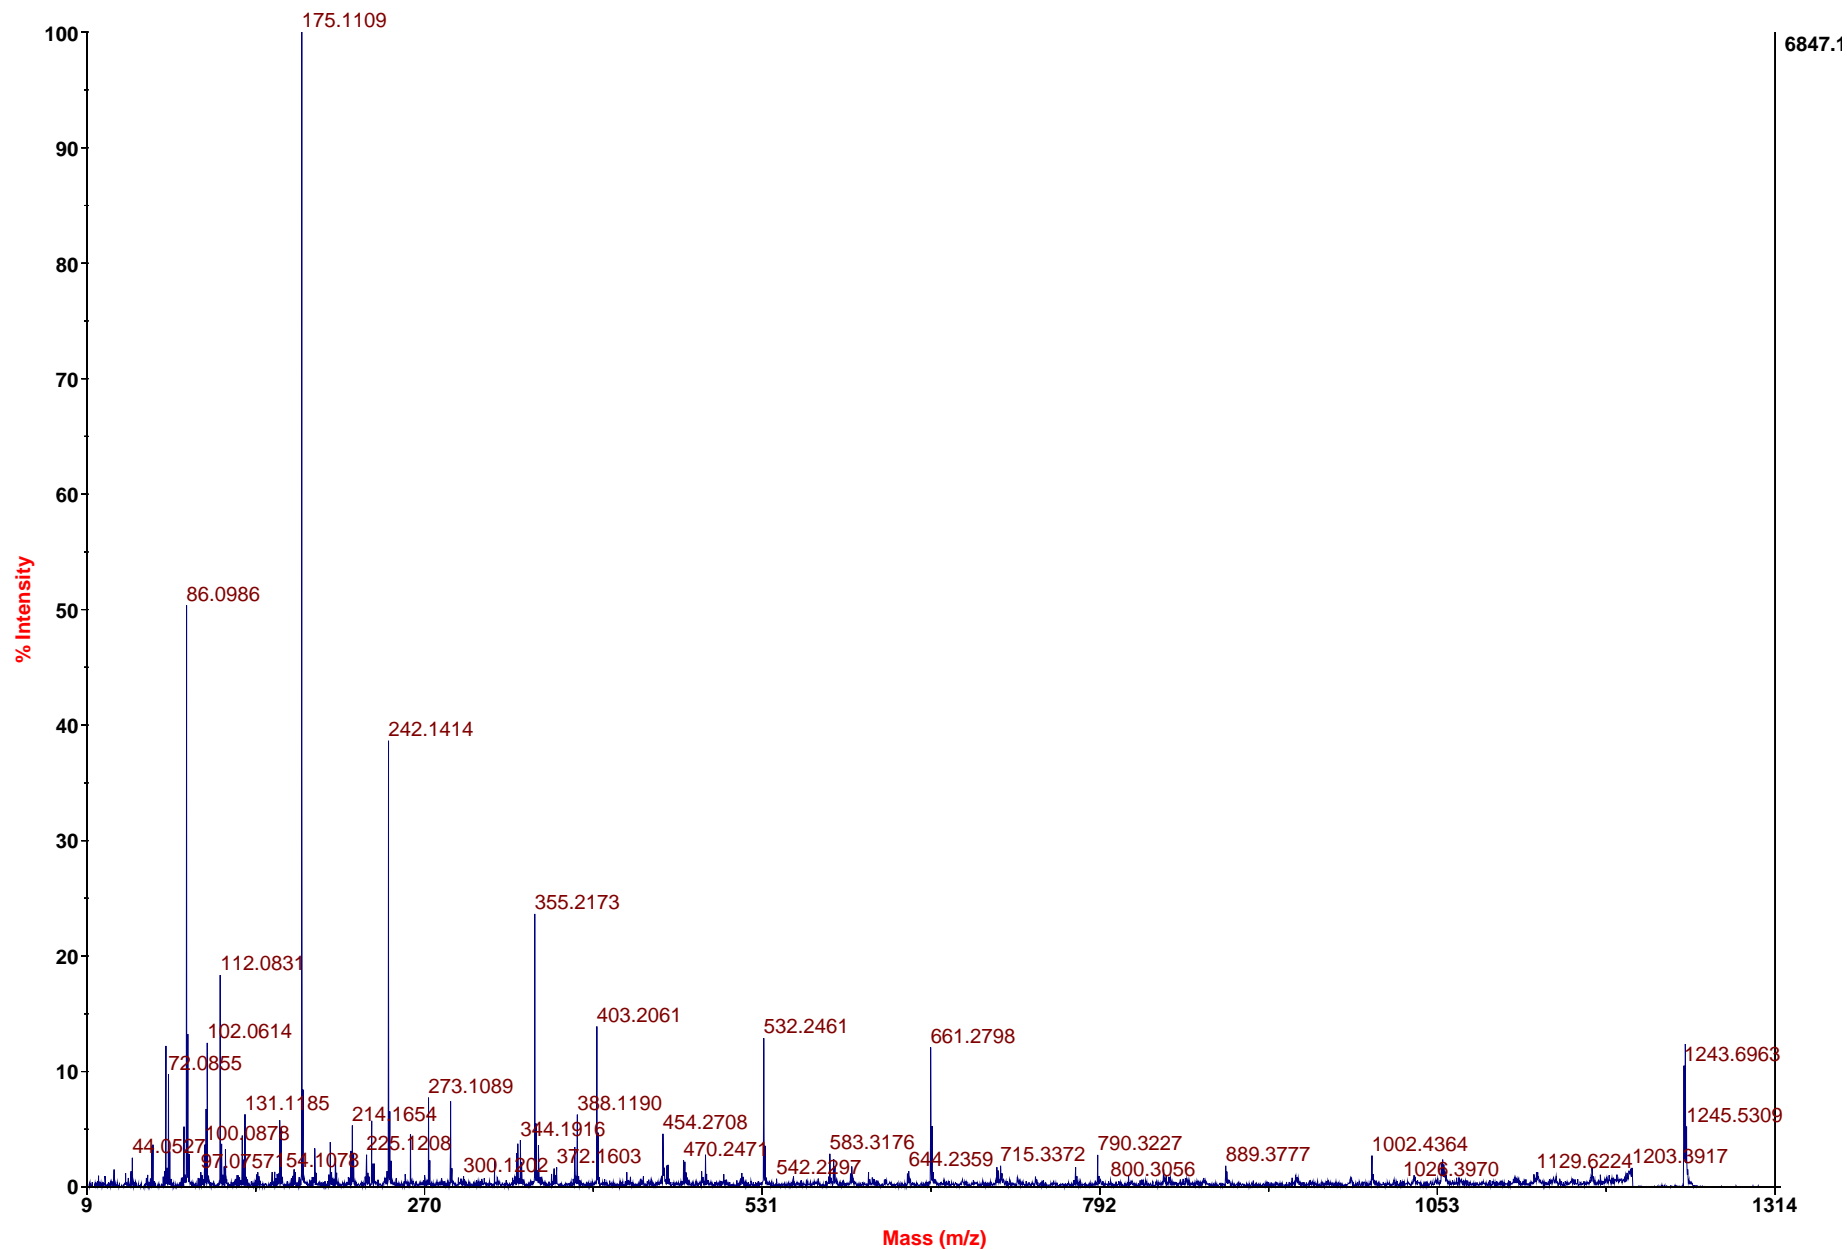

4700 MS/MS Precursor 1170.74 Spec #1 MC[BP = 86.1, 5248]

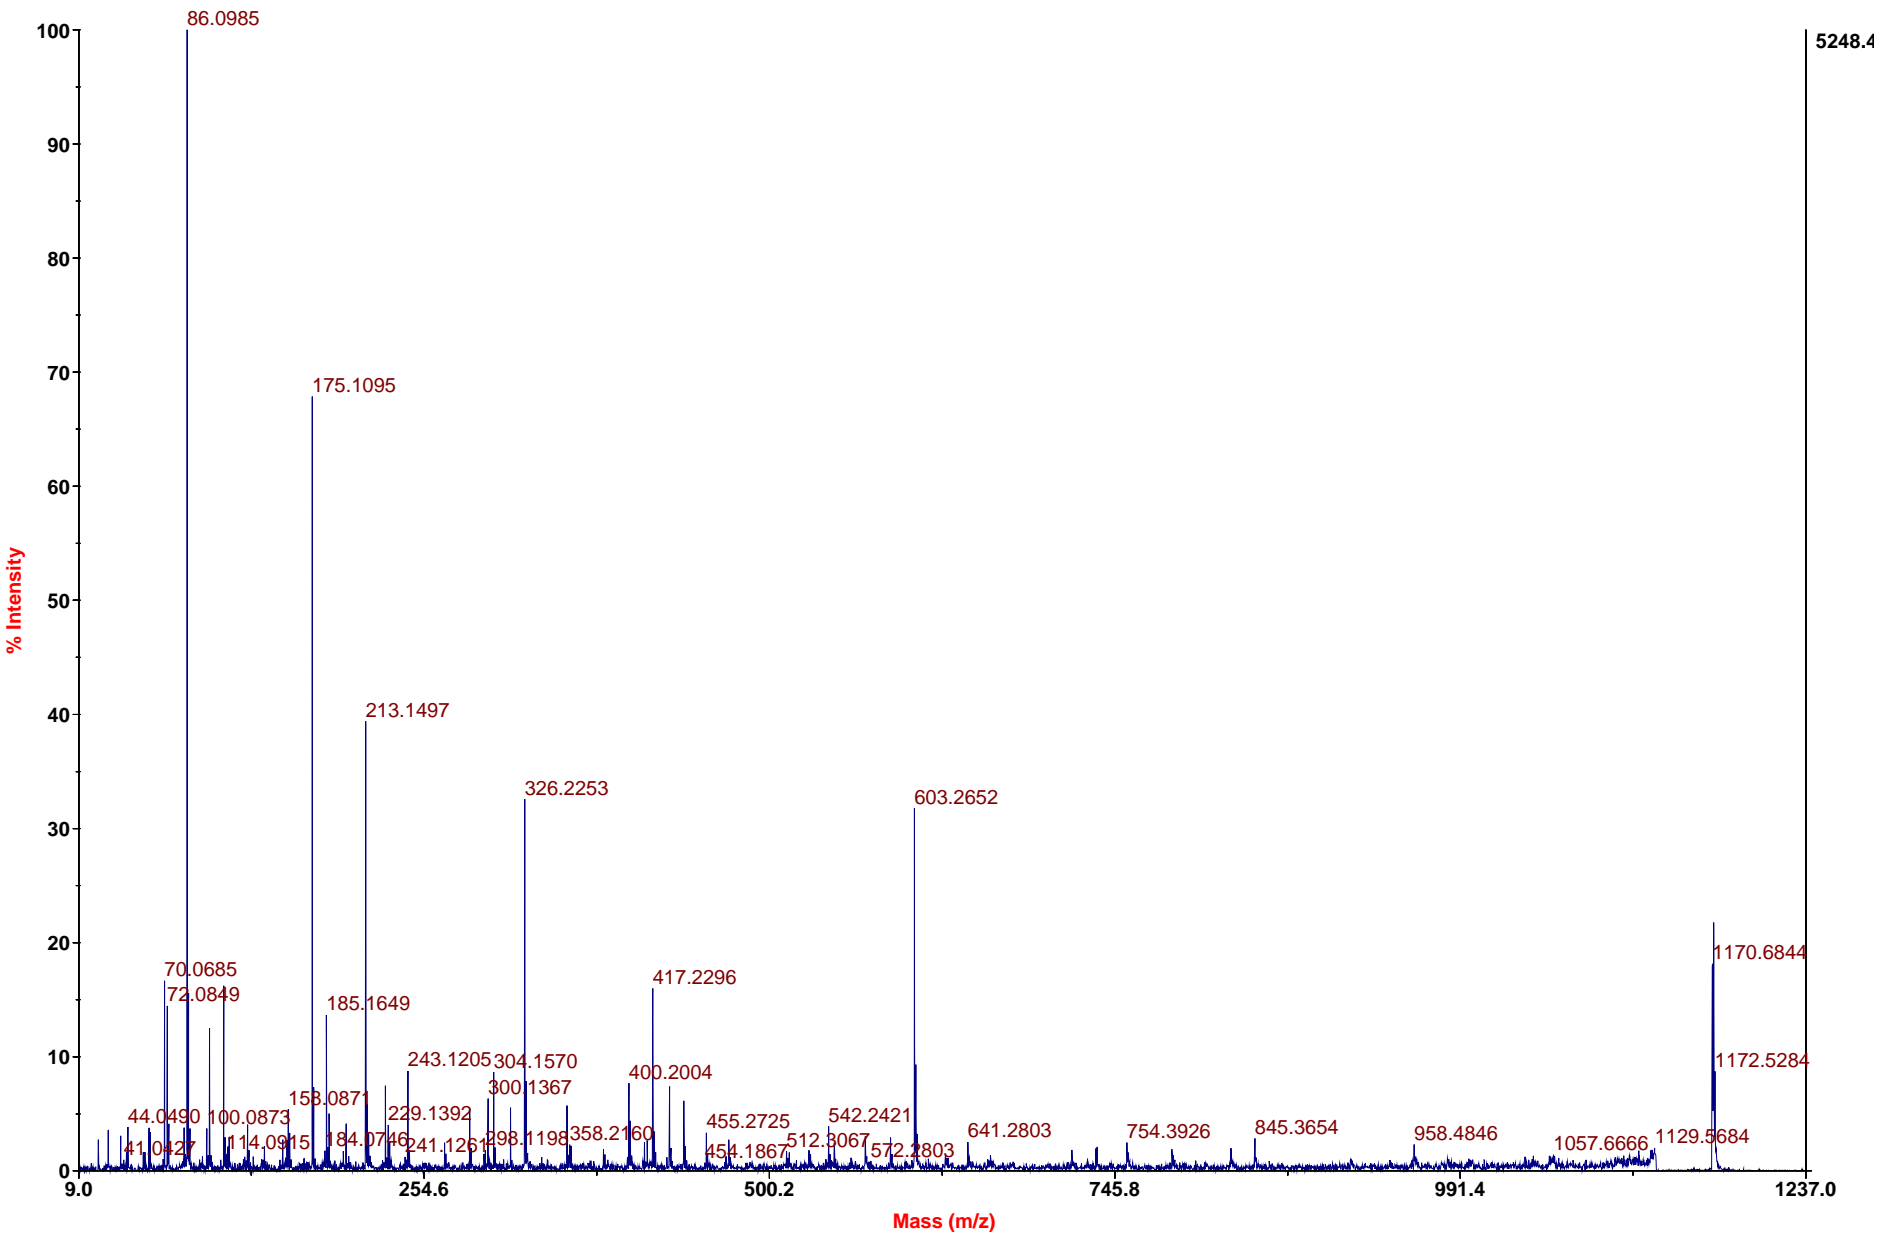

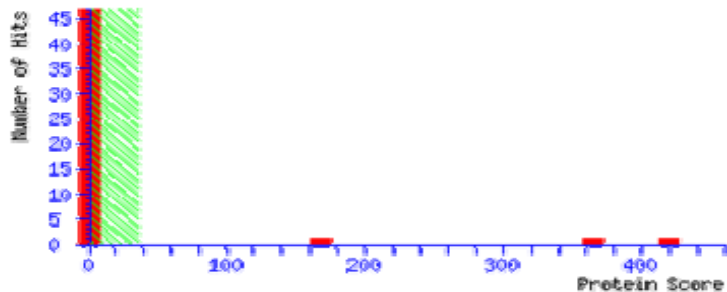

## Peptide Summary Report

Format As

[Help](#)

Significance threshold  $p <$   Max. number of hits

Standard scoring  MudPIT scoring  Ions score or expect cut-off  Show sub-sets

Show pop-ups  Suppress pop-ups  Sort unassigned  Require bold red

Error tolerant

1. [TMRBB](#) Mass: 32817 Score: 420 Matches: 15(12) Sequences: 15(12) emPAI: 8.90  
tropomyosin beta chain, skeletal muscle [validated] - rabbit (tentative sequence)

Check to include this hit in error tolerant search

| Query                                                  | Observed  | Mr (expt) | Mr (calc) | ppm  | Miss | Score | Expect  | Rank | Unique | Peptide                                |
|--------------------------------------------------------|-----------|-----------|-----------|------|------|-------|---------|------|--------|----------------------------------------|
| <input checked="" type="checkbox"/> <a href="#">1</a>  | 942.4771  | 941.4698  | 941.4203  | 52.7 | 0    | 46    | 0.0052  | 1    |        | K.HIAEDSDR.K                           |
| <input checked="" type="checkbox"/> <a href="#">2</a>  | 1073.6161 | 1072.6088 | 1072.5513 | 53.7 | 1    | 37    | 0.048   | 1    |        | K.LDKENAIDR.A                          |
| <input checked="" type="checkbox"/> <a href="#">3</a>  | 1092.5413 | 1091.5340 | 1091.4805 | 49.1 | 0    | 55    | 0.001   | 1    | U      | K.CGDLEELK.I + Carbamidomethyl (C)     |
| <input checked="" type="checkbox"/> <a href="#">5</a>  | 1170.7357 | 1169.7284 | 1169.6656 | 53.7 | 0    | 76    | 2.3e-06 | 1    |        | K.LVILEGELER.S                         |
| <input checked="" type="checkbox"/> <a href="#">6</a>  | 1182.6132 | 1181.6059 | 1181.5452 | 51.4 | 1    | 35    | 0.091   | 1    |        | K.EDKYEEEIK.L                          |
| <input checked="" type="checkbox"/> <a href="#">7</a>  | 1243.7239 | 1242.7166 | 1242.6456 | 57.2 | 0    | 65    | 7e-05   | 1    |        | R.IQLVEEELDR.A                         |
| <input checked="" type="checkbox"/> <a href="#">8</a>  | 1298.8428 | 1297.8355 | 1297.7605 | 57.8 | 1    | 82    | 3.1e-07 | 1    |        | R.KLVILEGELER.S                        |
| <input checked="" type="checkbox"/> <a href="#">9</a>  | 1343.7493 | 1342.7420 | 1342.6728 | 51.5 | 0    | 57    | 0.0005  | 1    |        | K.QLEEEQALQK.K                         |
| <input checked="" type="checkbox"/> <a href="#">10</a> | 1399.8350 | 1398.8277 | 1398.7467 | 58.0 | 1    | 16    |         | 4    | 1      | R.RIQLVEEELDR.A                        |
| <input checked="" type="checkbox"/> <a href="#">11</a> | 1460.8223 | 1459.8150 | 1459.7267 | 60.5 | 1    | 72    | 1.6e-05 | 1    |        | K.KATDAEADVASLNR.R                     |
| <input checked="" type="checkbox"/> <a href="#">12</a> | 1476.7725 | 1475.7652 | 1475.6739 | 61.9 | 1    | 74    | 1.4e-05 | 1    |        | K.LEEAekaadeser.G                      |
| <input checked="" type="checkbox"/> <a href="#">13</a> | 1488.8296 | 1487.8223 | 1487.7328 | 60.2 | 1    | 33    | 0.14    | 1    |        | K.ATDAEADVASLNR.R                      |
| <input checked="" type="checkbox"/> <a href="#">14</a> | 1538.8053 | 1537.7980 | 1537.7148 | 54.1 | 0    | 85    | 1e-06   | 1    | U      | K.TIDDLEDEVYAQK.M                      |
| <input checked="" type="checkbox"/> <a href="#">16</a> | 1631.8989 | 1630.8916 | 1630.7984 | 57.1 | 1    | 85    | 8.1e-07 | 1    |        | R.CKQLEEEQALQK.K + Carbamidomethyl (C) |
| <input checked="" type="checkbox"/> <a href="#">17</a> | 1727.9966 | 1726.9893 | 1726.8849 | 60.5 | 1    | 51    | 0.0017  | 1    |        | R.IQLVEEELDRAQER.L                     |



## Protein View

Match to: **TMRBB** Score: **420**

**tropomyosin beta chain, skeletal muscle [validated] - rabbit (tentative sequence)**

Found in search of ppw\_J6\_129990872509.txt

Nominal mass ( $M_r$ ): **32817**; Calculated pI value: **4.66**

NCBI BLAST search of [TMRBB](#) against nr

Unformatted [sequence string](#) for pasting into other applications

Taxonomy: [Oryctolagus cuniculus](#)

Links to retrieve other entries containing this sequence from NCBI Entrez:

(no taxonomy information for this entry)  
(no taxonomy information for this entry)

Variable modifications: Carbamidomethyl (C), Deamidated (NQ), Oxidation (M)

Cleavage by Trypsin: cuts C-term side of KR unless next residue is P

Sequence Coverage: **40%**

Matched peptides shown in **Bold Red**

```
1  MDAIKKKMQM LKLDKENAID RAEQAEADKK QAEDRCKQLE EEQQALQKKL
51 KGTEDVEVEKY SESVKDAQEK LEQAEKKATD AEADVASLNR RIQLVEEELD
101 RAQERLATAL QKLEEAEAKA DESERGMKVI ENRAMKDEEK MELQEMQLKE
151 AKHIAEDSDR KYEEVARKLV ILEGELERSE ERAEVAESKC GDLEELEIKIV
201 TNNLKSLEAQ ADKYSTEDK YEEEIKLLEE KLKEAETRAE FAERSVAKLE
251 KTIDDLEDEV YAQKMKYKAI SEELDNALND ITSL
```

Show predicted peptides also

Sort Peptides By

Residue Number  Increasing Mass  Decreasing Mass

| Start - End | Observed  | Mr (expt) | Mr (calc) | ppm | Miss | Sequence                                                                |
|-------------|-----------|-----------|-----------|-----|------|-------------------------------------------------------------------------|
| 13 - 21     | 1073.6161 | 1072.6088 | 1072.5513 | 54  | 1    | K.LDKENAIDR.A ( <a href="#">Ions score 37</a> )                         |
| 36 - 48     | 1631.8989 | 1630.8916 | 1630.7984 | 57  | 1    | R.CKQLEEEQQALQK.K Carbamidomethyl (C) ( <a href="#">Ions score 85</a> ) |
| 38 - 48     | 1343.7493 | 1342.7420 | 1342.6728 | 52  | 0    | K.QLEEEQQALQK.K ( <a href="#">Ions score 57</a> )                       |
| 77 - 90     | 1460.8223 | 1459.8150 | 1459.7267 | 61  | 1    | K.KATDAEADVASLNR.R ( <a href="#">Ions score 72</a> )                    |
| 78 - 91     | 1488.8296 | 1487.8223 | 1487.7328 | 60  | 1    | K.ATDAEADVASLNR.R.I ( <a href="#">Ions score 33</a> )                   |
| 91 - 101    | 1399.8350 | 1398.8277 | 1398.7467 | 58  | 1    | R.RIQLVEEELDR.A ( <a href="#">Ions score 16</a> )                       |
| 92 - 101    | 1243.7239 | 1242.7166 | 1242.6456 | 57  | 0    | R.IQLVEEELDR.A ( <a href="#">Ions score 65</a> )                        |
| 92 - 105    | 1727.9966 | 1726.9893 | 1726.8849 | 60  | 1    | R.IQLVEEELDRAQER.L ( <a href="#">Ions score 51</a> )                    |
| 113 - 125   | 1476.7725 | 1475.7652 | 1475.6739 | 62  | 1    | K.LEEA <b>EKA</b> DESER.G ( <a href="#">Ions score 74</a> )             |
| 153 - 160   | 942.4771  | 941.4698  | 941.4203  | 53  | 0    | K.HIAEDSDR.K ( <a href="#">Ions score 46</a> )                          |
| 168 - 178   | 1298.8428 | 1297.8355 | 1297.7605 | 58  | 1    | R.KLVILEGELER.S ( <a href="#">Ions score 82</a> )                       |
| 169 - 178   | 1170.7357 | 1169.7284 | 1169.6656 | 54  | 0    | K.LVILEGELER.S ( <a href="#">Ions score 76</a> )                        |
| 190 - 198   | 1092.5413 | 1091.5340 | 1091.4805 | 49  | 0    | K.CGDLEELK.I Carbamidomethyl (C) ( <a href="#">Ions score 55</a> )      |
| 218 - 226   | 1182.6132 | 1181.6059 | 1181.5452 | 51  | 1    | K.EDKYEE <b>EIK</b> .L ( <a href="#">Ions score 35</a> )                |
| 252 - 264   | 1538.8053 | 1537.7980 | 1537.7148 | 54  | 0    | K.TIDDLEDEVYAQK.M ( <a href="#">Ions score 85</a> )                     |

Sample M27

4700 Reflector Spec #1 MC=>NR(2.00)[BP = 1243.7, 68319]

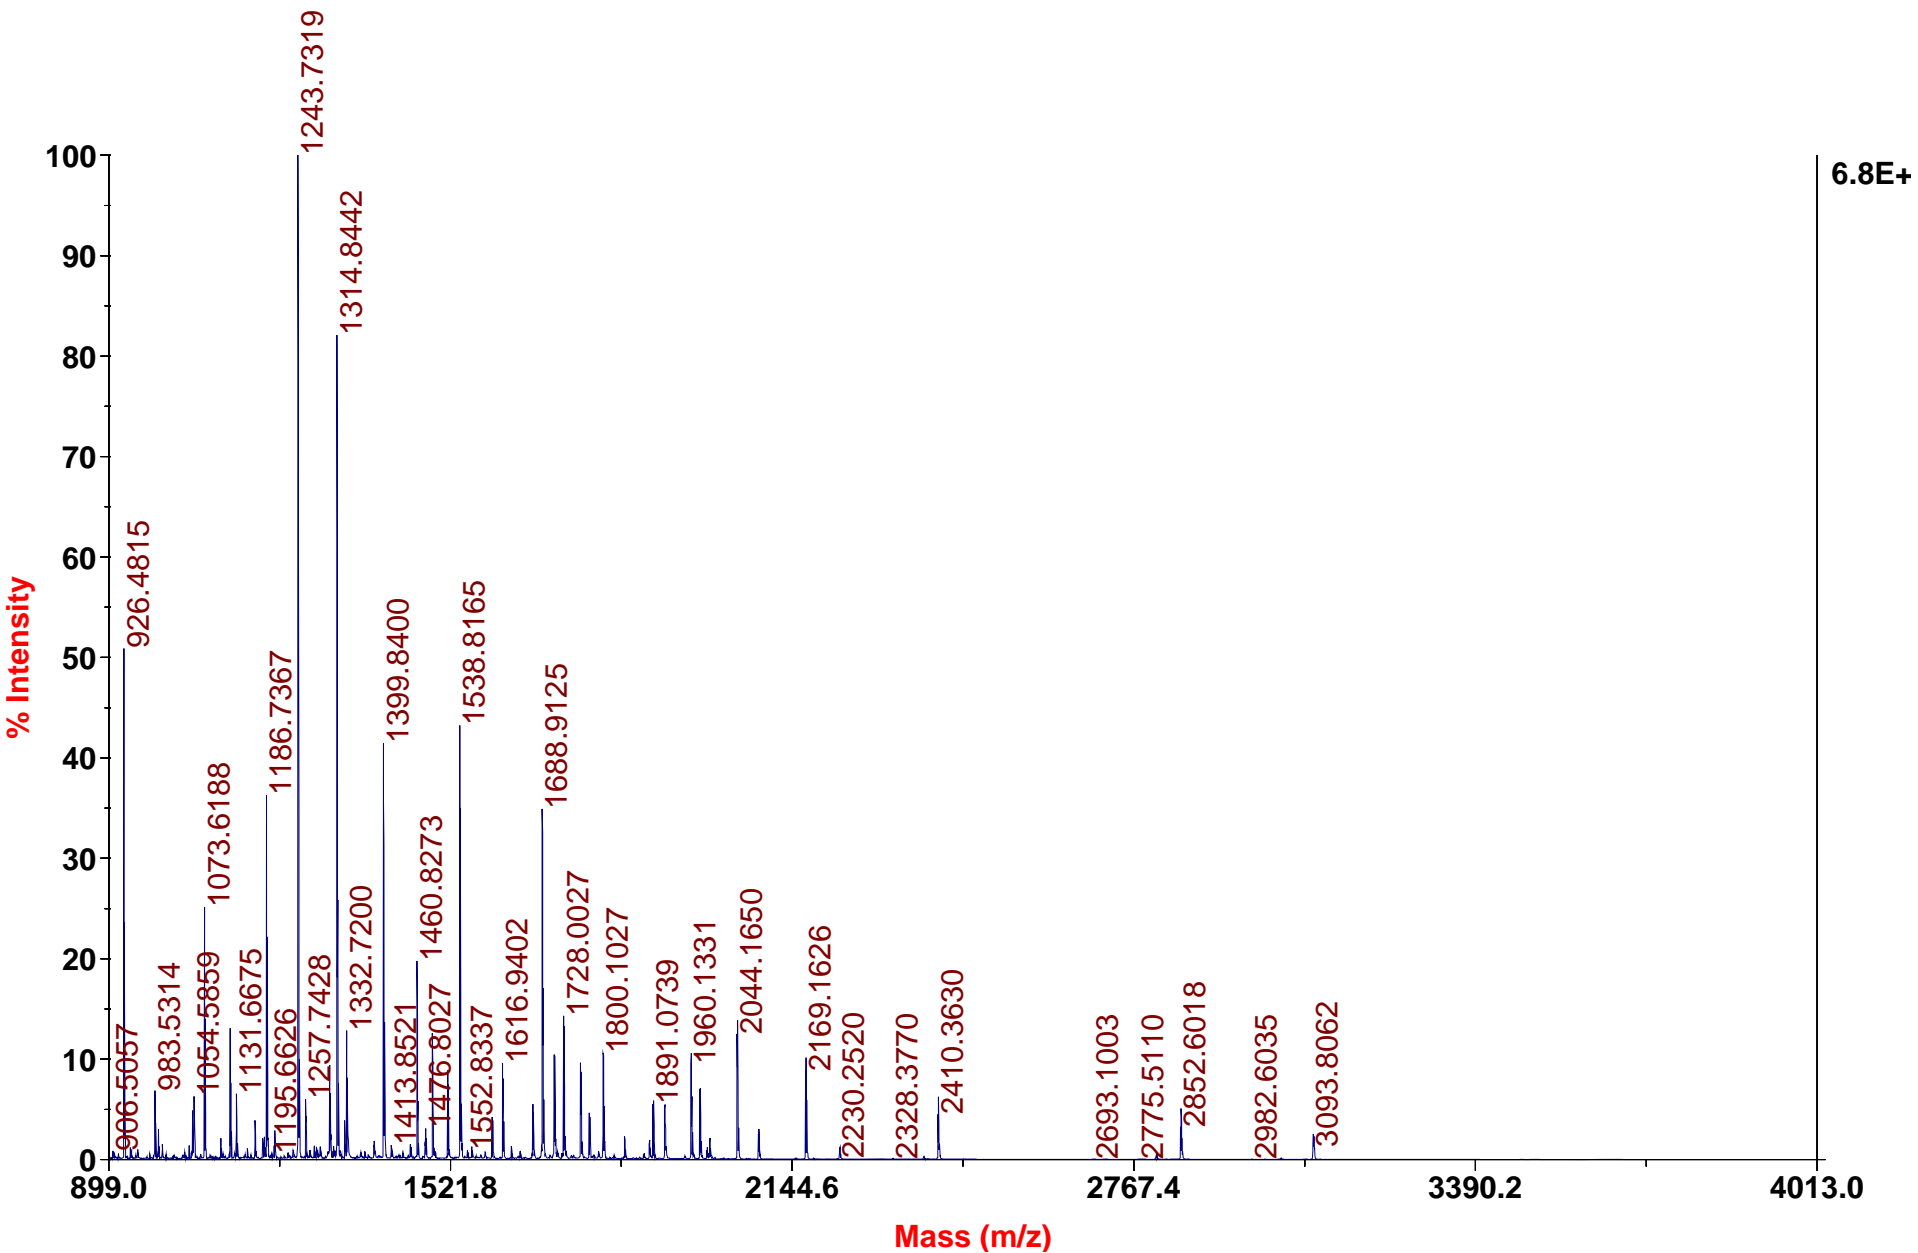

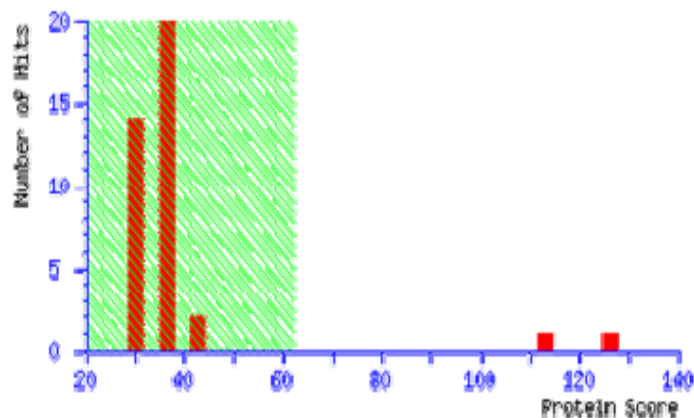

## Concise Protein Summary Report

Format As  [Help](#)

Significance threshold  $p <$   Max. number of hits

- [TMRBA](#) **Mass:** 32661 **Score:** 126 **Expect:** 2.3e-08 **Matches:** 31  
 tropomyosin alpha chain, cardiac and skeletal muscle [validated] - rabbit

[Q8BSH3 MOUSE](#) **Mass:** 32679 **Score:** 111 **Expect:** 7.3e-07 **Matches:** 29  
 12 days embryo male wolffian duct includes surrounding region cDNA, RIKEN full-length enriched library, clone:6720477I24

[A39816](#) **Mass:** 32689 **Score:** 94 **Expect:** 3.8e-05 **Matches:** 28  
 tropomyosin 2, fibroblast - rat

[Q99PB8 MOUSE](#) **Mass:** 1525 **Score:** 33 **Expect:** 48 **Matches:** 3  
 Adenosine kinase (EC 2.7.1.20) (Fragment).- Mus musculus (Mouse).
-

## Protein View

Match to: **TMRBA** score: **126** Expect: **2.3e-08**  
**tropomyosin alpha chain, cardiac and skeletal muscle [validated] - rabbit**  
Found in search of pmf\_K6\_129990866210.txt

Nominal mass (M<sub>0</sub>): **32661**; Calculated pI value: **4.69**

NCBI BLAST search of **TMRBA** against nr  
Unformatted [sequence string](#) for pasting into other applications

Taxonomy: [Oryctolagus cuniculus](#)

Links to retrieve other entries containing this sequence from NCBI Entrez:

(no taxonomy information for this entry)  
(no taxonomy information for this entry)

Variable modifications: Carbamidomethyl (C), Deamidated (NQ), Oxidation (M)  
Cleavage by Trypsin: cuts C-term side of KR unless next residue is P  
Number of mass values searched: **142**  
Number of mass values matched: **31**  
Sequence Coverage: **69%**

Matched peptides shown in **Bold Red**

1 MDAIKKKMQM LK**LDKENALD RAEQAEADKK** AAEDRSKQLE DELVSLQKKL  
51 **KGTEDELDKY SEALKDAQEK LELAEEKATD** AEADVASLNR RIQLVEEELD  
101 **RAQERLATAL** QKLEEAEEKAA DESERGMKVI ESRAQKDEEK **MEIQEIQLKE**  
151 **AKHIAEDADR KYEEVARKLV IIESDLRAE** ERAELSEGKC **AELEELKTV**  
201 **TNNLKSLEAQ AEKYSQKEDK YEEEIKVLSL** KLKEAETRAE **FAERSVTKLE**  
251 **KSIDDLEDEL YAQKLRKYKAI SEELDHALND** MTSI

Show predicted peptides also

Sort Peptides By

Residue Number  Increasing Mass  Decreasing Mass

| Start | End | Observed  | Mr (expt) | Mr (calc) | ppm | Miss | Sequence                                        |
|-------|-----|-----------|-----------|-----------|-----|------|-------------------------------------------------|
| 13    | 21  | 1073.6185 | 1072.6112 | 1072.5513 | 56  | 1    | K.LDKENALDR.A                                   |
| 16    | 29  | 1560.8030 | 1559.7957 | 1559.7063 | 57  | 1    | K.ENALDRAEQAEADK.K Deamidated (NQ)              |
| 22    | 30  | 989.5439  | 988.5366  | 988.4825  | 55  | 1    | R.AEQAEADKK.A                                   |
| 36    | 48  | 1516.9116 | 1515.9043 | 1515.8144 | 59  | 1    | R.SKQLEDELVSLQK.K                               |
| 38    | 48  | 1301.7655 | 1300.7582 | 1300.6874 | 54  | 0    | K.QLEDELVSLQK.K                                 |
| 52    | 65  | 1597.8563 | 1596.8490 | 1596.7519 | 61  | 1    | K.GTEDELDKYSEALK.D                              |
| 66    | 76  | 1273.7345 | 1272.7272 | 1272.6561 | 56  | 1    | K.DAQEKLELAEK.K                                 |
| 78    | 90  | 1332.7179 | 1331.7106 | 1331.6317 | 59  | 0    | K.ATDAEADVASLNR.R                               |
| 78    | 91  | 1488.8333 | 1487.8260 | 1487.7328 | 63  | 1    | K.ATDAEADVASLNR.R.I                             |
| 91    | 101 | 1399.8395 | 1398.8322 | 1398.7467 | 61  | 1    | R.RIQLVEEELDR.A                                 |
| 92    | 101 | 1243.7312 | 1242.7239 | 1242.6456 | 63  | 0    | R.IQLVEEELDR.A                                  |
| 92    | 105 | 1728.0024 | 1726.9951 | 1726.8849 | 64  | 1    | R.IQLVEEELDRAQER.L                              |
| 137   | 149 | 1632.9154 | 1631.9081 | 1631.8076 | 62  | 1    | K.DEEKMEIQEIQLK.E                               |
| 141   | 149 | 1131.6670 | 1130.6597 | 1130.6005 | 52  | 0    | K.MEIQEIQLK.E                                   |
| 141   | 149 | 1147.6593 | 1146.6520 | 1146.5954 | 49  | 0    | K.MEIQEIQLK.E Oxidation (M)                     |
| 141   | 152 | 1460.8265 | 1459.8192 | 1459.7592 | 41  | 1    | K.MEIQEIQLKEAK.H Deamidated (NQ)                |
| 141   | 152 | 1475.8484 | 1474.8411 | 1474.7701 | 48  | 1    | K.MEIQEIQLKEAK.H Oxidation (M)                  |
| 141   | 152 | 1476.8030 | 1475.7957 | 1475.7541 | 28  | 1    | K.MEIQEIQLKEAK.H Deamidated (NQ); Oxidation (M) |
| 153   | 160 | 926.4818  | 925.4745  | 925.4253  | 53  | 0    | K.HIAEDADR.K                                    |
| 153   | 161 | 1054.5851 | 1053.5778 | 1053.5203 | 55  | 1    | K.HIAEDADR.K.Y                                  |
| 168   | 178 | 1314.8416 | 1313.8343 | 1313.7554 | 60  | 1    | R.KLVIIESDLER.A                                 |
| 169   | 178 | 1186.7365 | 1185.7292 | 1185.6605 | 58  | 0    | K.LVIIESDLER.A                                  |
| 169   | 182 | 1671.9976 | 1670.9903 | 1670.8839 | 64  | 1    | K.LVIIESDLERAER.A                               |
| 190   | 198 | 1120.5782 | 1119.5709 | 1119.5117 | 53  | 0    | K.CAELEELK.T Carbamidomethyl (C)                |
| 190   | 205 | 1891.0714 | 1890.0641 | 1889.9404 | 65  | 1    | K.CAELEELKTVTNNLK.S Carbamidomethyl (C)         |
| 199   | 213 | 1648.9156 | 1647.9083 | 1647.8203 | 53  | 1    | K.TVTNNLKSLEAQAEK.Y 3 Deamidated (NQ)           |
| 218   | 226 | 1182.6207 | 1181.6134 | 1181.5452 | 58  | 1    | K.EDKYEELK.V                                    |
| 234   | 244 | 1308.7417 | 1307.7344 | 1307.6106 | 95  | 1    | K.EAETRAEFAER.S                                 |
| 252   | 264 | 1538.8136 | 1537.8063 | 1537.7148 | 60  | 0    | K.SIDDLEDELYAQK.L                               |
| 269   | 284 | 1758.9299 | 1757.9226 | 1757.8141 | 62  | 0    | K.AISEELDHALNDMTSI.-                            |
| 269   | 284 | 1774.9274 | 1773.9201 | 1773.8091 | 63  | 0    | K.AISEELDHALNDMTSI.- Oxidation (M)              |

4700 MS/MS Precursor 1314.84 Spec #1 MC[BP = 86.1, 3006]

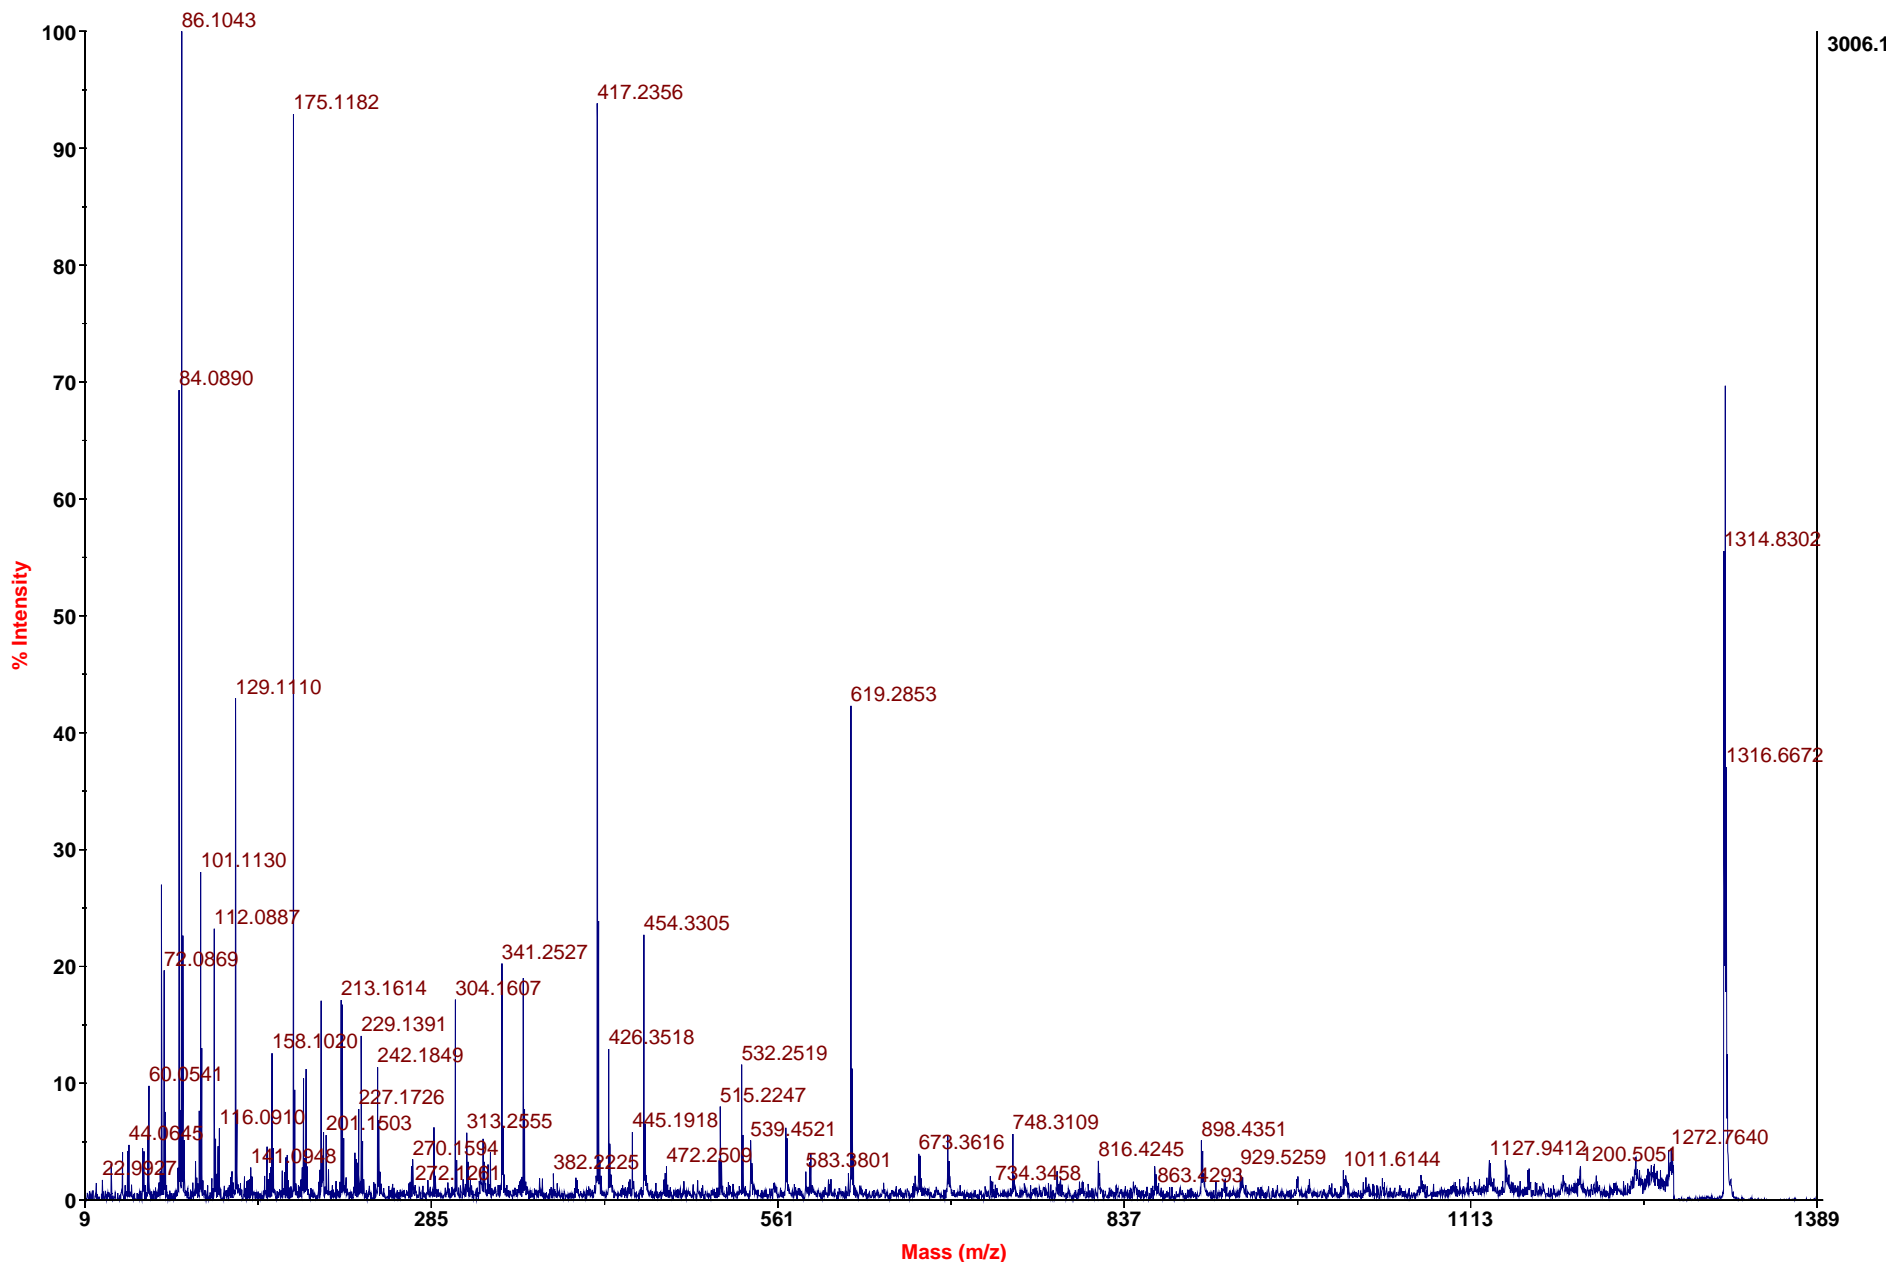

4700 MS/MS Precursor 926.482 Spec #1 MC[BP = 175.1, 3809]

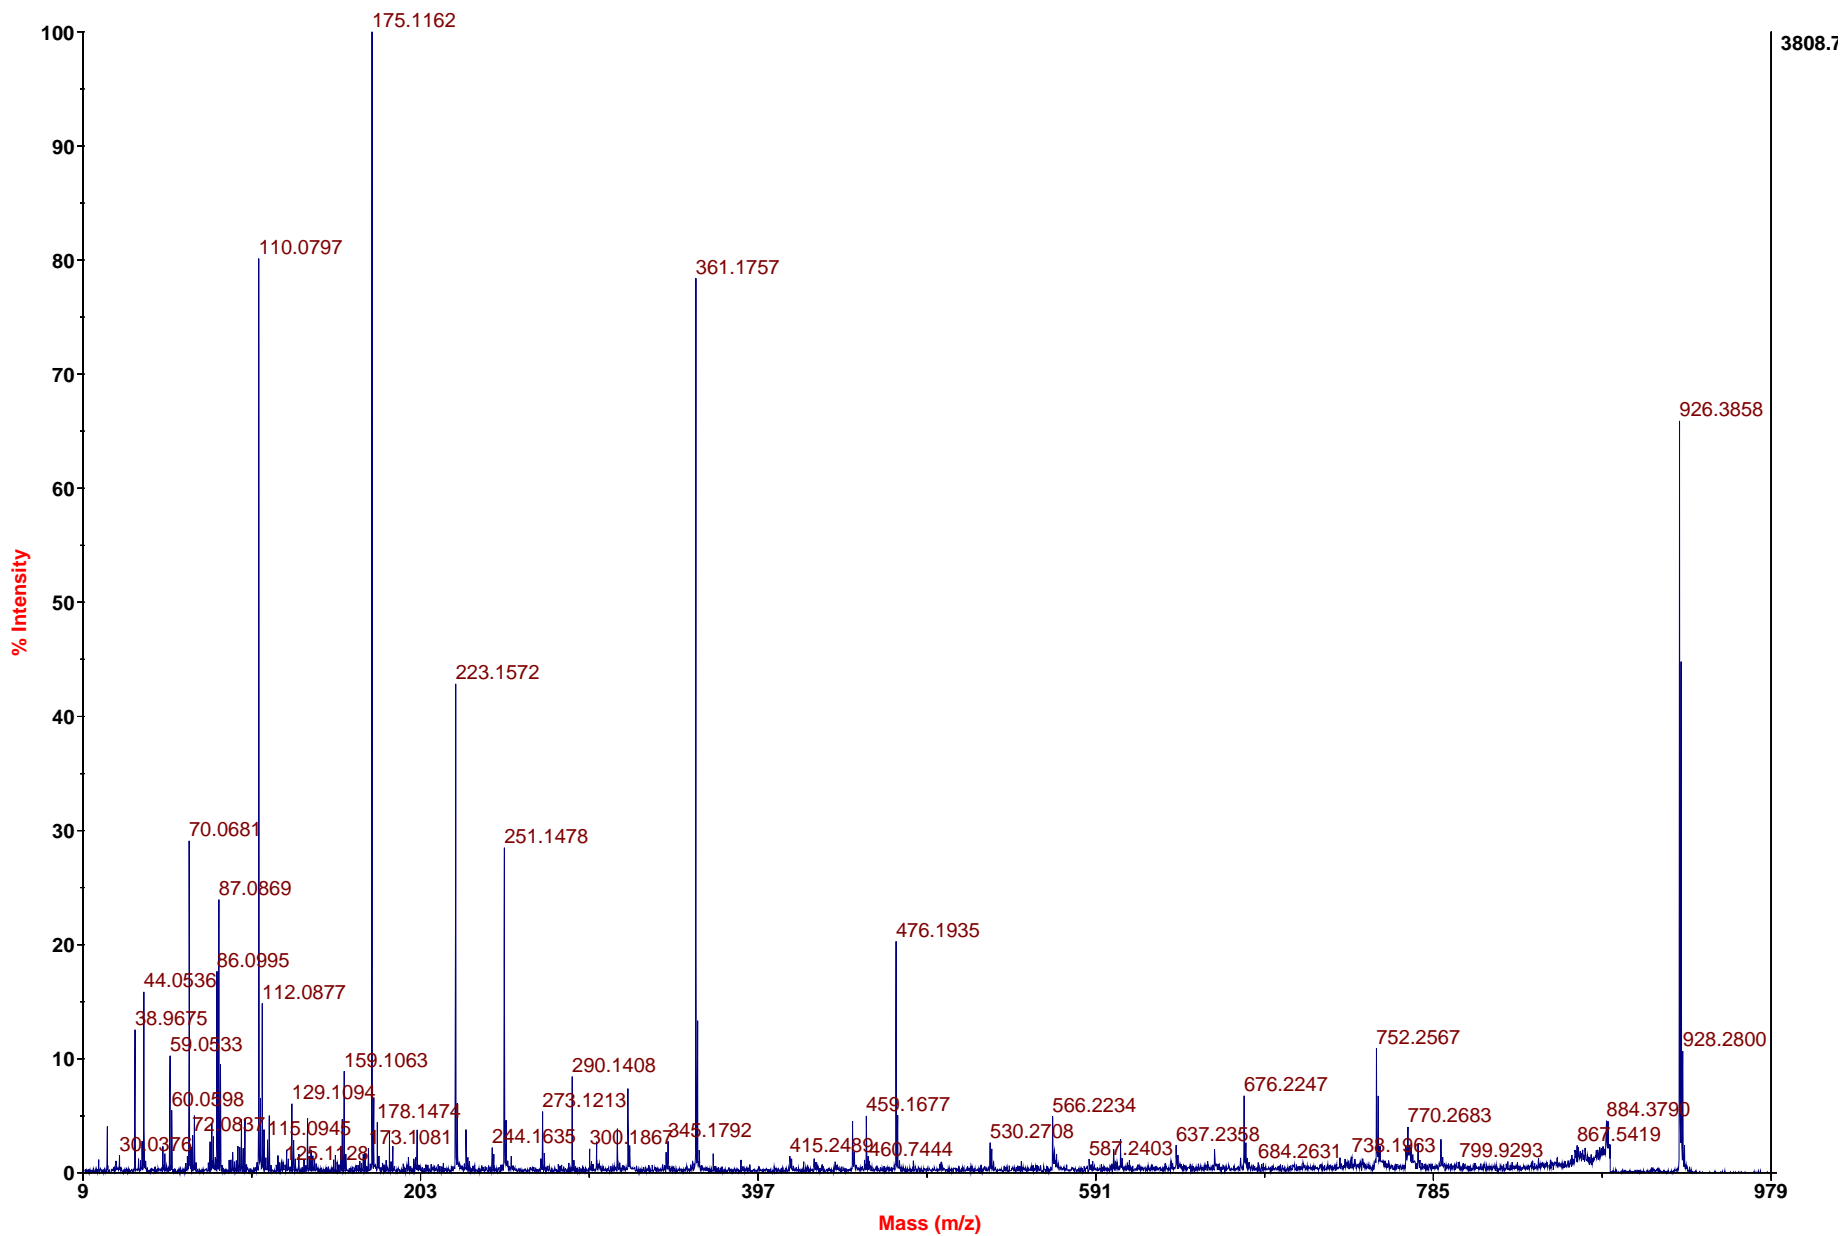

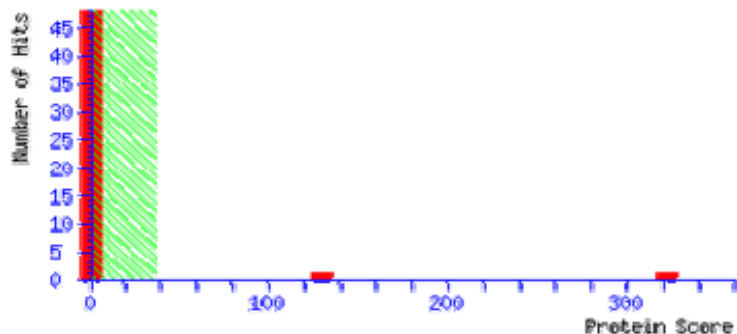

## Peptide Summary Report

Format As

Peptide Summary

[Help](#)

Significance threshold  $p <$

Max. number of hits

Standard scoring  MudPIT scoring

Ions score or expect cut-off

Show sub-sets

Show pop-ups  Suppress pop-ups

Sort unassigned

Require bold red

Select All

Select None

Search Selected

Error tolerant

1. [TMRBA](#) **Mass:** 32661 **Score:** 323 **Matches:** 12(11) **Sequences:** 12(11) **emPAI:** 5.50  
tropomyosin alpha chain, cardiac and skeletal muscle [validated] - rabbit

Check to include this hit in error tolerant search

| Query                                                  | Observed  | Mr(expt)  | Mr(calc)  | ppm  | Miss | Score | Expect  | Rank | Unique | Peptide                            |
|--------------------------------------------------------|-----------|-----------|-----------|------|------|-------|---------|------|--------|------------------------------------|
| <input checked="" type="checkbox"/> <a href="#">1</a>  | 926.4818  | 925.4745  | 925.4253  | 53.2 | 0    | 61    | 0.00017 | 1    | U      | K.HIAEDADR.K                       |
| <input checked="" type="checkbox"/> <a href="#">2</a>  | 1073.6185 | 1072.6112 | 1072.5513 | 55.9 | 1    | 49    | 0.0032  | 1    | U      | K.LDKENALDR.A                      |
| <input checked="" type="checkbox"/> <a href="#">3</a>  | 1120.5782 | 1119.5709 | 1119.5117 | 52.9 | 0    | 46    | 0.0079  | 1    | U      | K.CAELEELK.T + Carbamidomethyl (C) |
| <input checked="" type="checkbox"/> <a href="#">4</a>  | 1186.7365 | 1185.7292 | 1185.6605 | 58.0 | 0    | 44    | 0.0046  | 1    | U      | K.LVIIESDLER.A                     |
| <input checked="" type="checkbox"/> <a href="#">5</a>  | 1243.7312 | 1242.7239 | 1242.6456 | 63.1 | 0    | 50    | 0.0018  | 1    |        | R.IQLVEEELDR.A                     |
| <input checked="" type="checkbox"/> <a href="#">6</a>  | 1314.8416 | 1313.8343 | 1313.7554 | 60.1 | 1    | 67    | 1.6e-05 | 1    | U      | R.KLVIIESDLER.A                    |
| <input checked="" type="checkbox"/> <a href="#">7</a>  | 1399.8395 | 1398.8322 | 1398.7467 | 61.2 | 1    | 24    | 0.62    | 1    |        | R.RIQLVEEELDR.A                    |
| <input checked="" type="checkbox"/> <a href="#">8</a>  | 1460.8265 | 1459.8192 | 1459.7267 | 63.4 | 1    | 80    | 2.7e-06 | 1    |        | K.KATDAEADVASLNR.R                 |
| <input checked="" type="checkbox"/> <a href="#">9</a>  | 1488.8333 | 1487.8260 | 1487.7328 | 62.7 | 1    | 50    | 0.0025  | 1    |        | K.ATDAEADVASLNR.I                  |
| <input checked="" type="checkbox"/> <a href="#">10</a> | 1538.8136 | 1537.8063 | 1537.7148 | 59.6 | 0    | 85    | 9.4e-07 | 1    | U      | K.SIDDLEDELYAQK.L                  |
| <input checked="" type="checkbox"/> <a href="#">14</a> | 1728.0024 | 1726.9951 | 1726.8849 | 63.8 | 1    | 37    | 0.039   | 1    |        | R.IQLVEEELDRAQR.L                  |
| <input checked="" type="checkbox"/> <a href="#">15</a> | 1758.9299 | 1757.9226 | 1757.8141 | 61.7 | 0    | 89    | 3.7e-07 | 1    | U      | K.AISELDHALNDMTSI.-                |



## Protein View

Match to: **TMRBA** Score: **323**

**tropomyosin alpha chain, cardiac and skeletal muscle [validated] - rabbit**

Found in search of ppw\_k6\_129990872610.txt

Nominal mass (M<sub>r</sub>): **32661**; Calculated pI value: **4.69**

NCBI BLAST search of [TMRBA](#) against nr

Unformatted [sequence string](#) for pasting into other applications

Taxonomy: [Oryctolagus cuniculus](#)

Links to retrieve other entries containing this sequence from NCBI Entrez:

(no taxonomy information for this entry)  
(no taxonomy information for this entry)

Variable modifications: Carbamidomethyl (C), Deamidated (NQ), Oxidation (M)

Cleavage by Trypsin: cuts C-term side of KR unless next residue is P

Sequence Coverage: **33%**

Matched peptides shown in **Bold Red**

1 MDAIKKKMQM LK**LDKENALD** RAEQAEADKK AAEDRSKQLE DELVSLQKKL  
51 KGTEDELDKY SEALKDAQEK LELA**EKKATD** **AADVASLNR** RIQLVEEELD  
101 **RAQER**LATAL QKLEEA**EKAA** DESERGMKVI ESRAQKDEEK MEIQEIQLKE  
151 AK**HIAEDADR** KYEEVARKLV **IIESDLER**AE ERAELSEGKC **AELEELK**TV  
201 TNNLKSLEAQ A**EKYSQKEDK** YEEIKVLSL KLKEAETRAE FAERSVTKLE  
251 **KSIDDELEL** **YAQKLKYKAI** **SEELDHALND** **MTSI**

Show predicted peptides also

Sort Peptides By

Residue Number  Increasing Mass  Decreasing Mass

| Start - End | Observed  | Mr (expt) | Mr (calc) | ppm | Miss | Sequence                                                           |
|-------------|-----------|-----------|-----------|-----|------|--------------------------------------------------------------------|
| 13 - 21     | 1073.6185 | 1072.6112 | 1072.5513 | 56  | 1    | K.LDKENALDR.A ( <a href="#">Ions score 49</a> )                    |
| 77 - 90     | 1460.8265 | 1459.8192 | 1459.7267 | 63  | 1    | K.KATDAEADVASLNR.R ( <a href="#">Ions score 80</a> )               |
| 78 - 91     | 1488.8333 | 1487.8260 | 1487.7328 | 63  | 1    | K.ATDAEADVASLNR.R.I ( <a href="#">Ions score 50</a> )              |
| 91 - 101    | 1399.8395 | 1398.8322 | 1398.7467 | 61  | 1    | R.RIQLVEEELDR.A ( <a href="#">Ions score 24</a> )                  |
| 92 - 101    | 1243.7312 | 1242.7239 | 1242.6456 | 63  | 0    | R.IQLVEEELDR.A ( <a href="#">Ions score 50</a> )                   |
| 92 - 105    | 1728.0024 | 1726.9951 | 1726.8849 | 64  | 1    | R.IQLVEEELDRAQER.L ( <a href="#">Ions score 37</a> )               |
| 153 - 160   | 926.4818  | 925.4745  | 925.4253  | 53  | 0    | K.HIAEDADR.K ( <a href="#">Ions score 61</a> )                     |
| 168 - 178   | 1314.8416 | 1313.8343 | 1313.7554 | 60  | 1    | R.KLVIIIESDLER.A ( <a href="#">Ions score 67</a> )                 |
| 169 - 178   | 1186.7365 | 1185.7292 | 1185.6605 | 58  | 0    | K.LVIIIESDLER.A ( <a href="#">Ions score 44</a> )                  |
| 190 - 198   | 1120.5782 | 1119.5709 | 1119.5117 | 53  | 0    | K.CAELEELK.T Carbamidomethyl (C) ( <a href="#">Ions score 46</a> ) |
| 252 - 264   | 1538.8136 | 1537.8063 | 1537.7148 | 60  | 0    | K.SIDDELELYAQK.L ( <a href="#">Ions score 85</a> )                 |
| 269 - 284   | 1758.9299 | 1757.9226 | 1757.8141 | 62  | 0    | K.AISELDHALNDMTSI.- ( <a href="#">Ions score 89</a> )              |
